# Supplementary material for: Dynamic single-cell transcriptomics reveals lsamp-guided neural network formation in male S. japonicum driving female reproduction
Source: Research Square preprint supplement (doi:10.21203/rs.3.rs-6983189/v1), 2025-07-10
Supplement: Supplementary file 1 [file 0230c8e1c0dd0fef3b5b35e4.xlsx]

## Sheet: Sheet1
Table S2. List of homologous genes in S. japonicum identified based on conserved cell markers reported in S. mansoni.
GeneID	Cell Type	Gene description	Short name
Sjc-0005962	neoblast	Nanos-2	nanos2
Sjc-0001797	neoblast	Neurogenic locus Notch protein	notch
Sjc-0001581	neoblast	fibroblast growth factor receptor a	fgfra
Sjc-0009231	GSC	Protein boule-like	boll
Sjc-0008219	GSC	HORMA domain-containing protein 2	horm2
Sjc-0007561	GSC	NADH-quinone oxidoreductase subunit B	nuob
Sjc-0004774	GSC	Meiosis-specific with OB domain-containing protein	meiob
Sjc-0003683	GSC	Nucleolar protein 4-like	nol4l
Sjc-0009220	GSC	Hypothetical protein	eled
Sjc-0006622	GSC	Nanos-1	nanos1
Sjc-0004512	female gamete	C type lectin	clec
Sjc-0000007	female gamete	Bone marrow proteoglycan	bmpg
Sjc-0007264	male gamete	Hypothetical protein	hypothetical protein
Sjc-0006842	male gamete	Centrosomal protein of 162 kDa (Fragment)	cep162
Sjc-0006753	Mehlis’ gland	Hypothetical protein	hypothetical protein
Sjc-0004300	Mehlis’ gland	Hypothetical protein	hypothetical protein
Sjc-0008351	Mehils' gland	Reticulocalbin 2	reticulocalbin 2
Sjc-0003576	Mehlis’ gland	Zonadhesin (Fragment)	zonadhesin=vwa
Sjc-0009271	Neuron	Neurogenic differentiation factor 1	N/A
Sjc-0000908	Neuron	Lachesin	Lachesin
Sjc-0008841	Neuron	Thrombospondin-4	N/A
Sjc-0001267	Neuron	Neuroendocrine protein 7B2	7b2
Sjc-0004182	Neuron	bone morphogenetic protein-like protein	bmp
Sjc-0002936	Neuron	kk7+	kk7+
Sjc-0006634	Neuron	Wnt-2	wnt2
Sjc-0000718	Neuron	Wnt-4	wnt4
Sjc-0006445	Neuron	Wnt-5b	wnt5b
Sjc-0006951	Neuron	Wnt-7b	wnt7b
Sjc-0007885	Neuron	Inhibin/Activin TGF-beta family	inact
Sjc-0008945	ciliated neuron	Tubulin polymerization-promoting protein family member 2	N/A
Sjc-0007314	Tegument	glucose transport protein	gtp
Sjc-0000004	T syncytial	tsp2	tsp2
Sjc-0000576	T progeny	zfp1-1	zfp1-1
Sjc-0002985	T-progeny	onzin	onzin
Sjc-0000920	Tegument	tegument-allergen-like protein	tal
Sjc-0000125	Tegument	25 kDa integral membrane protein	sj25
Sjc-0008832	Tegument	Nucleotide pyrophosphatase:phosphodiesterase 5	npp
Sjc-0007836	T-annexin	Annexin A5	annexin
Sjc-0000295	T-syncytial	calpain	calp
Sjc-0005717	Parenchyma	cb2	cb2
Sjc-0005093	Parenchyma	lap	lap
Sjc-0006651	Parenchyma	serpin	serpin
Sjc-0004956	Parenchyma	tgfbi	tgfbi
Sjc-0008271	parenchyma	Uncharacterized protein SJCHGC09766	upf0506
Sjc-0003036	parenchyma	Urease accessory protein UreD 2	ured2
Sjc-0007743	muscle	myosin	myosin
Sjc-0004691	muscle	troponin	troponin
Sjc-0009480	muscle	Tropomyosin-2	tpm2
Sjc-0002990	muscle	Zinc finger protein SNAI1	N/A
Sjc-0002678	muscle	Helicase domino	N/A
Sjc-0003985	muscle	Putative alpha-1,3-mannosyl-glycoprotein 2-beta-N-acetylglucosaminyltransferase	N/A
Sjc-0005256	muscle	homeobox protein engrailed-like SMOX-2	N/A
Sjc-0008495	gut	Hepatocyte nuclear factor 4-alpha	hnf4
Sjc-0005525	gut	STE20-like serine/threonine-protein kinase	N/A
Sjc-0002267	gut	Cathepsin B1 isotype 2	cb1.2=ctsb
Sjc-0000153	gut	hemoglobinase	hmgbs
Sjc-0000045	gut	cathepsin L	ctsl
Sjc-0001697	flame cell	Protein turtle homolog B	igsf9b
Sjc-0000530	flame cell	Sialidase	sialidase
Sjc-0002027	Esophagus posterior gland	meg-4.1	meg-4.1
Sjc-0007106	Esophagus posteriorgland	meg-8 a	meg-8 a
Sjc-0008307	Esophagus posteriorgland	meg-8 a	meg-8 a
Sjc-0005644	esophageal gland	Cystatin	Cystatin
Sjc-0001955	esophageal gland	Natterin-4	Natterin-4
Sjc-0008165	esophageal gland	venom allergen-like (VAL) 7 protein	venom allergen-like (VAL) 7 protein
Sjc-0008513	esophageal gland	Annexin B11	Annexin B11
Sjc-0002486	esophageal gland	Palmitoyl-protein thioesterase 1	Palmitoyl-protein thioesterase 1
Sjc-0001296	esophageal gland	Protein asteroid homolog 1	Protein asteroid homolog 1
Sjc-0002094	esophageal gland	Natterin-4	Natterin-4
Sjc-0000541	esophageal gland	Tenascin-X	Tenascin-X
Sjc-0001089	esophageal gland	Splicing factor 3B subunit 6-like protein	Splicing factor 3B subunit 6-like protein
Sjc-0005645	esophageal gland	Cystatin	Cystatin
Sjc-0005244	vitellocyte	Extracellular superoxide dismutase [Cu-Zn]	sod
Sjc-0005796	vitellocyte	Tyrosinase 1	tyrosinase 1
Sjc-0005020	vitellocyte	Trematode Eggshell Synthesis protein 2	tes2
Sjc-0000176	vitellocyte	Tetraspanin	tetraspanin
Sjc-0000087	vitellocyte	Beta-secretase 1	beta-secretase 1
Sjc-0001840	vitellocyte	Serine hydroxymethyltransferase	serine hmt
Sjc-0006707	vitellocyte	Y+L amino acid transporter 2	y+lat2
Sjc-0005030	vitellocyte	Ecdysone-induced protein E78	e78
Sjc-0008097	vitellocyte	Subfamily S1A unassigned peptidase	peptidase s1a
Sjc-0001604	vitellocyte	Hepatocyte nuclear factor 6	hnf-6
Sjc-0001888	vitellocyte	Crystallin βγ-1	cryβγ-1
Sjc-0009196	vitellocyte	C-type lectin-like	c-type lectin-like
Sjc-0003387	vitellocyte	Uncharacterized protein	Smp_074710
Sjc-0005077	vitellocyte	Putative uncharacterized protein	Smp_138570
Sjc-0003451	vitellocyte	Myb/SANT-like DNA-binding domain-containing protein 3	msantd3
Sjc-0000108	vitellocyte	vitellogenic factor 1	vf1
Sjc-0007461	vitellocyte	P48 eggshell protein	p48
Sjc-0001887	vitellocyte	Ataxin-2 homolog	ataxin2
Sjc-0008397	vitellocyte	S-adenosylmethionine synthase isoform type-2	MAT2A
