# Supplementary material for: Dynamic single-cell transcriptomics reveals lsamp-guided neural network formation in male S. japonicum driving female reproduction
Source: Research Square preprint supplement (doi:10.21203/rs.3.rs-6983189/v1), 2025-07-10
Supplement: Supplementary file 2 [file 042b6f4f1ccfa8977431413d.xlsx]

## Sheet:  Primers of probes
Table S4. Primer sequences for probe synthesis in S. japonicum.
Primer ID	gene name	Forward primer	Reverse primer
Sjc-0000045	ctsl	CCAACTGCCACTATCGTAA	TTCTCTACCGTAACCAACAG
Sjc-0000095	cacnb1	CAGCAACACATCCACCTT	TGACGAGCCGATCTACTT
Sjc-0000108	vf1	GTGAAGACAACTACAGCAAT	AACAGGAACTAGATGGCATT
Sjc-0000124	sj25	GGTGTTAGACCATCCATCTT	TCGTTGTCGTTGTGTAAATG
Sjc-0000176	tetraspanin	TGTAATCGGACCAATGCTTA	GCCAACAACCTTGATGAATA
Sjc-0000277	slc7a14	ATCAAGTGTGCCGTCATC	TCACCAGGAAGACCAGAG
Sjc-0000278	rreb1	TCTTCACCATACAAGCAACA	ACAACCAGCAATAGGACAG
Sjc-0000373	lsamp	ATAATAGACGGCTTCATCCA	GCTATCACTCTTGTAGAACTG
Sjc-0000530	sialidase	CTTCACAATCACCTACATCTG	GGTAATCACATCCTCACTCA
Sjc-0000744	hypothetical protein	AACAACCTGATGGAGATGAA	ACTGCCTTCTGACTGGAT
Sjc-0000795	hypothetical protein	ATGCCAGTTTGTAAACCTCA	TGTCGTCCACTTGCTCTT
Sjc-0000798	ano-7	GACCGACTCATACAAGAAGA	ACCAATACCAGCATTACCAT
Sjc-0000814	nrps	GTCCGAATGGTGATGTTATAC	TGGCGACTGAGATGTAATAG
Sjc-0000843	ribc2	AAGCGACAACAAGACGAT	TAATTCCAAGAGCAGACACT
Sjc-0000920	tal	GGCAACTACTGAGTACAGATTA	GCCATACACGACCATATTCA
Sjc-0001200	hypothetical protein	GATCTAAACATCCTGTCTATGC	ATGGGCGTGTAAATCTTCTA
Sjc-0001267	7b2	CAGGTCAATGGATAGATTATGC	TTTCGTGGGATGGTTTGTA
Sjc-0001566	ccdc	ACAAGAACAACGCTCAGAT	AGGAGACGACCAACAAGT
Sjc-0001890	sgf1	GACGATGACGCTGATGAT	TTGTGACGCAGTGAATGT
Sjc-0002320	fhl2	AATATCGTGGACAACAATGG	ACAATCAGCACAGTATGGT
Sjc-0002588	slc6a5	ACACTTGGTCTTGGTTCAC	TGGCAGATTCGCACTAAC
Sjc-0002936	kk7	ACTGTGGATTCTATGGTGAA	TCGCTTACTCTGCATACG
Sjc-0002985	plac8	CAACCGTATGCTGTTAGAC	CGATGGTATGCTCTTAACG
Sjc-0003010	hypothetical protein	ATCTCGAAGCAAGAAGTCAA	GTCTTCCTTACCGATTAGCA
Sjc-0003040	hypothetical protein	AGTCCAACGAACCATCTTAT	TTCAACTACTGCCACATCTT
Sjc-0003576	zonadhesin	CCTTCAGCAACGACCTAC	CATCCTACACGACGCAAT
Sjc-0003639	hypothetical protein	GTGTCAATTCATGGATCTGT	GGAAGTCGAAGTCTTGTAAT
Sjc-0004182	bmp	GTAGTAGTAGTCGTCGTCAT	ACAATCCGTATCATCTGGTT
Sjc-0004774	meiob	GGTTCCTATGAAGAGCGATT	AGTGGTCAATGCGATGTG
Sjc-0004922	tubulin alpha-1 chain	TTGGTAAGGAGTTGGTTGAT	TTGGAGGTTGGTAGTTGATT
Sjc-0005717	ctsb	ATCAGTCATCTTGTGGTTCA	TTCGGTATTCCAGCATTCA
Sjc-0005931	acss2	GCTGATGCTGGTTGGATAA	GATGCTGCCGACTAACAA
Sjc-0006108	hypothetical protein	GATTAGTGGAGAACCAATGC	GCTCGCTTCATAACCTCT
Sjc-0006622	nanos1	TGAGATTGGTAGAAGACGAA	CGATCATAGAACAAGTTGGT
Sjc-0006754	ddc	CGCTGATATACTCGCTGAT	ACCATACAAGTGAACAATCG
Sjc-0006798	esg-2a	GTTGTTCTTAGCAGCCATC	CCATTACCGCCACCATAA
Sjc-0007561	nuob	CCACTATGTTCCAATGAGAC	AGATGGTGAACGCTTATTAC
Sjc-0007590	pcdh7	TGTGCTTGGTCAGGAGTA	AATATGCGGCGGATTATCA
Sjc-0007782	paramyosin	GGTCGTCGTATGGTTCAA	TACTTGTTGCTCTCATTCCT
Sjc-0008047	klf11	CTTGTCTATTGGGAATGGTATG	GTTGTTGTTGTTGTTGTTGG
Sjc-0008393	hypothetical protein	CCAGATGGGATACAGGAAA	TATTCGTATTGACGGTATCG
Sjc-0008416	cpb	TTGATTGTGGTCCTGTATGG	GCTTCGGTTGGTCTTGAA
Sjc-0008478	hypothetical protein	ACCTTATGACCTGCAACAA	TTGACTGAAGATTCCGAAGA
Sjc-0009220	eled	ATGTCTACTGATTCTGTGTCTG	GTCTGTTGAAGTTACTGTGGT
Sjc-0009231	boll	TGGTCAAGTGAAGGATGTC	CTGGTATAGTAGATGGTTGTTG
Sjc-0009480	tpm2	AGACCAGGCAACTCAAGA	ACCAACAATGCGTAACTCT
