# Supplementary material for: Dynamic single-cell transcriptomics reveals lsamp-guided neural network formation in male S. japonicum driving female reproduction
Source: Research Square preprint supplement (doi:10.21203/rs.3.rs-6983189/v1), 2025-07-10
Supplement: Supplementary file 3 [file 04fa85564411e80fc7dabc96.xlsx]

## Sheet: Sheet1
Table S15. Enriched KEGG pathways for downregulated genes in lsamp RNAi males of S. japonicum.
pathway ID	Description	setSize	enrichmentScore	NES	pvalue	p.adjust	qvalues	rank	leading_edge	core_enrichment
map03010	Ribosome	114	-0.675659	-2.61735	1e-10	2.9e-08	2.52632e-08	1650	tags=54%, list=19%, signal=44%	Sjc_0009230/Sjc_0005536/Sjc_0001212/Sjc_0002913/Sjc_0005277/Sjc_0001577/Sjc_0000919/Sjc_0004910/Sjc_0000855/Sjc_0006699/Sjc_0007523/Sjc_0008365/Sjc_0009429/Sjc_0008927/Sjc_0004749/Sjc_0001046/Sjc_0006243/Sjc_0006359/Sjc_0003950/Sjc_0006480/Sjc_0006472/Sjc_0004660/Sjc_0004233/Sjc_0000661/Sjc_0000036/Sjc_0005128/Sjc_0006529/Sjc_0002600/Sjc_0005661/Sjc_0002514/Sjc_0001802/Sjc_0001285/Sjc_0008088/Sjc…
map05012	Parkinson disease	153	-0.526997	-2.11684	1.98559e-07	2.87911e-05	2.50811e-05	1656	tags=45%, list=19%, signal=37%	Sjc_0005540/Sjc_0000227/Sjc_0003533/Sjc_0006949/Sjc_0008345/Sjc_0005387/Sjc_0002578/Sjc_0003096/Sjc_0005151/Sjc_0009374/Sjc_0009292/Sjc_0009445/Sjc_0009167/Sjc_0009010/Sjc_0003094/Sjc_0006453/Sjc_0004663/Sjc_0004761/Sjc_0000969/Sjc_0005481/Sjc_0002400/Sjc_0007263/Sjc_0001299/Sjc_0009753/Sjc_0006633/Sjc_0004294/Sjc_0006686/Sjc_0000582/Sjc_0009105/Sjc_0003792/Sjc_0003947/Sjc_0006031/Sjc_0009055/Sjc…
map01120	Microbial metabolism in diverse environments	93	-0.55352	-2.06915	2.88912e-06	0.000279282	0.000243294	2590	tags=65%, list=29%, signal=46%	Sjc_0003888/Sjc_0005931/Sjc_0005217/Sjc_0009013/Sjc_0007686/Sjc_0004726/Sjc_0003016/Sjc_0003109/Sjc_0000077/Sjc_0007877/Sjc_0004648/Sjc_0001539/Sjc_0007797/Sjc_0002161/Sjc_0002746/Sjc_0008252/Sjc_0001605/Sjc_0004909/Sjc_0003060/Sjc_0008550/Sjc_0003181/Sjc_0001937/Sjc_0006117/Sjc_0007119/Sjc_0000785/Sjc_0007190/Sjc_0002658/Sjc_0007290/Sjc_0006795/Sjc_0001169/Sjc_0003115/Sjc_0009249/Sjc_0009284/Sjc…
map05010	Alzheimer disease	188	-0.464026	-1.91536	5.23509e-06	0.000379544	0.000330637	2113	tags=47%, list=24%, signal=36%	Sjc_0003841/Sjc_0005398/Sjc_0003765/Sjc_0006912/Sjc_0005455/Sjc_0004931/Sjc_0004498/Sjc_0001147/Sjc_0008039/Sjc_0005848/Sjc_0008077/Sjc_0005246/Sjc_0000172/Sjc_0005540/Sjc_0000227/Sjc_0001084/Sjc_0003996/Sjc_0001555/Sjc_0003533/Sjc_0000087/Sjc_0008345/Sjc_0008074/Sjc_0005387/Sjc_0002578/Sjc_0008230/Sjc_0003096/Sjc_0007991/Sjc_0005151/Sjc_0009292/Sjc_0009445/Sjc_0009010/Sjc_0005456/Sjc_0003094/Sjc…
map00190	Oxidative phosphorylation	72	-0.608424	-2.18582	1.36919e-05	0.000794131	0.000691802	1656	tags=60%, list=19%, signal=49%	Sjc_0005540/Sjc_0008726/Sjc_0003533/Sjc_0008345/Sjc_0005387/Sjc_0003096/Sjc_0005151/Sjc_0009292/Sjc_0004620/Sjc_0009445/Sjc_0003094/Sjc_0001824/Sjc_0002400/Sjc_0007263/Sjc_0000770/Sjc_0008820/Sjc_0007951/Sjc_0004664/Sjc_0005299/Sjc_0002996/Sjc_0009105/Sjc_0003792/Sjc_0003604/Sjc_0006031/Sjc_0006670/Sjc_0008547/Sjc_0003281/Sjc_0002845/Sjc_0008703/Sjc_0005874/Sjc_0007207/Sjc_0003862/Sjc_0005896/Sjc…
map04141	Protein processing in endoplasmic reticulum	95	-0.531993	-1.99235	2.30118e-05	0.00111224	0.000968919	1673	tags=53%, list=19%, signal=43%	Sjc_0000666/Sjc_0001670/Sjc_0000766/Sjc_0008552/Sjc_0004331/Sjc_0005769/Sjc_0009207/Sjc_0005251/Sjc_0009360/Sjc_0006661/Sjc_0000082/Sjc_0006358/Sjc_0005336/Sjc_0006541/Sjc_0004453/Sjc_0004729/Sjc_0006676/Sjc_0006949/Sjc_0008321/Sjc_0003386/Sjc_0009025/Sjc_0001993/Sjc_0009374/Sjc_0008728/Sjc_0006132/Sjc_0005082/Sjc_0000519/Sjc_0000225/Sjc_0001672/Sjc_0000575/Sjc_0000582/Sjc_0007209/Sjc_0001036/Sjc…
map03040	Spliceosome	117	-0.471533	-1.83452	0.000182623	0.00756581	0.00659091	1995	tags=48%, list=23%, signal=38%	Sjc_0007133/Sjc_0000881/Sjc_0001479/Sjc_0003373/Sjc_0007547/Sjc_0001155/Sjc_0004140/Sjc_0003001/Sjc_0007645/Sjc_0000559/Sjc_0003614/Sjc_0003723/Sjc_0002087/Sjc_0002904/Sjc_0001548/Sjc_0003300/Sjc_0001652/Sjc_0001592/Sjc_0006516/Sjc_0000298/Sjc_0005991/Sjc_0007272/Sjc_0004142/Sjc_0000699/Sjc_0001828/Sjc_0003446/Sjc_0000451/Sjc_0001879/Sjc_0005922/Sjc_0008042/Sjc_0007619/Sjc_0007715/Sjc_0001158/Sjc…
map01200	Carbon metabolism	72	-0.538763	-1.93556	0.000508225	0.0184231	0.0160492	2689	tags=68%, list=31%, signal=48%	Sjc_0003888/Sjc_0005931/Sjc_0005217/Sjc_0007686/Sjc_0004726/Sjc_0003109/Sjc_0000077/Sjc_0007877/Sjc_0001539/Sjc_0007797/Sjc_0002161/Sjc_0002746/Sjc_0004909/Sjc_0003060/Sjc_0001024/Sjc_0008550/Sjc_0001937/Sjc_0006117/Sjc_0007119/Sjc_0000785/Sjc_0007190/Sjc_0002658/Sjc_0009581/Sjc_0007290/Sjc_0006795/Sjc_0001169/Sjc_0007032/Sjc_0005974/Sjc_0000560/Sjc_0004570/Sjc_0000303/Sjc_0008801/Sjc_0005478/Sjc…
map00980	Metabolism of xenobiotics by cytochrome P450	10	-0.836308	-1.90073	0.000621598	0.0200293	0.0174484	897	tags=70%, list=10%, signal=63%	Sjc_0004169/Sjc_0003353/Sjc_0003766/Sjc_0002015/Sjc_0006542/Sjc_0001389/Sjc_0001388
map05418	Fluid shear stress and atherosclerosis	56	-0.556121	-1.91421	0.000711088	0.0206216	0.0179643	1335	tags=34%, list=15%, signal=29%	Sjc_0002490/Sjc_0005082/Sjc_0000225/Sjc_0005436/Sjc_0005481/Sjc_0003853/Sjc_0004169/Sjc_0003619/Sjc_0009295/Sjc_0002015/Sjc_0006542/Sjc_0003236/Sjc_0004064/Sjc_0002903/Sjc_0000224/Sjc_0000045/Sjc_0009216/Sjc_0008266/Sjc_0005934
map04145	Phagosome	57	-0.582937	-2.00357	0.000855279	0.0224256	0.0195359	1846	tags=56%, list=21%, signal=45%	Sjc_0002503/Sjc_0004133/Sjc_0000816/Sjc_0008726/Sjc_0000050/Sjc_0004620/Sjc_0002978/Sjc_0002001/Sjc_0001824/Sjc_0003853/Sjc_0000770/Sjc_0008820/Sjc_0007951/Sjc_0004664/Sjc_0005299/Sjc_0006633/Sjc_0002996/Sjc_0003678/Sjc_0007994/Sjc_0008547/Sjc_0002791/Sjc_0005874/Sjc_0002995/Sjc_0003619/Sjc_0006700/Sjc_0004461/Sjc_0007207/Sjc_0004983/Sjc_0007106/Sjc_0000045/Sjc_0006694/Sjc_0008266
map03050	Proteasome	38	-0.615014	-1.96805	0.000936559	0.0224256	0.0195359	2408	tags=82%, list=27%, signal=60%	Sjc_0003502/Sjc_0001817/Sjc_0008905/Sjc_0002992/Sjc_0003444/Sjc_0009676/Sjc_0006912/Sjc_0005848/Sjc_0005254/Sjc_0005246/Sjc_0000172/Sjc_0000227/Sjc_0002578/Sjc_0009010/Sjc_0006453/Sjc_0000969/Sjc_0001299/Sjc_0009753/Sjc_0004294/Sjc_0006686/Sjc_0003947/Sjc_0009055/Sjc_0001467/Sjc_0000927/Sjc_0003851/Sjc_0008991/Sjc_0008490/Sjc_0001199/Sjc_0007462/Sjc_0006212/Sjc_0003539
map05110	Vibrio cholerae infection	38	-0.611143	-1.95566	0.00108261	0.0224256	0.0195359	2308	tags=68%, list=26%, signal=51%	Sjc_0003175/Sjc_0009191/Sjc_0004680/Sjc_0002668/Sjc_0008111/Sjc_0003511/Sjc_0008726/Sjc_0004620/Sjc_0001824/Sjc_0003038/Sjc_0003853/Sjc_0000770/Sjc_0008820/Sjc_0007951/Sjc_0004664/Sjc_0005299/Sjc_0002996/Sjc_0007536/Sjc_0008547/Sjc_0005874/Sjc_0006700/Sjc_0007207/Sjc_0004983/Sjc_0001080/Sjc_0001079/Sjc_0008266
map00010	Glycolysis / Gluconeogenesis	29	-0.660316	-1.95119	0.00108141	0.0224256	0.0195359	1398	tags=59%, list=16%, signal=49%	Sjc_0006795/Sjc_0009249/Sjc_0009284/Sjc_0007032/Sjc_0000303/Sjc_0008801/Sjc_0005478/Sjc_0002862/Sjc_0001512/Sjc_0005414/Sjc_0004045/Sjc_0005699/Sjc_0003021/Sjc_0001904/Sjc_0003353/Sjc_0004159/Sjc_0006464
map04612	Antigen processing and presentation	40	-0.579938	-1.86165	0.00168573	0.0309012	0.0269194	1632	tags=50%, list=19%, signal=41%	Sjc_0000153/Sjc_0002277/Sjc_0000050/Sjc_0001779/Sjc_0000225/Sjc_0000152/Sjc_0002261/Sjc_0002791/Sjc_0003619/Sjc_0002267/Sjc_0002294/Sjc_0009697/Sjc_0000224/Sjc_0000045/Sjc_0002273/Sjc_0002266/Sjc_0000226/Sjc_0002295/Sjc_0002264/Sjc_0009689
map03013	RNA transport	113	-0.424285	-1.64003	0.00170489	0.0309012	0.0269194	3003	tags=57%, list=34%, signal=38%	Sjc_0000547/Sjc_0001944/Sjc_0000167/Sjc_0000993/Sjc_0006672/Sjc_0007415/Sjc_0006703/Sjc_0005563/Sjc_0005163/Sjc_0002958/Sjc_0008548/Sjc_0006139/Sjc_0002841/Sjc_0008912/Sjc_0006751/Sjc_0003897/Sjc_0006158/Sjc_0000666/Sjc_0006804/Sjc_0003210/Sjc_0009033/Sjc_0001750/Sjc_0007507/Sjc_0001063/Sjc_0006201/Sjc_0004924/Sjc_0008785/Sjc_0004202/Sjc_0002364/Sjc_0006248/Sjc_0004377/Sjc_0009114/Sjc_0003171/Sjc…
map05016	Huntington disease	179	-0.386015	-1.59216	0.00217525	0.0371073	0.0323257	2248	tags=50%, list=26%, signal=38%	Sjc_0002161/Sjc_0001653/Sjc_0007977/Sjc_0002293/Sjc_0004312/Sjc_0003513/Sjc_0003841/Sjc_0005398/Sjc_0003765/Sjc_0006912/Sjc_0007976/Sjc_0004931/Sjc_0004534/Sjc_0001147/Sjc_0008039/Sjc_0005848/Sjc_0004561/Sjc_0005246/Sjc_0000172/Sjc_0006080/Sjc_0005540/Sjc_0000227/Sjc_0003533/Sjc_0002403/Sjc_0004335/Sjc_0008345/Sjc_0005387/Sjc_0002578/Sjc_0003096/Sjc_0005151/Sjc_0002388/Sjc_0009292/Sjc_0009445/Sjc…
map04144	Endocytosis	125	-0.422298	-1.64358	0.00267637	0.0431194	0.0375631	1937	tags=30%, list=22%, signal=24%	Sjc_0005005/Sjc_0006033/Sjc_0005113/Sjc_0009492/Sjc_0000816/Sjc_0008774/Sjc_0001280/Sjc_0004335/Sjc_0009452/Sjc_0006806/Sjc_0003800/Sjc_0000360/Sjc_0001255/Sjc_0002978/Sjc_0009149/Sjc_0002803/Sjc_0001288/Sjc_0008960/Sjc_0003590/Sjc_0007256/Sjc_0009493/Sjc_0007536/Sjc_0002935/Sjc_0002538/Sjc_0008962/Sjc_0000747/Sjc_0005691/Sjc_0001942/Sjc_0008369/Sjc_0001080/Sjc_0002000/Sjc_0005748/Sjc_0001079/Sjc…
map05204	Chemical carcinogenesis	14	-0.724199	-1.80201	0.00508106	0.075664	0.0659142	897	tags=50%, list=10%, signal=45%	Sjc_0004169/Sjc_0003353/Sjc_0003766/Sjc_0002015/Sjc_0006542/Sjc_0001389/Sjc_0001388
map04714	Thermogenesis	118	-0.423258	-1.64684	0.00521821	0.075664	0.0659142	1927	tags=35%, list=22%, signal=28%	Sjc_0001147/Sjc_0001754/Sjc_0008039/Sjc_0007013/Sjc_0005540/Sjc_0003533/Sjc_0008345/Sjc_0005387/Sjc_0003096/Sjc_0005151/Sjc_0009292/Sjc_0009445/Sjc_0002490/Sjc_0003094/Sjc_0001901/Sjc_0002400/Sjc_0003853/Sjc_0007263/Sjc_0003371/Sjc_0009105/Sjc_0003792/Sjc_0006031/Sjc_0006670/Sjc_0003281/Sjc_0002845/Sjc_0005661/Sjc_0008703/Sjc_0005808/Sjc_0003862/Sjc_0005896/Sjc_0003280/Sjc_0003419/Sjc_0008545/Sjc…
map00620	Pyruvate metabolism	25	-0.642032	-1.84761	0.0059425	0.078333	0.0682392	1616	tags=76%, list=18%, signal=62%	Sjc_0005931/Sjc_0005217/Sjc_0007686/Sjc_0001539/Sjc_0003060/Sjc_0007190/Sjc_0002658/Sjc_0009249/Sjc_0009284/Sjc_0007032/Sjc_0000303/Sjc_0002862/Sjc_0005414/Sjc_0003261/Sjc_0004045/Sjc_0005699/Sjc_0003021/Sjc_0001724/Sjc_0001049
map00330	Arginine and proline metabolism	17	-0.686697	-1.8053	0.00571208	0.078333	0.0682392	2624	tags=94%, list=30%, signal=66%	Sjc_0007056/Sjc_0001834/Sjc_0006681/Sjc_0007057/Sjc_0000599/Sjc_0008550/Sjc_0002981/Sjc_0001293/Sjc_0007290/Sjc_0009249/Sjc_0002862/Sjc_0000388/Sjc_0000358/Sjc_0005699/Sjc_0005053/Sjc_0006467
map01230	Biosynthesis of amino acids	45	-0.542759	-1.78684	0.00654288	0.0790598	0.0688725	2352	tags=60%, list=27%, signal=44%	Sjc_0000077/Sjc_0007877/Sjc_0007797/Sjc_0004909/Sjc_0000599/Sjc_0001024/Sjc_0008550/Sjc_0001293/Sjc_0006117/Sjc_0000785/Sjc_0007290/Sjc_0006795/Sjc_0000560/Sjc_0004570/Sjc_0000303/Sjc_0008801/Sjc_0005478/Sjc_0001512/Sjc_0001904/Sjc_0004159/Sjc_0007810/Sjc_0007876/Sjc_0006464/Sjc_0002674/Sjc_0002603/Sjc_0006467/Sjc_0003316
map04142	Lysosome	114	-0.41349	-1.60177	0.00637117	0.0790598	0.0688725	1962	tags=44%, list=22%, signal=35%	Sjc_0004936/Sjc_0003286/Sjc_0005464/Sjc_0004985/Sjc_0002842/Sjc_0006716/Sjc_0001680/Sjc_0001685/Sjc_0000153/Sjc_0008446/Sjc_0002277/Sjc_0000050/Sjc_0001779/Sjc_0009746/Sjc_0007865/Sjc_0007624/Sjc_0001288/Sjc_0005834/Sjc_0000770/Sjc_0005299/Sjc_0000152/Sjc_0002485/Sjc_0004987/Sjc_0000158/Sjc_0002996/Sjc_0007625/Sjc_0000128/Sjc_0007957/Sjc_0002261/Sjc_0003219/Sjc_0006239/Sjc_0008547/Sjc_0002843/Sjc…
map05323	Rheumatoid arthritis	19	-0.659067	-1.80088	0.00702775	0.0815219	0.0710172	1610	tags=74%, list=18%, signal=60%	Sjc_0008726/Sjc_0004620/Sjc_0001824/Sjc_0000770/Sjc_0008820/Sjc_0007951/Sjc_0004664/Sjc_0005299/Sjc_0002996/Sjc_0008547/Sjc_0005874/Sjc_0003619/Sjc_0007207/Sjc_0000045
map04915	Estrogen signaling pathway	59	-0.493736	-1.71483	0.00782246	0.0872505	0.0760077	1314	tags=34%, list=15%, signal=29%	Sjc_0009746/Sjc_0005082/Sjc_0000225/Sjc_0005481/Sjc_0008960/Sjc_0006931/Sjc_0002935/Sjc_0008962/Sjc_0006908/Sjc_0009295/Sjc_0004839/Sjc_0003236/Sjc_0009697/Sjc_0002903/Sjc_0000224/Sjc_0005470/Sjc_0009216/Sjc_0000226/Sjc_0005471/Sjc_0009689
map00051	Fructose and mannose metabolism	18	-0.645074	-1.73379	0.0104746	0.112505	0.0980076	1889	tags=44%, list=21%, signal=35%	Sjc_0004206/Sjc_0005043/Sjc_0002830/Sjc_0006795/Sjc_0008801/Sjc_0005612/Sjc_0001904/Sjc_0006464
map04626	Plant-pathogen interaction	23	-0.615357	-1.72183	0.0123529	0.124246	0.108236	1303	tags=43%, list=15%, signal=37%	Sjc_0005082/Sjc_0000225/Sjc_0007624/Sjc_0005481/Sjc_0005123/Sjc_0009295/Sjc_0003236/Sjc_0002903/Sjc_0000224/Sjc_0009216
map00710	Carbon fixation in photosynthetic organisms	17	-0.650393	-1.70986	0.0132814	0.124246	0.108236	2249	tags=76%, list=26%, signal=57%	Sjc_0007686/Sjc_0007797/Sjc_0003060/Sjc_0008550/Sjc_0002658/Sjc_0007290/Sjc_0000560/Sjc_0005478/Sjc_0001512/Sjc_0001904/Sjc_0001724/Sjc_0006464/Sjc_0002674
map05152	Tuberculosis	55	-0.489004	-1.68215	0.0129636	0.124246	0.108236	1738	tags=38%, list=20%, signal=31%	Sjc_0000816/Sjc_0001280/Sjc_0003618/Sjc_0007942/Sjc_0000050/Sjc_0009746/Sjc_0005481/Sjc_0005700/Sjc_0000770/Sjc_0005299/Sjc_0005157/Sjc_0002996/Sjc_0008547/Sjc_0005874/Sjc_0009295/Sjc_0004839/Sjc_0003236/Sjc_0002903/Sjc_0005470/Sjc_0009216/Sjc_0005471
map00480	Glutathione metabolism	22	-0.600126	-1.66561	0.0128311	0.124246	0.108236	2491	tags=68%, list=28%, signal=49%	Sjc_0002483/Sjc_0006687/Sjc_0000077/Sjc_0006211/Sjc_0007119/Sjc_0005000/Sjc_0005093/Sjc_0003914/Sjc_0001169/Sjc_0007176/Sjc_0002414/Sjc_0004169/Sjc_0003766/Sjc_0002015/Sjc_0006542
map04210	Apoptosis	72	-0.445017	-1.59876	0.015434	0.139871	0.121848	1403	tags=33%, list=16%, signal=28%	Sjc_0000050/Sjc_0001779/Sjc_0009746/Sjc_0004663/Sjc_0007624/Sjc_0003853/Sjc_0004987/Sjc_0002261/Sjc_0007994/Sjc_0000688/Sjc_0003619/Sjc_0004839/Sjc_0002267/Sjc_0002294/Sjc_0007125/Sjc_0000045/Sjc_0002273/Sjc_0002266/Sjc_0005470/Sjc_0006694/Sjc_0008266/Sjc_0005471/Sjc_0002295/Sjc_0002264
map03060	Protein export	20	-0.614025	-1.68002	0.0167426	0.147132	0.128173	2854	tags=75%, list=32%, signal=51%	Sjc_0006936/Sjc_0000636/Sjc_0005769/Sjc_0001716/Sjc_0007964/Sjc_0006131/Sjc_0009443/Sjc_0004061/Sjc_0006763/Sjc_0003692/Sjc_0000582/Sjc_0004426/Sjc_0006700/Sjc_0004983/Sjc_0004709
map00350	Tyrosine metabolism	13	0.84301	1.96229	0.0187379	0.159823	0.139229	399	tags=31%, list=5%, signal=29%	Sjc_0005796/Sjc_0005182/Sjc_0002665/Sjc_0006509
map04139	Mitophagy - yeast	22	-0.581081	-1.61276	0.0206632	0.171209	0.149148	2312	tags=59%, list=26%, signal=44%	Sjc_0007060/Sjc_0006624/Sjc_0001074/Sjc_0003511/Sjc_0008232/Sjc_0008077/Sjc_0003996/Sjc_0002146/Sjc_0008074/Sjc_0007991/Sjc_0003038/Sjc_0007619/Sjc_0007073
map04066	HIF-1 signaling pathway	46	-0.491674	-1.63098	0.022158	0.178495	0.155494	1398	tags=37%, list=16%, signal=31%	Sjc_0006795/Sjc_0007314/Sjc_0008960/Sjc_0003038/Sjc_0008801/Sjc_0005478/Sjc_0002935/Sjc_0001512/Sjc_0005414/Sjc_0008962/Sjc_0005661/Sjc_0004045/Sjc_0003021/Sjc_0004159/Sjc_0005239/Sjc_0006464/Sjc_0007218
map00260	Glycine, serine and threonine metabolism	17	-0.626857	-1.64799	0.0236778	0.185583	0.161669	2049	tags=65%, list=23%, signal=50%	Sjc_0004909/Sjc_0001024/Sjc_0003330/Sjc_0007761/Sjc_0006117/Sjc_0000785/Sjc_0009581/Sjc_0007032/Sjc_0000388/Sjc_0001315/Sjc_0002603
map05017	Spinocerebellar ataxia	78	-0.41821	-1.51522	0.0264745	0.202042	0.176008	2095	tags=46%, list=24%, signal=35%	Sjc_0005398/Sjc_0006912/Sjc_0005455/Sjc_0003511/Sjc_0005848/Sjc_0003147/Sjc_0004561/Sjc_0005246/Sjc_0000172/Sjc_0000227/Sjc_0001555/Sjc_0002578/Sjc_0009010/Sjc_0005456/Sjc_0006453/Sjc_0000969/Sjc_0003038/Sjc_0001299/Sjc_0009753/Sjc_0004294/Sjc_0006686/Sjc_0007209/Sjc_0003947/Sjc_0002570/Sjc_0009055/Sjc_0001467/Sjc_0000927/Sjc_0003851/Sjc_0008991/Sjc_0000859/Sjc_0001199/Sjc_0007462/Sjc_0006212/Sjc…
map04966	Collecting duct acid secretion	15	-0.649009	-1.66041	0.0282022	0.204466	0.178119	1610	tags=80%, list=18%, signal=65%	Sjc_0008111/Sjc_0008726/Sjc_0004620/Sjc_0001824/Sjc_0000770/Sjc_0008820/Sjc_0007951/Sjc_0004664/Sjc_0005299/Sjc_0002996/Sjc_0005874/Sjc_0007207
map00030	Pentose phosphate pathway	18	-0.600426	-1.61378	0.0276221	0.204466	0.178119	2334	tags=61%, list=27%, signal=45%	Sjc_0004648/Sjc_0007797/Sjc_0002746/Sjc_0001605/Sjc_0007119/Sjc_0006795/Sjc_0001169/Sjc_0000560/Sjc_0008801/Sjc_0007810/Sjc_0006464
map00250	Alanine, aspartate and glutamate metabolism	18	-0.595994	-1.60187	0.0321101	0.220533	0.192116	2624	tags=61%, list=30%, signal=43%	Sjc_0007056/Sjc_0004037/Sjc_0003109/Sjc_0007057/Sjc_0008550/Sjc_0007290/Sjc_0007445/Sjc_0008953/Sjc_0000416/Sjc_0002674/Sjc_0003316
map05120	Epithelial cell signaling in Helicobacter pylori infection	35	-0.510943	-1.59887	0.0330954	0.220533	0.192116	1610	tags=46%, list=18%, signal=37%	Sjc_0008726/Sjc_0004620/Sjc_0001824/Sjc_0008960/Sjc_0000770/Sjc_0008820/Sjc_0007951/Sjc_0004664/Sjc_0005299/Sjc_0002996/Sjc_0001730/Sjc_0002935/Sjc_0008547/Sjc_0008962/Sjc_0005874/Sjc_0007207
map03015	mRNA surveillance pathway	68	-0.409721	-1.46334	0.0326384	0.220533	0.192116	2813	tags=51%, list=32%, signal=35%	Sjc_0001721/Sjc_0008548/Sjc_0008830/Sjc_0009052/Sjc_0009504/Sjc_0009033/Sjc_0007760/Sjc_0006933/Sjc_0005993/Sjc_0006248/Sjc_0002953/Sjc_0000586/Sjc_0002406/Sjc_0000546/Sjc_0001128/Sjc_0007547/Sjc_0007645/Sjc_0002087/Sjc_0003898/Sjc_0002661/Sjc_0005333/Sjc_0007820/Sjc_0008814/Sjc_0000168/Sjc_0001052/Sjc_0008042/Sjc_0003467/Sjc_0006891/Sjc_0003762/Sjc_0004157/Sjc_0007194/Sjc_0008386/Sjc_0000508/Sjc…
map04140	Autophagy - animal	91	-0.38858	-1.45206	0.0334601	0.220533	0.192116	612	tags=14%, list=7%, signal=13%	Sjc_0003619/Sjc_0004839/Sjc_0002267/Sjc_0005160/Sjc_0002294/Sjc_0007073/Sjc_0000045/Sjc_0002273/Sjc_0002266/Sjc_0005470/Sjc_0005471/Sjc_0002295/Sjc_0002264
map00020	Citrate cycle (TCA cycle)	27	-0.521379	-1.52672	0.0388292	0.250233	0.217989	1136	tags=67%, list=13%, signal=58%	Sjc_0007686/Sjc_0004726/Sjc_0000077/Sjc_0007877/Sjc_0001539/Sjc_0002161/Sjc_0007190/Sjc_0009284/Sjc_0007032/Sjc_0005974/Sjc_0004570/Sjc_0005414/Sjc_0003021/Sjc_0007140/Sjc_0001724/Sjc_0003862/Sjc_0007876/Sjc_0000909
map05014	Amyotrophic lateral sclerosis (ALS)	17	0.683535	1.66434	0.0413007	0.260361	0.226812	7	tags=6%, list=0%, signal=6%	Sjc_0005244
map04932	Non-alcoholic fatty liver disease (NAFLD)	67	-0.403785	-1.44009	0.0421964	0.260361	0.226812	1656	tags=36%, list=19%, signal=29%	Sjc_0005540/Sjc_0003533/Sjc_0008345/Sjc_0005151/Sjc_0009445/Sjc_0002490/Sjc_0003094/Sjc_0001901/Sjc_0002400/Sjc_0007263/Sjc_0004929/Sjc_0009105/Sjc_0003792/Sjc_0006031/Sjc_0003281/Sjc_0008703/Sjc_0003862/Sjc_0005896/Sjc_0003280/Sjc_0006635/Sjc_0003043/Sjc_0001151/Sjc_0000909/Sjc_0005280
map05133	Pertussis	29	-0.514983	-1.52174	0.0448842	0.271176	0.236233	1293	tags=34%, list=15%, signal=30%	Sjc_0002001/Sjc_0001958/Sjc_0005481/Sjc_0006908/Sjc_0003767/Sjc_0009295/Sjc_0001959/Sjc_0003236/Sjc_0002903/Sjc_0009216
map04016	MAPK signaling pathway - plant	17	-0.58778	-1.54525	0.0475894	0.281652	0.245359	528	tags=47%, list=6%, signal=44%	Sjc_0003710/Sjc_0002004/Sjc_0005481/Sjc_0009295/Sjc_0003236/Sjc_0002903/Sjc_0008892/Sjc_0009216
map04916	Melanogenesis	57	0.57097	1.75735	0.0496818	0.288154	0.251024	124	tags=5%, list=1%, signal=5%	Sjc_0005796/Sjc_0005182/Sjc_0000994
map04721	Synaptic vesicle cycle	55	-0.428652	-1.47454	0.0625034	0.355411	0.309614	2627	tags=60%, list=30%, signal=42%	Sjc_0001637/Sjc_0009031/Sjc_0005786/Sjc_0001589/Sjc_0007089/Sjc_0006927/Sjc_0002417/Sjc_0009191/Sjc_0004793/Sjc_0001653/Sjc_0007977/Sjc_0009232/Sjc_0008111/Sjc_0007976/Sjc_0009315/Sjc_0008726/Sjc_0007723/Sjc_0004335/Sjc_0004620/Sjc_0009167/Sjc_0001590/Sjc_0001824/Sjc_0001288/Sjc_0000770/Sjc_0008820/Sjc_0007951/Sjc_0004664/Sjc_0005299/Sjc_0002996/Sjc_0008547/Sjc_0005874/Sjc_0007207/Sjc_0002129
map00983	Drug metabolism - other enzymes	25	-0.537093	-1.54562	0.0656913	0.355868	0.310012	1907	tags=44%, list=22%, signal=35%	Sjc_0006211/Sjc_0003710/Sjc_0001594/Sjc_0003914/Sjc_0007880/Sjc_0004169/Sjc_0001759/Sjc_0005120/Sjc_0002015/Sjc_0006542/Sjc_0008892
map05134	Legionellosis	19	-0.555606	-1.51818	0.0662651	0.355868	0.310012	1345	tags=53%, list=15%, signal=45%	Sjc_0000271/Sjc_0005700/Sjc_0007536/Sjc_0001711/Sjc_0003515/Sjc_0001080/Sjc_0001079/Sjc_0009697/Sjc_0000226/Sjc_0009689
map04910	Insulin signaling pathway	76	-0.387449	-1.40513	0.0661522	0.355868	0.310012	1335	tags=20%, list=15%, signal=17%	Sjc_0002490/Sjc_0001901/Sjc_0005481/Sjc_0009284/Sjc_0001934/Sjc_0002794/Sjc_0003810/Sjc_0002174/Sjc_0005661/Sjc_0009295/Sjc_0003236/Sjc_0002903/Sjc_0008642/Sjc_0007218/Sjc_0009216
map04080	Neuroactive ligand-receptor interaction	31	0.557359	1.53788	0.0734463	0.370405	0.322676	906	tags=32%, list=10%, signal=29%	Sjc_0004493/Sjc_0009245/Sjc_0006547/Sjc_0003309/Sjc_0009385/Sjc_0003380/Sjc_0006992/Sjc_0002355/Sjc_0009268/Sjc_0005454
map04320	Dorso-ventral axis formation	26	0.562194	1.48717	0.0758755	0.370405	0.322676	667	tags=23%, list=8%, signal=21%	Sjc_0004478/Sjc_0009713/Sjc_0007497/Sjc_0004081/Sjc_0004313/Sjc_0001709
map05020	Prion diseases	22	0.572143	1.47837	0.0766355	0.370405	0.322676	7	tags=5%, list=0%, signal=5%	Sjc_0005244
map05410	Hypertrophic cardiomyopathy (HCM)	35	-0.469354	-1.46873	0.0754717	0.370405	0.322676	2299	tags=49%, list=26%, signal=36%	Sjc_0000110/Sjc_0008822/Sjc_0005455/Sjc_0004498/Sjc_0001555/Sjc_0002490/Sjc_0005456/Sjc_0002001/Sjc_0001901/Sjc_0002140/Sjc_0003853/Sjc_0004497/Sjc_0001396/Sjc_0001112/Sjc_0001877/Sjc_0001878/Sjc_0008266
map04924	Renin secretion	57	-0.388007	-1.33359	0.0731132	0.370405	0.322676	900	tags=23%, list=10%, signal=21%	Sjc_0004497/Sjc_0002261/Sjc_0006908/Sjc_0009295/Sjc_0002267/Sjc_0003236/Sjc_0002294/Sjc_0002903/Sjc_0002273/Sjc_0002266/Sjc_0009216/Sjc_0002295/Sjc_0002264
map04024	cAMP signaling pathway	93	-0.353775	-1.32247	0.0741627	0.370405	0.322676	1690	tags=23%, list=19%, signal=18%	Sjc_0008162/Sjc_0006235/Sjc_0001280/Sjc_0001084/Sjc_0001555/Sjc_0005456/Sjc_0004304/Sjc_0005481/Sjc_0004497/Sjc_0001412/Sjc_0005238/Sjc_0006236/Sjc_0006908/Sjc_0009295/Sjc_0001877/Sjc_0003236/Sjc_0006237/Sjc_0002903/Sjc_0001878/Sjc_0009216/Sjc_0000190
map05412	Arrhythmogenic right ventricular cardiomyopathy (ARVC)	29	-0.485962	-1.43598	0.0814196	0.374789	0.326495	2001	tags=45%, list=23%, signal=35%	Sjc_0005455/Sjc_0004498/Sjc_0001555/Sjc_0005456/Sjc_0002001/Sjc_0005436/Sjc_0003853/Sjc_0004497/Sjc_0001396/Sjc_0001877/Sjc_0001878/Sjc_0002328/Sjc_0008266
map04922	Glucagon signaling pathway	61	-0.382645	-1.33503	0.0793269	0.374789	0.326495	1398	tags=28%, list=16%, signal=24%	Sjc_0006795/Sjc_0007314/Sjc_0002490/Sjc_0001901/Sjc_0005481/Sjc_0009284/Sjc_0001934/Sjc_0003810/Sjc_0000303/Sjc_0008801/Sjc_0005414/Sjc_0004045/Sjc_0003021/Sjc_0009295/Sjc_0003236/Sjc_0002903/Sjc_0009216
map05130	Pathogenic Escherichia coli infection	67	-0.372279	-1.32772	0.0801887	0.374789	0.326495	1494	tags=30%, list=17%, signal=25%	Sjc_0001836/Sjc_0003800/Sjc_0002001/Sjc_0001764/Sjc_0003853/Sjc_0006243/Sjc_0000111/Sjc_0006633/Sjc_0001730/Sjc_0007536/Sjc_0007994/Sjc_0001512/Sjc_0000747/Sjc_0002995/Sjc_0004461/Sjc_0001080/Sjc_0002000/Sjc_0001079/Sjc_0006694/Sjc_0008266
map04146	Peroxisome	18	0.598313	1.46725	0.0938124	0.410147	0.357297	7	tags=6%, list=0%, signal=6%	Sjc_0005244
map00680	Methane metabolism	12	-0.601373	-1.44534	0.0947581	0.410147	0.357297	2049	tags=67%, list=23%, signal=51%	Sjc_0004909/Sjc_0006117/Sjc_0000785/Sjc_0006795/Sjc_0008801/Sjc_0003353/Sjc_0004159/Sjc_0006464
map04216	Ferroptosis	19	-0.52576	-1.43663	0.0923695	0.410147	0.357297	3180	tags=68%, list=36%, signal=44%	Sjc_0007679/Sjc_0006470/Sjc_0005208/Sjc_0000273/Sjc_0002483/Sjc_0003243/Sjc_0001807/Sjc_0002905/Sjc_0004931/Sjc_0007424/Sjc_0007176/Sjc_0002242/Sjc_0000272
map05414	Dilated cardiomyopathy (DCM)	34	-0.451672	-1.38959	0.0926724	0.410147	0.357297	2308	tags=47%, list=26%, signal=35%	Sjc_0003175/Sjc_0000110/Sjc_0008822/Sjc_0005455/Sjc_0004498/Sjc_0001555/Sjc_0005456/Sjc_0002001/Sjc_0002140/Sjc_0003853/Sjc_0004497/Sjc_0001396/Sjc_0001112/Sjc_0001877/Sjc_0001878/Sjc_0008266
map00071	Fatty acid degradation	12	-0.5772	-1.38725	0.100806	0.417141	0.36339	2590	tags=67%, list=29%, signal=47%	Sjc_0005217/Sjc_0003243/Sjc_0001807/Sjc_0002905/Sjc_0009249/Sjc_0002862/Sjc_0005699/Sjc_0003353
map04670	Leukocyte transendothelial migration	38	-0.428509	-1.37123	0.102128	0.417141	0.36339	2088	tags=42%, list=24%, signal=32%	Sjc_0001150/Sjc_0000979/Sjc_0003426/Sjc_0003511/Sjc_0001474/Sjc_0007498/Sjc_0008143/Sjc_0001280/Sjc_0002001/Sjc_0005436/Sjc_0003038/Sjc_0003853/Sjc_0001730/Sjc_0001412/Sjc_0006908/Sjc_0008266
map04530	Tight junction	84	-0.350195	-1.28626	0.101896	0.417141	0.36339	2659	tags=40%, list=30%, signal=29%	Sjc_0008830/Sjc_0004802/Sjc_0000338/Sjc_0009052/Sjc_0009504/Sjc_0008847/Sjc_0006780/Sjc_0006693/Sjc_0000979/Sjc_0004680/Sjc_0002953/Sjc_0003426/Sjc_0004498/Sjc_0007743/Sjc_0001474/Sjc_0007586/Sjc_0008143/Sjc_0001280/Sjc_0003651/Sjc_0008878/Sjc_0009184/Sjc_0007280/Sjc_0002490/Sjc_0003824/Sjc_0009149/Sjc_0002001/Sjc_0001901/Sjc_0008261/Sjc_0003853/Sjc_0004497/Sjc_0007994/Sjc_0008877/Sjc_0006694/Sjc…
map05225	Hepatocellular carcinoma	75	-0.354442	-1.28552	0.100703	0.417141	0.36339	1204	tags=21%, list=14%, signal=19%	Sjc_0005436/Sjc_0008960/Sjc_0003038/Sjc_0003853/Sjc_0002948/Sjc_0005859/Sjc_0004169/Sjc_0002935/Sjc_0008962/Sjc_0000647/Sjc_0005808/Sjc_0002015/Sjc_0006542/Sjc_0009316/Sjc_0002328/Sjc_0008266
map04213	Longevity regulating pathway - multiple species	34	0.504791	1.42609	0.113383	0.453151	0.39476	37	tags=6%, list=0%, signal=6%	Sjc_0005244/Sjc_0001349
map04136	Autophagy - other	22	-0.488166	-1.35488	0.115632	0.453151	0.39476	3487	tags=68%, list=40%, signal=41%	Sjc_0007251/Sjc_0007965/Sjc_0007213/Sjc_0006083/Sjc_0006470/Sjc_0009026/Sjc_0009052/Sjc_0005965/Sjc_0004271/Sjc_0005398/Sjc_0001754/Sjc_0008232/Sjc_0001062/Sjc_0002146/Sjc_0007073
map05131	Shigellosis	91	-0.339728	-1.26951	0.114754	0.453151	0.39476	2511	tags=40%, list=29%, signal=29%	Sjc_0006780/Sjc_0001150/Sjc_0005335/Sjc_0004944/Sjc_0005251/Sjc_0000979/Sjc_0002681/Sjc_0006661/Sjc_0005398/Sjc_0001406/Sjc_0008232/Sjc_0001474/Sjc_0007498/Sjc_0008143/Sjc_0001280/Sjc_0001084/Sjc_0005051/Sjc_0002146/Sjc_0001836/Sjc_0009025/Sjc_0002835/Sjc_0003800/Sjc_0002001/Sjc_0008960/Sjc_0003853/Sjc_0007536/Sjc_0002935/Sjc_0000868/Sjc_0008962/Sjc_0000747/Sjc_0000867/Sjc_0005239/Sjc_0001080/Sjc…
map04217	Necroptosis	31	-0.428331	-1.28245	0.121019	0.467941	0.407643	1987	tags=42%, list=23%, signal=33%	Sjc_0004931/Sjc_0007424/Sjc_0005113/Sjc_0008774/Sjc_0000225/Sjc_0003590/Sjc_0003810/Sjc_0002242/Sjc_0008207/Sjc_0002580/Sjc_0005748/Sjc_0000224/Sjc_0003316
map04512	ECM-receptor interaction	14	-0.53428	-1.32944	0.130081	0.478453	0.416801	1877	tags=64%, list=21%, signal=51%	Sjc_0003858/Sjc_0006166/Sjc_0002001/Sjc_0001926/Sjc_0000684/Sjc_0005376/Sjc_0007106/Sjc_0000685/Sjc_0000598
map03018	RNA degradation	49	-0.379467	-1.27873	0.130337	0.478453	0.416801	1896	tags=29%, list=22%, signal=23%	Sjc_0004735/Sjc_0007161/Sjc_0007778/Sjc_0003709/Sjc_0006795/Sjc_0007896/Sjc_0005700/Sjc_0005157/Sjc_0008801/Sjc_0004157/Sjc_0005111/Sjc_0004159/Sjc_0007431/Sjc_0003578
map04151	PI3K-Akt signaling pathway	89	-0.33497	-1.24619	0.128505	0.478453	0.416801	2014	tags=36%, list=23%, signal=28%	Sjc_0004692/Sjc_0007416/Sjc_0004771/Sjc_0001754/Sjc_0003511/Sjc_0002583/Sjc_0006166/Sjc_0007942/Sjc_0002876/Sjc_0009372/Sjc_0002490/Sjc_0005082/Sjc_0002001/Sjc_0000225/Sjc_0008960/Sjc_0001926/Sjc_0003038/Sjc_0009284/Sjc_0008341/Sjc_0002997/Sjc_0002935/Sjc_0000684/Sjc_0008962/Sjc_0005661/Sjc_0001667/Sjc_0005376/Sjc_0000938/Sjc_0007106/Sjc_0000685/Sjc_0000940/Sjc_0000224/Sjc_0007218
map04020	Calcium signaling pathway	79	-0.339838	-1.23606	0.128806	0.478453	0.416801	2001	tags=37%, list=23%, signal=29%	Sjc_0005455/Sjc_0004931/Sjc_0007274/Sjc_0004498/Sjc_0003511/Sjc_0006235/Sjc_0001084/Sjc_0003618/Sjc_0001555/Sjc_0005072/Sjc_0005456/Sjc_0005481/Sjc_0008960/Sjc_0003038/Sjc_0001934/Sjc_0004497/Sjc_0001396/Sjc_0002935/Sjc_0008962/Sjc_0006236/Sjc_0009295/Sjc_0002580/Sjc_0001877/Sjc_0003236/Sjc_0006237/Sjc_0002903/Sjc_0001878/Sjc_0009216/Sjc_0008678
map05145	Toxoplasmosis	24	-0.463409	-1.316	0.138655	0.497316	0.433233	621	tags=21%, list=7%, signal=19%	Sjc_0006908/Sjc_0009697/Sjc_0000226/Sjc_0008678/Sjc_0009689
map04744	Phototransduction	17	-0.499922	-1.31428	0.143145	0.497316	0.433233	1167	tags=35%, list=13%, signal=31%	Sjc_0005481/Sjc_0002997/Sjc_0009295/Sjc_0003236/Sjc_0002903/Sjc_0009216
map00270	Cysteine and methionine metabolism	17	-0.499797	-1.31395	0.143145	0.497316	0.433233	2542	tags=71%, list=29%, signal=50%	Sjc_0007706/Sjc_0007686/Sjc_0002483/Sjc_0001024/Sjc_0008550/Sjc_0002609/Sjc_0002144/Sjc_0007290/Sjc_0007176/Sjc_0004045/Sjc_0002589/Sjc_0001724
map04260	Cardiac muscle contraction	37	-0.405192	-1.28767	0.140756	0.497316	0.433233	2299	tags=49%, list=26%, signal=36%	Sjc_0000110/Sjc_0008822/Sjc_0005455/Sjc_0004498/Sjc_0008039/Sjc_0001555/Sjc_0003533/Sjc_0008345/Sjc_0005456/Sjc_0004304/Sjc_0003792/Sjc_0004497/Sjc_0001396/Sjc_0003281/Sjc_0005896/Sjc_0001877/Sjc_0003043/Sjc_0001878
map04727	GABAergic synapse	29	-0.430237	-1.27132	0.14405	0.497316	0.433233	1981	tags=52%, list=23%, signal=40%	Sjc_0006927/Sjc_0001653/Sjc_0007416/Sjc_0004771/Sjc_0004498/Sjc_0003511/Sjc_0008232/Sjc_0009315/Sjc_0002146/Sjc_0002876/Sjc_0003038/Sjc_0002997/Sjc_0004497/Sjc_0006908/Sjc_0003316
