# Supplementary material for: Dynamic single-cell transcriptomics reveals lsamp-guided neural network formation in male S. japonicum driving female reproduction
Source: Research Square preprint supplement (doi:10.21203/rs.3.rs-6983189/v1), 2025-07-10
Supplement: Supplementary file 4 [file 23a909ba4953ded840ee58cc.xlsx]

## Sheet: Sheet1
Table S11. Downregulated genes in lsamp RNAi vs. gfp RNAi males of S. japonicum.
Gene ID	stat	pvalue	padj	Annotation
Sjc-0000373	-18.6383	1.57124e-77	1.22117e-73	Similar to sax-3: Protein sax-3
Sjc-0001388	-7.00212	2.52111e-12	9.79705e-09	Similar to Cbr1: Carbonyl reductase [NADPH] 1
Sjc-0008085	-5.60015	2.14172e-08	2.08069e-05	Protein of unknown function
Sjc-0009314	-5.30844	1.10565e-07	7.81191e-05	NEM-sensitive fusion protein 2
Sjc-0000045	-4.67119	2.9946e-06	0.00145463	Similar to Cat-1: Cathepsin L-like proteinase
Sjc-0006600	-4.62185	3.80329e-06	0.00157352	Similar to Putative acyl-CoA-binding protein
Sjc-0000226	-4.56689	4.95008e-06	0.0019236	Similar to Heat shock 70 kDa protein homolog
Sjc-0001955	-4.49977	6.80263e-06	0.00251762	DM9 domain-containing protein
Sjc-0007970	-4.43469	9.22046e-06	0.00266531	Similar to SNRPN: Small nuclear ribonucleoprotein-associated protein N
Sjc-0003557	-4.35558	1.32713e-05	0.0035567	dystrophins A:C:F:G:H
Sjc-0005925	-4.3602	1.29944e-05	0.0035567	Similar to Rnf10: RING finger protein 10
Sjc-0000897	-4.33971	1.42671e-05	0.00364739	Similar to Probable dynein light chain
Sjc-0005509	-4.32725	1.50984e-05	0.00365188	Similar to SNRPC: U1 small nuclear ribonucleoprotein C
Sjc-0007218	-4.3148	1.59744e-05	0.00365188	Similar to Eif4e1b: Eukaryotic translation initiation factor 4E type 1B
Sjc-0002975	-4.26775	1.97454e-05	0.00414761	Similar to Dynein light chain LC6%2C flagellar outer arm
Sjc-0004714	-4.21289	2.52127e-05	0.00502443	Similar to Nascent polypeptide-associated complex subunit alpha
Sjc-0004815	-4.18414	2.86249e-05	0.00556182	Similar to 60S acidic ribosomal protein P2
Sjc-0002603	-4.16354	3.13352e-05	0.00579851	Similar to ilvA: L-threonine dehydratase biosynthetic IlvA
Sjc-0003356	-4.12373	3.72784e-05	0.00658472	Similar to KHDRBS3: KH domain-containing%2C RNA-binding%2C signal transduction-associated protein 3
Sjc-0002129	-4.07305	4.64017e-05	0.00801409	Similar to VAMP3: Vesicle-associated membrane protein 3
Sjc-0008511	-4.05834	4.94226e-05	0.00835026	Similar to Anxa10: Annexin A10
Sjc-0005029	-4.02588	5.67625e-05	0.00877597	Protein of unknown function
Sjc-0009486	-4.00328	6.24691e-05	0.00916057	Similar to RPS21: 40S ribosomal protein S21
Sjc-0008014	-3.95598	7.62231e-05	0.0102139	hypothetical protein
Sjc-0000614	-3.93817	8.21038e-05	0.0102444	Similar to Major egg antigen
Sjc-0002573	-3.90019	9.61165e-05	0.0102444	Similar to GPD1L: Glycerol-3-phosphate dehydrogenase 1-like protein
Sjc-0005280	-3.89973	9.63016e-05	0.0102444	Similar to NDUFA13: NADH dehydrogenase [ubiquinone] 1 alpha subcomplex subunit 13
Sjc-0004805	-3.88014	0.000104396	0.0105372	SJCHGC02284 protein
Sjc-0005644	-3.88182	0.000103676	0.0105372	SJCHGC07500 protein
Sjc-0001266	-3.86753	0.000109944	0.0107759	hypothetical protein
Sjc-0003139	-3.78831	0.000151678	0.0133337	Similar to Coq7: 5-demethoxyubiquinone hydroxylase%2C mitochondrial
Sjc-0002110	-3.74262	0.000182114	0.0153847	Similar to RPL23A: 60S ribosomal protein L23a
Sjc-0001066	-3.71512	0.000203109	0.0156988	Similar to Rpl35: 60S ribosomal protein L35
Sjc-0002032	-3.70866	0.000208355	0.0156988	Protein of unknown function
Sjc-0002632	-3.72479	0.000195478	0.0156988	hypothetical protein D915_000600
Sjc-0001346	-3.63585	0.000277064	0.0177302	Similar to srsf1b: Serine/arginine-rich splicing factor 1B
Sjc-0005729	-3.63324	0.000279887	0.0177302	Dysferlin
Sjc-0003559	-3.60877	0.000307647	0.0186799	Similar to UTRN: Utrophin
Sjc-0001560	-3.53834	0.00040265	0.0212524	Similar to CHCHD10: Coiled-coil-helix-coiled-coil-helix domain-containing protein 10%2C mitochondrial
Sjc-0002499	-3.54289	0.000395767	0.0212524	Similar to SOD: Superoxide dismutase [Cu-Zn]
Sjc-0008135	-3.47306	0.000514569	0.0251936	Similar to UPF0183 protein C16orf70 homolog
Sjc-0002649	-3.37412	0.000740527	0.03087	Glycoside hydrolase subgroup catalytic core
Sjc-0003420	-3.31439	0.000918434	0.0347199	Protein VHS3
Sjc-0008573	-3.2904	0.00100045	0.0353431	hypothetical protein Smp_174500
Sjc-0002775	-3.26775	0.00108405	0.0369682	Similar to gar1: H/ACA ribonucleoprotein complex subunit 1
Sjc-0004921	-3.26755	0.00108481	0.0369682	Unconventional myosin-XVIIIa
Sjc-0005219	-3.24085	0.00119174	0.0381533	hypotheticial protein
Sjc-0000157	-3.20409	0.0013549	0.0405192	Similar to RpS25: 40S ribosomal protein S25
Sjc-0002936	-3.13899	0.0016953	0.0465578	SJCHGC09717 protein
Sjc-0004860	-3.13435	0.00172234	0.0466411	Transmembrane protein 131
