# Supplementary material for: Dynamic single-cell transcriptomics reveals lsamp-guided neural network formation in male S. japonicum driving female reproduction
Source: Research Square preprint supplement (doi:10.21203/rs.3.rs-6983189/v1), 2025-07-10
Supplement: Supplementary file 5 [file 2c36d30ff968ba362b6a277e.xlsx]

## Sheet: Sheet1
Table S7. Highly expressed genes in female gametogenesis in S. japonicum.
gene	pval	qval	range_pr	Gene_Name	Annotation	cluster
Sjc-0006069	1.79093e-73	9.7687e-72	2.04571	SJC_0006069	SJCHGC03511 protein	C1
Sjc-0008819	5.68279e-66	2.50711e-64	1.60633	CD163	Similar to CD163: Scavenger receptor cysteine-rich type 1 protein M130	C1
Sjc-0003683	9.88068e-55	3.12022e-53	2.19907	MPEG1	hypothetical transcript	C1
Sjc-0006860	4.75855e-53	1.4567e-51	2.24944	HIST1H1A	Similar to Histone H1%2C early embryonic	C1
Sjc-0003454	9.44578e-29	1.638e-27	1.1803	IAP1	inhibitor of apoptosis protein	C1
Sjc-0000320	6.17067e-28	1.04588e-26	1.35021	SLC30A7	Centrosomal protein	C1
Sjc-0005551	3.80409e-27	6.23622e-26	1.09601	RIIAD1	RIIa domain-containing protein 1	C1
Sjc-0001279	9.6342e-23	1.41679e-21	1.17069	MSRB	Similar to msrB: Peptide methionine sulfoxide reductase MsrB	C1
Sjc-0009220	4.03623e-22	5.79363e-21	1.64956	ELED	Hoglet	C1
Sjc-0003753	1.02e-21	1.41666e-20	1.21394	ARID4B	Similar to Arid4a: AT-rich interactive domain-containing protein 4A	C1
Sjc-0004974	8.39295e-21	1.1092e-19	0.985331	CDC7	Similar to CDC7: Cell division cycle 7-related protein kinase	C1
Sjc-0005264	1.07586e-20	1.4156e-19	1.24661	CCNB2	Similar to ccnb2: G2/mitotic-specific cyclin-B2	C1
Sjc-0006211	6.47049e-20	8.2252e-19	1.03067	RRM1	Similar to Rrm1: Ribonucleoside-diphosphate reductase large subunit	C1
Sjc-0001562	1.17525e-18	1.41597e-17	0.955279	ALDH9A1	Similar to aldh9a1a: Aldehyde dehydrogenase family 9 member A1-A	C1
Sjc-0008888	1.60824e-18	1.91457e-17	1.03314	IFT27	Similar to IFT27: Intraflagellar transport protein 27 homolog	C1
Sjc-0000961	7.1643e-18	8.33058e-17	0.985693	SCLT1	sodium channel and clathrin linker 1-like	C1
Sjc-0006446	8.44887e-18	9.78634e-17	0.808123	RASSF1	Ras association domain-containing protein	C1
Sjc-0009495	1.9971e-17	2.30435e-16	0.904143	SJC_0009495	SJCHGC06944 protein	C1
Sjc-0009231	5.42757e-17	6.05305e-16	1.68451	BOLL	Similar to BOLL: Protein boule-like	C1
Sjc-0008469	1.63673e-16	1.77263e-15	1.08964	LIN-53	Similar to RBBP4: Histone-binding protein RBBP4	C1
Sjc-0004400	3.91624e-16	4.16621e-15	0.883612	NCAPD2	Similar to ncapd2: Condensin complex subunit 1	C1
Sjc-0008006	1.80442e-15	1.86664e-14	0.982887	PRC1	Similar to PRC1: Protein regulator of cytokinesis 1	C1
Sjc-0009498	2.34631e-15	2.40237e-14	0.775689	SJC_0009498	SJCHGC05739 protein	C1
Sjc-0004241	3.1558e-14	3.06388e-13	0.749728	RRP1	Similar to Apex1: DNA-	C1
Sjc-0004679	4.83374e-14	4.64782e-13	0.975152	EXC-4	Similar to exc-4: Chloride intracellular channel exc-4	C1
Sjc-0009013	6.00902e-14	5.7411e-13	0.729422	BPNT1	Similar to Bpnt1: 3'	C1
Sjc-0001603	6.53317e-14	6.18281e-13	0.774559	MORF4L1	Similar to Morf4l1: Mortality factor 4-like protein 1	C1
Sjc-0009376	9.9675e-14	9.25774e-13	0.680559	SJC_0009376	hypothetical protein	C1
Sjc-0003677	1.16156e-13	1.07552e-12	0.861444	SNF8	Similar to snf8: Vacuolar-sorting protein SNF8	C1
Sjc-0005522	1.95647e-13	1.79492e-12	0.730579	LIN9	Similar to LIN9: Protein lin-9 homolog	C1
Sjc-0002169	2.89788e-13	2.6107e-12	0.82332	SJC_0002169	SJCHGC06330 protein	C1
Sjc-0000601	4.49165e-13	3.97491e-12	0.763884	SJC_0000601	hypothetical protein	C1
Sjc-0000255	4.73315e-13	4.17631e-12	0.8719	SJC_0000255	retinal guanylyl cyclase 2	C1
Sjc-0002829	5.97191e-13	5.23852e-12	0.781214	DNAJB13	Similar to Dnajb13: DnaJ homolog subfamily B member 13	C1
Sjc-0006025	1.26133e-12	1.08114e-11	0.846451	DHS-21	Similar to dhs-21: L-xylulose reductase	C1
Sjc-0001337	1.63619e-12	1.39845e-11	0.882285	RFC4	Similar to Rfc2: Replication factor C subunit 2	C1
Sjc-0004521	6.55929e-12	5.33275e-11	0.694465	ZNRD1	Similar to ZNRD1: DNA-directed RNA polymerase I subunit RPA12	C1
Sjc-0000479	7.85273e-12	6.33284e-11	0.797738	SJC_0000479	Epa2p-like protein	C1
Sjc-0000941	8.0451e-12	6.47059e-11	0.781025	NDUFS2	Similar to Ndufs2: NADH dehydrogenase [ubiquinone] iron-sulfur protein 2%2C mitochondrial	C1
Sjc-0002044	1.44622e-11	1.14175e-10	0.734015	SJC_0002044	SJCHGC05666 protein	C1
Sjc-0002616	1.89906e-11	1.46835e-10	0.637018	SKIV2L	Similar to SKIV2L: Helicase SKI2W	C1
Sjc-0006758	2.1429e-11	1.65262e-10	0.770537	DDX47	Similar to DDX47: Probable ATP-dependent RNA helicase DDX47	C1
Sjc-0007256	2.98629e-11	2.29127e-10	0.655259	VPS37B	Similar to VPS37B: Vacuolar protein sorting-associated protein 37B	C1
Sjc-0002427	4.07216e-11	3.09278e-10	0.729714	MED18	Similar to med18: Mediator of RNA polymerase II transcription subunit 18	C1
Sjc-0008450	7.79274e-11	5.75819e-10	0.691516	C21ORF59	Similar to CFAP298: Cilia- and flagella-associated protein 298	C1
Sjc-0005590	1.05197e-10	7.73504e-10	0.585525	CACNA2D3	Similar to Cacna2d3: Voltage-dependent calcium channel subunit alpha-2/delta-3	C1
Sjc-0005425	1.57752e-10	1.14038e-09	0.758023	PKM	Similar to PyK: Pyruvate kinase	C1
Sjc-0004396	2.23086e-10	1.58968e-09	0.621817	SJC_0004396	SJCHGC01055 protein	C1
Sjc-0009502	2.31359e-10	1.64085e-09	0.572087	SJC_0009502	CDS22316.1 expressed conserved protein	C1
Sjc-0000747	2.38483e-10	1.68738e-09	0.714142	ARPC4	Similar to arpc4: Actin-related protein 2/3 complex subunit 4	C1
Sjc-0006154	2.39077e-10	1.6876e-09	0.80311	F58A4.6	expressed conserved protein	C1
Sjc-0001619	2.71706e-10	1.91342e-09	0.772559	PPM1B	Similar to PPM1A: Protein phosphatase 1A	C1
Sjc-0007142	2.98621e-10	2.07857e-09	0.686994	STK38	Similar to STK38L: Serine/threonine-protein kinase 38-like	C1
Sjc-0005862	3.26469e-10	2.26191e-09	0.923967	SJC_0005862	Antigen KI-67	C1
Sjc-0007403	8.50893e-10	5.76225e-09	0.667556	KIF23	Similar to KIF23: Kinesin-like protein KIF23	C1
Sjc-0006149	8.90814e-10	6.00549e-09	0.682075	SJC_0006149	DNA replication complex GINS protein SLD5	C1
Sjc-0008980	1.10984e-09	7.43194e-09	0.638752	PDXK	Similar to Pdxk: Pyridoxal kinase	C1
Sjc-0006587	1.14003e-09	7.61715e-09	0.553162	INSIG1	Similar to insig1: Insulin-induced gene 1 protein	C1
Sjc-0005414	1.17642e-09	7.84279e-09	0.759766	PDHB	Similar to pdhb-1: Pyruvate dehydrogenase E1 component subunit beta%2C mitochondrial	C1
Sjc-0004786	2.696e-09	1.7698e-08	0.705982	RPA1	Similar to RPA1: Replication protein A 70 kDa DNA-binding subunit	C1
Sjc-0007395	2.79257e-09	1.82521e-08	0.591655	PIK3C3	Similar to Pik3c3: Phosphatidylinositol 3-kinase catalytic subunit type 3	C1
Sjc-0007871	3.6634e-09	2.36858e-08	0.592009	TRAPPC3	Similar to TRAPPC3: Trafficking protein particle complex subunit 3	C1
Sjc-0001222	4.58458e-09	2.93257e-08	0.634012	ZNF235	Similar to ZNF235: Zinc finger protein 235	C1
Sjc-0009043	4.67154e-09	2.98183e-08	0.7081	SPR	Similar to Spr: Sepiapterin reductase	C1
Sjc-0006441	4.78716e-09	3.04915e-08	0.581511	SJC_0006441	hypothetical protein	C1
Sjc-0007330	5.87459e-09	3.68698e-08	0.64896	CCDC101	Similar to SGF29: SAGA-associated factor 29	C1
Sjc-0006244	6.8216e-09	4.22827e-08	0.694058	BARD1	Similar to BARD1: BRCA1-associated RING domain protein 1	C1
Sjc-0005309	1.2437e-08	7.46217e-08	0.554227	PRDX2	Similar to Prdx2: Peroxiredoxin-2	C1
Sjc-0005417	2.2055e-08	1.2999e-07	0.616777	MXD1	Mxi neural development protein	C1
Sjc-0004783	2.32618e-08	1.36567e-07	0.622213	SJC_0004783	SJCHGC06129 protein	C1
Sjc-0008345	2.58458e-08	1.50266e-07	0.621435	UQCRC2	Cytochrome b-c1 complex subunit 2 mitochondrial	C1
Sjc-0001067	2.62781e-08	1.5219e-07	0.740573	PLK1	Similar to Plk1: Serine/threonine-protein kinase PLK1	C1
Sjc-0001437	3.67186e-08	2.08628e-07	0.558433	ATG16L1	Similar to ATG16L1: Autophagy-related protein 16-1	C1
Sjc-0003631	3.73786e-08	2.11577e-07	0.536441	KANK3	Similar to Kank3: KN motif and ankyrin repeat domain-containing protein 3	C1
Sjc-0004665	5.16857e-08	2.86083e-07	0.61632	CTBP1	Similar to CtBP: C-terminal-binding protein	C1
Sjc-0008317	6.05887e-08	3.30484e-07	0.579959	SJC_0008317	cement precursor protein 3B variant 1, putative	C1
Sjc-0006184	7.30359e-08	3.95501e-07	0.682175	SMARCA5	Similar to Smarca5: SWI/SNF-related matrix-associated actin-dependent regulator of chromatin subfamily A member 5	C1
Sjc-0001964	8.29486e-08	4.4596e-07	0.564918	E2F4	Similar to E2F4: Transcription factor E2F4	C1
Sjc-0002988	9.897e-08	5.2831e-07	0.53721	PDE12	Similar to Pde12: 2'%2C5'-phosphodiesterase 12	C1
Sjc-0004800	1.3891e-07	7.32389e-07	0.608383	SJC_0004800	NADH dehydrogenase [ubiquinone] 1 beta subcomplex subunit 11 mitochondrial	C1
Sjc-0008260	1.46289e-07	7.68594e-07	0.621822	MPV17L2	Similar to mpv17l2: Mpv17-like protein 2	C1
Sjc-0008687	1.70114e-07	8.82943e-07	0.633638	TXLNB	Similar to TXLNB: Beta-taxilin	C1
Sjc-0008496	2.01893e-07	1.03535e-06	0.589308	MAD1L1	Similar to Mad1l1: Mitotic spindle assembly checkpoint protein MAD1	C1
Sjc-0001740	2.09325e-07	1.0698e-06	0.563672	PIK3CA	Similar to PIK3CA: Phosphatidylinositol 4%2C5-bisphosphate 3-kinase catalytic subunit alpha isoform	C1
Sjc-0008748	2.27393e-07	1.1582e-06	0.691715	PARP1	Similar to Parp1: Poly [ADP-ribose] polymerase 1	C1
Sjc-0002579	2.31986e-07	1.17959e-06	0.578073	DDX1	Similar to DDX1: ATP-dependent RNA helicase DDX1	C1
Sjc-0007305	2.64072e-07	1.33145e-06	0.634283	OSTC	Similar to ostc-a: Oligosaccharyltransferase complex subunit ostc-A	C1
Sjc-0007046	3.24731e-07	1.62636e-06	0.552683	SJC_0007046	Nuclear receptor coactivator 2	C1
Sjc-0007182	3.65408e-07	1.824e-06	0.647971	DDX5	Similar to DDX5: Probable ATP-dependent RNA helicase DDX5	C1
Sjc-0003862	4.36898e-07	2.1514e-06	0.622089	SDHA	Similar to sdha-b: Succinate dehydrogenase [ubiquinone] flavoprotein subunit B%2C mitochondrial	C1
Sjc-0006402	4.37452e-07	2.1514e-06	0.553489	ABT1	Similar to Abt1: Activator of basal transcription 1	C1
Sjc-0008297	4.4404e-07	2.18023e-06	0.605436	PDCD6	Similar to Sorcin	C1
Sjc-0000091	5.27639e-07	2.57804e-06	0.575314	RANGAP1	Similar to Rangap1: Ran GTPase-activating protein 1	C1
Sjc-0001146	7.66467e-07	3.67904e-06	0.559235	SJC_0001146	SJCHGC02387 protein	C1
Sjc-0003819	8.32534e-07	3.97075e-06	0.671607	DYNLT1	Similar to Dynlt1: Dynein light chain Tctex-type 1	C1
Sjc-0004201	9.14454e-07	4.35454e-06	0.56949	RDH12	Similar to RDH12: Retinol dehydrogenase 12	C1
Sjc-0002043	9.76982e-07	4.63757e-06	0.653022	YBX2	Similar to YBX3: Y-box-binding protein 3	C1
Sjc-0001063	1.10538e-06	5.18971e-06	0.663197	XPO1	Similar to Xpo1: Exportin-1	C1
Sjc-0001226	1.59357e-06	7.30994e-06	0.599237	ZNHIT2	Zinc finger HIT domain-containing protein 2	C1
Sjc-0005093	2.21483e-06	9.96174e-06	0.555825	LAP-2	Similar to lap-2: Putative aminopeptidase W07G4.4	C1
Sjc-0003720	4.98789e-22	7.05833e-21	0.897609	FHOD1	Similar to FHOD3: FH1/FH2 domain-containing protein 3	C2
Sjc-0005982	1.46297e-21	1.99496e-20	0.943806	SCOC	Similar to SCOC: Short coiled-coil protein	C2
Sjc-0009371	3.45403e-21	4.64667e-20	1.42442	NARS	Similar to NARS: Asparagine--tRNA ligase%2C cytoplasmic	C2
Sjc-0007744	5.38813e-19	6.57089e-18	0.933409	CALPB	Similar to CalpB: Calpain-B	C2
Sjc-0004059	5.91899e-17	6.55238e-16	1.03494	DNAJC12	Similar to dnaJ: Chaperone protein DnaJ	C2
Sjc-0004909	1.15526e-16	1.26029e-15	0.92952	PSPH	Similar to aay: Phosphoserine phosphatase	C2
Sjc-0003078	1.47488e-15	1.53101e-14	1.31295	SJC_0003078	hypothetical protein	C2
Sjc-0007077	1.07225e-14	1.06869e-13	1.20676	SJC_0007077	hypothetical protein	C2
Sjc-0000468	1.33718e-14	1.32394e-13	1.04757	STOML2	Similar to Stoml2: Stomatin-like protein 2%2C mitochondrial	C2
Sjc-0006131	4.64069e-14	4.47655e-13	1.02646	SRP19	Similar to Srp19: Signal recognition particle 19 kDa protein	C2
Sjc-0007969	1.7118e-13	1.57527e-12	1.02256	PDCD6	Similar to Sorcin	C2
Sjc-0003913	4.81416e-13	4.23533e-12	0.680258	VAMP8	Similar to VAMP7: Vesicle-associated membrane protein 7	C2
Sjc-0001378	8.12904e-13	7.0483e-12	0.933253	PSMG2	Similar to psmg2: Proteasome assembly chaperone 2	C2
Sjc-0005478	5.16722e-12	4.22388e-11	0.986362	PGK	Similar to PGK: Phosphoglycerate kinase	C2
Sjc-0001658	1.23204e-11	9.75228e-11	1.07315	COPZ1	Similar to COPZ1: Coatomer subunit zeta-1	C2
Sjc-0005085	1.50821e-11	1.18446e-10	0.948947	PFDN2	Similar to Pfdn2: Prefoldin subunit 2	C2
Sjc-0004983	1.44546e-10	1.04743e-09	0.899726	SEC61B	Similar to SEC61B: Protein transport protein Sec61 subunit beta	C2
Sjc-0005914	8.95752e-10	6.02524e-09	0.907236	EEF2	Similar to EF2: Elongation factor 2	C2
Sjc-0005095	1.04181e-09	6.99199e-09	0.789	TM2D2	Similar to TM2D2: TM2 domain-containing protein 2	C2
Sjc-0009492	1.7824e-09	1.1804e-08	0.745786	RAB11A	Similar to RAB11A: Ras-related protein Rab-11A	C2
Sjc-0005631	1.04623e-08	6.35361e-08	0.80983	AKR1B1	Similar to AKR1B1: Aldo-keto reductase family 1 member B1	C2
Sjc-0002109	2.91443e-08	1.68464e-07	0.656425	TARS	Similar to Tars: Threonine--tRNA ligase%2C cytoplasmic	C2
Sjc-0003226	2.98857e-08	1.72417e-07	0.583864	TPH2	Similar to Tph2: Tryptophan 5-hydroxylase 2	C2
Sjc-0005669	4.05259e-08	2.2896e-07	0.779835	SJC_0005669	SJCHGC02665 protein	C2
Sjc-0009735	4.36558e-08	2.44342e-07	0.528558	AMET_2288	Similar to Amet_2288: dTTP/UTP pyrophosphatase	C2
Sjc-0001764	4.93224e-08	2.74013e-07	0.750022	BAI	Similar to TMED10: Transmembrane emp24 domain-containing protein 10	C2
Sjc-0005516	5.19533e-08	2.87035e-07	0.708863	SJC_0005516	SJCHGC06678 protein	C2
Sjc-0008561	6.25572e-08	3.40602e-07	0.694698	FAM96B	Similar to AE7: Protein AE7	C2
Sjc-0000037	9.3848e-08	5.01861e-07	0.556308	BAG4	Similar to WWP2: NEDD4-like E3 ubiquitin-protein ligase WWP2	C2
Sjc-0001621	1.03469e-07	5.50369e-07	0.620389	AP1S2	Similar to AP1S2: AP-1 complex subunit sigma-2	C2
Sjc-0004740	1.30523e-07	6.90598e-07	0.661202	LTA4H	Similar to Lta4h: Leukotriene A-4 hydrolase	C2
Sjc-0002746	1.33058e-07	7.02772e-07	0.578867	GPI	Similar to GPI: Glucose-6-phosphate isomerase	C2
Sjc-0009354	1.51485e-07	7.90354e-07	0.59462	REEP6	Similar to Reep6: Receptor expression-enhancing protein 6	C2
Sjc-0002006	1.71551e-07	8.88866e-07	0.72798	TBCB	Similar to tbcb-1: Tubulin-specific chaperone B	C2
Sjc-0004474	1.84369e-07	9.50524e-07	0.618705	LET-767	Similar to HSD17B12: Very-long-chain 3-oxoacyl-CoA reductase	C2
Sjc-0000574	2.56589e-07	1.2959e-06	0.598822	C3ORF33	TNN20504.1 Protein C3orf33	C2
Sjc-0002129	3.828e-07	1.89505e-06	0.659997	VAMP3	Similar to VAMP3: Vesicle-associated membrane protein 3	C2
Sjc-0001080	5.57652e-07	2.72025e-06	0.666453	ARF1	Similar to ARF1: ADP-ribosylation factor 1	C2
Sjc-0008395	5.99913e-07	2.9122e-06	0.574641	SFT2D2	Similar to SFT2D2: Vesicle transport protein SFT2B	C2
Sjc-0005544	7.15777e-07	3.4523e-06	0.629212	EIF3A	Similar to Eif3a: Eukaryotic translation initiation factor 3 subunit A	C2
Sjc-0004061	7.81923e-07	3.74126e-06	0.61366	SRP14	Similar to Srp14: Signal recognition particle 14 kDa protein	C2
Sjc-0004770	1.29805e-06	6.02809e-06	0.686181	PURA	Similar to PURG: Purine-rich element-binding protein gamma	C2
Sjc-0001981	1.36763e-06	6.33162e-06	0.674433	UNC-9	Similar to unc-9: Innexin unc-9	C2
Sjc-0001751	1.77442e-06	8.06557e-06	0.621087	DIS3L	Similar to DIS3L: DIS3-like exonuclease 1	C2
Sjc-0003040	2.67422e-214	4.01134e-211	5.50355	SJC_0003040	SJCHGC07210 protein	C3
Sjc-0004512	1.16423e-175	8.73172e-173	4.6773	SJC_0004512	SJCHGC04922 protein	C3
Sjc-0001855	1.92459e-165	8.24824e-163	3.399	SJC_0001855	Cell number regulator 11	C3
Sjc-0007667	1.65364e-133	4.96091e-131	2.95806	CALU	Similar to calub: Calumenin-B	C3
Sjc-0008823	1.07463e-126	2.47991e-124	3.33194	SJC_0008823	SJCHGC09419 protein	C3
Sjc-0006284	1.17441e-116	2.07248e-114	2.12323	PCBP3	Similar to PCBP3:Poly(rC)-binding protein 3	C3
Sjc-0000558	8.42285e-103	1.05286e-100	2.39376	AGA	Similar to GM21137: Putative N	C3
Sjc-0009028	1.06631e-100	1.23036e-98	2.27431	SJC_0009028	hypothetical protein	C3
Sjc-0007446	2.05614e-94	1.92764e-92	2.88248	SJC_0007446	SJCHGC05677 protein	C3
Sjc-0002823	1.65435e-90	1.30606e-88	1.97972	SYTL5	Similar to Sytl4: Synaptotagmin-like protein 4	C3
Sjc-0004103	7.09354e-85	4.83651e-83	2.43172	SJC_0004103	hypothetical protein	C3
Sjc-0007005	1.92879e-83	1.23114e-81	2.95666	SJC_0007005	DNA repair XRCC2-like	C3
Sjc-0000114	1.21707e-79	7.45147e-78	1.92398	SJC_0000114	CD63 antigen	C3
Sjc-0007355	2.51052e-69	1.21477e-67	2.06258	SJC_0007355	SJCHGC02607 protein	C3
Sjc-0005220	4.25918e-69	2.02818e-67	2.31491	CLPB	Similar to Clpb: Caseinolytic peptidase B protein homolog	C3
Sjc-0007445	1.82413e-62	7.39511e-61	1.43857	SJC_0007445	SJCHGC08920 protein	C3
Sjc-0005016	7.54529e-60	2.82948e-58	1.86621	N4BP2L2	Similar to N4BP2: NEDD4-binding protein 2	C3
Sjc-0002572	3.18519e-59	1.16531e-57	2.0511	CLEC-50	Similar to Mrc1: Macrophage mannose receptor 1	C3
Sjc-0005747	2.25264e-57	7.67944e-56	1.66309	PRKAR2B	Similar to Pka-R2: cAMP-dependent protein kinase type II regulatory subunit	C3
Sjc-0000100	4.81319e-57	1.6044e-55	1.45411	UXS1	Similar to UXS1: UDP-glucuronic acid decarboxylase 1	C3
Sjc-0002465	5.53343e-54	1.71137e-52	2.03906	TRAPPC4	Similar to Trappc4: Trafficking protein particle complex subunit 4	C3
Sjc-0000526	1.36719e-49	4.02114e-48	1.46503	SLC20A2	Similar to slc20a1b: Sodium-dependent phosphate transporter 1-B	C3
Sjc-0000303	1.28316e-48	3.70143e-47	2.31953	PKM	Similar to pkm: Pyruvate kinase PKM	C3
Sjc-0008385	3.36824e-41	8.21521e-40	1.36542	SJC_0008385	putative ubiquitin 1	C3
Sjc-0002807	4.3398e-41	1.04995e-39	1.49778	SJC_0002807	SJCHGC04593 protein	C3
Sjc-0000292	8.8522e-40	2.10767e-38	1.78844	SJC_0000292	putative tumor protein d52	C3
Sjc-0003407	4.25945e-37	9.60778e-36	1.19056	TEAD4	Similar to TEAD4: Transcriptional enhancer factor TEF-3	C3
Sjc-0005936	5.74992e-37	1.2873e-35	1.34407	ANXA4	Similar to Anxa4: Annexin A4	C3
Sjc-0002376	8.2874e-37	1.84164e-35	1.18934	PKA-C1	Similar to PRKACB: cAMP-dependent protein kinase catalytic subunit beta	C3
Sjc-0006541	1.15461e-35	2.43932e-34	1.2971	TUSC3	Similar to TUSC3: Tumor suppressor candidate 3	C3
Sjc-0001119	4.741e-35	9.94616e-34	1.39696	KNTC1	kinetochore associated 1	C3
Sjc-0001186	1.47108e-31	2.79318e-30	1.47097	TRIP12	Similar to trip12: E3 ubiquitin-protein ligase TRIP12	C3
Sjc-0006972	1.22779e-30	2.27369e-29	1.10596	PLCB4	Similar to PLCB4: 1-phosphatidylinositol 4%2C5-bisphosphate phosphodiesterase beta-4	C3
Sjc-0004987	1.51037e-29	2.71323e-28	1.25208	CTSC	Similar to Cathepsin C	C3
Sjc-0008230	2.96676e-28	5.08587e-27	1.15037	NAE1	Similar to nae1: NEDD8-activating enzyme E1 regulatory subunit	C3
Sjc-0002151	1.32489e-27	2.20815e-26	1.17059	TM9SF2	Similar to TM9SF2: Transmembrane 9 superfamily member 2	C3
Sjc-0002190	2.87249e-27	4.73488e-26	1.07469	SNAP25	Similar to Snap25: Synaptosomal-associated protein 25	C3
Sjc-0007400	2.24591e-25	3.56493e-24	0.945017	SJC_0007400	putative sj-Ts4 protein	C3
Sjc-0006003	1.96157e-24	3.06496e-23	1.13539	SJC_0006003	cement precursor 3B variant 2	C3
Sjc-0003823	2.94308e-24	4.57474e-23	1.04939	TMEM63C	Similar to TMEM63B: CSC1-like protein 2	C3
Sjc-0001053	1.70901e-23	2.5894e-22	1.0106	SJC_0001053	Muscleblind-like protein 3	C3
Sjc-0000868	2.39128e-23	3.56907e-22	0.977499	TLN1	Similar to TLN2: Talin-2	C3
Sjc-0003402	5.92943e-23	8.80609e-22	0.881172	MAST2	Similar to MAST2: Microtubule-associated serine/threonine-protein kinase 2	C3
Sjc-0001521	1.64417e-22	2.39442e-21	1.09629	GYG1	Similar to Gyg1: Glycogenin-1	C3
Sjc-0000798	4.86664e-22	6.91939e-21	0.864426	ANO7	Similar to Ano7: Anoctamin-7	C3
Sjc-0005612	5.60173e-22	7.88976e-21	1.31708	AKR1B10	Similar to AKR1B10: Aldo-keto reductase family 1 member B10	C3
Sjc-0005906	1.19088e-20	1.5601e-19	0.923191	IPO9	Similar to Ipo9: Importin-9	C3
Sjc-0002473	4.19154e-20	5.42009e-19	0.899029	HERC4	Similar to Herc4: Probable E3 ubiquitin-protein ligase HERC4	C3
Sjc-0009404	6.61668e-20	8.37554e-19	1.12805	GNAQ	Similar to Guanine nucleotide-binding protein G	C3
Sjc-0007416	5.56595e-19	6.76027e-18	1.0266	SJC_0007416	Similar to Guanine nucleotide-binding protein subunit beta	C3
Sjc-0006352	4.24384e-18	4.99275e-17	0.894217	SJC_0006352	SJCHGC06327 protein	C3
Sjc-0006676	4.05232e-17	4.58753e-16	1.17074	SSR4	Similar to Ssr4: Translocon-associated protein subunit delta	C3
Sjc-0006217	4.19677e-17	4.73319e-16	0.884877	OS9	Protein OS-9	C3
Sjc-0001999	6.80207e-17	7.50228e-16	0.926178	ARPC5	Similar to arpc5-b: Actin-related protein 2/3 complex subunit 5-B	C3
Sjc-0000110	7.90189e-17	8.6834e-16	1.09403	TM1	Similar to Tropomyosin	C3
Sjc-0003803	9.76306e-17	1.06895e-15	1.0119	SJC_0003803	RNA binding protein MEX3B	C3
Sjc-0001241	1.36689e-16	1.48575e-15	0.91666	EFK-1	Similar to efk-1: Eukaryotic elongation factor 2 kinase	C3
Sjc-0001691	3.03839e-16	3.24383e-15	0.751553	SJC_0001691	Zinc finger protein	C3
Sjc-0006353	7.14986e-16	7.52617e-15	0.795714	RUNDC1	Similar to Rundc1: RUN domain-containing protein 1	C3
Sjc-0009513	9.89309e-16	1.03774e-14	0.826389	TPD52	Similar to TPD52: Tumor protein D52	C3
Sjc-0001904	1.84422e-14	1.81399e-13	0.790818	TPI1	Similar to TPI: Triosephosphate isomerase	C3
Sjc-0007510	2.25879e-13	2.05969e-12	1.11431	PSMA5	Similar to PSMA5: Proteasome subunit alpha type-5	C3
Sjc-0008557	4.42223e-13	3.92505e-12	0.748243	ASCC3	Similar to Rabl3: Rab-like protein 3	C3
Sjc-0009443	6.0017e-13	5.2493e-12	0.921149	SEC11A	Similar to SEC11C: Signal peptidase complex catalytic subunit SEC11C	C3
Sjc-0005167	6.8106e-13	5.93947e-12	0.925802	SJC_0005167	Similar to BRAFLDRAFT_275690: Ubiquitin-fold modifier-conjugating enzyme 1	C3
Sjc-0000101	1.18184e-12	1.0159e-11	0.88687	MAP1B	Similar to Map1b: Microtubule-associated protein 1B	C3
Sjc-0009227	2.03923e-12	1.73798e-11	0.69257	ERP44	Similar to erp-44.2: Endoplasmic reticulum resident protein 44.2	C3
Sjc-0005215	2.29276e-12	1.94301e-11	0.776271	YIPF6	Similar to yipf6: Protein YIPF6	C3
Sjc-0002876	3.03587e-12	2.55115e-11	1.02451	SJC_0002876	guanine nucleotide-binding protein G subunit gamma-3	C3
Sjc-0007536	3.4637e-12	2.90254e-11	0.930244	ARF4	Similar to arf4: ADP-ribosylation factor 4	C3
Sjc-0001475	1.49946e-11	1.18068e-10	0.732294	ITPKA	Similar to ITPKB: Inositol-trisphosphate 3-kinase B	C3
Sjc-0004207	1.53899e-11	1.20547e-10	0.690328	RTN3-A	Similar to rtn3-a: Reticulon-3-A	C3
Sjc-0003176	1.59584e-11	1.24351e-10	0.679226	TFG	Similar to TFG: Protein TFG	C3
Sjc-0001794	4.98501e-11	3.76701e-10	0.824829	SJC_0001794	SJCHGC06653 protein	C3
Sjc-0008343	5.48717e-11	4.10512e-10	0.639045	TM9SF3	Similar to Tm9sf3: Transmembrane 9 superfamily member 3	C3
Sjc-0000811	5.54722e-11	4.13971e-10	0.942265	EIF3H	Similar to v1g168210: Eukaryotic translation initiation factor 3 subunit H	C3
Sjc-0007573	1.10875e-10	8.13265e-10	0.60414	SLC3A1	Similar to SLC3A1: Neutral and basic amino acid transport protein rBAT	C3
Sjc-0006949	1.35969e-10	9.8767e-10	0.680294	UBE2J2	Similar to UBE2J2: Ubiquitin-conjugating enzyme E2 J2	C3
Sjc-0001390	1.71052e-10	1.22765e-09	0.628943	SJC_0001390	SJCHGC08390 protein	C3
Sjc-0002938	2.26682e-10	1.61148e-09	0.623656	GLO3	Similar to ARFGAP3: ADP-ribosylation factor GTPase-activating protein 3	C3
Sjc-0008497	3.34727e-10	2.31378e-09	0.85005	SJC_0008497	hypothetical protein	C3
Sjc-0003934	3.63756e-10	2.50866e-09	0.846281	EIF-6	Similar to eif6: Eukaryotic translation initiation factor 6	C3
Sjc-0001805	8.76174e-10	5.92009e-09	0.696458	RBM15	hypotheticial protein	C3
Sjc-0000964	1.35049e-09	8.96346e-09	0.616191	AGPAT1	Similar to AGPAT1: 1-acyl-sn-glycerol-3-phosphate acyltransferase alpha	C3
Sjc-0009355	2.59234e-09	1.70924e-08	0.578489	SJC_0009355	Glutamate-rich protein 3	C3
Sjc-0004997	3.57744e-09	2.32805e-08	0.721895	HUWE1	Similar to HUWE1: E3 ubiquitin-protein ligase HUWE1	C3
Sjc-0006950	4.83751e-09	3.07469e-08	0.642337	MRPS28	Similar to Mrps28: 28S ribosomal protein S28%2C mitochondrial	C3
Sjc-0001414	5.21036e-09	3.30467e-08	0.539337	BAHD1	Similar to BAHD1: Bromo adjacent homology domain-containing 1 protein	C3
Sjc-0005257	5.83093e-09	3.66725e-08	0.546892	TEP1	Similar to Tep1: Telomerase protein component 1	C3
Sjc-0000416	6.40407e-09	3.98594e-08	0.541077	SJC_0000416	Similar to Adenylosuccinate synthetase	C3
Sjc-0000560	6.74096e-09	4.18693e-08	0.733601	TKT	Similar to TKT: Transketolase	C3
Sjc-0007807	7.69156e-09	4.73813e-08	0.561551	PUM2	Similar to pum: Maternal protein pumilio	C3
Sjc-0008754	1.15626e-08	6.97945e-08	0.628088	YARS	Similar to YARS: Tyrosine--tRNA ligase%2C cytoplasmic	C3
Sjc-0006484	2.02101e-08	1.19586e-07	0.569114	RNASEH2A	Similar to RNASEH2A: Ribonuclease H2 subunit A	C3
Sjc-0001288	2.51833e-08	1.46699e-07	0.689366	CLTC	Similar to Cltc: Clathrin heavy chain 1	C3
Sjc-0007254	3.33603e-08	1.91686e-07	0.671757	SQL-1	Thyroid receptor-interacting protein 11	C3
Sjc-0003215	3.5273e-08	2.01328e-07	0.560707	FRMD7	Similar to RDX: Radixin	C3
Sjc-0001864	3.63949e-08	2.07182e-07	0.558397	GTF2A1	Similar to GTF2A1: Transcription initiation factor IIA subunit 1	C3
Sjc-0003136	3.68508e-08	2.08984e-07	0.560414	ZC3H12D	Similar to ZC3H12D: Probable ribonuclease ZC3H12D	C3
Sjc-0001380	4.14999e-08	2.33583e-07	0.541873	FLAD1	Similar to flad1: FAD synthase	C3
Sjc-0003637	4.50091e-08	2.5098e-07	0.551848	ZMYND11	Similar to ZMYND11: Zinc finger MYND domain-containing protein 11	C3
Sjc-0003619	5.67498e-08	3.11812e-07	0.61669	SJC_0003619	Similar to Cathepsin L	C3
Sjc-0000646	1.17689e-07	6.24898e-07	0.55328	CCDC115	SJCHGC01626 protein	C3
Sjc-0000575	2.76656e-07	1.39257e-06	0.581112	DNAJC3	Similar to DNAJC3: DnaJ homolog subfamily C member 3	C3
Sjc-0001717	1.60574e-06	7.35453e-06	0.634721	SEC22B	Similar to SEC22B: Vesicle-trafficking protein SEC22b	C3
Sjc-0004939	1.44071e-176	1.44071e-173	4.37433	ERC1	Similar to Erc2: ERC protein 2	C4
Sjc-0000602	9.33044e-171	4.66522e-168	3.13935	SVIL	Similar to SVIL: Supervillin	C4
Sjc-0004478	2.97874e-128	8.12383e-126	2.66887	CPEB1	Similar to Cytoplasmic polyadenylation element-binding protein	C4
Sjc-0005053	1.39473e-121	2.98871e-119	2.35256	OAT	Similar to OAT: Ornithine aminotransferase%2C mitochondrial	C4
Sjc-0003550	3.489e-105	4.75773e-103	2.16485	PLOD1	Similar to PLOD3: Multifunctional procollagen lysine hydroxylase and glycosyltransferase LH3	C4
Sjc-0006478	3.35998e-95	3.25159e-93	2.16253	ENTPD1	Similar to Entpd1: Ectonucleoside triphosphate diphosphohydrolase 1	C4
Sjc-0006620	3.03797e-91	2.53164e-89	2.6223	ITPR2	Similar to ITPR2: Inositol 1%2C4%2C5-trisphosphate receptor type 2	C4
Sjc-0000772	4.03258e-89	2.88041e-87	3.79351	SJC_0000772	hypotheticial protein	C4
Sjc-0003698	1.99222e-84	1.32814e-82	2.10009	PTPN14	Tyrosine protein phosphatase non receptor type	C4
Sjc-0003504	2.28657e-84	1.49124e-82	2.30409	PIEZO2	Similar to Piezo2: Piezo-type mechanosensitive ion channel component 2	C4
Sjc-0006636	1.91548e-77	1.12675e-75	1.59055	LMLN	Similar to Lmln: Leishmanolysin-like peptidase	C4
Sjc-0006300	1.18452e-75	6.70482e-74	2.00071	UAP1	Similar to UAP1: UDP-N-acetylhexosamine pyrophosphorylase	C4
Sjc-0009621	1.27268e-69	6.25909e-68	1.96798	SJC_0009621	hypothetical protein	C4
Sjc-0004978	1.43492e-68	6.72621e-67	1.54881	LIMD2	Similar to PLIM2A: LIM domain-containing protein PLIM2a	C4
Sjc-0004130	3.33273e-66	1.49227e-64	1.50077	SJC_0004130	histidine kinase	C4
Sjc-0009369	2.11864e-60	8.14862e-59	1.89966	GPR155	Similar to GPR155: Integral membrane protein GPR155	C4
Sjc-0000004	1.23725e-58	4.47199e-57	2.05935	CD63	Similar to CD63: CD63 antigen	C4
Sjc-0005815	4.82685e-58	1.68379e-56	2.0648	ATP2B1	Similar to Atp2b2: Plasma membrane calcium-transporting ATPase 2	C4
Sjc-0004986	4.87848e-50	1.44905e-48	1.59932	UBP1	Similar to UBP1: Upstream-binding protein 1	C4
Sjc-0008321	2.65978e-47	7.3205e-46	1.83546	STT3B	Similar to STT3B: Dolichyl-diphosphooligosaccharide--protein glycosyltransferase subunit STT3B	C4
Sjc-0009110	3.21275e-45	8.45459e-44	1.30601	ELOVL7	Similar to Elovl7: Elongation of very long chain fatty acids protein 7	C4
Sjc-0002340	4.24873e-45	1.10836e-43	1.37393	ABCC3	Similar to ABCC3: Canalicular multispecific organic anion transporter 2	C4
Sjc-0004253	5.35717e-43	1.32822e-41	1.4902	SH3GLB1	Endophilin-B1	C4
Sjc-0001979	1.12816e-38	2.62362e-37	1.29756	ADA	Similar to ada: Adenosine deaminase	C4
Sjc-0009439	3.93147e-38	9.07261e-37	1.17244	RAB27A	Similar to RAB27A: Ras-related protein Rab-27A	C4
Sjc-0006825	2.02161e-34	4.12573e-33	1.35565	VPS13A	Similar to Vps13a: Vacuolar protein sorting-associated protein 13A	C4
Sjc-0009348	3.4329e-33	6.77546e-32	1.34972	DMXL1	Similar to DMXL2: DmX-like protein 2	C4
Sjc-0003724	1.075e-32	2.10784e-31	1.6401	RAB2B	Similar to RAB2A: Ras-related protein Rab-2A	C4
Sjc-0007608	1.25494e-32	2.44468e-31	1.1745	SJC_0007608	zinc finger C2H2 type	C4
Sjc-0004157	5.23283e-31	9.87326e-30	1.73148	EPABP	Similar to epabp: Embryonic polyadenylate-binding protein	C4
Sjc-0006818	6.21737e-31	1.15852e-29	1.07747	AGFG2	Similar to AGFG1: Arf-GAP domain and FG repeat-containing protein 1	C4
Sjc-0003810	1.54884e-30	2.85062e-29	1.04321	PYGB	Similar to PYGM: Glycogen phosphorylase%2C muscle form	C4
Sjc-0008952	2.11709e-29	3.75816e-28	1.36813	NIT2	Similar to DHAR2: Probable glutathione S-transferase DHAR2%2C chloroplastic	C4
Sjc-0005865	9.33422e-29	1.62806e-27	1.17714	FLNB	Similar to FLNA: Filamin-A	C4
Sjc-0004888	3.64658e-28	6.21577e-27	1.00428	PTPRN2	Similar to PTPRN2: Receptor-type tyrosine-protein phosphatase N2	C4
Sjc-0000102	2.12086e-27	3.51523e-26	1.38338	DST	Similar to DST: Dystonin	C4
Sjc-0003607	4.25325e-27	6.93465e-26	1.44178	SJC_0003607	dna double-strand break repair rad50 ATPase	C4
Sjc-0005459	6.08273e-27	9.81085e-26	1.07143	MGAT1	Similar to MGAT1: Alpha-1%2C3-mannosyl-glycoprotein 2-beta-N-acetylglucosaminyltransferase	C4
Sjc-0006830	1.05586e-25	1.6939e-24	0.943779	SJC_0006830	tegumental antigen	C4
Sjc-0001620	9.40226e-24	1.4465e-22	1.02891	DZANK1	Similar to Dzank1: Double zinc ribbon and ankyrin repeat-containing protein 1	C4
Sjc-0002641	2.03465e-23	3.06731e-22	1.09235	PNP	Similar to PNP: Purine nucleoside phosphorylase	C4
Sjc-0008011	2.27295e-23	3.40943e-22	1.40386	PRKCSH	Similar to PRKCSH: Glucosidase 2 subunit beta	C4
Sjc-0007692	1.3384e-22	1.95863e-21	1.02486	YKT6	Similar to ykt6: Synaptobrevin homolog YKT6	C4
Sjc-0007161	3.78571e-22	5.46016e-21	1.25642	DDX6	Similar to ddx6: Probable ATP-dependent RNA helicase ddx6	C4
Sjc-0004906	4.53292e-22	6.47561e-21	1.16315	RBR-2	Similar to KDM5B: Lysine-specific demethylase 5B	C4
Sjc-0000630	8.55845e-22	1.19978e-20	0.979384	SLC31A1	Similar to Slc31a1: High affinity copper uptake protein 1	C4
Sjc-0000950	1.08091e-21	1.49435e-20	1.12502	SJC_0000950	Serine rich adhesin for platelets	C4
Sjc-0009676	1.93561e-21	2.62752e-20	1.24907	SJC_0009676	Protein of unknown function	C4
Sjc-0009170	2.02766e-21	2.74008e-20	1.08963	GSK4	Similar to GSK4: Shaggy-related protein kinase GSK4	C4
Sjc-0005953	3.8645e-21	5.17566e-20	0.924949	ELOVL4	Similar to ELOVL4: Elongation of very long chain fatty acids protein 4	C4
Sjc-0005910	5.41579e-21	7.1891e-20	1.34355	RMDN1	Regulator of microtubule dynamics protein 1	C4
Sjc-0009289	5.94329e-20	7.58718e-19	1.01754	ICA1	Similar to ICA1: Islet cell autoantigen 1	C4
Sjc-0002036	1.0783e-19	1.3592e-18	0.84954	MSN	Similar to mig-15: Serine/threonine-protein kinase mig-15	C4
Sjc-0007774	5.71423e-19	6.91237e-18	1.01356	SDF2	Similar to SDF2: Stromal cell-derived factor 2	C4
Sjc-0002736	1.86381e-18	2.21005e-17	1.1446	SMARCAD1	Similar to Smarcad1: SWI/SNF-related matrix-associated actin-dependent regulator of chromatin subfamily A containing DEAD/H box 1	C4
Sjc-0009415	4.55342e-18	5.33604e-17	0.950206	GRN	Similar to Grn: Progranulin	C4
Sjc-0009417	6.06842e-18	7.08376e-17	0.795252	USF1	Similar to USF1: Upstream stimulatory factor 1	C4
Sjc-0000710	2.90099e-17	3.32175e-16	0.955757	GDE1	Similar to GDE1: Glycerophosphodiester phosphodiesterase GDE1	C4
Sjc-0008358	3.74689e-17	4.27402e-16	0.97755	SJC_0008358	hypothetical protein	C4
Sjc-0006499	3.92929e-17	4.4651e-16	0.968309	SRPK2	Similar to SRPK2: SRSF protein kinase 2	C4
Sjc-0007979	6.20139e-16	6.57392e-15	0.781826	GOA-1	Similar to Guanine nucleotide-binding protein G	C4
Sjc-0001283	7.00296e-16	7.3975e-15	0.989251	WNK2	Similar to Wnk4: Serine/threonine-protein kinase WNK4	C4
Sjc-0007719	1.07991e-15	1.12883e-14	0.739939	SJC_0007719	Zinc finger C2H2	C4
Sjc-0001835	1.91313e-15	1.97229e-14	0.755452	STXBP1	Similar to STXBP1: Syntaxin-binding protein 1	C4
Sjc-0000754	2.17268e-15	2.23221e-14	0.725758	RAB18	Similar to RAB18A: Ras-related protein Rab-18A	C4
Sjc-0004568	3.04298e-15	3.09456e-14	0.870674	RAB4A	Similar to RAB4A: Ras-related protein Rab-4A	C4
Sjc-0006885	3.05382e-15	3.09509e-14	0.77878	STARD10	Similar to Stard10: START domain-containing protein 10	C4
Sjc-0004272	1.67357e-14	1.65155e-13	0.722062	TPRG1L	Similar to TPRG1L: Tumor protein p63-regulated gene 1-like protein	C4
Sjc-0003848	2.63018e-14	2.57021e-13	0.823619	AAGAB	alpha- and gamma-adaptin-binding protein p34	C4
Sjc-0007604	2.68592e-14	2.61616e-13	0.759009	GMPPB	Similar to GMPPB: Mannose-1-phosphate guanyltransferase beta	C4
Sjc-0008145	3.47289e-14	3.36086e-13	0.693102	MINPP1	Similar to MINPP1: Multiple inositol polyphosphate phosphatase 1	C4
Sjc-0000022	7.7777e-14	7.33746e-13	0.9463	SJC_0000022	Protein of unknown function	C4
Sjc-0003844	8.9263e-14	8.34233e-13	0.89563	SJC_0003844	putative tropomyosin	C4
Sjc-0005015	2.46939e-13	2.2449e-12	0.771387	DHRS3	Similar to SDR16C6: Short-chain dehydrogenase/reductase family 16C member 6	C4
Sjc-0007485	2.66027e-13	2.40386e-12	0.702941	ZDHHC12	Similar to PAT10: Protein S-acyltransferase 10	C4
Sjc-0003458	3.51689e-13	3.14946e-12	0.711916	HMCES	Similar to Hmces: Embryonic stem cell-specific 5-hydroxymethylcytosine-binding protein	C4
Sjc-0004991	4.21098e-13	3.7598e-12	0.726733	EMC10	Similar to EMC10: ER membrane protein complex subunit 10	C4
Sjc-0009029	1.02992e-12	8.90421e-12	0.725426	HOOK3	Similar to BRAFLDRAFT_281537: Protein Hook homolog	C4
Sjc-0007075	1.15023e-12	9.9158e-12	0.809482	SYVN1	Similar to syvn1-a: E3 ubiquitin-protein ligase synoviolin A	C4
Sjc-0001582	2.81163e-12	2.36935e-11	0.694266	SARM1	Similar to Ect4: Sterile alpha and TIR motif-containing protein 1	C4
Sjc-0008707	8.62634e-12	6.91952e-11	0.62957	SEC31A	Similar to SEC31: Protein transport protein SEC31	C4
Sjc-0006283	1.58676e-11	1.23965e-10	0.896644	CANX	Similar to CANX: Calnexin	C4
Sjc-0008745	1.74331e-11	1.3549e-10	0.676083	IPMK	Inositol polyphosphate multikinase	C4
Sjc-0000582	1.89858e-11	1.46835e-10	0.921498	HSPA5	Similar to Hspa5: Endoplasmic reticulum chaperone BiP	C4
Sjc-0007617	3.04125e-11	2.32749e-10	0.8573	DDX3Y	Similar to Ddx3y: ATP-dependent RNA helicase DDX3Y	C4
Sjc-0000969	3.98239e-11	3.03228e-10	0.857727	PSMD2	Similar to PSMD2: 26S proteasome non-ATPase regulatory subunit 2	C4
Sjc-0007554	5.19814e-11	3.91271e-10	0.727018	RPS6KB2	Similar to Rps6kb2: Ribosomal protein S6 kinase beta-2	C4
Sjc-0003428	1.15578e-10	8.45689e-10	0.728762	ANKRD17	Similar to ANKHD1: Ankyrin repeat and KH domain-containing protein 1	C4
Sjc-0009488	1.22842e-10	8.94479e-10	0.79741	BSG	Similar to BSG: Basigin	C4
Sjc-0005179	1.70742e-10	1.22765e-09	0.72327	SJC_0005179	SJCHGC04832 protein	C4
Sjc-0008729	3.00896e-10	2.08956e-09	0.58075	MAN2A1	Similar to Man2a1: Alpha-mannosidase 2	C4
Sjc-0002417	3.86219e-10	2.65747e-09	0.601236	SYT2	Similar to SYT1: Synaptotagmin-1	C4
Sjc-0006417	1.80375e-09	1.19191e-08	0.548267	SLC41A3	Similar to Slc41a1: Solute carrier family 41 member 1	C4
Sjc-0009083	3.72918e-09	2.40592e-08	0.575075	CCDC47	Similar to CCDC47: Coiled-coil domain-containing protein 47	C4
Sjc-0009236	4.57039e-09	2.93248e-08	0.782962	CLK2	Similar to Doa: Serine/threonine-protein kinase Doa	C4
Sjc-0003197	5.29165e-09	3.34915e-08	0.550232	NIPBL	Similar to nipblb: Nipped-B-like protein B	C4
Sjc-0001914	5.59089e-09	3.52367e-08	0.645121	SLC25A11	Similar to SLC25A11: Mitochondrial 2-oxoglutarate/malate carrier protein	C4
Sjc-0008822	6.00518e-09	3.76107e-08	0.672715	SJC_0008822	Similar to Myosin heavy chain%2C striated muscle	C4
Sjc-0001993	6.90589e-09	4.27168e-08	0.757284	DDOST	Similar to DDOST: Dolichyl-diphosphooligosaccharide--protein glycosyltransferase 48 kDa subunit	C4
Sjc-0009419	1.12419e-08	6.79952e-08	0.616949	CAND1	Similar to Cand2: Cullin-associated NEDD8-dissociated protein 2	C4
Sjc-0004598	1.83254e-08	1.0908e-07	0.711154	LANCL1	Similar to lancl1: Glutathione S-transferase LANCL1	C4
Sjc-0007764	2.3322e-08	1.36652e-07	0.671537	GIGYF1	PERQ amino acid-rich with GYF domain-containing protein 2	C4
Sjc-0004191	2.46169e-08	1.43959e-07	0.534455	PPIP5K2	Similar to PPIP5K2: Inositol hexakisphosphate and diphosphoinositol-pentakisphosphate kinase 2	C4
Sjc-0004522	2.46814e-08	1.44055e-07	0.536905	LMNB1	golgin subfamily B member 1	C4
Sjc-0005759	3.20603e-08	1.84608e-07	0.627507	SJC_0005759	Transcription elongation regulator 1	C4
Sjc-0002466	4.19214e-08	2.35513e-07	0.624983	TXNDC9	Similar to TXNDC9: Thioredoxin domain-containing protein 9	C4
Sjc-0008254	4.29225e-08	2.40687e-07	0.532633	ERLIN2	Similar to Erlin2: Erlin-2	C4
Sjc-0000460	6.0364e-08	3.29858e-07	0.629967	ZFAND6	Similar to ZFAND6: AN1-type zinc finger protein 6	C4
Sjc-0005464	6.89207e-08	3.73892e-07	0.565709	AP3M2	Similar to AP3M1: AP-3 complex subunit mu-1	C4
Sjc-0009280	8.05207e-08	4.34464e-07	0.586851	PTP4A1	Similar to PTP4A3: Protein tyrosine phosphatase type IVA 3	C4
Sjc-0001570	1.03392e-07	5.50369e-07	0.623302	LRRC18	Similar to Lrrd1: Leucine-rich repeat and death domain-containing protein 1	C4
Sjc-0008813	1.18834e-07	6.2986e-07	0.55013	ZCCHC14	Similar to Zcchc2: Zinc finger CCHC domain-containing protein 2	C4
Sjc-0006694	1.47005e-07	7.7074e-07	0.579923	TUBA	Similar to tuba: Tubulin alpha chain	C4
Sjc-0001689	1.59897e-07	8.31352e-07	0.545677	SJC_0001689	C10orf118	C4
Sjc-0008417	1.94812e-07	1.00247e-06	0.562864	SEC16A	COPII coat assembly protein SEC16	C4
Sjc-0003927	2.16815e-07	1.1062e-06	0.66695	SJC_0003927	Zinc finger CCHC domain-containing protein 7	C4
Sjc-0008547	3.71996e-07	1.85282e-06	0.569176	ATP6V0B	Similar to Atp6v0b: V-type proton ATPase 21 kDa proteolipid subunit	C4
Sjc-0007423	3.73035e-07	1.85282e-06	0.568703	R3HCC1L	Similar to R3HCC1: R3H and coiled-coil domain-containing protein 1	C4
Sjc-0007399	6.01226e-07	2.91386e-06	0.518879	PIGK	Similar to Pigk: GPI-anchor transamidase	C4
Sjc-0005058	7.56089e-07	3.63504e-06	0.520242	USP46	Similar to USP46: Ubiquitin carboxyl-terminal hydrolase 46	C4
Sjc-0008744	1.08957e-06	5.13143e-06	0.529311	CDC5L	Similar to Cdc5l: Cell division cycle 5-like protein	C4
Sjc-0003300	1.88979e-06	8.55107e-06	0.57703	DDX46	Similar to DDX46: Probable ATP-dependent RNA helicase DDX46	C4
Sjc-0001311	2.69865e-171	1.61919e-168	3.9955	SJC_0001311	hypothetical protein	C5
Sjc-0002486	9.1114e-128	2.27785e-125	3.64212	PPT1	Similar to Ppt1: Palmitoyl-protein thioesterase 1	C5
Sjc-0008219	7.22273e-119	1.35426e-116	4.26866	HORMAD1	Similar to Hormad1: HORMA domain-containing protein 1	C5
Sjc-0006555	1.30742e-115	2.17903e-113	3.61705	CCNB1IP1	cyclin B1 interacting protein 1	C5
Sjc-0004774	6.84164e-112	1.08026e-109	2.95534	MEIOB	Meiosis-specific with OB domain-containing protein	C5
Sjc-0006782	3.88828e-106	5.83242e-104	2.68486	SJC_0006782	Protein of unknown function	C5
Sjc-0000524	1.28072e-101	1.53687e-99	2.75611	YTHDC2	Similar to YTHDC2: 3'-5' RNA helicase YTHDC2	C5
Sjc-0005913	8.94476e-97	9.93862e-95	2.01078	PGP-2	Similar to ABCB1: Multidrug resistance protein 1	C5
Sjc-0007561	4.96565e-96	5.32034e-94	3.2219	SJC_0007561	SJCHGC08378 protein	C5
Sjc-0006896	7.44278e-96	7.69943e-94	2.59159	SPO11	Similar to SPO11: Meiotic recombination protein SPO11	C5
Sjc-0008743	2.55851e-95	2.55851e-93	2.897	ACSL1	Similar to ACSL1: Long-chain-fatty-acid--CoA ligase 1	C5
Sjc-0003010	4.23404e-93	3.73592e-91	2.7518	SJC_0003010	hypothetical protein	C5
Sjc-0001185	2.7493e-91	2.35654e-89	2.23409	DCLK3	Similar to DCLK3: Serine/threonine-protein kinase DCLK3	C5
Sjc-0005112	3.22077e-91	2.61143e-89	2.43881	SJC_0005112	spermatogenesis-associated protein 22	C5
Sjc-0001488	2.82348e-90	2.11761e-88	2.844	GLT1D1	Similar to glt1d1: Glycosyltransferase 1 domain-containing protein 1	C5
Sjc-0007301	5.37522e-90	3.93308e-88	2.25775	SJC_0007301	thymidylate synthase	C5
Sjc-0002502	2.138e-82	1.33625e-80	1.91876	SJC_0002502	arrestin domain-containing 2-like	C5
Sjc-0000258	2.14213e-79	1.28528e-77	1.99697	SJC_0000258	hypothetical protein	C5
Sjc-0004755	3.85143e-76	2.22198e-74	1.96206	SJC_0004755	Docking protein	C5
Sjc-0009266	1.59991e-74	8.8884e-73	1.70481	FRMD5	Similar to FRMD5: FERM domain-containing protein 5	C5
Sjc-0002705	4.57862e-72	2.36825e-70	1.76233	SLC35F1	Similar to SLC35F2: Solute carrier family 35 member F2	C5
Sjc-0003812	8.75965e-72	4.45406e-70	2.40856	SJC_0003812	Protein of unknown function	C5
Sjc-0002704	2.29121e-71	1.14561e-69	1.82893	SLC35F1	Similar to SLC35F2: Solute carrier family 35 member F2	C5
Sjc-0007496	3.85607e-67	1.77972e-65	1.95859	SJC_0007496	SJCHGC04446 protein	C5
Sjc-0006597	5.77552e-67	2.62524e-65	1.78066	PLS3	Similar to fimA: Fimbrin	C5
Sjc-0000672	1.30478e-64	5.67295e-63	1.61351	FARP2	Similar to FARP2: FERM%2C ARHGEF and pleckstrin domain-containing protein 2	C5
Sjc-0001321	4.00193e-64	1.71511e-62	2.17456	SJC_0001321	SJCHGC00975 protein	C5
Sjc-0004064	1.68098e-63	7.10272e-62	2.70216	TRXT	Similar to TrxT: Thioredoxin-T	C5
Sjc-0004453	2.66962e-63	1.11234e-61	2.3917	RPN1	Similar to RPN1: Dolichyl-diphosphooligosaccharide--protein glycosyltransferase subunit 1	C5
Sjc-0009510	3.00035e-63	1.23302e-61	1.9773	SJC_0009510	SJCHGC09590 protein	C5
Sjc-0005889	2.42561e-61	9.70243e-60	1.67676	PGP-2	Similar to Abcb1a: Multidrug resistance protein 1A	C5
Sjc-0008393	7.16996e-61	2.83025e-59	2.3295	SJC_0008393	hypothetical protein	C5
Sjc-0001925	2.04355e-60	7.96189e-59	1.43031	MDH	Similar to mdh: Malate dehydrogenase	C5
Sjc-0003954	5.45722e-60	2.07236e-58	1.471	SJC_0003954	cercarial stage-specific protein Sj20H8	C5
Sjc-0007139	2.39599e-59	8.87404e-58	1.91635	SJC_0007139	Synaptonemal complex protein	C5
Sjc-0006023	2.8198e-58	1.00707e-56	1.98864	PHM	Similar to pghm-1: Probable peptidylglycine alpha-hydroxylating monooxygenase 1	C5
Sjc-0001500	6.44791e-58	2.22342e-56	1.43668	SJC_0001500	SJCHGC04078 protein	C5
Sjc-0009272	4.67525e-57	1.57593e-55	2.17801	SJC_0009272	hypothetical protein	C5
Sjc-0008348	8.03119e-57	2.64764e-55	1.38719	TMEM184B	Similar to TMEM184B: Transmembrane protein 184B	C5
Sjc-0001984	1.90716e-56	6.21899e-55	1.57345	LRRC23	Similar to Lrrc23: Leucine-rich repeat-containing protein 23	C5
Sjc-0002706	3.73751e-56	1.20565e-54	1.54282	SLC35F1	Similar to SLC35F2: Solute carrier family 35 member F2	C5
Sjc-0005871	2.28352e-55	7.28782e-54	1.69255	CEP135	Similar to cep135: Centrosomal protein of 135 kDa	C5
Sjc-0004979	1.63837e-50	4.9151e-49	1.37682	NALCN	Similar to NALCN: Sodium leak channel non-selective protein	C5
Sjc-0003989	8.47315e-49	2.46791e-47	1.57372	SJC_0003989	hypothetical protein	C5
Sjc-0002811	2.05842e-48	5.88119e-47	1.86756	SJC_0002811	SJCHGC04577 protein	C5
Sjc-0006257	3.38832e-48	9.58957e-47	1.41331	MICU3	Similar to MICU2: Calcium uptake protein 2%2C mitochondrial	C5
Sjc-0000687	6.62398e-48	1.85719e-46	1.35319	SPDYA	Similar to spdya-a: Speedy protein 1-A	C5
Sjc-0001919	1.80625e-47	5.01735e-46	1.46008	SJC_0001919	SJCHGC08352 protein	C5
Sjc-0008441	8.21868e-47	2.22126e-45	1.51228	GIPC3	Similar to Gipc3: PDZ domain-containing protein GIPC3	C5
Sjc-0005312	1.37015e-46	3.63756e-45	1.30298	SJC_0005312	diaminopimelate epimerase	C5
Sjc-0000561	7.85541e-45	2.03157e-43	1.52566	SJC_0000561	coiled-coil domain-containing protein 64	C5
Sjc-0003652	3.26204e-44	8.29333e-43	1.23427	SJC_0003652	SJCHGC02678 protein	C5
Sjc-0004043	5.64775e-44	1.41194e-42	1.36487	LACS4	Similar to LACS4: Long chain acyl-CoA synthetase 4	C5
Sjc-0003338	9.46975e-42	2.32863e-40	1.41936	FRRS1	Cytochrome b561/ferric reductase transmembrane domain-containing protein	C5
Sjc-0002130	1.54346e-40	3.70431e-39	1.29944	SJC_0002130	SH3-domain GRB2-like endophilin B1	C5
Sjc-0007394	1.3347e-39	3.15283e-38	1.39722	HFM1	Similar to Hfm1: Probable ATP-dependent DNA helicase HFM1	C5
Sjc-0005912	4.86653e-39	1.14059e-37	1.33901	MGAT2	Similar to MGAT2: Alpha-1%2C6-mannosyl-glycoprotein 2-beta-N-acetylglucosaminyltransferase	C5
Sjc-0001365	9.45249e-38	2.14829e-36	1.30777	SJC_0001365	hypothetical protein Smp_144720	C5
Sjc-0001448	2.19707e-36	4.74187e-35	1.26047	MJ1319	Similar to MJ1319: Uncharacterized sodium-dependent transporter MJ1319	C5
Sjc-0002573	2.6534e-36	5.68587e-35	1.76302	GPD1L	Similar to GPD1L: Glycerol-3-phosphate dehydrogenase 1-like protein	C5
Sjc-0003956	1.11624e-35	2.37498e-34	1.11457	SJC_0003956	SJCHGC09570 protein	C5
Sjc-0001663	8.67769e-35	1.80785e-33	1.14922	SJC_0001663	Similar to Muscle calcium channel subunit alpha-1	C5
Sjc-0009180	5.14702e-34	1.0294e-32	1.44314	ATP1A1	Similar to Sodium/potassium-transporting ATPase subunit alpha	C5
Sjc-0003864	5.11299e-34	1.0294e-32	1.29192	FBXO47	Similar to Fbxo47: F-box only protein 47	C5
Sjc-0005494	8.98934e-34	1.78596e-32	1.45445	PLP1	myelin proteolipid-related	C5
Sjc-0007497	2.02991e-32	3.90368e-31	1.05068	SJC_0007497	EGF type 3 protein	C5
Sjc-0000358	1.46802e-31	2.79318e-30	1.14407	ARGK	Similar to Smp_194770: Taurocyamine kinase	C5
Sjc-0000005	5.37728e-31	1.00824e-29	1.22564	SJC_0000005	CD63 antigen	C5
Sjc-0001878	1.62687e-30	2.94434e-29	1.2937	RYR2	Similar to RyR: Ryanodine receptor	C5
Sjc-0004936	1.94365e-29	3.4708e-28	1.13253	SORT1	Similar to sort1: Sortilin	C5
Sjc-0003213	3.05007e-29	5.35099e-28	1.23887	ANK1	Similar to ANK3: Ankyrin-3	C5
Sjc-0008692	1.81318e-28	3.12618e-27	1.09235	TTLL7	Similar to Ttll7: Tubulin polyglutamylase TTLL7	C5
Sjc-0001558	1.05507e-27	1.77821e-26	1.02097	SJC_0001558	SJCHGC07227 protein	C5
Sjc-0002485	1.17201e-23	1.7939e-22	1.06399	PPT1	Similar to Ppt1: Palmitoyl-protein thioesterase 1	C5
Sjc-0004654	1.42814e-23	2.17484e-22	1.04971	SJC_0004654	DDE superfamily endonuclease CENP B	C5
Sjc-0003761	6.02775e-23	8.90801e-22	0.896446	PDE6D	Similar to PDE6D: Retinal rod rhodopsin-sensitive cGMP 3'%2C5'-cyclic phosphodiesterase subunit delta	C5
Sjc-0006855	9.4176e-22	1.31408e-20	1.04441	SLC39A1	Zinc transporter ZIP1	C5
Sjc-0006940	1.4164e-21	1.94027e-20	0.905432	NUDT1	Similar to Nudt1: 7%2C8-dihydro-8-oxoguanine triphosphatase	C5
Sjc-0001168	5.39008e-21	7.18677e-20	0.843294	CCDC61	Similar to ccdc61: Coiled-coil domain-containing protein 61	C5
Sjc-0007785	3.3636e-20	4.36832e-19	0.962414	FUT8	Similar to FUT8: Alpha-	C5
Sjc-0002575	1.27094e-19	1.59533e-18	0.876427	GPD1L	Similar to GPD1L: Glycerol-3-phosphate dehydrogenase 1-like protein	C5
Sjc-0004993	1.30895e-19	1.63619e-18	0.81179	SLC7A11	Similar to SLC7A11: Cystine/glutamate transporter	C5
Sjc-0001613	4.39129e-19	5.42134e-18	0.858973	SJC_0001613	Similar to Guanine nucleotide-binding protein G	C5
Sjc-0005019	2.29938e-18	2.7158e-17	1.13199	PSAP	Prosaposin	C5
Sjc-0001232	5.80783e-17	6.45315e-16	0.77564	SJC_0001232	Protein of unknown function	C5
Sjc-0007190	1.19181e-15	1.24147e-14	0.915742	FH	Similar to fum1: Fumarate hydratase%2C mitochondrial	C5
Sjc-0005678	5.9811e-14	5.73268e-13	0.695304	MCM8	Similar to Mcm8: DNA helicase MCM8	C5
Sjc-0008795	6.254e-14	5.95619e-13	0.908052	ADTRP	FAR 17a AIG1 protein	C5
Sjc-0002091	8.16387e-14	7.67762e-13	0.698856	SEPT7	Similar to Sept7: Septin-7	C5
Sjc-0009499	2.33923e-12	1.97682e-11	0.797715	SJC_0009499	histone lysine N methyltransferase	C5
Sjc-0001149	3.48916e-12	2.91574e-11	0.685458	LQFR	Similar to CLINT1: Clathrin interactor 1	C5
Sjc-0000929	3.79385e-12	3.14407e-11	0.628658	PHTF1	Similar to Phtf2: Putative homeodomain transcription factor 2	C5
Sjc-0003983	3.85055e-12	3.18228e-11	0.756484	CLPTM1	Similar to CLPTM1: Cleft lip and palate transmembrane protein 1 homolog	C5
Sjc-0007224	6.45225e-12	5.25999e-11	0.729273	DAB2IP	Similar to gap-2: Ras GTPase-activating protein gap-2	C5
Sjc-0001655	1.05053e-11	8.38185e-11	0.720795	CEP104	Similar to CEP104: Centrosomal protein of 104 kDa	C5
Sjc-0002686	1.12501e-11	8.95235e-11	0.860215	HSP67BB	Similar to ytwF: Putative sulfurtransferase YtwF	C5
Sjc-0001713	2.90625e-11	2.23558e-10	0.63481	KIF3C	Similar to KRP95: Kinesin-II 95 kDa subunit	C5
Sjc-0009100	7.15484e-11	5.29988e-10	0.656575	RPL6	Similar to rpl-6: 60S ribosomal protein L6	C5
Sjc-0006664	1.85717e-10	1.32655e-09	0.710031	EBF2	Similar to EBF2: EIN3-binding F-box protein 2	C5
Sjc-0003571	2.83586e-10	1.98775e-09	0.867545	TOP2B	Similar to TOP2A: DNA topoisomerase 2-alpha	C5
Sjc-0005902	2.8925e-10	2.02273e-09	0.676499	FUCTA	SJCHGC07908 protein	C5
Sjc-0003847	4.22269e-10	2.89225e-09	0.761164	SJC_0003847	lysosome-associated membrane glycoprotein	C5
Sjc-0005762	4.31433e-10	2.94829e-09	0.647648	SJC_0005762	hypothetical protein	C5
Sjc-0000834	5.90446e-10	4.01664e-09	0.629395	CPNE5	Similar to Cpne5: Copine-5	C5
Sjc-0006681	3.1969e-09	2.08494e-08	0.590492	PRODH	Similar to B0513.5: Proline dehydrogenase 1%2C mitochondrial	C5
Sjc-0007189	3.59052e-09	2.33151e-08	0.610331	SJC_0007189	hypothetical protein	C5
Sjc-0004065	6.11855e-09	3.82409e-08	0.679737	CREB3L2	Similar to creb3l4: Cyclic AMP-responsive element-binding protein 3-like protein 4	C5
Sjc-0008402	1.5255e-08	9.09841e-08	0.609291	SJC_0008402	SJCHGC05639 protein	C5
Sjc-0004145	4.48156e-08	2.50366e-07	0.554532	SJC_0004145	hypothetical protein	C5
Sjc-0009413	1.20364e-06	5.60704e-06	0.573381	SFRP4	Similar to SMO: Smoothened homolog	C5
