# Supplementary material for: Dynamic single-cell transcriptomics reveals lsamp-guided neural network formation in male S. japonicum driving female reproduction
Source: Research Square preprint supplement (doi:10.21203/rs.3.rs-6983189/v1), 2025-07-10
Supplement: Supplementary file 6 [file 2e70ff4b03edce24b717bef8.xlsx]

## Sheet: Sheet1
Table S3. Top 100 marker genes for each cell type in S. japonicum.
Neoblasts	Germline stem cells	Neural stem cells	Neural precursor cells	Nonciliated neuron	Ciliated neuron	kk7+ Neuron	Parenchyma	Tegument progenitor	Tegument progeny 1	Tegument progeny 2	Syncytial 1	Syncytial 2	Muscle	Flame cells	Gut	Vitellocytes	Mehlis' gland	Male gametes	Esophageal gland	Unknown
Sjc-0004922	Sjc-0008219	Sjc-0001468	Sjc-0000414	Sjc-0003404	Sjc-0004272	Sjc-0002936	Sjc-0005717	Sjc-0003264	Sjc-0006309	Sjc-0000005	Sjc-0000610	Sjc-0000277	Sjc-0007782	Sjc-0009704	Sjc-0002127	Sjc-0002171	Sjc-0008965	Sjc-0007264	Sjc-0003618	Sjc-0001771
Sjc-0009137	Sjc-0000772	Sjc-0002368	Sjc-0001411	Sjc-0005864	Sjc-0001267	Sjc-0002937	Sjc-0004091	Sjc-0004460	Sjc-0000106	Sjc-0002985	Sjc-0008717	Sjc-0000133	Sjc-0009235	Sjc-0008177	Sjc-0008020	Sjc-0006745	Sjc-0008351	Sjc-0002515	Sjc-0003685	Sjc-0002782
Sjc-0003845	Sjc-0006622	Sjc-0006318	Sjc-0006318	Sjc-0008778	Sjc-0006057	Sjc-0005818	Sjc-0001812	Sjc-0001936	Sjc-0002054	Sjc-0000004	Sjc-0008477	Sjc-0003852	Sjc-0008822	Sjc-0000530	Sjc-0007309	Sjc-0004139	Sjc-0000944	Sjc-0002111	Sjc-0002691	Sjc-0002808
Sjc-0003914	Sjc-0003683	Sjc-0001271	Sjc-0002096	Sjc-0001928	Sjc-0005786	Sjc-0000439	Sjc-0007424	Sjc-0000576	Sjc-0003522	Sjc-0007928	Sjc-0006925	Sjc-0000295	Sjc-0000979	Sjc-0008103	Sjc-0007466	Sjc-0008397	Sjc-0006317	Sjc-0006578	Sjc-0006451	Sjc-0000923
Sjc-0007168	Sjc-0002486	Sjc-0001859	Sjc-0000894	Sjc-0009024	Sjc-0002417	Sjc-0008269	Sjc-0008780	Sjc-0004751	Sjc-0006715	Sjc-0008125	Sjc-0009004	Sjc-0009407	Sjc-0001712	Sjc-0009496	Sjc-0005457	Sjc-0002242	Sjc-0000795	Sjc-0008662	Sjc-0001890	Sjc-0001684
Sjc-0008207	Sjc-0009231	Sjc-0003645	Sjc-0007368	Sjc-0003284	Sjc-0002191	Sjc-0008270	Sjc-0003036	Sjc-0008087	Sjc-0000376	Sjc-0008122	Sjc-0008478	Sjc-0000131	Sjc-0003550	Sjc-0001697	Sjc-0007312	Sjc-0002828	Sjc-0008271	Sjc-0001054	Sjc-0009101	Sjc-0000485
Sjc-0002078	Sjc-0008393	Sjc-0002165	Sjc-0007083	Sjc-0004182	Sjc-0001044	Sjc-0005004	Sjc-0001777	Sjc-0005989	Sjc-0006113	Sjc-0005245	Sjc-0008124	Sjc-0000125	Sjc-0003579	Sjc-0000910	Sjc-0007311	Sjc-0002674	Sjc-0007892	Sjc-0001211	Sjc-0003059	Sjc-0003184
Sjc-0001067	Sjc-0005871	Sjc-0005267	Sjc-0008132	Sjc-0000820	Sjc-0009116	Sjc-0002569	Sjc-0001816	Sjc-0007599	Sjc-0001769	Sjc-0005727	Sjc-0001997	Sjc-0009200	Sjc-0002981	Sjc-0009293	Sjc-0000046	Sjc-0008823	Sjc-0001003	Sjc-0002506	Sjc-0002092	Sjc-0005525
Sjc-0008261	Sjc-0003694	Sjc-0007588	Sjc-0005696	Sjc-0005751	Sjc-0003546	Sjc-0005072	Sjc-0004956	Sjc-0000605	Sjc-0002231	Sjc-0001584	Sjc-0003823	Sjc-0000901	Sjc-0005084	Sjc-0005031	Sjc-0002294	Sjc-0001349	Sjc-0006316	Sjc-0002168	Sjc-0005257	Sjc-0009299
Sjc-0008006	Sjc-0003010	Sjc-0001194	Sjc-0001543	Sjc-0005292	Sjc-0001853	Sjc-0007467	Sjc-0006673	Sjc-0003530	Sjc-0002993	Sjc-0005728	Sjc-0006543	Sjc-0000123	Sjc-0003537	Sjc-0007570	Sjc-0004985	Sjc-0003538	Sjc-0008656	Sjc-0000843	Sjc-0003464	Sjc-0006059
Sjc-0001264	Sjc-0003157	Sjc-0004574	Sjc-0002698	Sjc-0006512	Sjc-0001328	Sjc-0001613	Sjc-0001113	Sjc-0006559	Sjc-0007668	Sjc-0005729	Sjc-0006194	Sjc-0002752	Sjc-0007803	Sjc-0000621	Sjc-0000033	Sjc-0000108	Sjc-0004229	Sjc-0009370	Sjc-0004460	Sjc-0004564
Sjc-0005962	Sjc-0007561	Sjc-0001249	Sjc-0007966	Sjc-0001965	Sjc-0008534	Sjc-0006408	Sjc-0005895	Sjc-0001077	Sjc-0003679	Sjc-0000499	Sjc-0004847	Sjc-0001614	Sjc-0002442	Sjc-0009705	Sjc-0004805	Sjc-0006798	Sjc-0007664	Sjc-0003493	Sjc-0002612	Sjc-0003917
Sjc-0007765	Sjc-0001311	Sjc-0002353	Sjc-0006545	Sjc-0006261	Sjc-0008751	Sjc-0006220	Sjc-0005394	Sjc-0003263	Sjc-0008784	Sjc-0006353	Sjc-0003389	Sjc-0001616	Sjc-0004691	Sjc-0005393	Sjc-0007465	Sjc-0006799	Sjc-0004305	Sjc-0007731	Sjc-0003465	Sjc-0006451
Sjc-0003471	Sjc-0004774	Sjc-0003405	Sjc-0000672	Sjc-0006335	Sjc-0008111	Sjc-0008384	Sjc-0006652	Sjc-0006702	Sjc-0007496	Sjc-0005966	Sjc-0005748	Sjc-0007836	Sjc-0003853	Sjc-0009238	Sjc-0007310	Sjc-0006707	Sjc-0003576	Sjc-0000640	Sjc-0001325	Sjc-0002077
Sjc-0005862	Sjc-0002705	Sjc-0003123	Sjc-0004179	Sjc-0008808	Sjc-0006216	Sjc-0000844	Sjc-0004063	Sjc-0005293	Sjc-0000648	Sjc-0002130	Sjc-0009478	Sjc-0003660	Sjc-0000464	Sjc-0009308	Sjc-0007313	Sjc-0000810	Sjc-0002984	Sjc-0001894	Sjc-0000604	Sjc-0006951
Sjc-0001899	Sjc-0005112	Sjc-0005696	Sjc-0005267	Sjc-0006879	Sjc-0003972	Sjc-0006850	Sjc-0001510	Sjc-0001584	Sjc-0001976	Sjc-0008399	Sjc-0003659	Sjc-0000549	Sjc-0000011	Sjc-0001895	Sjc-0002267	Sjc-0006800	Sjc-0001452	Sjc-0003567	Sjc-0008476	Sjc-0001578
Sjc-0008070	Sjc-0004064	Sjc-0004842	Sjc-0002165	Sjc-0000932	Sjc-0009379	Sjc-0004794	Sjc-0008144	Sjc-0001465	Sjc-0006521	Sjc-0007968	Sjc-0008420	Sjc-0008086	Sjc-0005061	Sjc-0006623	Sjc-0007614	Sjc-0009196	Sjc-0000719	Sjc-0003256	Sjc-0006349	Sjc-0008062
Sjc-0003224	Sjc-0003812	Sjc-0001899	Sjc-0003405	Sjc-0007050	Sjc-0006023	Sjc-0009031	Sjc-0008330	Sjc-0006492	Sjc-0007769	Sjc-0000363	Sjc-0002748	Sjc-0006043	Sjc-0001234	Sjc-0005134	Sjc-0007613	Sjc-0003958	Sjc-0000287	Sjc-0002634	Sjc-0007491	Sjc-0009160
Sjc-0000255	Sjc-0002706	Sjc-0001936	Sjc-0005694	Sjc-0003285	Sjc-0003490	Sjc-0003693	Sjc-0005165	Sjc-0005315	Sjc-0004963	Sjc-0004682	Sjc-0002510	Sjc-0000117	Sjc-0004280	Sjc-0006597	Sjc-0001966	Sjc-0000176	Sjc-0008533	Sjc-0000724	Sjc-0006822	Sjc-0000558
Sjc-0002426	Sjc-0000524	Sjc-0007966	Sjc-0004684	Sjc-0006599	Sjc-0004035	Sjc-0004622	Sjc-0004267	Sjc-0002707	Sjc-0004647	Sjc-0004084	Sjc-0008538	Sjc-0007080	Sjc-0001259	Sjc-0000405	Sjc-0002264	Sjc-0005249	Sjc-0006416	Sjc-0005011	Sjc-0008127	Sjc-0000313
Sjc-0006244	Sjc-0003864	Sjc-0001772	Sjc-0007588	Sjc-0009082	Sjc-0006271	Sjc-0001852	Sjc-0008722	Sjc-0006466	Sjc-0006482	Sjc-0002848	Sjc-0006112	Sjc-0000128	Sjc-0007743	Sjc-0006633	Sjc-0000153	Sjc-0002573	Sjc-0003193	Sjc-0000534	Sjc-0004073	Sjc-0002641
Sjc-0007353	Sjc-0005902	Sjc-0000801	Sjc-0006428	Sjc-0006913	Sjc-0003247	Sjc-0000440	Sjc-0007660	Sjc-0007471	Sjc-0005026	Sjc-0002954	Sjc-0005514	Sjc-0003233	Sjc-0000674	Sjc-0008979	Sjc-0002274	Sjc-0006769	Sjc-0003816	Sjc-0004565	Sjc-0005492	Sjc-0008486
Sjc-0002571	Sjc-0000687	Sjc-0000505	Sjc-0004747	Sjc-0002555	Sjc-0006272	Sjc-0000506	Sjc-0004306	Sjc-0007041	Sjc-0007770	Sjc-0001368	Sjc-0002177	Sjc-0000493	Sjc-0007906	Sjc-0004680	Sjc-0002261	Sjc-0008745	Sjc-0000820	Sjc-0002056	Sjc-0003583	Sjc-0007151
Sjc-0001840	Sjc-0006681	Sjc-0000859	Sjc-0002368	Sjc-0009209	Sjc-0002795	Sjc-0008828	Sjc-0007405	Sjc-0009510	Sjc-0008536	Sjc-0008126	Sjc-0001352	Sjc-0000898	Sjc-0009480	Sjc-0000015	Sjc-0002124	Sjc-0000087	Sjc-0006294	Sjc-0008930	Sjc-0002690	Sjc-0002079
Sjc-0004738	Sjc-0008819	Sjc-0007939	Sjc-0006208	Sjc-0003376	Sjc-0008116	Sjc-0005247	Sjc-0001826	Sjc-0006027	Sjc-0003503	Sjc-0000992	Sjc-0002190	Sjc-0000486	Sjc-0003239	Sjc-0004240	Sjc-0002271	Sjc-0008940	Sjc-0002569	Sjc-0005739	Sjc-0003656	Sjc-0003985
Sjc-0000705	Sjc-0006620	Sjc-0008047	Sjc-0001468	Sjc-0007208	Sjc-0001590	Sjc-0008827	Sjc-0005053	Sjc-0001087	Sjc-0000331	Sjc-0009172	Sjc-0004253	Sjc-0004362	Sjc-0004743	Sjc-0004804	Sjc-0007840	Sjc-0000114	Sjc-0007491	Sjc-0005802	Sjc-0001776	Sjc-0008127
Sjc-0007298	Sjc-0001365	Sjc-0002852	Sjc-0003645	Sjc-0009169	Sjc-0004939	Sjc-0004545	Sjc-0005448	Sjc-0000801	Sjc-0002300	Sjc-0001370	Sjc-0001825	Sjc-0000354	Sjc-0001683	Sjc-0004257	Sjc-0006795	Sjc-0000094	Sjc-0004942	Sjc-0005349	Sjc-0004897	Sjc-0004636
Sjc-0008305	Sjc-0007139	Sjc-0006846	Sjc-0007942	Sjc-0002139	Sjc-0004979	Sjc-0007488	Sjc-0008390	Sjc-0004625	Sjc-0006647	Sjc-0001369	Sjc-0003598	Sjc-0000899	Sjc-0003923	Sjc-0005844	Sjc-0002269	Sjc-0001743	Sjc-0005155	Sjc-0000535	Sjc-0005910	Sjc-0008063
Sjc-0006061	Sjc-0005312	Sjc-0005694	Sjc-0004874	Sjc-0004951	Sjc-0002962	Sjc-0002840	Sjc-0007088	Sjc-0000140	Sjc-0009525	Sjc-0001491	Sjc-0001327	Sjc-0009187	Sjc-0002533	Sjc-0002077	Sjc-0006793	Sjc-0001661	Sjc-0006788	Sjc-0002813	Sjc-0005834	Sjc-0006123
Sjc-0001270	Sjc-0003542	Sjc-0006437	Sjc-0008079	Sjc-0009558	Sjc-0006108	Sjc-0003505	Sjc-0004969	Sjc-0002584	Sjc-0000083	Sjc-0001325	Sjc-0003954	Sjc-0008368	Sjc-0008416	Sjc-0006012	Sjc-0000045	Sjc-0009220	Sjc-0006556	Sjc-0000641	Sjc-0000035	Sjc-0006788
Sjc-0001700	Sjc-0000258	Sjc-0009510	Sjc-0005695	Sjc-0002470	Sjc-0002386	Sjc-0004546	Sjc-0003871	Sjc-0002934	Sjc-0009278	Sjc-0000195	Sjc-0002750	Sjc-0002754	Sjc-0005083	Sjc-0005534	Sjc-0007464	Sjc-0006824	Sjc-0009332	Sjc-0006762	Sjc-0000605	Sjc-0007324
Sjc-0000924	Sjc-0002502	Sjc-0008795	Sjc-0006866	Sjc-0007589	Sjc-0005189	Sjc-0005176	Sjc-0006605	Sjc-0005861	Sjc-0003790	Sjc-0001087	Sjc-0003630	Sjc-0000897	Sjc-0001474	Sjc-0007881	Sjc-0002277	Sjc-0003891	Sjc-0006293	Sjc-0008646	Sjc-0007885	Sjc-0005306
Sjc-0008226	Sjc-0005913	Sjc-0007587	Sjc-0008503	Sjc-0006203	Sjc-0006448	Sjc-0005521	Sjc-0005505	Sjc-0000679	Sjc-0007291	Sjc-0004636	Sjc-0003656	Sjc-0007451	Sjc-0007667	Sjc-0002664	Sjc-0004807	Sjc-0000798	Sjc-0001407	Sjc-0003962	Sjc-0005936	Sjc-0002368
Sjc-0004199	Sjc-0003989	Sjc-0003770	Sjc-0002356	Sjc-0000580	Sjc-0002331	Sjc-0005519	Sjc-0001488	Sjc-0001030	Sjc-0008832	Sjc-0009167	Sjc-0000322	Sjc-0001197	Sjc-0008319	Sjc-0002181	Sjc-0002344	Sjc-0003451	Sjc-0008747	Sjc-0000608	Sjc-0008297	Sjc-0003693
Sjc-0000517	Sjc-0001596	Sjc-0005695	Sjc-0004842	Sjc-0007976	Sjc-0003125	Sjc-0001973	Sjc-0005066	Sjc-0002612	Sjc-0008004	Sjc-0004897	Sjc-0008539	Sjc-0007081	Sjc-0006166	Sjc-0002521	Sjc-0007828	Sjc-0008747	Sjc-0000278	Sjc-0005413	Sjc-0003338	Sjc-0005514
Sjc-0008281	Sjc-0000102	Sjc-0005417	Sjc-0008326	Sjc-0007038	Sjc-0008554	Sjc-0006596	Sjc-0003330	Sjc-0008799	Sjc-0008851	Sjc-0000989	Sjc-0008071	Sjc-0007562	Sjc-0006493	Sjc-0009713	Sjc-0006794	Sjc-0002716	Sjc-0008112	Sjc-0009109	Sjc-0005987	Sjc-0004197
Sjc-0004461	Sjc-0006636	Sjc-0003803	Sjc-0007585	Sjc-0007950	Sjc-0003858	Sjc-0006927	Sjc-0000889	Sjc-0001464	Sjc-0004413	Sjc-0003831	Sjc-0002591	Sjc-0006084	Sjc-0001112	Sjc-0002375	Sjc-0007612	Sjc-0004478	Sjc-0000651	Sjc-0009448	Sjc-0005938	Sjc-0000312
Sjc-0007403	Sjc-0001321	Sjc-0005976	Sjc-0002827	Sjc-0006614	Sjc-0008753	Sjc-0001800	Sjc-0004645	Sjc-0001468	Sjc-0009335	Sjc-0000846	Sjc-0008506	Sjc-0005067	Sjc-0009457	Sjc-0004813	Sjc-0002279	Sjc-0005459	Sjc-0001743	Sjc-0006090	Sjc-0006797	Sjc-0006362
Sjc-0003099	Sjc-0006782	Sjc-0006702	Sjc-0003418	Sjc-0008278	Sjc-0003733	Sjc-0006045	Sjc-0006675	Sjc-0008371	Sjc-0002670	Sjc-0005546	Sjc-0002226	Sjc-0003952	Sjc-0006159	Sjc-0004102	Sjc-0008013	Sjc-0004097	Sjc-0002362	Sjc-0000734	Sjc-0004801	Sjc-0008446
Sjc-0007059	Sjc-0005839	Sjc-0009132	Sjc-0005431	Sjc-0007676	Sjc-0007911	Sjc-0003645	Sjc-0001961	Sjc-0002852	Sjc-0008783	Sjc-0006952	Sjc-0005816	Sjc-0009161	Sjc-0007071	Sjc-0002195	Sjc-0000050	Sjc-0000278	Sjc-0007563	Sjc-0001191	Sjc-0001068	Sjc-0001243
Sjc-0005297	Sjc-0003957	Sjc-0005213	Sjc-0007590	Sjc-0004950	Sjc-0004888	Sjc-0002150	Sjc-0005570	Sjc-0006843	Sjc-0002508	Sjc-0006124	Sjc-0004697	Sjc-0008974	Sjc-0000095	Sjc-0009056	Sjc-0004251	Sjc-0000081	Sjc-0000114	Sjc-0002519	Sjc-0001826	Sjc-0002179
Sjc-0002360	Sjc-0007394	Sjc-0002434	Sjc-0001772	Sjc-0001308	Sjc-0002167	Sjc-0000193	Sjc-0008446	Sjc-0008992	Sjc-0004342	Sjc-0009110	Sjc-0000336	Sjc-0003447	Sjc-0002532	Sjc-0006034	Sjc-0000152	Sjc-0009068	Sjc-0007426	Sjc-0001687	Sjc-0005258	Sjc-0005968
Sjc-0007229	Sjc-0009414	Sjc-0001845	Sjc-0001936	Sjc-0009223	Sjc-0007543	Sjc-0001707	Sjc-0008607	Sjc-0006435	Sjc-0009733	Sjc-0004304	Sjc-0009617	Sjc-0000706	Sjc-0000685	Sjc-0004256	Sjc-0002273	Sjc-0006557	Sjc-0001990	Sjc-0006616	Sjc-0006710	Sjc-0004567
Sjc-0007506	Sjc-0001855	Sjc-0001676	Sjc-0002150	Sjc-0006531	Sjc-0006546	Sjc-0001426	Sjc-0007202	Sjc-0006975	Sjc-0004955	Sjc-0008167	Sjc-0004642	Sjc-0003830	Sjc-0007371	Sjc-0009057	Sjc-0002295	Sjc-0001329	Sjc-0001965	Sjc-0009158	Sjc-0003304	Sjc-0000487
Sjc-0007500	Sjc-0006555	Sjc-0007285	Sjc-0001859	Sjc-0006264	Sjc-0009315	Sjc-0005027	Sjc-0007957	Sjc-0003803	Sjc-0002093	Sjc-0002987	Sjc-0004978	Sjc-0009436	Sjc-0005455	Sjc-0004701	Sjc-0007827	Sjc-0004444	Sjc-0002055	Sjc-0002518	Sjc-0005227	Sjc-0001244
Sjc-0004129	Sjc-0006889	Sjc-0001110	Sjc-0002434	Sjc-0009562	Sjc-0002676	Sjc-0000996	Sjc-0002105	Sjc-0004180	Sjc-0002053	Sjc-0002342	Sjc-0002644	Sjc-0005683	Sjc-0003703	Sjc-0006401	Sjc-0002280	Sjc-0001345	Sjc-0005800	Sjc-0007141	Sjc-0004463	Sjc-0003557
Sjc-0003238	Sjc-0001848	Sjc-0005749	Sjc-0000609	Sjc-0002912	Sjc-0004890	Sjc-0000374	Sjc-0000388	Sjc-0007201	Sjc-0000274	Sjc-0001948	Sjc-0003318	Sjc-0007043	Sjc-0002565	Sjc-0008531	Sjc-0000208	Sjc-0001166	Sjc-0002098	Sjc-0000285	Sjc-0002897	Sjc-0002342
Sjc-0008069	Sjc-0002653	Sjc-0000378	Sjc-0002339	Sjc-0003228	Sjc-0003666	Sjc-0000916	Sjc-0008779	Sjc-0001859	Sjc-0000330	Sjc-0006163	Sjc-0001956	Sjc-0007819	Sjc-0005376	Sjc-0008986	Sjc-0007388	Sjc-0007290	Sjc-0000798	Sjc-0006683	Sjc-0006372	Sjc-0002424
Sjc-0007566	Sjc-0005838	Sjc-0006201	Sjc-0005213	Sjc-0006766	Sjc-0002711	Sjc-0008178	Sjc-0003395	Sjc-0001021	Sjc-0002058	Sjc-0009439	Sjc-0009364	Sjc-0000920	Sjc-0005533	Sjc-0006929	Sjc-0009708	Sjc-0009369	Sjc-0008268	Sjc-0003867	Sjc-0003305	Sjc-0002463
Sjc-0002379	Sjc-0000670	Sjc-0007170	Sjc-0002865	Sjc-0001430	Sjc-0007481	Sjc-0007971	Sjc-0006716	Sjc-0002986	Sjc-0004379	Sjc-0002897	Sjc-0002408	Sjc-0001102	Sjc-0001476	Sjc-0006903	Sjc-0001779	Sjc-0009284	Sjc-0004567	Sjc-0002133	Sjc-0009482	Sjc-0002092
Sjc-0007690	Sjc-0004086	Sjc-0002801	Sjc-0001117	Sjc-0006618	Sjc-0005970	Sjc-0006768	Sjc-0007784	Sjc-0002973	Sjc-0008362	Sjc-0003265	Sjc-0007259	Sjc-0003657	Sjc-0004367	Sjc-0008960	Sjc-0006792	Sjc-0001586	Sjc-0001088	Sjc-0002085	Sjc-0004953	Sjc-0007375
Sjc-0002394	Sjc-0005226	Sjc-0005616	Sjc-0001266	Sjc-0008491	Sjc-0007135	Sjc-0009310	Sjc-0003071	Sjc-0008798	Sjc-0001679	Sjc-0006917	Sjc-0000492	Sjc-0001501	Sjc-0002338	Sjc-0009530	Sjc-0007839	Sjc-0000946	Sjc-0004304	Sjc-0007097	Sjc-0009495	Sjc-0005293
Sjc-0001935	Sjc-0003338	Sjc-0006171	Sjc-0001290	Sjc-0000937	Sjc-0008041	Sjc-0000170	Sjc-0006569	Sjc-0006124	Sjc-0006990	Sjc-0004471	Sjc-0001495	Sjc-0003394	Sjc-0005456	Sjc-0002536	Sjc-0008015	Sjc-0003725	Sjc-0001722	Sjc-0009425	Sjc-0004099	Sjc-0009014
Sjc-0000479	Sjc-0001919	Sjc-0002636	Sjc-0001970	Sjc-0003438	Sjc-0002467	Sjc-0003995	Sjc-0005806	Sjc-0007785	Sjc-0000022	Sjc-0004629	Sjc-0008556	Sjc-0007517	Sjc-0001926	Sjc-0006774	Sjc-0008012	Sjc-0005275	Sjc-0009202	Sjc-0002170	Sjc-0000314	Sjc-0001981
Sjc-0008469	Sjc-0000978	Sjc-0006807	Sjc-0002861	Sjc-0000282	Sjc-0003919	Sjc-0007974	Sjc-0007406	Sjc-0005190	Sjc-0002797	Sjc-0002612	Sjc-0008172	Sjc-0001103	Sjc-0002352	Sjc-0002359	Sjc-0002283	Sjc-0001446	Sjc-0006155	Sjc-0008763	Sjc-0003306	Sjc-0004265
Sjc-0005262	Sjc-0001647	Sjc-0006242	Sjc-0005501	Sjc-0007911	Sjc-0007029	Sjc-0002049	Sjc-0005569	Sjc-0003965	Sjc-0005373	Sjc-0008268	Sjc-0008057	Sjc-0003951	Sjc-0000684	Sjc-0002205	Sjc-0006797	Sjc-0001794	Sjc-0008107	Sjc-0003323	Sjc-0008062	Sjc-0003583
Sjc-0003960	Sjc-0004043	Sjc-0004132	Sjc-0008116	Sjc-0001423	Sjc-0008945	Sjc-0006037	Sjc-0007540	Sjc-0004686	Sjc-0009443	Sjc-0004567	Sjc-0002222	Sjc-0000127	Sjc-0005374	Sjc-0007125	Sjc-0002268	Sjc-0000467	Sjc-0006800	Sjc-0002039	Sjc-0008371	Sjc-0008268
Sjc-0006689	Sjc-0008809	Sjc-0003418	Sjc-0007285	Sjc-0001095	Sjc-0002129	Sjc-0005252	Sjc-0009587	Sjc-0006488	Sjc-0002285	Sjc-0004700	Sjc-0002592	Sjc-0002557	Sjc-0002134	Sjc-0006714	Sjc-0002282	Sjc-0009218	Sjc-0009341	Sjc-0001792	Sjc-0006466	Sjc-0001955
Sjc-0007684	Sjc-0002055	Sjc-0004843	Sjc-0009132	Sjc-0009539	Sjc-0000256	Sjc-0006766	Sjc-0007773	Sjc-0007538	Sjc-0007697	Sjc-0000275	Sjc-0009182	Sjc-0005214	Sjc-0000686	Sjc-0008668	Sjc-0001326	Sjc-0008505	Sjc-0000580	Sjc-0006213	Sjc-0001423	Sjc-0009247
Sjc-0004423	Sjc-0000830	Sjc-0005801	Sjc-0002362	Sjc-0007775	Sjc-0006525	Sjc-0009232	Sjc-0003449	Sjc-0005708	Sjc-0000035	Sjc-0002889	Sjc-0009251	Sjc-0004260	Sjc-0001663	Sjc-0005476	Sjc-0002278	Sjc-0006757	Sjc-0007936	Sjc-0006915	Sjc-0007467	Sjc-0004471
Sjc-0007944	Sjc-0001925	Sjc-0005379	Sjc-0000197	Sjc-0006336	Sjc-0004889	Sjc-0000917	Sjc-0007027	Sjc-0000695	Sjc-0001535	Sjc-0007919	Sjc-0000527	Sjc-0003755	Sjc-0007204	Sjc-0007045	Sjc-0007862	Sjc-0003059	Sjc-0009375	Sjc-0005527	Sjc-0000925	Sjc-0000639
Sjc-0006275	Sjc-0002772	Sjc-0000404	Sjc-0000592	Sjc-0001125	Sjc-0004449	Sjc-0001429	Sjc-0001559	Sjc-0004770	Sjc-0007427	Sjc-0001007	Sjc-0002753	Sjc-0004338	Sjc-0000808	Sjc-0009062	Sjc-0004259	Sjc-0001764	Sjc-0006557	Sjc-0009383	Sjc-0001470	Sjc-0000436
Sjc-0007093	Sjc-0005840	Sjc-0003701	Sjc-0003809	Sjc-0003816	Sjc-0003213	Sjc-0007607	Sjc-0002485	Sjc-0003163	Sjc-0008148	Sjc-0008371	Sjc-0005258	Sjc-0006535	Sjc-0005306	Sjc-0009655	Sjc-0008810	Sjc-0006523	Sjc-0001546	Sjc-0002733	Sjc-0006263	Sjc-0009111
Sjc-0005346	Sjc-0007497	Sjc-0007239	Sjc-0005417	Sjc-0006306	Sjc-0001835	Sjc-0000787	Sjc-0004936	Sjc-0003583	Sjc-0009354	Sjc-0001456	Sjc-0003817	Sjc-0007418	Sjc-0000110	Sjc-0002403	Sjc-0002206	Sjc-0001064	Sjc-0005846	Sjc-0004824	Sjc-0000679	Sjc-0003895
Sjc-0001581	Sjc-0000320	Sjc-0003554	Sjc-0002563	Sjc-0006415	Sjc-0008348	Sjc-0006258	Sjc-0000542	Sjc-0006846	Sjc-0002137	Sjc-0009277	Sjc-0000333	Sjc-0003827	Sjc-0005001	Sjc-0001601	Sjc-0002183	Sjc-0006676	Sjc-0007894	Sjc-0009194	Sjc-0004625	Sjc-0007080
Sjc-0003149	Sjc-0003040	Sjc-0000664	Sjc-0006437	Sjc-0004075	Sjc-0003375	Sjc-0004684	Sjc-0003392	Sjc-0006355	Sjc-0007934	Sjc-0006847	Sjc-0009250	Sjc-0007817	Sjc-0005985	Sjc-0006775	Sjc-0006059	Sjc-0005796	Sjc-0009318	Sjc-0006856	Sjc-0000883	Sjc-0000331
Sjc-0007067	Sjc-0000714	Sjc-0002792	Sjc-0000787	Sjc-0009027	Sjc-0000038	Sjc-0001398	Sjc-0006653	Sjc-0008562	Sjc-0005832	Sjc-0006977	Sjc-0003976	Sjc-0006465	Sjc-0001123	Sjc-0005495	Sjc-0003646	Sjc-0006788	Sjc-0002058	Sjc-0005996	Sjc-0008045	Sjc-0001468
Sjc-0003216	Sjc-0001984	Sjc-0005252	Sjc-0007937	Sjc-0003132	Sjc-0006280	Sjc-0001772	Sjc-0005019	Sjc-0002466	Sjc-0009227	Sjc-0000500	Sjc-0000200	Sjc-0000126	Sjc-0000496	Sjc-0003686	Sjc-0007913	Sjc-0001604	Sjc-0001091	Sjc-0005857	Sjc-0000315	Sjc-0002596
Sjc-0004254	Sjc-0001343	Sjc-0005372	Sjc-0001271	Sjc-0003425	Sjc-0006945	Sjc-0005813	Sjc-0004175	Sjc-0006697	Sjc-0008507	Sjc-0001183	Sjc-0008435	Sjc-0005384	Sjc-0000155	Sjc-0007639	Sjc-0004456	Sjc-0001662	Sjc-0007679	Sjc-0000498	Sjc-0005705	Sjc-0009698
Sjc-0005205	Sjc-0004734	Sjc-0001195	Sjc-0007262	Sjc-0005734	Sjc-0007050	Sjc-0000794	Sjc-0004790	Sjc-0004301	Sjc-0001149	Sjc-0006710	Sjc-0005300	Sjc-0003599	Sjc-0008981	Sjc-0008807	Sjc-0007843	Sjc-0002687	Sjc-0000566	Sjc-0005876	Sjc-0005440	Sjc-0005724
Sjc-0004481	Sjc-0006121	Sjc-0004748	Sjc-0006657	Sjc-0003596	Sjc-0008706	Sjc-0009614	Sjc-0006007	Sjc-0009439	Sjc-0001943	Sjc-0005929	Sjc-0007983	Sjc-0000245	Sjc-0006956	Sjc-0002877	Sjc-0005834	Sjc-0005827	Sjc-0006020	Sjc-0001887	Sjc-0002986	Sjc-0009202
Sjc-0005808	Sjc-0000671	Sjc-0002827	Sjc-0003123	Sjc-0005259	Sjc-0005368	Sjc-0002014	Sjc-0006554	Sjc-0005460	Sjc-0008856	Sjc-0008649	Sjc-0008429	Sjc-0004903	Sjc-0007325	Sjc-0004442	Sjc-0008445	Sjc-0004864	Sjc-0002823	Sjc-0005422	Sjc-0003842	Sjc-0007262
Sjc-0000773	Sjc-0007626	Sjc-0003295	Sjc-0006462	Sjc-0004814	Sjc-0008890	Sjc-0002362	Sjc-0004708	Sjc-0001249	Sjc-0000868	Sjc-0003264	Sjc-0005384	Sjc-0002100	Sjc-0005375	Sjc-0009183	Sjc-0007917	Sjc-0004071	Sjc-0002612	Sjc-0003450	Sjc-0001981	Sjc-0000790
Sjc-0009376	Sjc-0006134	Sjc-0001412	Sjc-0000536	Sjc-0007799	Sjc-0002549	Sjc-0009615	Sjc-0001814	Sjc-0003500	Sjc-0002196	Sjc-0003904	Sjc-0000334	Sjc-0001504	Sjc-0001556	Sjc-0008672	Sjc-0004581	Sjc-0009765	Sjc-0006873	Sjc-0008176	Sjc-0004113	Sjc-0004178
Sjc-0006692	Sjc-0002811	Sjc-0000626	Sjc-0001928	Sjc-0001660	Sjc-0006839	Sjc-0009612	Sjc-0005805	Sjc-0009343	Sjc-0003823	Sjc-0001367	Sjc-0004640	Sjc-0004160	Sjc-0002799	Sjc-0006921	Sjc-0000945	Sjc-0005077	Sjc-0002069	Sjc-0004775	Sjc-0006397	Sjc-0007081
Sjc-0005264	Sjc-0001210	Sjc-0003808	Sjc-0009379	Sjc-0007659	Sjc-0003591	Sjc-0005831	Sjc-0000374	Sjc-0005951	Sjc-0003321	Sjc-0005928	Sjc-0006292	Sjc-0007314	Sjc-0009177	Sjc-0009302	Sjc-0008014	Sjc-0004983	Sjc-0006885	Sjc-0006564	Sjc-0001584	Sjc-0001088
Sjc-0006211	Sjc-0009216	Sjc-0009343	Sjc-0004574	Sjc-0007937	Sjc-0002999	Sjc-0000368	Sjc-0005093	Sjc-0007477	Sjc-0001182	Sjc-0002934	Sjc-0001027	Sjc-0009310	Sjc-0007493	Sjc-0003933	Sjc-0002025	Sjc-0005033	Sjc-0002179	Sjc-0009384	Sjc-0008266	Sjc-0004755
Sjc-0001035	Sjc-0008255	Sjc-0002036	Sjc-0005293	Sjc-0004025	Sjc-0006462	Sjc-0005747	Sjc-0003258	Sjc-0005854	Sjc-0006697	Sjc-0007925	Sjc-0005156	Sjc-0002102	Sjc-0003698	Sjc-0007640	Sjc-0002647	Sjc-0003692	Sjc-0003636	Sjc-0004935	Sjc-0006362	Sjc-0009428
Sjc-0004960	Sjc-0009032	Sjc-0000783	Sjc-0008061	Sjc-0000669	Sjc-0002896	Sjc-0004032	Sjc-0007671	Sjc-0004700	Sjc-0000026	Sjc-0002424	Sjc-0000951	Sjc-0008085	Sjc-0008861	Sjc-0002175	Sjc-0004391	Sjc-0000447	Sjc-0004574	Sjc-0008716	Sjc-0004316	Sjc-0005027
Sjc-0007086	Sjc-0004654	Sjc-0008448	Sjc-0001308	Sjc-0005927	Sjc-0007869	Sjc-0004685	Sjc-0009053	Sjc-0002805	Sjc-0001929	Sjc-0003263	Sjc-0006189	Sjc-0000129	Sjc-0005523	Sjc-0008127	Sjc-0004583	Sjc-0006556	Sjc-0009014	Sjc-0002839	Sjc-0004317	Sjc-0003811
Sjc-0004241	Sjc-0001478	Sjc-0007586	Sjc-0000283	Sjc-0001477	Sjc-0009087	Sjc-0004778	Sjc-0002588	Sjc-0000971	Sjc-0000435	Sjc-0002179	Sjc-0003396	Sjc-0000124	Sjc-0002140	Sjc-0005481	Sjc-0007400	Sjc-0006565	Sjc-0000787	Sjc-0000476	Sjc-0005708	Sjc-0000257
Sjc-0008058	Sjc-0003553	Sjc-0001489	Sjc-0008243	Sjc-0003527	Sjc-0003842	Sjc-0004574	Sjc-0003327	Sjc-0006367	Sjc-0002192	Sjc-0006538	Sjc-0000332	Sjc-0000294	Sjc-0000982	Sjc-0004830	Sjc-0005525	Sjc-0005731	Sjc-0004471	Sjc-0009185	Sjc-0006702	Sjc-0006104
Sjc-0001789	Sjc-0007402	Sjc-0000156	Sjc-0001676	Sjc-0009658	Sjc-0006857	Sjc-0007083	Sjc-0008065	Sjc-0003561	Sjc-0000536	Sjc-0002707	Sjc-0004641	Sjc-0003652	Sjc-0002530	Sjc-0006250	Sjc-0000243	Sjc-0002805	Sjc-0002503	Sjc-0003562	Sjc-0004414	Sjc-0000442
Sjc-0009701	Sjc-0007978	Sjc-0005883	Sjc-0007936	Sjc-0004890	Sjc-0005590	Sjc-0006216	Sjc-0009311	Sjc-0000664	Sjc-0005389	Sjc-0006849	Sjc-0009262	Sjc-0001340	Sjc-0005279	Sjc-0007004	Sjc-0002112	Sjc-0000014	Sjc-0002342	Sjc-0000523	Sjc-0008087	Sjc-0006779
Sjc-0007350	Sjc-0009621	Sjc-0006497	Sjc-0001850	Sjc-0007508	Sjc-0000387	Sjc-0000512	Sjc-0004148	Sjc-0006679	Sjc-0001999	Sjc-0008628	Sjc-0002846	Sjc-0008775	Sjc-0007383	Sjc-0002809	Sjc-0001309	Sjc-0007604	Sjc-0001535	Sjc-0001536	Sjc-0003728	Sjc-0001141
Sjc-0002088	Sjc-0002314	Sjc-0001189	Sjc-0006374	Sjc-0003361	Sjc-0008175	Sjc-0002695	Sjc-0004149	Sjc-0003440	Sjc-0008984	Sjc-0009111	Sjc-0006352	Sjc-0009005	Sjc-0002472	Sjc-0004204	Sjc-0009746	Sjc-0002572	Sjc-0002905	Sjc-0002125	Sjc-0003836	Sjc-0009491
Sjc-0002574	Sjc-0006069	Sjc-0002988	Sjc-0007607	Sjc-0003879	Sjc-0009066	Sjc-0008847	Sjc-0000765	Sjc-0008678	Sjc-0009048	Sjc-0008627	Sjc-0007100	Sjc-0000134	Sjc-0008532	Sjc-0005047	Sjc-0000049	Sjc-0008321	Sjc-0004952	Sjc-0004811	Sjc-0005966	Sjc-0005865
Sjc-0004072	Sjc-0008573	Sjc-0002416	Sjc-0007429	Sjc-0003925	Sjc-0003363	Sjc-0001470	Sjc-0005030	Sjc-0003813	Sjc-0001256	Sjc-0006492	Sjc-0004269	Sjc-0009174	Sjc-0007990	Sjc-0003532	Sjc-0002842	Sjc-0000582	Sjc-0009111	Sjc-0002449	Sjc-0006779	Sjc-0001927
Sjc-0000876	Sjc-0005948	Sjc-0003200	Sjc-0001242	Sjc-0001177	Sjc-0006432	Sjc-0006825	Sjc-0003834	Sjc-0009413	Sjc-0008285	Sjc-0005237	Sjc-0004319	Sjc-0002101	Sjc-0004283	Sjc-0004846	Sjc-0008216	Sjc-0004224	Sjc-0003909	Sjc-0001410	Sjc-0006843	Sjc-0007208
Sjc-0003928	Sjc-0002575	Sjc-0006300	Sjc-0003375	Sjc-0002327	Sjc-0009300	Sjc-0005267	Sjc-0000541	Sjc-0004991	Sjc-0008435	Sjc-0002509	Sjc-0008792	Sjc-0000952	Sjc-0006632	Sjc-0001408	Sjc-0004808	Sjc-0001993	Sjc-0005747	Sjc-0004174	Sjc-0001468	Sjc-0008807
Sjc-0002969	Sjc-0006975	Sjc-0000140	Sjc-0002806	Sjc-0001588	Sjc-0001420	Sjc-0003746	Sjc-0006239	Sjc-0006446	Sjc-0000179	Sjc-0003435	Sjc-0006544	Sjc-0003829	Sjc-0002320	Sjc-0008694	Sjc-0002194	Sjc-0007195	Sjc-0007594	Sjc-0005939	Sjc-0006435	Sjc-0002799
Sjc-0004496	Sjc-0002704	Sjc-0008884	Sjc-0002605	Sjc-0001163	Sjc-0006547	Sjc-0000438	Sjc-0002014	Sjc-0005830	Sjc-0003766	Sjc-0009014	Sjc-0000330	Sjc-0002753	Sjc-0006951	Sjc-0008988	Sjc-0007063	Sjc-0006746	Sjc-0000639	Sjc-0004776	Sjc-0001859	Sjc-0003824
Sjc-0004786	Sjc-0000398	Sjc-0006712	Sjc-0006450	Sjc-0002727	Sjc-0001440	Sjc-0004033	Sjc-0001811	Sjc-0009511	Sjc-0000202	Sjc-0006417	Sjc-0004338	Sjc-0000965	Sjc-0004530	Sjc-0006148	Sjc-0007672	Sjc-0000471	Sjc-0000442	Sjc-0003563	Sjc-0008753	Sjc-0001595
Sjc-0001786	Sjc-0007301	Sjc-0008266	Sjc-0004032	Sjc-0008405	Sjc-0003747	Sjc-0002674	Sjc-0005903	Sjc-0006959	Sjc-0004065	Sjc-0001150	Sjc-0001589	Sjc-0001669	Sjc-0000203	Sjc-0007594	Sjc-0000845	Sjc-0006030	Sjc-0001396	Sjc-0002810	Sjc-0000185	Sjc-0008605
Sjc-0002566	Sjc-0004512	Sjc-0003175	Sjc-0004025	Sjc-0006854	Sjc-0007270	Sjc-0006599	Sjc-0006906	Sjc-0008282	Sjc-0000357	Sjc-0005813	Sjc-0002788	Sjc-0000951	Sjc-0006368	Sjc-0001924	Sjc-0007841	Sjc-0000177	Sjc-0001308	Sjc-0008674	Sjc-0006938	Sjc-0009068
Sjc-0008443	Sjc-0005678	Sjc-0005559	Sjc-0002353	Sjc-0002167	Sjc-0006183	Sjc-0003418	Sjc-0003693	Sjc-0007336	Sjc-0004463	Sjc-0006466	Sjc-0007331	Sjc-0007953	Sjc-0007887	Sjc-0002317	Sjc-0004839	Sjc-0006598	Sjc-0001398	Sjc-0001566	Sjc-0000083	Sjc-0006710
Sjc-0000577	Sjc-0001558	Sjc-0002018	Sjc-0007413	Sjc-0001402	Sjc-0002635	Sjc-0003880	Sjc-0005787	Sjc-0003090	Sjc-0007294	Sjc-0002603	Sjc-0000922	Sjc-0004907	Sjc-0006918	Sjc-0007210	Sjc-0002290	Sjc-0002547	Sjc-0001723	Sjc-0006264	Sjc-0001021	Sjc-0009375
Sjc-0004974	Sjc-0001168	Sjc-0005501	Sjc-0000404	Sjc-0008933	Sjc-0007049	Sjc-0003213	Sjc-0008384	Sjc-0009444	Sjc-0001956	Sjc-0007441	Sjc-0003595	Sjc-0004566	Sjc-0004784	Sjc-0007822	Sjc-0001266	Sjc-0007536	Sjc-0003968	Sjc-0005281	Sjc-0001184	Sjc-0006904
Sjc-0007879	Sjc-0002686	Sjc-0007477	Sjc-0004497	Sjc-0000723	Sjc-0005080	Sjc-0000531	Sjc-0001159	Sjc-0006875	Sjc-0007201	Sjc-0009491	Sjc-0007831	Sjc-0003473	Sjc-0009305	Sjc-0001331	Sjc-0007630	Sjc-0007225	Sjc-0006745	Sjc-0008392	Sjc-0007968	Sjc-0007567
Sjc-0003494	Sjc-0008885	Sjc-0008320	Sjc-0006045	Sjc-0004888	Sjc-0008553	Sjc-0006318	Sjc-0006942	Sjc-0003964	Sjc-0000275	Sjc-0000639	Sjc-0003398	Sjc-0008400	Sjc-0005091	Sjc-0006022	Sjc-0008444	Sjc-0009272	Sjc-0006710	Sjc-0002333	Sjc-0007285	Sjc-0006447
