# Supplementary material for: Dynamic single-cell transcriptomics reveals lsamp-guided neural network formation in male S. japonicum driving female reproduction
Source: Research Square preprint supplement (doi:10.21203/rs.3.rs-6983189/v1), 2025-07-10
Supplement: Supplementary file 7 [file 525893ce8dc362d1ddccc181.xlsx]

## Sheet: Sheet1
Table S1. Quality control of S. japonicum single-cell transcriptome data
	14dpi	18dpi_F	18dpi_M	22dpi_F	22dpi_M	26dpi_F	26dpi_M
Estimated.Number.of.Cells	16517	17970	16360	15286	13842	14538	15691
Mean.Reads.per.Cell	31627	31074	47644	53314	53678	34349	31902
Median.Genes.per.Cell	1698	1512	1699	1645	1804	1867	1660
Number.of.Reads	522394662	558410259	779465791	814958072	743018117	499373534	500585730
Valid.Barcodes	0.972	0.98	0.979	0.976	0.977	0.971	0.971
Sequencing.Saturation	0.591	0.746	0.808	0.784	0.789	0.546	0.65
Q30.Bases.in.Barcode	0.961	0.962	0.962	0.973	0.973	0.961	0.961
Q30.Bases.in.RNA.Read	0.923	0.921	0.92	0.934	0.931	0.919	0.917
Q30.Bases.in.UMI	0.955	0.956	0.956	0.97	0.969	0.955	0.955
Reads.Mapped.to.Genome	0.741	0.915	0.915	0.815	0.845	0.777	0.76
Reads.Mapped.Antisense.to.Gene	0.011	0.011	0.011	0.011	0.011	0.006	0.007
Fraction.Reads.in.Cells	0.736	0.845	0.821	0.725	0.777	0.78	0.755
Total.Genes.Detected	8990	9045	9046	9120	9138	9081	9136
Median.UMI.Counts.per.Cell	3432	2714	3201	3063	3453	3929	2939
