# Supplementary material for: Dynamic single-cell transcriptomics reveals lsamp-guided neural network formation in male S. japonicum driving female reproduction
Source: Research Square preprint supplement (doi:10.21203/rs.3.rs-6983189/v1), 2025-07-10
Supplement: Supplementary file 8 [file 98501dcd489e2d028b5d6cf3.xlsx]

## Sheet: Sheet1
Table S5. Cellular composition dynamics across developmental time points in S. japonicum.
Cell Type	14dpi	18dpi_F	18dpi_M	22dpi_F	22dpi_M	26dpi_F	26dpi_M
Neoblasts	29.62	20.82	23.89	23.72	22.66	34.23	19.54
Germline stem cells	0.39	0.6	0.71	3.94	2.09	7.86	1.83
Neural stem cells	9.38	6.18	7.54	4.75	4.07	3.03	3.26
Neural precursor cells	21.08	22.99	25.94	13.41	13.12	4.16	7.24
Nonciliated neuron	1.38	4.66	4.03	4.74	4.53	3.12	6.62
Ciliated neuron	6.55	15.79	10.94	15.59	15.22	8.57	25.08
kk7+ Neuron	0.62	0.48	1.16	0.45	1.01	0.17	0.47
Parenchyma	4.34	5.49	5.63	5.77	11.32	12.31	13.52
Tegument progenitor	5.22	4.47	6.58	5.01	6.68	5.17	4.96
Tegument progeny 1	0.4	0.9	1.02	1.47	2.8	2.03	2.87
Tegument progeny 2	3.23	3.5	5.12	4.02	7.08	5.37	4.78
Syncytial 1	0.1	0.3	0.18	0.96	1.29	0.9	1.28
Syncytial 2	0.25	0.64	0.64	0.9	1.51	2.31	1.45
Muscle	16.18	9.98	5.42	12.14	3.78	3.97	4.31
Flame cells	0.41	0.82	0.38	0.97	1.33	2.25	1.13
Gut	0	0.01	0	0.06	0.01	0.03	0.01
Vitellocytes	0.01	0.01	0.03	0.37	0.08	3	0.02
Mehlis' gland	0.1	0.77	0	0.17	0.01	0.15	0
Male gametes	0	0.01	0	0.01	0.07	0.02	1.06
Esophageal gland	0.39	0.84	0.71	0.97	1.18	1.24	0.45
Unknown	0.34	0.74	0.1	0.58	0.14	0.12	0.12
