# Supplementary material for: Dynamic single-cell transcriptomics reveals lsamp-guided neural network formation in male S. japonicum driving female reproduction
Source: Research Square preprint supplement (doi:10.21203/rs.3.rs-6983189/v1), 2025-07-10
Supplement: Supplementary file 9 [file 9e0ef906abec561ea7cbbac6.xlsx]

## Sheet: Sheet1
Table S12. Upregulated genes in lsamp RNAi vs. gfp RNAi males of S. japonicum.
Gene ID	baseMean	log2FoldChange	lfcSE	stat	pvalue	padj	Annotation
Sjc-0002206	844.14	0.599987	0.10584	5.66883	1.43776e-08	1.74291e-05	Ribonuclease Oy
Sjc-0009286	495.56	0.771353	0.162757	4.7393	2.14456e-06	0.00111117	hypotheticial protein
Sjc-0005658	446.986	0.715815	0.166386	4.30214	1.69156e-05	0.00365188	Similar to UBLCP1: Ubiquitin-like domain-containing CTD phosphatase 1
Sjc-0001550	201.82	0.768587	0.190303	4.03877	5.37329e-05	0.00877597	Protein of unknown function
Sjc-0009518	239.06	0.650006	0.161189	4.03257	5.51693e-05	0.00877597	SJCHGC09590 protein
Sjc-0002285	713.887	0.644158	0.162487	3.96435	7.35952e-05	0.0100348	Transcription initiation factor TFIID subunit 3
Sjc-0001103	174.885	0.904882	0.231904	3.90197	9.54134e-05	0.0102444	Protein of unknown function
Sjc-0008488	780.335	0.78973	0.202023	3.90912	9.26335e-05	0.0102444	hypothetical protein
Sjc-0009471	991.311	0.726476	0.186593	3.89338	9.88584e-05	0.0102444	SJCHGC04690 protein
Sjc-0005510	324.152	0.7353	0.18987	3.87266	0.000107655	0.0107269	Similar to primpol: DNA-directed primase/polymerase protein
Sjc-0009287	169.222	0.833036	0.216474	3.8482	0.000118989	0.0112779	SJCHGC00851 protein
Sjc-0008216	135.281	1.021	0.279185	3.65709	0.000255095	0.0171562	SJCHGC08962 protein
Sjc-0005197	366.361	0.656374	0.180021	3.6461	0.000266247	0.0173888	Ubiquinone biosynthesis O-methyltransferase
Sjc-0009524	214.226	0.670393	0.190761	3.51431	0.000440902	0.0223955	Similar to rbm46: Probable RNA-binding protein 46
Sjc-0008823	127.662	0.977976	0.279154	3.50335	0.000459441	0.0228896	SJCHGC09419 protein
Sjc-0009612	161.131	0.868753	0.255966	3.39401	0.000688767	0.0299056	Protein of unknown function
Sjc-0002291	201.592	0.655811	0.193786	3.3842	0.000713862	0.0304843	Similar to EBNA1BP2: Probable rRNA-processing protein EBP2
Sjc-0005122	135.844	0.749131	0.230062	3.25622	0.00112907	0.037824	Protein of unknown function
Sjc-0009451	168.66	0.623661	0.198832	3.13662	0.00170908	0.0466069	Similar to TRX4: Thioredoxin H4
