# Supplementary material for: Dynamic single-cell transcriptomics reveals lsamp-guided neural network formation in male S. japonicum driving female reproduction
Source: Research Square preprint supplement (doi:10.21203/rs.3.rs-6983189/v1), 2025-07-10
Supplement: Supplementary file 10 [file 9e33c2a658cdba74292e6b25.xlsx]

## Sheet:  Primers and squences of dsRNAs
Table S16. Primers for RNAi experiments in S. japonicum.
Primer name	Forward Primer (5’-3’)	Reverse Primer (5’-3’)
gfp_dsRNA	GCAGCACGACTTCTTCAA	ACTCCAGCAGGACCAT
Sj ddc_dsRNA	CGCTGATATACTCGCTGAT	ACCATACAAGTGAACAATCG
Sj lsamp_dsRNA	GCGTGTAATAGACCTTGATG	TGTAGTGGAGTAAGATGATGG
psmd_qPCR	CCTCACCAACAATTTCCACATCT	GATCACTTATAGCCTTGCGAACAT
Sj ddc_qPCR	ATACCGAATGAAGCACCAA	ATGTGTAACTCCTGGCATAA
Sj lsamp_qPCR	GACGAAGGTGAATATGTATGC	CACTCTTGTAGAACTGGAACT
Sj nrps_qPCR	CTCAAGAACCACTAACATCAG	ACCACTCATCTTCCATCAG
