# Supplementary material for: Dynamic single-cell transcriptomics reveals lsamp-guided neural network formation in male S. japonicum driving female reproduction
Source: Research Square preprint supplement (doi:10.21203/rs.3.rs-6983189/v1), 2025-07-10
Supplement: Supplementary file 11 [file b2b7c77ca52e63b5e1eb5fe7.xlsx]

## Sheet: Sheet1
Table S14. Enriched GO terms (Molecular Function) for downregulated genes in lsamp RNAi males of S. japonicum.
ID	Description	setSize	enrichmentScore	NES	pvalue	p.adjust	qvalues	rank	leading_edge	core_enrichment
GO:0005198	structural molecule activity	333	-0.455587	-2.01665	3.8661e-10	2.49364e-07	2.31559e-07	1783	tags=36%, list=20%, signal=30%	Sjc_0007498/Sjc_0002424/Sjc_0000172/Sjc_0007456/Sjc_0005664/Sjc_0004743/Sjc_0001165/Sjc_0007586/Sjc_0006166/Sjc_0009230/Sjc_0005536/Sjc_0006934/Sjc_0001212/Sjc_0002913/Sjc_0002651/Sjc_0008345/Sjc_0006159/Sjc_0005277/Sjc_0001577/Sjc_0003096/Sjc_0003800/Sjc_0009184/Sjc_0006597/Sjc_0000919/Sjc_0007280/Sjc_0004910/Sjc_0003094/Sjc_0000855/Sjc_0006699/Sjc_0001459/Sjc_0006535/Sjc_0007523/Sjc_0008365/Sjc…
GO:0003735	structural constituent of ribosome	156	-0.534651	-2.18103	6.94092e-08	2.23845e-05	2.07862e-05	1757	tags=48%, list=20%, signal=39%	Sjc_0007456/Sjc_0005664/Sjc_0001165/Sjc_0009230/Sjc_0005536/Sjc_0001212/Sjc_0002913/Sjc_0002651/Sjc_0005277/Sjc_0001577/Sjc_0003096/Sjc_0000919/Sjc_0004910/Sjc_0003094/Sjc_0000855/Sjc_0006699/Sjc_0001459/Sjc_0007523/Sjc_0008365/Sjc_0007197/Sjc_0009429/Sjc_0008927/Sjc_0004749/Sjc_0001046/Sjc_0006243/Sjc_0006359/Sjc_0006410/Sjc_0003950/Sjc_0006480/Sjc_0006472/Sjc_0004660/Sjc_0004233/Sjc_0000661/Sjc…
GO:0019829	ATPase-coupled cation transmembrane transporter activity	39	-0.631766	-2.01953	0.00152492	0.212236	0.197082	2047	tags=62%, list=23%, signal=47%	Sjc_0008111/Sjc_0005455/Sjc_0001147/Sjc_0004651/Sjc_0006235/Sjc_0001555/Sjc_0005387/Sjc_0004620/Sjc_0005456/Sjc_0000770/Sjc_0008820/Sjc_0007951/Sjc_0004664/Sjc_0005299/Sjc_0002996/Sjc_0006670/Sjc_0008547/Sjc_0002845/Sjc_0006236/Sjc_0005874/Sjc_0007207/Sjc_0008545/Sjc_0005564/Sjc_0006237
GO:0022853	active ion transmembrane transporter activity	40	-0.625472	-2.01949	0.00230334	0.212236	0.197082	2047	tags=60%, list=23%, signal=46%	Sjc_0008111/Sjc_0005455/Sjc_0001147/Sjc_0004651/Sjc_0006235/Sjc_0001555/Sjc_0005387/Sjc_0004620/Sjc_0005456/Sjc_0000770/Sjc_0008820/Sjc_0007951/Sjc_0004664/Sjc_0005299/Sjc_0002996/Sjc_0006670/Sjc_0008547/Sjc_0002845/Sjc_0006236/Sjc_0005874/Sjc_0007207/Sjc_0008545/Sjc_0005564/Sjc_0006237
GO:0042625	ATPase-coupled ion transmembrane transporter activity	40	-0.625472	-2.01949	0.00230334	0.212236	0.197082	2047	tags=60%, list=23%, signal=46%	Sjc_0008111/Sjc_0005455/Sjc_0001147/Sjc_0004651/Sjc_0006235/Sjc_0001555/Sjc_0005387/Sjc_0004620/Sjc_0005456/Sjc_0000770/Sjc_0008820/Sjc_0007951/Sjc_0004664/Sjc_0005299/Sjc_0002996/Sjc_0006670/Sjc_0008547/Sjc_0002845/Sjc_0006236/Sjc_0005874/Sjc_0007207/Sjc_0008545/Sjc_0005564/Sjc_0006237
GO:0005272	sodium channel activity	15	-0.751041	-1.91117	0.00114379	0.212236	0.197082	700	tags=47%, list=8%, signal=43%	Sjc_0005238/Sjc_0008280/Sjc_0001430/Sjc_0005766/Sjc_0000190/Sjc_0004409/Sjc_0000189
GO:0042626	ATPase-coupled transmembrane transporter activity	61	-0.5247	-1.83388	0.00215506	0.212236	0.197082	2047	tags=49%, list=23%, signal=38%	Sjc_0008111/Sjc_0005455/Sjc_0001147/Sjc_0004651/Sjc_0003636/Sjc_0006235/Sjc_0009178/Sjc_0001555/Sjc_0005804/Sjc_0005387/Sjc_0009179/Sjc_0004620/Sjc_0005456/Sjc_0001824/Sjc_0000770/Sjc_0008820/Sjc_0007951/Sjc_0004664/Sjc_0005299/Sjc_0002996/Sjc_0006670/Sjc_0008547/Sjc_0002845/Sjc_0006236/Sjc_0005874/Sjc_0003764/Sjc_0007207/Sjc_0008545/Sjc_0005564/Sjc_0006237
GO:0016651	oxidoreductase activity, acting on NAD(P)H	46	-0.578124	-1.92074	0.00463885	0.212305	0.197146	1432	tags=43%, list=16%, signal=37%	Sjc_0005151/Sjc_0001841/Sjc_0009445/Sjc_0003094/Sjc_0003364/Sjc_0009284/Sjc_0002412/Sjc_0007263/Sjc_0007032/Sjc_0004116/Sjc_0009105/Sjc_0006031/Sjc_0005478/Sjc_0008703/Sjc_0000647/Sjc_0006635/Sjc_0001389/Sjc_0001151/Sjc_0002632/Sjc_0001388
GO:0016655	oxidoreductase activity, acting on NAD(P)H, quinone or similar compound as acceptor	24	-0.663138	-1.89498	0.00374809	0.212305	0.197146	1656	tags=58%, list=19%, signal=47%	Sjc_0005540/Sjc_0005151/Sjc_0009445/Sjc_0003094/Sjc_0007263/Sjc_0004116/Sjc_0009105/Sjc_0006031/Sjc_0008703/Sjc_0006635/Sjc_0001389/Sjc_0001151/Sjc_0002632/Sjc_0001388
GO:0015078	proton transmembrane transporter activity	59	-0.534822	-1.87194	0.00276787	0.212305	0.197146	1610	tags=49%, list=18%, signal=40%	Sjc_0008726/Sjc_0005387/Sjc_0003314/Sjc_0003096/Sjc_0009292/Sjc_0004620/Sjc_0000770/Sjc_0008820/Sjc_0007951/Sjc_0004664/Sjc_0005299/Sjc_0002996/Sjc_0003792/Sjc_0006670/Sjc_0005515/Sjc_0008547/Sjc_0001790/Sjc_0003281/Sjc_0002845/Sjc_0005874/Sjc_0007207/Sjc_0005896/Sjc_0006511/Sjc_0003419/Sjc_0008545/Sjc_0005564/Sjc_0000803/Sjc_0000272/Sjc_0001593
GO:0016209	antioxidant activity	30	-0.613592	-1.84869	0.00827903	0.212305	0.197146	1428	tags=43%, list=16%, signal=36%	Sjc_0002388/Sjc_0001841/Sjc_0005309/Sjc_0006577/Sjc_0008539/Sjc_0004169/Sjc_0000647/Sjc_0005875/Sjc_0002015/Sjc_0006542/Sjc_0005754/Sjc_0008538/Sjc_0002499
GO:0044769	ATPase activity, coupled to transmembrane movement of ions, rotational mechanism	21	-0.66413	-1.83961	0.0090115	0.212305	0.197146	1526	tags=86%, list=17%, signal=71%	Sjc_0009191/Sjc_0008111/Sjc_0001147/Sjc_0005387/Sjc_0004620/Sjc_0000770/Sjc_0008820/Sjc_0007951/Sjc_0004664/Sjc_0005299/Sjc_0002996/Sjc_0006670/Sjc_0008547/Sjc_0002845/Sjc_0005874/Sjc_0007207/Sjc_0008545/Sjc_0005564
GO:0004298	threonine-type endopeptidase activity	13	-0.726166	-1.79396	0.00707921	0.212305	0.197146	1870	tags=77%, list=21%, signal=61%	Sjc_0005848/Sjc_0002578/Sjc_0009010/Sjc_0006686/Sjc_0003947/Sjc_0001467/Sjc_0003851/Sjc_0008991/Sjc_0001199/Sjc_0007462
GO:0070003	threonine-type peptidase activity	13	-0.726166	-1.79396	0.00707921	0.212305	0.197146	1870	tags=77%, list=21%, signal=61%	Sjc_0005848/Sjc_0002578/Sjc_0009010/Sjc_0006686/Sjc_0003947/Sjc_0001467/Sjc_0003851/Sjc_0008991/Sjc_0001199/Sjc_0007462
GO:0005178	integrin binding	48	-0.532955	-1.78559	0.00680625	0.212305	0.197146	1150	tags=38%, list=13%, signal=33%	Sjc_0008960/Sjc_0003038/Sjc_0009131/Sjc_0003306/Sjc_0002935/Sjc_0001688/Sjc_0000868/Sjc_0008962/Sjc_0002791/Sjc_0008973/Sjc_0000867/Sjc_0002621/Sjc_0009705/Sjc_0008961/Sjc_0002622/Sjc_0009704/Sjc_0006882/Sjc_0006881
GO:0015399	primary active transmembrane transporter activity	70	-0.491838	-1.76526	0.0100049	0.212305	0.197146	2047	tags=46%, list=23%, signal=35%	Sjc_0008111/Sjc_0005455/Sjc_0001147/Sjc_0004651/Sjc_0003636/Sjc_0006235/Sjc_0009178/Sjc_0001555/Sjc_0005804/Sjc_0005387/Sjc_0009179/Sjc_0004620/Sjc_0005456/Sjc_0001824/Sjc_0000770/Sjc_0008820/Sjc_0007951/Sjc_0004664/Sjc_0005299/Sjc_0002996/Sjc_0006670/Sjc_0008547/Sjc_0002845/Sjc_0006236/Sjc_0005874/Sjc_0003185/Sjc_0003764/Sjc_0007207/Sjc_0004983/Sjc_0008545/Sjc_0005564/Sjc_0006237
GO:0015662	P-type ion transporter activity	23	-0.628131	-1.75868	0.00403543	0.212305	0.197146	2001	tags=48%, list=23%, signal=37%	Sjc_0005455/Sjc_0006235/Sjc_0001555/Sjc_0005456/Sjc_0008820/Sjc_0004664/Sjc_0002996/Sjc_0008547/Sjc_0006236/Sjc_0007207/Sjc_0006237
GO:0002020	protease binding	54	-0.508095	-1.73089	0.00977369	0.212305	0.197146	1080	tags=30%, list=12%, signal=26%	Sjc_0005700/Sjc_0006099/Sjc_0002174/Sjc_0008935/Sjc_0006084/Sjc_0007728/Sjc_0002621/Sjc_0001877/Sjc_0003515/Sjc_0006085/Sjc_0003432/Sjc_0002622/Sjc_0006100/Sjc_0006976/Sjc_0003431/Sjc_0001878
GO:0051082	unfolded protein binding	61	-0.493782	-1.72581	0.00695402	0.212305	0.197146	1860	tags=44%, list=21%, signal=35%	Sjc_0003147/Sjc_0004788/Sjc_0005242/Sjc_0001060/Sjc_0004059/Sjc_0005085/Sjc_0001240/Sjc_0006916/Sjc_0006899/Sjc_0005082/Sjc_0004663/Sjc_0000225/Sjc_0002859/Sjc_0004427/Sjc_0005700/Sjc_0006495/Sjc_0005157/Sjc_0004114/Sjc_0004078/Sjc_0009146/Sjc_0000823/Sjc_0004074/Sjc_0002791/Sjc_0003799/Sjc_0001710/Sjc_0005426/Sjc_0000224
GO:0003746	translation elongation factor activity	11	-0.730584	-1.72546	0.00802609	0.212305	0.197146	2300	tags=91%, list=26%, signal=67%	Sjc_0001945/Sjc_0004329/Sjc_0001735/Sjc_0005914/Sjc_0001902/Sjc_0002904/Sjc_0000271/Sjc_0004527/Sjc_0000607/Sjc_0007360
GO:0008137	NADH dehydrogenase (ubiquinone) activity	22	-0.618688	-1.72529	0.00973864	0.212305	0.197146	1656	tags=55%, list=19%, signal=44%	Sjc_0005540/Sjc_0005151/Sjc_0009445/Sjc_0003094/Sjc_0007263/Sjc_0004116/Sjc_0009105/Sjc_0006031/Sjc_0008703/Sjc_0006635/Sjc_0001151/Sjc_0002632
GO:0050136	NADH dehydrogenase (quinone) activity	22	-0.618688	-1.72529	0.00973864	0.212305	0.197146	1656	tags=55%, list=19%, signal=44%	Sjc_0005540/Sjc_0005151/Sjc_0009445/Sjc_0003094/Sjc_0007263/Sjc_0004116/Sjc_0009105/Sjc_0006031/Sjc_0008703/Sjc_0006635/Sjc_0001151/Sjc_0002632
GO:0044183	protein folding chaperone	16	-0.669847	-1.72431	0.0102038	0.212305	0.197146	1530	tags=69%, list=17%, signal=57%	Sjc_0001060/Sjc_0005085/Sjc_0006916/Sjc_0006899/Sjc_0005700/Sjc_0006495/Sjc_0004114/Sjc_0004074/Sjc_0002791/Sjc_0005426/Sjc_0004984
GO:0004601	peroxidase activity	19	-0.636652	-1.7138	0.00963038	0.212305	0.197146	1268	tags=42%, list=14%, signal=36%	Sjc_0006577/Sjc_0008539/Sjc_0004169/Sjc_0005875/Sjc_0002015/Sjc_0006542/Sjc_0005754/Sjc_0008538
GO:0005217	intracellular ligand-gated ion channel activity	19	-0.634096	-1.70692	0.00963038	0.212305	0.197146	700	tags=32%, list=8%, signal=29%	Sjc_0005238/Sjc_0008280/Sjc_0001877/Sjc_0001878/Sjc_0000190/Sjc_0000189
GO:0003954	NADH dehydrogenase activity	26	-0.589048	-1.69164	0.00941943	0.212305	0.197146	1656	tags=50%, list=19%, signal=41%	Sjc_0005540/Sjc_0005151/Sjc_0009445/Sjc_0003094/Sjc_0002412/Sjc_0007263/Sjc_0004116/Sjc_0009105/Sjc_0006031/Sjc_0008703/Sjc_0006635/Sjc_0001151/Sjc_0002632
GO:0008324	cation transmembrane transporter activity	240	-0.350739	-1.50558	0.00397172	0.212305	0.197146	1612	tags=28%, list=18%, signal=23%	Sjc_0001555/Sjc_0008726/Sjc_0007202/Sjc_0006623/Sjc_0008826/Sjc_0005387/Sjc_0003314/Sjc_0003096/Sjc_0005072/Sjc_0009292/Sjc_0004620/Sjc_0009167/Sjc_0001590/Sjc_0005456/Sjc_0003801/Sjc_0008671/Sjc_0003556/Sjc_0007821/Sjc_0000812/Sjc_0000749/Sjc_0000770/Sjc_0003836/Sjc_0008820/Sjc_0007951/Sjc_0009770/Sjc_0004664/Sjc_0005299/Sjc_0002996/Sjc_0003792/Sjc_0001396/Sjc_0000748/Sjc_0009118/Sjc_0006670/Sjc…
GO:0022890	inorganic cation transmembrane transporter activity	217	-0.349731	-1.48448	0.00512983	0.212305	0.197146	1612	tags=28%, list=18%, signal=23%	Sjc_0001555/Sjc_0008726/Sjc_0006623/Sjc_0005387/Sjc_0003314/Sjc_0003096/Sjc_0005072/Sjc_0009292/Sjc_0004620/Sjc_0001590/Sjc_0005456/Sjc_0003801/Sjc_0008671/Sjc_0000749/Sjc_0000770/Sjc_0003836/Sjc_0008820/Sjc_0007951/Sjc_0009770/Sjc_0004664/Sjc_0005299/Sjc_0002996/Sjc_0003792/Sjc_0001396/Sjc_0000748/Sjc_0009118/Sjc_0006670/Sjc_0005515/Sjc_0009120/Sjc_0008547/Sjc_0001790/Sjc_0003281/Sjc_0005249/Sjc…
GO:0008017	microtubule binding	117	-0.378312	-1.48443	0.00734396	0.212305	0.197146	2305	tags=34%, list=26%, signal=26%	Sjc_0004202/Sjc_0004713/Sjc_0002966/Sjc_0003018/Sjc_0003426/Sjc_0000533/Sjc_0008920/Sjc_0008898/Sjc_0008232/Sjc_0002503/Sjc_0004133/Sjc_0003584/Sjc_0001554/Sjc_0004712/Sjc_0002146/Sjc_0001254/Sjc_0007144/Sjc_0000668/Sjc_0001404/Sjc_0000707/Sjc_0004056/Sjc_0004017/Sjc_0009131/Sjc_0000800/Sjc_0006379/Sjc_0006199/Sjc_0001933/Sjc_0000688/Sjc_0001512/Sjc_0007243/Sjc_0009235/Sjc_0009310/Sjc_0007982/Sjc…
GO:0022857	transmembrane transporter activity	424	-0.294146	-1.34625	0.00636381	0.212305	0.197146	1815	tags=27%, list=21%, signal=23%	Sjc_0003823/Sjc_0007013/Sjc_0004679/Sjc_0002955/Sjc_0003327/Sjc_0000412/Sjc_0006878/Sjc_0003636/Sjc_0006613/Sjc_0006235/Sjc_0007098/Sjc_0009178/Sjc_0001555/Sjc_0008726/Sjc_0007202/Sjc_0005804/Sjc_0006623/Sjc_0006715/Sjc_0005149/Sjc_0008826/Sjc_0005387/Sjc_0003314/Sjc_0000931/Sjc_0009179/Sjc_0003096/Sjc_0009409/Sjc_0005072/Sjc_0009292/Sjc_0004620/Sjc_0009167/Sjc_0007314/Sjc_0001590/Sjc_0005456/Sjc…
GO:0044877	protein-containing complex binding	492	-0.291153	-1.34419	0.00524902	0.212305	0.197146	1880	tags=26%, list=21%, signal=22%	Sjc_0001329/Sjc_0000732/Sjc_0006937/Sjc_0002503/Sjc_0007645/Sjc_0004425/Sjc_0004561/Sjc_0005254/Sjc_0001474/Sjc_0007498/Sjc_0006349/Sjc_0008077/Sjc_0000412/Sjc_0004133/Sjc_0004743/Sjc_0000816/Sjc_0009315/Sjc_0001236/Sjc_0001554/Sjc_0001685/Sjc_0004712/Sjc_0002191/Sjc_0003996/Sjc_0007942/Sjc_0007723/Sjc_0001318/Sjc_0003533/Sjc_0000369/Sjc_0008345/Sjc_0008074/Sjc_0006146/Sjc_0000188/Sjc_0004657/Sjc…
GO:0003779	actin binding	162	-0.363631	-1.4915	0.0110241	0.222205	0.20634	1788	tags=30%, list=20%, signal=24%	Sjc_0001474/Sjc_0007498/Sjc_0006349/Sjc_0003644/Sjc_0004743/Sjc_0001318/Sjc_0006623/Sjc_0007167/Sjc_0000188/Sjc_0004657/Sjc_0004445/Sjc_0003800/Sjc_0006597/Sjc_0000456/Sjc_0005006/Sjc_0001958/Sjc_0001517/Sjc_0006375/Sjc_0007047/Sjc_0000536/Sjc_0008960/Sjc_0006534/Sjc_0000752/Sjc_0003306/Sjc_0000011/Sjc_0002935/Sjc_0000688/Sjc_0006403/Sjc_0006724/Sjc_0000868/Sjc_0008962/Sjc_0000747/Sjc_0001195/Sjc…
GO:0099094	ligand-gated cation channel activity	25	-0.623234	-1.79666	0.0122574	0.237666	0.220697	700	tags=28%, list=8%, signal=26%	Sjc_0005238/Sjc_0008280/Sjc_0001877/Sjc_0001878/Sjc_0000190/Sjc_0004409/Sjc_0000189
GO:0017069	snRNA binding	25	-0.61482	-1.77241	0.0131489	0.237666	0.220697	2144	tags=48%, list=24%, signal=36%	Sjc_0000960/Sjc_0003412/Sjc_0001479/Sjc_0007547/Sjc_0005035/Sjc_0003013/Sjc_0000451/Sjc_0007619/Sjc_0007763/Sjc_0007431/Sjc_0003578/Sjc_0007970
GO:0016614	oxidoreductase activity, acting on CH-OH group of donors	44	-0.534622	-1.75496	0.0132651	0.237666	0.220697	1782	tags=55%, list=20%, signal=44%	Sjc_0008021/Sjc_0007686/Sjc_0004726/Sjc_0006713/Sjc_0000077/Sjc_0003060/Sjc_0003330/Sjc_0007119/Sjc_0002830/Sjc_0002658/Sjc_0001594/Sjc_0001169/Sjc_0006577/Sjc_0009284/Sjc_0004471/Sjc_0003673/Sjc_0006393/Sjc_0004045/Sjc_0001724/Sjc_0004665/Sjc_0008018/Sjc_0001389/Sjc_0002573/Sjc_0001388
GO:0044389	ubiquitin-like protein ligase binding	164	-0.35829	-1.46894	0.012688	0.237666	0.220697	1645	tags=31%, list=19%, signal=26%	Sjc_0005536/Sjc_0001017/Sjc_0007942/Sjc_0005887/Sjc_0006949/Sjc_0008263/Sjc_0002146/Sjc_0005935/Sjc_0009452/Sjc_0007687/Sjc_0008230/Sjc_0009025/Sjc_0002835/Sjc_0005677/Sjc_0009374/Sjc_0008728/Sjc_0003454/Sjc_0002978/Sjc_0008960/Sjc_0000150/Sjc_0005700/Sjc_0000413/Sjc_0000111/Sjc_0001070/Sjc_0003306/Sjc_0002794/Sjc_0005157/Sjc_0007209/Sjc_0000914/Sjc_0001640/Sjc_0002935/Sjc_0001036/Sjc_0004074/Sjc…
GO:0016684	oxidoreductase activity, acting on peroxide as acceptor	21	-0.628355	-1.74052	0.015756	0.257135	0.238776	1329	tags=43%, list=15%, signal=36%	Sjc_0005309/Sjc_0006577/Sjc_0008539/Sjc_0004169/Sjc_0005875/Sjc_0002015/Sjc_0006542/Sjc_0005754/Sjc_0008538
GO:0051536	iron-sulfur cluster binding	21	-0.627075	-1.73697	0.016345	0.257135	0.238776	1854	tags=52%, list=21%, signal=41%	Sjc_0008858/Sjc_0008816/Sjc_0005540/Sjc_0003533/Sjc_0009105/Sjc_0003201/Sjc_0000913/Sjc_0004245/Sjc_0007876/Sjc_0002749/Sjc_0006976
GO:0051540	metal cluster binding	21	-0.627075	-1.73697	0.016345	0.257135	0.238776	1854	tags=52%, list=21%, signal=41%	Sjc_0008858/Sjc_0008816/Sjc_0005540/Sjc_0003533/Sjc_0009105/Sjc_0003201/Sjc_0000913/Sjc_0004245/Sjc_0007876/Sjc_0002749/Sjc_0006976
GO:0042562	hormone binding	38	-0.507159	-1.61257	0.0151105	0.257135	0.238776	1150	tags=42%, list=13%, signal=37%	Sjc_0008960/Sjc_0005700/Sjc_0004929/Sjc_0000562/Sjc_0003306/Sjc_0000303/Sjc_0002935/Sjc_0005424/Sjc_0008962/Sjc_0002791/Sjc_0004983/Sjc_0009705/Sjc_0008961/Sjc_0009704/Sjc_0009386/Sjc_0005423
GO:0031625	ubiquitin protein ligase binding	157	-0.354424	-1.4417	0.015185	0.257135	0.238776	1645	tags=31%, list=19%, signal=25%	Sjc_0005536/Sjc_0001017/Sjc_0007942/Sjc_0005887/Sjc_0006949/Sjc_0002146/Sjc_0005935/Sjc_0007687/Sjc_0008230/Sjc_0009025/Sjc_0002835/Sjc_0005677/Sjc_0009374/Sjc_0008728/Sjc_0003454/Sjc_0008960/Sjc_0000150/Sjc_0005700/Sjc_0000413/Sjc_0000111/Sjc_0001070/Sjc_0003306/Sjc_0002794/Sjc_0005157/Sjc_0007209/Sjc_0000914/Sjc_0001640/Sjc_0002935/Sjc_0001036/Sjc_0004074/Sjc_0008962/Sjc_0002791/Sjc_0003149/Sjc…
GO:0016616	oxidoreductase activity, acting on the CH-OH group of donors, NAD or NADP as acceptor	40	-0.542727	-1.75233	0.0180929	0.257656	0.239259	1675	tags=55%, list=19%, signal=45%	Sjc_0008021/Sjc_0007686/Sjc_0004726/Sjc_0006713/Sjc_0000077/Sjc_0003060/Sjc_0007119/Sjc_0002830/Sjc_0002658/Sjc_0001594/Sjc_0001169/Sjc_0006577/Sjc_0004471/Sjc_0003673/Sjc_0006393/Sjc_0004045/Sjc_0001724/Sjc_0004665/Sjc_0008018/Sjc_0001389/Sjc_0002573/Sjc_0001388
GO:0051117	ATPase binding	53	-0.50788	-1.72163	0.0175917	0.257656	0.239259	2199	tags=51%, list=25%, signal=38%	Sjc_0005919/Sjc_0002672/Sjc_0006071/Sjc_0003426/Sjc_0008232/Sjc_0004568/Sjc_0003523/Sjc_0009242/Sjc_0006623/Sjc_0006146/Sjc_0007687/Sjc_0008728/Sjc_0002859/Sjc_0000451/Sjc_0000770/Sjc_0008820/Sjc_0005790/Sjc_0007209/Sjc_0001291/Sjc_0005249/Sjc_0005432/Sjc_0008280/Sjc_0007207/Sjc_0009285/Sjc_0000306/Sjc_0007970/Sjc_0008804
GO:0046961	proton-transporting ATPase activity, rotational mechanism	15	-0.655731	-1.66863	0.0183755	0.257656	0.239259	1377	tags=73%, list=16%, signal=62%	Sjc_0004620/Sjc_0000770/Sjc_0008820/Sjc_0007951/Sjc_0004664/Sjc_0005299/Sjc_0002996/Sjc_0006670/Sjc_0008547/Sjc_0005874/Sjc_0007207
GO:0051010	microtubule plus-end binding	10	-0.713616	-1.63704	0.017459	0.257656	0.239259	1326	tags=40%, list=15%, signal=34%	Sjc_0000707/Sjc_0004056/Sjc_0009310/Sjc_0000708
GO:0016903	oxidoreductase activity, acting on the aldehyde or oxo group of donors	18	-0.609977	-1.60038	0.0173652	0.257656	0.239259	1308	tags=44%, list=15%, signal=38%	Sjc_0009249/Sjc_0004471/Sjc_0001512/Sjc_0005414/Sjc_0003021/Sjc_0007140/Sjc_0008018/Sjc_0006467
GO:0042805	actinin binding	17	-0.630873	-1.63963	0.0192521	0.264204	0.24534	586	tags=41%, list=7%, signal=39%	Sjc_0004743/Sjc_0006623/Sjc_0005810/Sjc_0008280/Sjc_0000256/Sjc_0009285/Sjc_0000306
GO:0008233	peptidase activity	250	-0.315676	-1.36089	0.0235414	0.316337	0.293751	1892	tags=34%, list=22%, signal=27%	Sjc_0007399/Sjc_0009584/Sjc_0004985/Sjc_0005848/Sjc_0005491/Sjc_0003147/Sjc_0006937/Sjc_0001062/Sjc_0008297/Sjc_0005575/Sjc_0005154/Sjc_0009443/Sjc_0006101/Sjc_0004633/Sjc_0003727/Sjc_0001612/Sjc_0000153/Sjc_0002191/Sjc_0005887/Sjc_0008345/Sjc_0002277/Sjc_0003598/Sjc_0002578/Sjc_0003931/Sjc_0000050/Sjc_0005000/Sjc_0005093/Sjc_0001779/Sjc_0009010/Sjc_0007387/Sjc_0009746/Sjc_0001372/Sjc_0000033/Sjc…
GO:0005201	extracellular matrix structural constituent	12	-0.690433	-1.67062	0.0244111	0.32133	0.298387	1149	tags=75%, list=13%, signal=65%	Sjc_0006166/Sjc_0001926/Sjc_0000808/Sjc_0000684/Sjc_0006493/Sjc_0002134/Sjc_0005376/Sjc_0005375/Sjc_0000685
GO:0043125	ErbB-3 class receptor binding	14	-0.656165	-1.66292	0.0272398	0.351393	0.326304	1150	tags=57%, list=13%, signal=50%	Sjc_0008960/Sjc_0001274/Sjc_0003306/Sjc_0002935/Sjc_0008962/Sjc_0009705/Sjc_0008961/Sjc_0009704
GO:0016818	hydrolase activity, acting on acid anhydrides, in phosphorus-containing anhydrides	442	-0.276376	-1.26696	0.0285859	0.361528	0.335715	2262	tags=32%, list=26%, signal=25%	Sjc_0003943/Sjc_0009191/Sjc_0004329/Sjc_0000754/Sjc_0001735/Sjc_0006669/Sjc_0008822/Sjc_0005919/Sjc_0006685/Sjc_0008302/Sjc_0002406/Sjc_0005914/Sjc_0003841/Sjc_0006071/Sjc_0005328/Sjc_0004186/Sjc_0007087/Sjc_0000397/Sjc_0007783/Sjc_0008111/Sjc_0006912/Sjc_0007454/Sjc_0003412/Sjc_0005301/Sjc_0005455/Sjc_0004771/Sjc_0002644/Sjc_0001406/Sjc_0001147/Sjc_0007743/Sjc_0008968/Sjc_0004651/Sjc_0000732/Sjc…
GO:1990381	ubiquitin-specific protease binding	14	-0.645482	-1.63585	0.0320552	0.382881	0.355544	438	tags=29%, list=5%, signal=27%	Sjc_0003454/Sjc_0003515/Sjc_0003432/Sjc_0003431
GO:0048408	epidermal growth factor binding	15	-0.625666	-1.59213	0.0311164	0.382881	0.355544	1150	tags=53%, list=13%, signal=46%	Sjc_0008960/Sjc_0003306/Sjc_0002935/Sjc_0008962/Sjc_0004983/Sjc_0009705/Sjc_0008961/Sjc_0009704
GO:0015318	inorganic molecular entity transmembrane transporter activity	315	-0.290387	-1.28249	0.0318876	0.382881	0.355544	1612	tags=25%, list=18%, signal=21%	Sjc_0001555/Sjc_0008726/Sjc_0007202/Sjc_0006623/Sjc_0006715/Sjc_0005387/Sjc_0003314/Sjc_0003096/Sjc_0009409/Sjc_0005072/Sjc_0009292/Sjc_0004620/Sjc_0009167/Sjc_0001590/Sjc_0005456/Sjc_0003801/Sjc_0003780/Sjc_0008671/Sjc_0009488/Sjc_0007335/Sjc_0007821/Sjc_0000812/Sjc_0000749/Sjc_0000770/Sjc_0003836/Sjc_0008820/Sjc_0007951/Sjc_0009770/Sjc_0006582/Sjc_0004664/Sjc_0005299/Sjc_0002787/Sjc_0002996/Sjc…
GO:0022824	transmitter-gated ion channel activity	15	0.715714	1.74068	0.0375092	0.391023	0.363104	1667	tags=53%, list=19%, signal=43%	Sjc_0003188/Sjc_0009644/Sjc_0003309/Sjc_0008133/Sjc_0001485/Sjc_0005454/Sjc_0002356/Sjc_0003470
GO:0022835	transmitter-gated channel activity	15	0.715714	1.74068	0.0375092	0.391023	0.363104	1667	tags=53%, list=19%, signal=43%	Sjc_0003188/Sjc_0009644/Sjc_0003309/Sjc_0008133/Sjc_0001485/Sjc_0005454/Sjc_0002356/Sjc_0003470
GO:0005388	P-type calcium transporter activity	12	-0.66499	-1.60906	0.0375867	0.391023	0.363104	2001	tags=50%, list=23%, signal=39%	Sjc_0005455/Sjc_0006235/Sjc_0001555/Sjc_0005456/Sjc_0006236/Sjc_0006237
GO:0005006	epidermal growth factor-activated receptor activity	13	-0.639861	-1.58075	0.0359586	0.391023	0.363104	1150	tags=54%, list=13%, signal=47%	Sjc_0008960/Sjc_0003306/Sjc_0002935/Sjc_0008962/Sjc_0009705/Sjc_0008961/Sjc_0009704
GO:0003697	single-stranded DNA binding	72	-0.420395	-1.51589	0.0366938	0.391023	0.363104	1553	tags=29%, list=18%, signal=24%	Sjc_0000876/Sjc_0002789/Sjc_0001382/Sjc_0001696/Sjc_0003446/Sjc_0001866/Sjc_0005700/Sjc_0008042/Sjc_0006450/Sjc_0004786/Sjc_0005559/Sjc_0003149/Sjc_0003223/Sjc_0003432/Sjc_0006976/Sjc_0002043/Sjc_0003431/Sjc_0009285/Sjc_0000306/Sjc_0006712/Sjc_0008892
GO:0036002	pre-mRNA binding	26	-0.516441	-1.48313	0.0361947	0.391023	0.363104	500	tags=19%, list=6%, signal=18%	Sjc_0003348/Sjc_0009285/Sjc_0000306/Sjc_0006712/Sjc_0005509
GO:0015081	sodium ion transmembrane transporter activity	49	-0.439672	-1.47781	0.0361947	0.391023	0.363104	1333	tags=31%, list=15%, signal=26%	Sjc_0001590/Sjc_0008671/Sjc_0009770/Sjc_0001396/Sjc_0009118/Sjc_0009120/Sjc_0001790/Sjc_0005238/Sjc_0008280/Sjc_0005961/Sjc_0001430/Sjc_0005766/Sjc_0000190/Sjc_0004409/Sjc_0000189
GO:0016817	hydrolase activity, acting on acid anhydrides	444	-0.27423	-1.2571	0.0372679	0.391023	0.363104	2262	tags=32%, list=26%, signal=25%	Sjc_0003943/Sjc_0009191/Sjc_0004329/Sjc_0000754/Sjc_0001735/Sjc_0006669/Sjc_0008822/Sjc_0005919/Sjc_0006685/Sjc_0008302/Sjc_0002406/Sjc_0005914/Sjc_0003841/Sjc_0006071/Sjc_0005328/Sjc_0004186/Sjc_0007087/Sjc_0000397/Sjc_0007783/Sjc_0008111/Sjc_0006912/Sjc_0007454/Sjc_0003412/Sjc_0005301/Sjc_0005455/Sjc_0004771/Sjc_0002644/Sjc_0001406/Sjc_0001147/Sjc_0007743/Sjc_0008968/Sjc_0004651/Sjc_0000732/Sjc…
GO:0001671	ATPase activator activity	16	-0.595765	-1.53361	0.0400331	0.397252	0.368888	2415	tags=50%, list=27%, signal=36%	Sjc_0004115/Sjc_0006617/Sjc_0004568/Sjc_0007723/Sjc_0002859/Sjc_0001358/Sjc_0002005/Sjc_0001710
GO:0009055	electron transfer activity	49	-0.433308	-1.45642	0.0399068	0.397252	0.368888	2281	tags=49%, list=26%, signal=36%	Sjc_0004658/Sjc_0002161/Sjc_0007057/Sjc_0003060/Sjc_0008039/Sjc_0009112/Sjc_0002981/Sjc_0002830/Sjc_0003533/Sjc_0008345/Sjc_0003314/Sjc_0009249/Sjc_0001070/Sjc_0003792/Sjc_0003281/Sjc_0008703/Sjc_0005289/Sjc_0000647/Sjc_0007228/Sjc_0003862/Sjc_0005896/Sjc_0003419/Sjc_0006635/Sjc_0003043
GO:0043021	ribonucleoprotein complex binding	107	-0.363676	-1.39363	0.0395463	0.397252	0.368888	1533	tags=41%, list=17%, signal=34%	Sjc_0006078/Sjc_0004202/Sjc_0004615/Sjc_0008409/Sjc_0005993/Sjc_0003131/Sjc_0001716/Sjc_0006685/Sjc_0005301/Sjc_0007964/Sjc_0007645/Sjc_0004425/Sjc_0008077/Sjc_0003996/Sjc_0008074/Sjc_0007991/Sjc_0006763/Sjc_0007144/Sjc_0000707/Sjc_0001696/Sjc_0005428/Sjc_0001866/Sjc_0005922/Sjc_0006379/Sjc_0006480/Sjc_0004426/Sjc_0007619/Sjc_0001137/Sjc_0007194/Sjc_0007360/Sjc_0006700/Sjc_0000508/Sjc_0004983/Sjc…
GO:0001042	RNA polymerase I core binding	13	-0.623931	-1.5414	0.0433201	0.400087	0.371521	1150	tags=54%, list=13%, signal=47%	Sjc_0008960/Sjc_0003306/Sjc_0002935/Sjc_0008962/Sjc_0009705/Sjc_0008961/Sjc_0009704
GO:0016620	oxidoreductase activity, acting on the aldehyde or oxo group of donors, NAD or NADP as acceptor	17	-0.588902	-1.53055	0.0434203	0.400087	0.371521	1308	tags=41%, list=15%, signal=35%	Sjc_0009249/Sjc_0004471/Sjc_0001512/Sjc_0003021/Sjc_0007140/Sjc_0008018/Sjc_0006467
GO:0005221	intracellular cyclic nucleotide activated cation channel activity	11	-0.645013	-1.52336	0.043325	0.400087	0.371521	700	tags=27%, list=8%, signal=25%	Sjc_0005238/Sjc_0000190/Sjc_0000189
GO:0043855	cyclic nucleotide-gated ion channel activity	11	-0.645013	-1.52336	0.043325	0.400087	0.371521	700	tags=27%, list=8%, signal=25%	Sjc_0005238/Sjc_0000190/Sjc_0000189
GO:0004175	endopeptidase activity	163	-0.332561	-1.36511	0.0430107	0.400087	0.371521	1881	tags=37%, list=21%, signal=30%	Sjc_0004985/Sjc_0005848/Sjc_0003147/Sjc_0006937/Sjc_0001062/Sjc_0008297/Sjc_0005575/Sjc_0006101/Sjc_0004633/Sjc_0001612/Sjc_0002191/Sjc_0005887/Sjc_0008345/Sjc_0002277/Sjc_0003598/Sjc_0002578/Sjc_0003931/Sjc_0001779/Sjc_0009010/Sjc_0009746/Sjc_0000033/Sjc_0004663/Sjc_0007624/Sjc_0000150/Sjc_0001070/Sjc_0006099/Sjc_0006686/Sjc_0004987/Sjc_0000539/Sjc_0006399/Sjc_0003947/Sjc_0002261/Sjc_0002656/Sjc…
GO:0030594	neurotransmitter receptor activity	25	0.671211	1.78667	0.0465143	0.416393	0.386662	1690	tags=48%, list=19%, signal=39%	Sjc_0004493/Sjc_0003188/Sjc_0006547/Sjc_0009644/Sjc_0003309/Sjc_0008133/Sjc_0001485/Sjc_0007980/Sjc_0005454/Sjc_0002356/Sjc_0003470/Sjc_0007979
GO:0038131	neuregulin receptor activity	12	-0.642921	-1.55566	0.0490633	0.416393	0.386662	1150	tags=58%, list=13%, signal=51%	Sjc_0008960/Sjc_0003306/Sjc_0002935/Sjc_0008962/Sjc_0009705/Sjc_0008961/Sjc_0009704
GO:0038132	neuregulin binding	12	-0.642921	-1.55566	0.0490633	0.416393	0.386662	1150	tags=58%, list=13%, signal=51%	Sjc_0008960/Sjc_0003306/Sjc_0002935/Sjc_0008962/Sjc_0009705/Sjc_0008961/Sjc_0009704
GO:0060590	ATPase regulator activity	24	-0.539405	-1.54141	0.0479059	0.416393	0.386662	2649	tags=54%, list=30%, signal=38%	Sjc_0004802/Sjc_0004115/Sjc_0006617/Sjc_0004568/Sjc_0007723/Sjc_0009242/Sjc_0002859/Sjc_0004134/Sjc_0001358/Sjc_0002005/Sjc_0005432/Sjc_0001710/Sjc_0000760
GO:0019838	growth factor binding	39	-0.455586	-1.45634	0.0475894	0.416393	0.386662	1150	tags=38%, list=13%, signal=34%	Sjc_0008960/Sjc_0006099/Sjc_0003306/Sjc_0005157/Sjc_0002935/Sjc_0008172/Sjc_0008962/Sjc_0004983/Sjc_0000608/Sjc_0009705/Sjc_0008961/Sjc_0006100/Sjc_0009704/Sjc_0008098/Sjc_0005210
GO:0050839	cell adhesion molecule binding	97	-0.366681	-1.39056	0.0463397	0.416393	0.386662	1617	tags=29%, list=18%, signal=24%	Sjc_0007942/Sjc_0006623/Sjc_0006806/Sjc_0005072/Sjc_0006597/Sjc_0005436/Sjc_0008960/Sjc_0003038/Sjc_0009131/Sjc_0003306/Sjc_0002935/Sjc_0008172/Sjc_0003246/Sjc_0001688/Sjc_0000868/Sjc_0008962/Sjc_0002791/Sjc_0008973/Sjc_0000867/Sjc_0002621/Sjc_0008803/Sjc_0009705/Sjc_0008961/Sjc_0007982/Sjc_0002622/Sjc_0009704/Sjc_0006882/Sjc_0006881
GO:0008234	cysteine-type peptidase activity	105	-0.359378	-1.37471	0.051782	0.433758	0.402788	1980	tags=32%, list=23%, signal=25%	Sjc_0003373/Sjc_0006088/Sjc_0004985/Sjc_0001062/Sjc_0008297/Sjc_0005154/Sjc_0005887/Sjc_0002277/Sjc_0003598/Sjc_0003931/Sjc_0000050/Sjc_0001779/Sjc_0001372/Sjc_0000033/Sjc_0007624/Sjc_0000150/Sjc_0004987/Sjc_0007209/Sjc_0002261/Sjc_0002613/Sjc_0001903/Sjc_0005343/Sjc_0003619/Sjc_0000623/Sjc_0005290/Sjc_0002621/Sjc_0002267/Sjc_0002622/Sjc_0002294/Sjc_0000045/Sjc_0002273/Sjc_0002266/Sjc_0002295/Sjc…
GO:0004197	cysteine-type endopeptidase activity	63	-0.42257	-1.48745	0.0530067	0.438324	0.407028	1881	tags=38%, list=21%, signal=30%	Sjc_0004985/Sjc_0001062/Sjc_0008297/Sjc_0005887/Sjc_0002277/Sjc_0003598/Sjc_0003931/Sjc_0001779/Sjc_0000033/Sjc_0007624/Sjc_0000150/Sjc_0004987/Sjc_0002261/Sjc_0002613/Sjc_0001903/Sjc_0005290/Sjc_0002621/Sjc_0002267/Sjc_0002622/Sjc_0002294/Sjc_0002273/Sjc_0002266/Sjc_0002295/Sjc_0002264
GO:0015075	ion transmembrane transporter activity	341	-0.286092	-1.27538	0.054031	0.441139	0.409642	1612	tags=24%, list=18%, signal=20%	Sjc_0001555/Sjc_0008726/Sjc_0007202/Sjc_0006623/Sjc_0006715/Sjc_0005149/Sjc_0008826/Sjc_0005387/Sjc_0003314/Sjc_0003096/Sjc_0009409/Sjc_0005072/Sjc_0009292/Sjc_0004620/Sjc_0009167/Sjc_0001590/Sjc_0005456/Sjc_0003801/Sjc_0003780/Sjc_0008671/Sjc_0003556/Sjc_0009488/Sjc_0007335/Sjc_0007821/Sjc_0000812/Sjc_0000749/Sjc_0000770/Sjc_0003836/Sjc_0008820/Sjc_0007951/Sjc_0009770/Sjc_0006582/Sjc_0004664/Sjc…
GO:0043531	ADP binding	27	-0.506564	-1.4773	0.0555556	0.447908	0.415927	1525	tags=33%, list=17%, signal=28%	Sjc_0006146/Sjc_0000668/Sjc_0007176/Sjc_0000303/Sjc_0005478/Sjc_0005424/Sjc_0007810/Sjc_0003515/Sjc_0005423
GO:0008092	cytoskeletal protein binding	451	-0.260069	-1.19685	0.0562489	0.447908	0.415927	1788	tags=30%, list=20%, signal=25%	Sjc_0003095/Sjc_0002966/Sjc_0005919/Sjc_0009232/Sjc_0001425/Sjc_0000402/Sjc_0004312/Sjc_0002672/Sjc_0003018/Sjc_0003722/Sjc_0009040/Sjc_0003841/Sjc_0006071/Sjc_0003426/Sjc_0001682/Sjc_0000533/Sjc_0007454/Sjc_0008920/Sjc_0007453/Sjc_0008898/Sjc_0005005/Sjc_0009406/Sjc_0008232/Sjc_0002503/Sjc_0009205/Sjc_0001474/Sjc_0007498/Sjc_0006349/Sjc_0002583/Sjc_0003644/Sjc_0004133/Sjc_0004743/Sjc_0003584/Sjc…
GO:0051287	NAD binding	27	-0.504349	-1.47084	0.0576132	0.453177	0.42082	1966	tags=44%, list=22%, signal=35%	Sjc_0003060/Sjc_0002609/Sjc_0002658/Sjc_0009249/Sjc_0003932/Sjc_0007032/Sjc_0003673/Sjc_0004045/Sjc_0007228/Sjc_0001724/Sjc_0004665/Sjc_0002573
GO:0008417	fucosyltransferase activity	15	0.696982	1.69513	0.0597938	0.453449	0.421073	1054	tags=40%, list=12%, signal=35%	Sjc_0002471/Sjc_0004542/Sjc_0002469/Sjc_0002470/Sjc_0005903/Sjc_0007787
GO:0140103	catalytic activity, acting on a glycoprotein	20	0.654209	1.68521	0.059761	0.453449	0.421073	1054	tags=35%, list=12%, signal=31%	Sjc_0002471/Sjc_0004542/Sjc_0002469/Sjc_0002470/Sjc_0005903/Sjc_0000391/Sjc_0007787
GO:0004714	transmembrane receptor protein tyrosine kinase activity	20	-0.535127	-1.44651	0.06	0.453449	0.421073	1452	tags=45%, list=17%, signal=38%	Sjc_0003074/Sjc_0008960/Sjc_0003306/Sjc_0002935/Sjc_0003073/Sjc_0008962/Sjc_0009705/Sjc_0008961/Sjc_0009704
GO:0016462	pyrophosphatase activity	441	-0.272323	-1.24829	0.0604599	0.453449	0.421073	2262	tags=32%, list=26%, signal=25%	Sjc_0003943/Sjc_0009191/Sjc_0004329/Sjc_0000754/Sjc_0001735/Sjc_0006669/Sjc_0008822/Sjc_0005919/Sjc_0006685/Sjc_0008302/Sjc_0002406/Sjc_0005914/Sjc_0003841/Sjc_0006071/Sjc_0005328/Sjc_0004186/Sjc_0007087/Sjc_0000397/Sjc_0007783/Sjc_0008111/Sjc_0006912/Sjc_0007454/Sjc_0003412/Sjc_0005301/Sjc_0005455/Sjc_0004771/Sjc_0002644/Sjc_0001406/Sjc_0001147/Sjc_0007743/Sjc_0008968/Sjc_0004651/Sjc_0000732/Sjc…
GO:0043130	ubiquitin binding	37	-0.46975	-1.48219	0.0612972	0.454445	0.421998	1513	tags=38%, list=17%, signal=31%	Sjc_0002992/Sjc_0004856/Sjc_0006937/Sjc_0005860/Sjc_0009452/Sjc_0007687/Sjc_0003386/Sjc_0008728/Sjc_0002978/Sjc_0004017/Sjc_0007377/Sjc_0001291/Sjc_0005343/Sjc_0001997
GO:0008171	O-methyltransferase activity	12	0.702105	1.59565	0.0648536	0.45468	0.422216	118	tags=17%, list=1%, signal=16%	Sjc_0006663/Sjc_0006662
GO:0050750	low-density lipoprotein particle receptor binding	16	-0.574797	-1.47964	0.0631164	0.45468	0.422216	1303	tags=38%, list=15%, signal=32%	Sjc_0005082/Sjc_0004597/Sjc_0001640/Sjc_0001710/Sjc_0006882/Sjc_0006881
GO:0070325	lipoprotein particle receptor binding	16	-0.574797	-1.47964	0.0631164	0.45468	0.422216	1303	tags=38%, list=15%, signal=32%	Sjc_0005082/Sjc_0004597/Sjc_0001640/Sjc_0001710/Sjc_0006882/Sjc_0006881
GO:0070034	telomerase RNA binding	14	-0.583273	-1.47819	0.0641509	0.45468	0.422216	806	tags=29%, list=9%, signal=26%	Sjc_0007619/Sjc_0002817/Sjc_0007970/Sjc_0002775
GO:0015932	nucleobase-containing compound transmembrane transporter activity	29	-0.487577	-1.45409	0.063745	0.45468	0.422216	2294	tags=48%, list=26%, signal=36%	Sjc_0006065/Sjc_0000554/Sjc_0004123/Sjc_0001848/Sjc_0005455/Sjc_0000412/Sjc_0007098/Sjc_0001555/Sjc_0005149/Sjc_0008826/Sjc_0000931/Sjc_0005456/Sjc_0002716/Sjc_0006712
GO:0019003	GDP binding	30	-0.477341	-1.43818	0.0701403	0.486457	0.451724	2707	tags=73%, list=31%, signal=51%	Sjc_0004508/Sjc_0000449/Sjc_0000782/Sjc_0000241/Sjc_0006957/Sjc_0004424/Sjc_0001750/Sjc_0006617/Sjc_0000754/Sjc_0005919/Sjc_0006071/Sjc_0007454/Sjc_0007964/Sjc_0004568/Sjc_0000816/Sjc_0001280/Sjc_0009284/Sjc_0005974/Sjc_0003678/Sjc_0006908/Sjc_0007140/Sjc_0007810
GO:0019199	transmembrane receptor protein kinase activity	23	-0.51516	-1.44237	0.0712831	0.489123	0.4542	1452	tags=39%, list=17%, signal=33%	Sjc_0003074/Sjc_0008960/Sjc_0003306/Sjc_0002935/Sjc_0003073/Sjc_0008962/Sjc_0009705/Sjc_0008961/Sjc_0009704
