# Supplementary material for: Dynamic single-cell transcriptomics reveals lsamp-guided neural network formation in male S. japonicum driving female reproduction
Source: Research Square preprint supplement (doi:10.21203/rs.3.rs-6983189/v1), 2025-07-10
Supplement: Supplementary file 12 [file b30c7ce20963e09b8d3a134a.xlsx]

## Sheet: Sheet1
Table S8. Highly expressed genes in male gametogenesis in S. japonicum.
gene	pval	qval	range_pr	Gene_Name	Annotation	cluster
Sjc-0002380	4.39125e-132	4.54267e-130	3.70217	CCAR1	Similar to CCAR1: Cell division cycle and apoptosis regulator protein 1	C1
Sjc-0004554	8.14515e-131	7.1869e-129	3.71575	RSP-6	Similar to Srsf7: Serine/arginine-rich splicing factor 7	C1
Sjc-0005700	6.12154e-127	4.17377e-125	3.74993	HSPD1	Similar to HSPD1: 60 kDa heat shock protein%2C mitochondrial	C1
Sjc-0006712	9.23296e-120	4.13416e-118	3.61608	HNRNPA2B1	Similar to HNRNPA2B1: Heterogeneous nuclear ribonucleoproteins A2/B1	C1
Sjc-0003223	7.77234e-107	2.26379e-105	3.26334	FUBP1	Similar to FUBP3: Far upstream element-binding protein 3	C1
Sjc-0002087	1.26286e-99	2.78571e-98	3.17837	DDX39A	Similar to DDX39B: Spliceosome RNA helicase DDX39B	C1
Sjc-0009131	5.68178e-95	1.02683e-93	3.50777	ANP32A	Similar to SMV0119: Acidic leucine-rich nuclear phosphoprotein 32-related protein	C1
Sjc-0005336	1.41269e-93	2.44976e-92	2.74798	SJC_0005336	Similar to Probable protein disulfide-isomerase ER-60	C1
Sjc-0005758	2.13527e-89	3.20291e-88	2.87374	TCERG1	Similar to Tcerg1: Transcription elongation regulator 1	C1
Sjc-0006749	3.24708e-88	4.50984e-87	2.72643	SJC_0006749	Ribosome-binding protein 1 , putative	C1
Sjc-0005387	1.09306e-87	1.4838e-86	2.63207	ATP5A1	Similar to ATP5F1A: ATP synthase subunit alpha%2C mitochondrial	C1
Sjc-0002791	1.07141e-83	1.25556e-82	2.5769	CALR	Similar to Calreticulin	C1
Sjc-0009372	2.06497e-83	2.38265e-82	2.61935	YWHAB-A	Similar to ywhab-a: 14-3-3 protein beta/alpha-A	C1
Sjc-0007970	1.2084e-78	1.17701e-77	2.91303	SNRPB	Similar to SNRPN: Small nuclear ribonucleoprotein-associated protein N	C1
Sjc-0003083	1.10511e-77	1.02961e-76	2.39215	PHF5A	Similar to PHF5A: PHD finger-like domain-containing protein 5A	C1
Sjc-0005559	3.6992e-72	2.85286e-71	2.56435	DSP1	Similar to Dsp1: High mobility group protein DSP1	C1
Sjc-0001045	6.18895e-69	4.32793e-68	1.9913	CALU	Similar to calua: Calumenin-A	C1
Sjc-0002435	4.81404e-68	3.24542e-67	2.01806	RBM39	Similar to RBM39: RNA-binding protein 39	C1
Sjc-0003996	1.20161e-67	7.90533e-67	2.26298	CSNK2A2	Similar to Casein kinase II subunit alpha	C1
Sjc-0005830	1.24524e-65	7.7344e-65	1.81524	TFAP4	Similar to TFAP4: Transcription factor AP-4	C1
Sjc-0005499	1.34937e-64	8.12872e-64	2.26965	PPIB	Similar to Peptidyl-prolyl cis-trans isomerase B	C1
Sjc-0005803	1.55629e-64	9.31911e-64	1.95528	TSPAN1	Similar to Tspan1: Tetraspanin-1	C1
Sjc-0002513	1.98798e-62	1.09833e-61	2.2502	TMEM258	Similar to TMEM258: Transmembrane protein 258	C1
Sjc-0000940	4.52717e-62	2.45597e-61	2.59326	SJC_0000940	Similar to 14-3-3 protein homolog 1	C1
Sjc-0005379	1.934e-61	1.02872e-60	1.78981	AGGF1	putative g patch domain-containing protein 1	C1
Sjc-0008252	9.81271e-59	4.70258e-58	1.94393	EPRS	Similar to EPRS: Bifunctional glutamate/proline--tRNA ligase	C1
Sjc-0000519	2.64482e-57	1.21508e-56	1.87407	PDIA6	Similar to CaBP1: Protein disulfide-isomerase A6 homolog	C1
Sjc-0000804	1.25787e-55	5.53317e-55	1.8516	SJC_0000804	SJCHGC03780 protein	C1
Sjc-0003116	7.96912e-55	3.43004e-54	2.14371	SMARCA4	Similar to Smarca4: Transcription activator BRG1	C1
Sjc-0008281	2.41997e-54	1.02978e-53	2.05916	CDK1	Similar to cdk1: Cyclin-dependent kinase 1	C1
Sjc-0002798	1.04178e-53	4.37722e-53	1.78249	GINS3	Similar to psf3: DNA replication complex GINS protein psf3	C1
Sjc-0003467	1.65106e-53	6.90819e-53	1.82581	CSTF3	Similar to CSTF3: Cleavage stimulation factor subunit 3	C1
Sjc-0002943	1.18491e-51	4.62854e-51	1.88071	CCAR1	Similar to CCAR1: Cell division cycle and apoptosis regulator protein 1	C1
Sjc-0001519	1.31547e-51	5.1053e-51	1.81664	BOLA1	Similar to bolA: DNA-binding transcriptional regulator BolA	C1
Sjc-0006693	2.97195e-50	1.1117e-49	2.33886	TUBA1A	Similar to TUBA1A: Tubulin alpha-1A chain	C1
Sjc-0001696	1.92095e-49	7.02788e-49	1.91975	DHX9	Similar to DHX9: ATP-dependent RNA helicase A	C1
Sjc-0004525	7.51075e-48	2.5929e-47	1.94383	LMNB1	Similar to Lamin-L	C1
Sjc-0003745	3.74907e-45	1.18019e-44	1.87201	HNRNPUL1	Similar to Hnrnpul1: Heterogeneous nuclear ribonucleoprotein U-like protein 1	C1
Sjc-0003382	9.81271e-42	2.74866e-41	1.82993	NIPBL	Similar to Nipbl: Nipped-B-like protein	C1
Sjc-0002372	2.17344e-40	5.89008e-40	1.98793	SJC_0002372	SJCHGC02101 protein	C1
Sjc-0004527	1.10124e-195	1.95986e-192	4.71511	EEF1B2	Similar to EEF1B: Elongation factor 1-beta	C2
Sjc-0008229	5.4456e-143	8.59831e-141	3.85206	SNRPE	Similar to snrpe: Small nuclear ribonucleoprotein E	C2
Sjc-0003122	1.97592e-139	2.82274e-137	3.93374	NUTF2	Nuclear transport factor 2	C2
Sjc-0001233	1.03523e-137	1.41167e-135	3.47955	GLRX3	Similar to glrx3: Glutaredoxin-3	C2
Sjc-0004669	1.69923e-135	2.21639e-133	3.42793	PRMT8	Similar to prmt1: Protein arginine N-methyltransferase 1	C2
Sjc-0005410	4.21275e-135	5.26594e-133	3.20577	RBM8A	Similar to RBM8A: RNA-binding protein 8A	C2
Sjc-0000713	1.68823e-130	1.40686e-128	3.53486	RPS8	Similar to RpS8: 40S ribosomal protein S8	C2
Sjc-0008892	1.84299e-130	1.49432e-128	3.7061	NME1	Similar to Nucleoside diphosphate kinase	C2
Sjc-0006472	6.20839e-130	4.90136e-128	3.41169	RPL10A	Similar to rpl10a: 60S ribosomal protein L10a	C2
Sjc-0008452	1.26899e-125	8.27601e-124	3.48371	EIF4EBP3	eukaryotic translation initiation factor 4E-binding protein 2	C2
Sjc-0003248	4.15851e-125	2.54602e-123	3.6968	RPL32	Similar to RpL32: 60S ribosomal protein L32	C2
Sjc-0004287	1.94598e-123	1.04249e-121	3.07994	CLNS1A	chloride channel, nucleotide-sensitive, 1A	C2
Sjc-0005438	4.25173e-122	2.12587e-120	3.23606	NAP1	Similar to nap1l1: Nucleosome assembly protein 1-like 1	C2
Sjc-0001866	3.74304e-121	1.7824e-119	3.44416	YBX2	Similar to ybx2-a: Y-box-binding protein 2-A	C2
Sjc-0003482	4.28949e-120	1.94977e-118	3.57562	SNRPD1	Similar to SNRPD1: Small nuclear ribonucleoprotein Sm D1	C2
Sjc-0001944	4.03528e-118	1.78027e-116	3.27158	EIF4A2	Similar to tif1: ATP-dependent RNA helicase eIF4A	C2
Sjc-0006403	3.78986e-114	1.51594e-112	2.813	MSRB2	Similar to Msrb2: Methionine-R-sulfoxide reductase B2%2C mitochondrial	C2
Sjc-0001902	9.59433e-114	3.69013e-112	2.91252	EEF1D	Similar to EEF1B: Elongation factor 1-beta	C2
Sjc-0008562	4.55099e-112	1.64494e-110	2.56298	SJC_0008562	hypothetical protein	C2
Sjc-0002913	1.45946e-111	4.91954e-110	3.22981	RPL6	Similar to Rpl6: 60S ribosomal protein L6	C2
Sjc-0008282	1.54674e-105	4.33666e-104	2.56676	SJC_0008282	hypothetical protein	C2
Sjc-0002651	1.10695e-104	3.01896e-103	2.52196	MRTO4	Similar to Endoglycoceramidase	C2
Sjc-0008042	1.8354e-104	4.87274e-103	3.00549	ALYREF	Similar to alyref-a: THO complex subunit 4-A	C2
Sjc-0002950	9.56444e-104	2.51696e-102	2.63786	USP14	Similar to USP14: Ubiquitin carboxyl-terminal hydrolase 14	C2
Sjc-0001046	3.91437e-103	1.00368e-101	3.07631	RPS5	Similar to RpS5a: 40S ribosomal protein S5a	C2
Sjc-0007299	8.46981e-101	1.96972e-99	2.80637	GDI2	Similar to Gdi1: Rab GDP dissociation inhibitor alpha	C2
Sjc-0003046	2.00802e-100	4.59852e-99	2.58507	EXOSC4	Similar to exos-4.1: Putative exosome complex component RRP41	C2
Sjc-0008250	3.48409e-100	7.91839e-99	2.62415	TOMM22	Mitochondrial import receptor subunit TOM22 homolog	C2
Sjc-0006495	1.76432e-99	3.86348e-98	2.99956	CCT3	Similar to CCT3: T-complex protein 1 subunit gamma	C2
Sjc-0005790	4.5343e-99	9.85718e-98	2.42577	NOP58	Similar to NOP58: Nucleolar protein 58	C2
Sjc-0001253	1.35372e-98	2.9217e-97	2.56882	PNO1	Similar to PNO1: RNA-binding protein PNO1	C2
Sjc-0008365	2.6643e-98	5.70922e-97	3.18788	RPS24	Similar to rps24: 40S ribosomal protein S24	C2
Sjc-0005754	2.29693e-96	4.53341e-95	3.02887	JAFRAC1	Similar to Thioredoxin peroxidase	C2
Sjc-0003381	8.34997e-96	1.61612e-94	2.83878	SJC_0003381	hypothetical protein	C2
Sjc-0009456	9.17356e-96	1.76415e-94	2.3836	SJC_0009456	SJCHGC09023 protein	C2
Sjc-0005536	3.49779e-95	6.57227e-94	2.79575	RPL23	Similar to rpl-23: 60S ribosomal protein L23	C2
Sjc-0008773	3.51325e-95	6.57227e-94	2.6736	ARHGDIA	Similar to Arhgdig: Rho GDP-dissociation inhibitor 3	C2
Sjc-0001573	4.455e-95	8.25001e-94	2.85828	RPL5	Similar to RPL5: 60S ribosomal protein L5	C2
Sjc-0003908	7.3723e-94	1.28587e-92	2.56398	PES1	Similar to pes1: Pescadillo homolog	C2
Sjc-0006359	2.8195e-93	4.83343e-92	2.90847	RPL29	Similar to RPL29: 60S ribosomal protein L29	C2
Sjc-0009127	7.89321e-93	1.33032e-91	2.35729	MRPL53	mitochondrial ribosomal protein l53	C2
Sjc-0005854	1.4274e-92	2.36586e-91	2.29714	DIEXF	Similar to diexf: Digestive organ expansion factor homolog	C2
Sjc-0005848	1.32646e-91	2.13945e-90	2.73773	PSMA3	Similar to Psma3: Proteasome subunit alpha type-3	C2
Sjc-0005841	3.65665e-91	5.80421e-90	2.70685	BUD31	Similar to Protein BUD31 homolog	C2
Sjc-0004681	7.28225e-90	1.11463e-88	2.50182	TRMT112	Similar to TRMT112: Multifunctional methyltransferase subunit TRM112-like protein	C2
Sjc-0002306	1.66365e-88	2.37664e-87	2.12219	EBNA1BP2	Similar to Ebna1bp2: Probable rRNA-processing protein EBP2	C2
Sjc-0008098	2.08753e-88	2.95406e-87	2.61761	RPL37	Similar to RPL37: 60S ribosomal protein L37	C2
Sjc-0008559	2.14787e-88	3.02518e-87	2.3659	NOB1	Similar to Nob1: RNA-binding protein NOB1	C2
Sjc-0002453	1.14895e-87	1.55264e-86	2.20629	EMC8	Similar to EMC9: ER membrane protein complex subunit 9	C2
Sjc-0000036	5.1952e-87	6.78697e-86	2.78497	RPL18	Similar to RpL18: 60S ribosomal protein L18	C2
Sjc-0002350	2.76693e-86	3.51728e-85	2.76295	SJC_0002350	nAChR subunit ShAR1 beta2	C2
Sjc-0003950	1.1523e-85	1.45248e-84	2.72774	RPS23	Similar to RPS23: 40S ribosomal protein S23	C2
Sjc-0001512	3.14055e-85	3.9094e-84	3.02051	GAPDH	Similar to Glyceraldehyde-3-phosphate dehydrogenase	C2
Sjc-0004094	7.52954e-85	9.25763e-84	2.29799	PDCD5	Similar to PDCD5: Programmed cell death protein 5	C2
Sjc-0004074	2.94163e-84	3.52995e-83	2.52654	CCT2	Similar to CCT2: T-complex protein 1 subunit beta	C2
Sjc-0004070	5.61425e-84	6.71026e-83	2.09044	APRT	Similar to apt: Adenine phosphoribosyltransferase	C2
Sjc-0003507	7.74513e-84	9.22039e-83	2.77901	SJC_0003507	Cytochrome c oxidase subunit VIc	C2
Sjc-0007196	9.30048e-84	1.09848e-82	2.41689	FAM136A	Protein FAM136A	C2
Sjc-0008397	2.84592e-83	3.25868e-82	2.44475	MAT1A	Similar to MAT2A: S-adenosylmethionine synthase isoform type-2	C2
Sjc-0006985	5.69526e-83	6.44746e-82	2.88233	YWHAE	Similar to 14-3-3epsilon: 14-3-3 protein epsilon	C2
Sjc-0004714	8.64043e-83	9.70835e-82	2.64141	NACA	Similar to Nascent polypeptide-associated complex subunit alpha	C2
Sjc-0005666	2.18475e-82	2.41855e-81	2.06001	NOP16	Similar to nol-16: Nucleolar protein 16	C2
Sjc-0003412	2.24101e-82	2.47171e-81	2.28238	DDX21	Similar to Ddx50: ATP-dependent RNA helicase DDX50	C2
Sjc-0002010	2.45067e-82	2.69304e-81	2.85575	RPL13	Similar to RPL13: 60S ribosomal protein L13	C2
Sjc-0007317	1.20028e-81	1.29527e-80	1.98796	POLR2G	Similar to POLR2G: DNA-directed RNA polymerase II subunit RPB7	C2
Sjc-0005143	6.03661e-81	6.39923e-80	2.44945	TTLL9	Similar to CAPRIN1: Caprin-1	C2
Sjc-0007462	1.46669e-80	1.53312e-79	2.28194	PSMA6	Similar to Psma6: Proteasome subunit alpha type-6	C2
Sjc-0000326	2.75332e-80	2.86804e-79	2.47662	RPSA	Similar to SJCHGC06078: 40S ribosomal protein SA	C2
Sjc-0001249	5.50774e-80	5.71738e-79	2.27596	SJC_0001249	SJCHGC00791 protein	C2
Sjc-0008109	3.95584e-79	3.92965e-78	2.51425	SJC_0008109	Metallo-beta-lactamase domain-containing protein 1	C2
Sjc-0004988	9.03895e-79	8.86172e-78	2.24426	POLR2J	Similar to POLR2J: DNA-directed RNA polymerase II subunit RPB11	C2
Sjc-0007239	2.09002e-78	2.0161e-77	2.23178	SJC_0007239	CDS15262.1 expressed conserved protein	C2
Sjc-0003529	3.49642e-78	3.34053e-77	2.11189	TTC4	Similar to Ttc4: Tetratricopeptide repeat protein 4	C2
Sjc-0002661	4.94546e-78	4.68025e-77	2.48806	PABPN1	Similar to Pabpn1l-b: Embryonic polyadenylate-binding protein 2-B	C2
Sjc-0008074	6.53858e-78	6.16847e-77	2.28816	CSNK2B	Similar to CSNK2B: Casein kinase II subunit beta	C2
Sjc-0005014	1.03279e-77	9.65222e-77	2.3502	CDPF1	cysteine-rich DPF motif domain-containing protein 1	C2
Sjc-0005851	2.26027e-77	2.0864e-76	2.03383	SJC_0005851	SJCHGC05187 protein	C2
Sjc-0007737	3.71059e-77	3.38352e-76	2.45595	RPL39	Similar to RpL39: 60S ribosomal protein L39	C2
Sjc-0002514	4.11933e-77	3.74485e-76	2.80849	RPL34	Similar to RpL34: 60S ribosomal protein L34	C2
Sjc-0005808	9.65938e-76	8.49799e-75	2.04568	ACTL6A	Similar to ACTL6A: Actin-like protein 6A	C2
Sjc-0004698	1.07275e-75	9.38264e-75	2.03302	SJC_0004698	SJCHGC05159 protein	C2
Sjc-0001147	1.30067e-75	1.13102e-74	2.39812	ATP5C1	Similar to ATPsyngamma: ATP synthase subunit gamma%2C mitochondrial	C2
Sjc-0000451	1.31158e-75	1.13721e-74	2.39776	NHP2L1	Similar to snu13: NHP2-like protein 1	C2
Sjc-0008912	4.50244e-75	3.81563e-74	2.08224	EIF3D	Similar to eif3d: Eukaryotic translation initiation factor 3 subunit D	C2
Sjc-0001298	1.30086e-74	1.08707e-73	2.71704	RPL28	Similar to Rpl28: 60S ribosomal protein L28	C2
Sjc-0009011	2.04021e-74	1.70018e-73	2.49035	CDC37	Similar to cdc37: Hsp90 co-chaperone Cdc37	C2
Sjc-0006388	3.35951e-74	2.78412e-73	2.40549	PSMA4	Similar to Psma4: Proteasome subunit alpha type-4	C2
Sjc-0001732	3.83664e-74	3.16206e-73	2.28351	AIMP1	Similar to AIMP1: Aminoacyl tRNA synthase complex-interacting multifunctional protein 1	C2
Sjc-0008617	4.28829e-74	3.52463e-73	1.80463	CCDC58	Similar to ccdc58: Coiled-coil domain-containing protein 58	C2
Sjc-0006922	7.68724e-74	6.2329e-73	1.93073	AQR	Similar to AQR: RNA helicase aquarius	C2
Sjc-0004427	4.68851e-73	3.73091e-72	2.30701	NUDC	Similar to NUDC: Nuclear migration protein nudC	C2
Sjc-0005922	8.59367e-73	6.76667e-72	2.59914	SNRPG	Similar to SNRPG: Probable small nuclear ribonucleoprotein G	C2
Sjc-0006341	9.41544e-73	7.39433e-72	2.05639	MND1	Similar to mnd1: Meiotic nuclear division protein 1 homolog	C2
Sjc-0007449	6.87303e-72	5.27342e-71	1.90208	RBM34	Similar to CSTF64: Cleavage stimulating factor 64	C2
Sjc-0004739	7.65456e-72	5.85808e-71	2.2975	LSM6	Similar to LSM6: U6 snRNA-associated Sm-like protein LSm6	C2
Sjc-0001212	7.75119e-72	5.91694e-71	2.11983	RLP7	Similar to RPL7: 60S ribosomal protein L7	C2
Sjc-0007923	8.39843e-72	6.39475e-71	2.49724	RPL11	Similar to rpl-11.2: 60S ribosomal protein L11-2	C2
Sjc-0004451	1.00421e-71	7.60765e-71	2.32429	C1QBP	Complement component 1 Q subcomponent-binding protein, mitochondrial precursor	C2
Sjc-0000510	1.37029e-71	1.03029e-70	2.16475	SJC_0000510	dynein light chain type 1	C2
Sjc-0003763	1.6891e-71	1.26367e-70	2.33567	TPT1	Similar to TCTP: Translationally-controlled tumor protein homolog	C2
Sjc-0000310	6.70308e-71	4.98989e-70	2.18741	PRPF39	Similar to prpf39: Pre-mRNA-processing factor 39	C2
Sjc-0008386	8.8546e-71	6.5752e-70	1.98328	NUDT21	Similar to nudt21: Cleavage and polyadenylation specificity factor subunit 5	C2
Sjc-0003914	1.35551e-70	9.99146e-70	2.29457	RRM2B	Similar to rrm2: Ribonucleoside-diphosphate reductase subunit M2	C2
Sjc-0008691	1.92942e-70	1.41869e-69	2.06971	TIMM13	Similar to timm13-b: Mitochondrial import inner membrane translocase subunit Tim13-B	C2
Sjc-0005725	5.01446e-70	3.63367e-69	2.2127	ILF2	Similar to ILF2: Interleukin enhancer-binding factor 2	C2
Sjc-0001793	6.21953e-70	4.49604e-69	1.73591	NSUN2	Similar to Nsun2: tRNA	C2
Sjc-0003771	7.3926e-70	5.3312e-69	1.92981	NSA2	Similar to NSA2: Ribosome biogenesis protein NSA2 homolog	C2
Sjc-0007528	8.59259e-70	6.16693e-69	2.17453	DTYMK	Similar to dtymk: Thymidylate kinase	C2
Sjc-0003344	1.07184e-69	7.63784e-69	2.03213	CAPSL	Similar to CAPSL: Calcyphosin-like protein	C2
Sjc-0006452	1.84396e-69	1.30777e-68	1.86385	UXT	Similar to Uxt: Protein UXT	C2
Sjc-0003268	1.02101e-68	7.04146e-68	1.95916	METTL18	Similar to METTL18: Histidine protein methyltransferase 1 homolog	C2
Sjc-0002679	1.02697e-68	7.06628e-68	1.98141	RPB-5	Similar to rpb-5: DNA-directed RNA polymerases I%2C II%2C and III subunit RPABC1	C2
Sjc-0005452	1.03914e-68	7.13368e-68	1.9811	HARS	Similar to hars: Histidine--tRNA ligase%2C cytoplasmic	C2
Sjc-0002454	2.01399e-68	1.37317e-67	1.76938	RPF1	Similar to rpf1: Ribosome production factor 1	C2
Sjc-0005038	2.21356e-68	1.50582e-67	2.12878	EIF3C	Similar to EIF3C: Eukaryotic translation initiation factor 3 subunit C	C2
Sjc-0007442	5.13864e-68	3.45648e-67	1.98649	TAF3	Similar to zcrb1: Zinc finger CCHC-type and RNA-binding motif-containing protein 1	C2
Sjc-0000892	8.60303e-68	5.72263e-67	2.05543	SLMO2	putative cellular retinaldehyde-binding protein	C2
Sjc-0001560	9.29376e-68	6.16842e-67	2.67115	CHCHD2	Similar to CHCHD10: Coiled-coil-helix-coiled-coil-helix domain-containing protein 10%2C mitochondrial	C2
Sjc-0003525	9.41042e-68	6.23207e-67	1.8271	DDX52	Similar to DDX52: Probable ATP-dependent RNA helicase DDX52	C2
Sjc-0002975	1.08738e-67	7.18536e-67	2.47358	SJC_0002975	Similar to Dynein light chain LC6%2C flagellar outer arm	C2
Sjc-0006874	1.11595e-67	7.35789e-67	2.04467	RFC5	Similar to Rfc5: Replication factor C subunit 5	C2
Sjc-0001158	6.26263e-67	4.05813e-66	2.01912	SNRNP27	Similar to SNRNP27: U4/U6.U5 small nuclear ribonucleoprotein 27 kDa protein	C2
Sjc-0005793	1.13201e-66	7.27202e-66	2.07413	GET4	Similar to GET4: Golgi to ER traffic protein 4 homolog	C2
Sjc-0001218	1.15126e-66	7.36411e-66	2.02391	VAMP3	Similar to VAMP3: Vesicle-associated membrane protein 3	C2
Sjc-0002977	1.73734e-66	1.10659e-65	2.008	EIF2S1	Similar to eif2s1: Eukaryotic translation initiation factor 2 subunit 1	C2
Sjc-0002885	3.21324e-66	2.04231e-65	1.75255	CBWD1	Similar to Cbwd1: COBW domain-containing protein 1	C2
Sjc-0005690	3.35098e-66	2.12536e-65	1.8895	MAK16	Similar to MAK16: Protein MAK16 homolog	C2
Sjc-0004017	3.41589e-66	2.16195e-65	1.76429	RAE1	Similar to RAE1: mRNA export factor	C2
Sjc-0008472	4.42102e-66	2.78636e-65	1.79951	SJC_0008472	Zinc finger C2H2	C2
Sjc-0002329	5.10174e-66	3.20864e-65	2.12146	HINT2	Similar to HINT2: Histidine triad nucleotide-binding protein 2%2C mitochondrial	C2
Sjc-0003240	6.1732e-66	3.86631e-65	2.03776	TOP1	Similar to TOP1: DNA topoisomerase 1	C2
Sjc-0004426	6.97038e-66	4.35649e-65	2.05124	SRP9	Similar to Srp9: Signal recognition particle 9 kDa protein	C2
Sjc-0005426	1.55111e-65	9.59451e-65	2.3448	CCT5	Similar to CCT5: T-complex protein 1 subunit epsilon	C2
Sjc-0002966	2.54598e-65	1.56837e-64	2.20922	FNTA	Similar to FNTA: Protein farnesyltransferase/geranylgeranyltransferase type-1 subunit alpha	C2
Sjc-0006018	2.73321e-65	1.68025e-64	2.00661	MED20	Similar to TBC1D30: TBC1 domain family member 30	C2
Sjc-0003185	2.81389e-65	1.72632e-64	2.15107	TIMM23	Similar to timm23: Mitochondrial import inner membrane translocase subunit Tim23	C2
Sjc-0008927	8.51298e-65	5.16982e-64	2.37243	RPL7	Similar to rpl-7: 60S ribosomal protein L7	C2
Sjc-0001190	1.02563e-64	6.21594e-64	1.92967	WDR63	Similar to tomm20b: Mitochondrial import receptor subunit TOM20 homolog B	C2
Sjc-0002887	1.55309e-64	9.31857e-64	2.07521	SJC_0002887	SJCHGC02583 protein	C2
Sjc-0001059	3.51282e-64	2.07042e-63	1.78839	UBR7	Similar to UBR7: Putative E3 ubiquitin-protein ligase UBR7	C2
Sjc-0003170	4.22551e-64	2.48559e-63	2.37925	MAGOH	Similar to MAGOHB: Protein mago nashi homolog 2	C2
Sjc-0004425	5.49952e-64	3.20984e-63	2.01742	EZH1	Similar to E	C2
Sjc-0001526	6.71691e-64	3.90518e-63	1.87851	DDX18	Similar to DDX18: ATP-dependent RNA helicase DDX18	C2
Sjc-0004996	4.16039e-63	2.36386e-62	2.26614	MEAF6	Similar to meaf6: Chromatin modification-related protein MEAF6	C2
Sjc-0007260	7.02428e-63	3.96733e-62	2.04713	CUTA	Similar to Cuta: Protein CutA	C2
Sjc-0006574	9.24912e-63	5.19614e-62	1.82783	MRPS18C	Similar to MRPS18C: 28S ribosomal protein S18c%2C mitochondrial	C2
Sjc-0003453	1.40361e-62	7.8123e-62	1.87059	DCPS	Similar to m7GpppX diphosphatase	C2
Sjc-0008544	1.55209e-62	8.60677e-62	1.82857	PSMD10	Similar to ankrd52: Serine/threonine-protein phosphatase 6 regulatory ankyrin repeat subunit C	C2
Sjc-0005905	1.59056e-62	8.80383e-62	1.77569	SJC_0005905	SJCHGC04854 protein	C2
Sjc-0007732	4.04996e-62	2.20907e-61	1.75934	FAM173B	Similar to Fam173b: Protein N-lysine methyltransferase FAM173B	C2
Sjc-0002915	6.06552e-62	3.27866e-61	2.24144	EIF-3.F	Similar to eIF3-S5: Eukaryotic translation initiation factor 3 subunit F	C2
Sjc-0008615	6.22958e-62	3.36128e-61	2.05478	PDCL3	Similar to pdcl3: Phosducin-like protein 3	C2
Sjc-0005000	7.52256e-62	4.03715e-61	1.81589	LAP-2	Similar to lap-2: Putative aminopeptidase W07G4.4	C2
Sjc-0006572	3.34632e-61	1.76122e-60	1.98601	C11ORF73	Similar to hikeshi: Protein Hikeshi	C2
Sjc-0001748	4.37497e-61	2.29056e-60	2.02305	SDE2	Similar to SDE2: Replication stress response regulator SDE2	C2
Sjc-0003767	4.56827e-61	2.3876e-60	2.16256	CFL2	Similar to COF1: Cofilin	C2
Sjc-0008038	4.62247e-61	2.41173e-60	1.77208	SMYD4	Similar to SMYD4: SET and MYND domain-containing protein 4	C2
Sjc-0000450	5.91777e-61	3.07151e-60	1.8047	ARL5B	Similar to ARL5B: ADP-ribosylation factor-like protein 5B	C2
Sjc-0008905	6.65617e-61	3.44879e-60	1.89322	PSMD13	Similar to Psmd13: 26S proteasome non-ATPase regulatory subunit 13	C2
Sjc-0006079	8.96008e-61	4.6186e-60	2.10137	SJC_0006079	hypotheticial protein	C2
Sjc-0007645	9.75064e-61	5.00889e-60	2.26316	EIF4A3	Similar to EIF4A3: Eukaryotic initiation factor 4A-III	C2
Sjc-0004656	1.05127e-60	5.39115e-60	1.97819	ZNHIT3	Similar to ZNHIT3: Zinc finger HIT domain-containing protein 3	C2
Sjc-0004223	1.09415e-60	5.60144e-60	1.76842	RFC4	Similar to Rfc4: Replication factor C subunit 4	C2
Sjc-0009275	1.21275e-60	6.19804e-60	1.89811	EIF3I	Similar to Eif3i: Eukaryotic translation initiation factor 3 subunit I	C2
Sjc-0002553	1.68615e-60	8.60281e-60	1.93148	ARHGAP1	Similar to Arhgap1: Rho GTPase-activating protein 1	C2
Sjc-0002899	2.5366e-60	1.28327e-59	2.32558	SJC_0002899	hypothetical protein	C2
Sjc-0007322	2.64659e-60	1.33442e-59	1.88206	UTP14A	Similar to SPAC57A7.06: Uncharacterized protein C57A7.06	C2
Sjc-0003947	3.15193e-60	1.58388e-59	2.24107	PSMB2	Similar to Psmb2: Proteasome subunit beta type-2	C2
Sjc-0002960	3.1883e-60	1.59948e-59	1.8494	RABIF	Similar to RABIF: Guanine nucleotide exchange factor MSS4	C2
Sjc-0001518	1.18984e-59	5.90003e-59	1.74347	ISY1	Similar to ISY1: Pre-mRNA-splicing factor ISY1 homolog	C2
Sjc-0007638	1.82508e-59	9.00532e-59	2.18868	MBF1	Similar to EDF1: Endothelial differentiation-related factor 1	C2
Sjc-0003276	2.95129e-59	1.44671e-58	1.82369	MTERFD1	Similar to Mterf3: Transcription termination factor 3%2C mitochondrial	C2
Sjc-0001199	3.48549e-59	1.70579e-58	1.95864	PSMB1	Similar to psmb1-A: Proteasome subunit beta type-1-A	C2
Sjc-0007119	7.41971e-59	3.56717e-58	1.8421	PGD	Similar to Pgd: 6-phosphogluconate dehydrogenase%2C decarboxylating	C2
Sjc-0001467	1.2709e-58	6.08084e-58	2.03693	PSMB6	Similar to PSMB6: Proteasome subunit beta type-6	C2
Sjc-0006182	2.03925e-58	9.69534e-58	1.77087	COQ2	Similar to Coq2: 4-hydroxybenzoate polyprenyltransferase%2C mitochondrial	C2
Sjc-0003001	2.47482e-58	1.17476e-57	1.94902	PPIE	Similar to Peptidyl-prolyl cis-trans isomerase E	C2
Sjc-0009710	4.78197e-58	2.25564e-57	1.90265	PTRH2	Similar to PTRH2: Peptidyl-tRNA hydrolase 2%2C mitochondrial	C2
Sjc-0004749	8.06995e-58	3.77689e-57	2.25954	RPS18	Similar to RPS18: 40S ribosomal protein S18	C2
Sjc-0006862	8.15924e-58	3.81273e-57	2.21807	DTYMK	Similar to dtymk: Thymidylate kinase	C2
Sjc-0007128	2.47935e-57	1.14081e-56	1.89335	CDC42	Similar to cdc-42: Cell division control protein 42 homolog	C2
Sjc-0003936	2.82007e-57	1.29164e-56	2.17347	UBE2IA	Similar to ube2ia: SUMO-conjugating enzyme UBC9-A	C2
Sjc-0008844	5.37186e-57	2.44546e-56	1.99078	SJC_0008844	ribonuclease Z	C2
Sjc-0004134	1.02485e-56	4.64433e-56	2.38652	STIP1	Similar to STIP1: Stress-induced-phosphoprotein 1	C2
Sjc-0002847	1.09306e-56	4.94596e-56	1.7773	STRAP	Similar to Strap: Serine-threonine kinase receptor-associated protein	C2
Sjc-0007669	3.34278e-56	1.49901e-55	1.98363	PSMD8	Similar to Psmd8: 26S proteasome non-ATPase regulatory subunit 8	C2
Sjc-0005771	5.50724e-56	2.45129e-55	1.8834	SJC_0005771	Chromatin accessibility complex protein 1	C2
Sjc-0003584	3.25752e-55	1.41222e-54	1.8992	ZNF207	Similar to ZNF207: BUB3-interacting and GLEBS motif-containing protein ZNF207	C2
Sjc-0005116	3.25745e-55	1.41222e-54	1.72792	MARCH5	Similar to march5: E3 ubiquitin-protein ligase MARCH5	C2
Sjc-0008858	3.33584e-55	1.44408e-54	2.17106	CISD2	Similar to Cisd2: CDGSH iron-sulfur domain-containing protein 2 homolog	C2
Sjc-0004927	6.14425e-55	2.6522e-54	2.20698	PFDN6	Similar to PFDN6: Prefoldin subunit 6	C2
Sjc-0000345	1.5482e-54	6.61624e-54	1.75463	CDK10	Similar to Cdk10: Cyclin-dependent kinase 10	C2
Sjc-0002609	1.04774e-53	4.39612e-53	1.83722	AHCY	Similar to Ahcy: Adenosylhomocysteinase	C2
Sjc-0004937	6.5508e-53	2.68109e-52	1.94441	NDUFA6	Similar to NDUFA6: NADH dehydrogenase [ubiquinone] 1 alpha subcomplex subunit 6	C2
Sjc-0002003	8.97615e-53	3.65876e-52	2.03458	SJC_0002003	hypothetical protein	C2
Sjc-0008991	1.15536e-52	4.6839e-52	2.02752	PSMB4	Similar to psmb4: Proteasome subunit beta type-4	C2
Sjc-0002242	4.13482e-52	1.6408e-51	1.87781	SCM-1	Similar to SCM-1: Ferritin-1 heavy chain	C2
Sjc-0003089	6.13058e-52	2.41362e-51	1.75964	SJC_0003089	RRP15 protein	C2
Sjc-0003047	8.85513e-52	3.46807e-51	1.80017	SJC_0003047	SJCHGC05078 protein	C2
Sjc-0006285	1.80925e-51	6.98554e-51	1.74578	DUSP23	Similar to DUSP23: Dual specificity protein phosphatase 23	C2
Sjc-0004078	4.46586e-51	1.71325e-50	2.0267	PFDN4	Similar to VIP3: Probable prefoldin subunit 4	C2
Sjc-0008805	9.11698e-51	3.46653e-50	1.78607	SJC_0008805	Protein of unknown function	C2
Sjc-0007935	2.24044e-50	8.41215e-50	2.03778	MRPL52	Similar to mRpL52: 39S ribosomal protein L52%2C mitochondrial	C2
Sjc-0004852	4.72671e-50	1.75497e-49	1.76394	EIF3J	Similar to EIF3J: Eukaryotic translation initiation factor 3 subunit J	C2
Sjc-0000960	6.28499e-49	2.2635e-48	1.93509	LSM2	Similar to LSM2: U6 snRNA-associated Sm-like protein LSm2	C2
Sjc-0005957	1.06972e-48	3.825e-48	1.8499	CCT7	Similar to CCT7: T-complex protein 1 subunit eta	C2
Sjc-0008697	1.47649e-48	5.21729e-48	1.78343	ANKRD49	Similar to ANKRD49: Ankyrin repeat domain-containing protein 49	C2
Sjc-0001072	2.47983e-48	8.70115e-48	1.75811	SJC_0001072	SJCHGC05942 protein	C2
Sjc-0003792	1.2796e-47	4.3772e-47	1.74091	COX5B	Similar to COX5B: Cytochrome c oxidase subunit 5B%2C mitochondrial	C2
Sjc-0008031	1.83432e-47	6.22505e-47	1.90788	TCEB1	Similar to ELOC: Elongin-C	C2
Sjc-0005828	8.4751e-47	2.81253e-46	1.78646	HPRT1	Similar to HGPRT: Hypoxanthine-guanine phosphoribosyltransferase	C2
Sjc-0001036	3.16599e-46	1.02903e-45	1.77401	UBE2G1	Similar to UBE2G1: Ubiquitin-conjugating enzyme E2 G1	C2
Sjc-0006245	3.62621e-46	1.17607e-45	1.80606	AK6	Similar to AK6: Adenylate kinase isoenzyme 6	C2
Sjc-0006899	5.89034e-45	1.83881e-44	1.88976	CCT-1	Similar to TCP-1A: T-complex protein 1 subunit alpha	C2
Sjc-0001151	1.27282e-44	3.93656e-44	1.8771	NDUFB7	Similar to NDUFB7: NADH dehydrogenase [ubiquinone] 1 beta subcomplex subunit 7	C2
Sjc-0003549	1.66972e-44	5.15347e-44	1.84402	TRA2B	Similar to TRA2B: Transformer-2 protein homolog beta	C2
Sjc-0001299	2.49419e-42	7.14669e-42	1.78092	PSMC2	Similar to PSMC2: 26S proteasome regulatory subunit 7	C2
Sjc-0008258	5.39853e-39	1.40222e-38	1.7294	NDUFB8	NADH dehydrogenase 1 beta subcomplex 8	C2
Sjc-0003476	2.60825e-37	6.42426e-37	1.75988	SJC_0003476	putative mitochondrial electron transport nadh to ubiquinone	C2
Sjc-0009292	2.4718e-33	5.47263e-33	1.73414	SJC_0009292	Mitochondrial ATP synthase coupling factor 6	C2
Sjc-0004815	1.30657e-195	1.95986e-192	4.83645	RPLP2	Similar to 60S acidic ribosomal protein P2	C3
Sjc-0003422	7.32958e-166	2.19887e-163	4.14803	SJC_0003422	RNA-binding region RNP-1 ,domain-containing protein	C3
Sjc-0009219	1.38078e-159	3.18643e-157	4.00288	RPL30	Similar to RPL30: 60S ribosomal protein L30	C3
Sjc-0003855	5.3213e-152	1.14028e-149	4.41954	SET	Similar to Set: Protein SET	C3
Sjc-0003500	3.07331e-145	5.76246e-143	3.45222	LAS1L	Similar to RPL38: 60S ribosomal protein L38	C3
Sjc-0004532	8.33064e-144	1.38844e-141	4.2001	PTGES3	Similar to daf-41: Co-chaperone protein daf-41	C3
Sjc-0002600	7.45082e-135	8.94098e-133	3.66484	RPL18A	Similar to RPL18A: 60S ribosomal protein L18a	C3
Sjc-0008099	7.99891e-135	9.22952e-133	3.55817	RPL36A	Similar to RPL44: 60S ribosomal protein L44	C3
Sjc-0002775	1.67201e-131	1.56431e-129	3.37344	GAR1	Similar to gar1: H/ACA ribonucleoprotein complex subunit 1	C3
Sjc-0007715	3.30998e-128	2.42194e-126	3.80137	SRSF2	Similar to rsp-4: Probable splicing factor%2C arginine/serine-rich 4	C3
Sjc-0004688	7.68868e-128	5.49192e-126	3.42531	RPS15A	Similar to RPS15A: 40S ribosomal protein S15a	C3
Sjc-0005741	4.40595e-127	3.07392e-125	3.68251	RPL22	Similar to RPL22: 60S ribosomal protein L22	C3
Sjc-0004713	3.29293e-125	2.10187e-123	3.38983	RPL27A	Similar to rpl27a: 60S ribosomal protein L27a	C3
Sjc-0006529	9.26797e-125	5.34691e-123	3.71087	RPS17	Similar to RPS17: 40S ribosomal protein S17	C3
Sjc-0008911	6.37952e-124	3.47974e-122	3.57729	RPS28	Similar to rps28: 40S ribosomal protein S28	C3
Sjc-0009429	6.35431e-124	3.47974e-122	3.55774	RPL14	Similar to RPL14: 60S ribosomal protein L14	C3
Sjc-0002944	1.10359e-117	4.79822e-116	3.35746	RPS9	Similar to RpS9: 40S ribosomal protein S9	C3
Sjc-0006279	7.46907e-115	3.028e-113	3.45576	HNRNPA2B1	Similar to HNRNP: Heterogeneous nuclear ribonucleoprotein A1%2C A2/B1 homolog	C3
Sjc-0008032	1.28708e-112	4.88764e-111	3.23898	SJC_0008032	Plasminogen activator inhibitor 1 RNA-binding protein	C3
Sjc-0003314	4.83114e-112	1.72541e-110	3.09297	COX5B	SJCHGC06267 protein	C3
Sjc-0003863	5.61029e-112	1.9801e-110	3.12477	RPL35A	Similar to RPL35A: 60S ribosomal protein L35a	C3
Sjc-0001071	7.57832e-112	2.58352e-110	3.32136	RPL15	Similar to rpl15: 60S ribosomal protein L15	C3
Sjc-0002545	3.45377e-111	1.13861e-109	3.29277	SJC_0002545	hypotheticial protein	C3
Sjc-0007619	1.07334e-110	3.50002e-109	3.36328	SNRPD3	Similar to SmD3: Small nuclear ribonucleoprotein Sm D3	C3
Sjc-0004910	1.56926e-110	5.06213e-109	3.33188	RPL27	Similar to rpl27: 60S ribosomal protein L27	C3
Sjc-0001480	3.90599e-110	1.23347e-108	2.8281	MACROD1	Similar to MACROD2: ADP-ribose glycohydrolase MACROD2	C3
Sjc-0004290	7.70903e-108	2.26736e-106	3.05037	SJC_0004290	translation initiation factor 4G	C3
Sjc-0005018	3.15229e-106	9.00653e-105	2.73963	EWSR1	Similar to Ewsr1: RNA-binding protein EWS	C3
Sjc-0000911	1.02674e-105	2.90586e-104	2.78723	SJC_0000911	hypothetical protein	C3
Sjc-0001346	1.0984e-104	3.01896e-103	3.27306	SRSF1	Similar to srsf1b: Serine/arginine-rich splicing factor 1B	C3
Sjc-0008678	1.35353e-104	3.6582e-103	3.45858	CYP-1	Similar to CYP-1: Peptidyl-prolyl cis-trans isomerase	C3
Sjc-0005564	1.46722e-104	3.93007e-103	3.40941	SJC_0005564	Similar to ATP synthase lipid-binding protein%2C mitochondrial	C3
Sjc-0000883	1.22238e-103	3.18882e-102	3.62011	DLC-1	Similar to DYNLL2: Dynein light chain 2%2C cytoplasmic	C3
Sjc-0000157	2.64017e-103	6.82803e-102	2.91643	RPS25	Similar to RpS25: 40S ribosomal protein S25	C3
Sjc-0006439	5.00931e-103	1.27355e-101	3.13287	RPL4	Similar to RPL4: 60S ribosomal protein L4	C3
Sjc-0005632	3.08484e-101	7.34487e-100	2.93496	PA2G4	Similar to Pa2g4: Proliferation-associated protein 2G4	C3
Sjc-0002817	1.0279e-100	2.37207e-99	2.6806	DKC1	Similar to DKC1: H/ACA ribonucleoprotein complex subunit DKC1	C3
Sjc-0001120	2.78241e-98	5.92002e-97	2.90782	SRSF4	Similar to SRSF4: Serine/arginine-rich splicing factor 4	C3
Sjc-0007523	6.443e-98	1.34229e-96	2.95457	RPS11	Similar to RPS11: 40S ribosomal protein S11	C3
Sjc-0006064	2.21725e-97	4.58741e-96	3.2053	ST13	Similar to ST13: Hsc70-interacting protein	C3
Sjc-0001270	2.95479e-97	6.06479e-96	2.69964	SJC_0001270	SJCHGC08062 protein	C3
Sjc-0004863	2.72481e-96	5.34276e-95	2.91202	SJC_0004863	expressed conserved protein	C3
Sjc-0007360	2.45827e-95	4.6676e-94	3.3138	EIF5A2	Similar to EIF5A: Eukaryotic translation initiation factor 5A-1	C3
Sjc-0002681	3.52712e-95	6.57227e-94	2.67466	U2AF1	Similar to U2af38: Splicing factor U2af 38 kDa subunit	C3
Sjc-0007507	5.05806e-95	9.30931e-94	2.49791	EIF5B	Similar to Eif5b: Eukaryotic translation initiation factor 5B	C3
Sjc-0009146	5.54825e-95	1.00877e-93	3.43615	HSPE1	Similar to SJCHGC01960: 10 kDa heat shock protein%2C mitochondrial	C3
Sjc-0008088	1.53922e-94	2.76506e-93	2.8239	RPL17	Similar to RpL17: 60S ribosomal protein L17	C3
Sjc-0008935	4.64681e-94	8.1523e-93	2.85164	CSTB	Similar to CSTB: Cystatin-B	C3
Sjc-0002694	1.53341e-93	2.64381e-92	2.90881	RPS26	Similar to rps-26: 40S ribosomal protein S26	C3
Sjc-0006119	4.23402e-92	6.94102e-91	2.88038	RPS13	Similar to RPS13: 40S ribosomal protein S13	C3
Sjc-0008077	4.82535e-92	7.86742e-91	2.59567	CSNK2B	Similar to CSNK2B: Casein kinase II subunit beta	C3
Sjc-0003723	7.81921e-92	1.26798e-90	2.55146	SRSF7	Similar to SRSF7: Serine/arginine-rich splicing factor 7	C3
Sjc-0008207	1.53036e-91	2.45512e-90	3.25343	H2AFV	Similar to H2AFV: Histone H2A.V	C3
Sjc-0007699	1.98182e-91	3.16248e-90	2.33284	MTRF1	Similar to prfA: Peptide chain release factor 1	C3
Sjc-0004455	3.89321e-89	5.72531e-88	3.16567	SNRNP200	Similar to SNRNP200: U5 small nuclear ribonucleoprotein 200 kDa helicase	C3
Sjc-0003426	1.99716e-88	2.83957e-87	2.93024	RDX	Similar to EZR: Ezrin	C3
Sjc-0009475	4.22422e-88	5.83993e-87	3.0812	TXN	Similar to txn: Thioredoxin	C3
Sjc-0008449	8.06708e-88	1.10006e-86	2.52965	SRRT	Similar to Ars2: Serrate RNA effector molecule homolog	C3
Sjc-0001711	1.79816e-87	2.40825e-86	2.66579	SAR1B	Similar to SAR1B: GTP-binding protein SAR1b	C3
Sjc-0005289	2.69282e-87	3.59042e-86	2.99455	SJC_0005289	hypothetical protein	C3
Sjc-0006382	7.512e-86	9.50887e-85	2.97291	MES-4	Similar to Nsd2: Histone-lysine N-methyltransferase NSD2	C3
Sjc-0005509	8.53417e-85	1.045e-83	2.77542	SNRPC	Similar to SNRPC: U1 small nuclear ribonucleoprotein C	C3
Sjc-0002110	1.54501e-84	1.87653e-83	2.70206	RPL23A	Similar to RPL23A: 60S ribosomal protein L23a	C3
Sjc-0008973	1.6149e-84	1.95351e-83	2.59661	P4HB	Similar to pdi-2: Protein disulfide-isomerase 2	C3
Sjc-0006161	1.01326e-83	1.19207e-82	2.02536	MTHFS	Similar to MTHFS: 5-formyltetrahydrofolate cyclo-ligase	C3
Sjc-0001692	1.33995e-83	1.56415e-82	2.46803	PPP1R10	Similar to PPP1R10: Serine/threonine-protein phosphatase 1 regulatory subunit 10	C3
Sjc-0008070	1.57992e-83	1.83002e-82	2.8212	SJC_0008070	SJCHGC09795 protein	C3
Sjc-0005661	4.8415e-83	5.50171e-82	2.79332	RPS6	Similar to RPS6: 40S ribosomal protein S6	C3
Sjc-0001750	7.0213e-83	7.91876e-82	3.05292	RAN	Similar to Bm1_44725: GTP-binding nuclear protein Ran	C3
Sjc-0002397	9.05403e-83	1.01351e-81	2.71791	ECSIT	Similar to ECSIT: Evolutionarily conserved signaling intermediate in Toll pathway%2C mitochondrial	C3
Sjc-0005880	1.91611e-82	2.12901e-81	2.51097	SJC_0005880	SJCHGC09812 protein	C3
Sjc-0007433	7.25525e-82	7.85767e-81	2.2631	RBM25	Similar to Rbm25: RNA-binding protein 25	C3
Sjc-0005212	1.41376e-81	1.52017e-80	2.71922	SNRNP-U1-70K	Similar to snRNP-U1-70K: U1 small nuclear ribonucleoprotein 70 kDa	C3
Sjc-0003200	1.02687e-80	1.08092e-79	2.26686	UPF3B	Similar to UPF3A: Regulator of nonsense transcripts 3A	C3
Sjc-0007194	9.18184e-80	9.46582e-79	2.11441	ETF1	Similar to ERF1: Eukaryotic peptide chain release factor subunit 1	C3
Sjc-0003356	9.68714e-80	9.95254e-79	2.48268	KHDRBS3	Similar to KHDRBS3: KH domain-containing%2C RNA-binding%2C signal transduction-associated protein 3	C3
Sjc-0009486	1.99531e-79	2.01546e-78	2.61095	RPS21	Similar to RPS21: 40S ribosomal protein S21	C3
Sjc-0007574	2.22287e-79	2.23779e-78	2.23178	TXN2	Similar to TXN2: Thioredoxin%2C mitochondrial	C3
Sjc-0005699	3.49253e-79	3.50421e-78	2.64656	ALDH1A1	Similar to ALDH1A1: Retinal dehydrogenase 1	C3
Sjc-0000677	1.3152e-78	1.27689e-77	2.2547	SJC_0000677	Upstream activation factor subunit UAF30	C3
Sjc-0001828	8.01729e-78	7.53978e-77	2.26994	RSF1	Similar to SRSF7: Serine/arginine-rich splicing factor 7	C3
Sjc-0003190	2.31193e-77	2.12755e-76	2.37072	GCVH	Similar to gcvH: Glycine cleavage system H protein	C3
Sjc-0006373	5.78677e-76	5.12033e-75	2.18503	PPHLN1	Similar to Pphln1: Periphilin-1	C3
Sjc-0006141	2.65222e-75	2.27985e-74	2.44817	PPIG	Similar to Ppig: Peptidyl-prolyl cis-trans isomerase G	C3
Sjc-0005738	3.12921e-75	2.68218e-74	2.08383	PUS1	Similar to PUS1: tRNA pseudouridine synthase A	C3
Sjc-0001479	5.06123e-75	4.2771e-74	2.39615	PRPF8	Similar to PRPF8: Pre-mRNA-processing-splicing factor 8	C3
Sjc-0003281	1.05009e-74	8.79967e-74	2.41694	COX4I1	Similar to BOLA3: BolA-like protein 3	C3
Sjc-0007086	4.339e-74	3.55656e-73	2.15448	SJC_0007086	SJCHGC02674 protein	C3
Sjc-0000876	5.63076e-74	4.57786e-73	2.38759	SUB1	Similar to SUB1: Activated RNA polymerase II transcriptional coactivator p15	C3
Sjc-0005773	2.57832e-73	2.06817e-72	2.24448	RNF115	Similar to Rnf181: E3 ubiquitin-protein ligase RNF181	C3
Sjc-0004198	2.98627e-73	2.38901e-72	1.96888	SJC_0004198	SJCHGC05781 protein	C3
Sjc-0000676	1.21832e-72	9.51815e-72	2.04028	TMEM42	SJCHGC02840 protein	C3
Sjc-0001060	2.09081e-72	1.62498e-71	2.41706	CCT6A	Similar to Cct6a: T-complex protein 1 subunit zeta	C3
Sjc-0000705	1.34728e-71	1.01554e-70	1.97915	MCM2	Similar to MCM2: DNA replication licensing factor MCM2	C3
Sjc-0004159	1.64165e-71	1.23124e-70	2.59515	ENO	Similar to ENO: Enolase	C3
Sjc-0001285	5.00816e-71	3.73743e-70	2.2041	RPS12	Similar to RPS12: 40S ribosomal protein S12	C3
Sjc-0001577	4.04503e-70	2.95978e-69	2.51982	RPL12	Similar to Rpl12: 60S ribosomal protein L12	C3
Sjc-0002484	4.66033e-70	3.39344e-69	2.2341	ENY2	Similar to eny2-2: Transcription and mRNA export factor ENY2-2	C3
Sjc-0002364	8.27701e-70	5.95468e-69	2.18598	EIF3E	Similar to EIF3E: Eukaryotic translation initiation factor 3 subunit E	C3
Sjc-0005240	9.77706e-70	7.00028e-69	2.16935	CBX3	Similar to CBX3: Chromobox protein homolog 3	C3
Sjc-0004820	2.5607e-69	1.81181e-68	2.04798	PPIL1	Similar to Ppil1: Peptidyl-prolyl cis-trans isomerase-like 1	C3
Sjc-0009090	7.96946e-69	5.54719e-68	2.131	SJC_0009090	Zinc finger, C2H2-type domain-containing protein	C3
Sjc-0000643	1.65954e-68	1.13408e-67	1.91654	QARS	Similar to Qars: Glutamine--tRNA ligase	C3
Sjc-0006488	3.51653e-68	2.3814e-67	2.07345	SJC_0006488	Protein of unknown function	C3
Sjc-0006936	6.76361e-68	4.50907e-67	2.13818	SPCS1	Microsomal signal peptidase 12 kDa subunit,domain-containing protein	C3
Sjc-0000079	2.53368e-67	1.66325e-66	1.99895	PHB	Similar to l	C3
Sjc-0002571	2.62407e-67	1.71883e-66	2.02303	CHAF1A	Similar to chaf1a-a: Chromatin assembly factor 1 subunit A-A	C3
Sjc-0002904	3.6346e-67	2.37555e-66	2.13528	EFTUD2	Similar to EFTUD2: 116 kDa U5 small nuclear ribonucleoprotein component	C3
Sjc-0007246	3.80774e-67	2.48331e-66	1.98353	KIN	Similar to Kin: DNA/RNA-binding protein KIN17	C3
Sjc-0005157	6.26304e-67	4.05813e-66	2.194	HSPA9	Similar to HSPA9: Stress-70 protein%2C mitochondrial	C3
Sjc-0002884	1.1457e-66	7.3442e-66	2.1371	PTBP2	Similar to PTBP1: Polypyrimidine tract-binding protein 1	C3
Sjc-0002815	1.4063e-65	8.71673e-65	1.98273	LIN-53	Similar to Caf1: Probable histone-binding protein Caf1	C3
Sjc-0001099	4.43961e-65	2.70708e-64	1.9988	LUC7L3	Similar to LUC7L3: Luc7-like protein 3	C3
Sjc-0006379	6.91924e-65	4.21049e-64	1.92848	SBDS	Similar to sbds: Ribosome maturation protein SBDS	C3
Sjc-0004220	1.49786e-64	9.00519e-64	1.9588	CHD7	Similar to CHD7: Chromodomain-helicase-DNA-binding protein 7	C3
Sjc-0006312	1.67392e-64	9.98361e-64	2.0536	SARS	Similar to sars-1: Probable serine--tRNA ligase%2C cytoplasmic	C3
Sjc-0001198	2.68783e-64	1.59043e-63	1.86112	SJC_0001198	Negative elongation factor E	C3
Sjc-0001189	9.86388e-64	5.70167e-63	2.13827	SJC_0001189	Protein of unknown function	C3
Sjc-0003205	1.00103e-63	5.77519e-63	1.89676	PITRM1	Similar to pitrm1: Presequence protease%2C mitochondrial	C3
Sjc-0002578	1.81763e-63	1.04261e-62	2.2403	PSMB5	Similar to Psmb5: Proteasome subunit beta type-5	C3
Sjc-0002529	2.43678e-63	1.3898e-62	1.84775	LSM14A	Similar to lsm14b-b: Protein LSM14 homolog B-B	C3
Sjc-0002835	1.11022e-62	6.20236e-62	2.0777	UBE2V2	Similar to UBE2V1: Ubiquitin-conjugating enzyme E2 variant 1	C3
Sjc-0004943	2.2744e-62	1.25426e-61	1.86046	SJC_0004943	peptidase, putative	C3
Sjc-0003604	3.25096e-62	1.78624e-61	1.8771	NURF-38	Similar to Nurf-38: Inorganic pyrophosphatase	C3
Sjc-0000998	3.90178e-62	2.13601e-61	2.37873	SJC_0000998	SERF-like protein	C3
Sjc-0003216	6.49122e-62	3.49617e-61	1.93872	POLE	Similar to Pole: DNA polymerase epsilon catalytic subunit A	C3
Sjc-0003296	6.90147e-62	3.71047e-61	1.90679	IMPA2	Similar to IMP2: Inositol monophosphatase 2	C3
Sjc-0003647	1.0825e-61	5.76822e-61	2.0584	PHB2	Similar to phb2: Prohibitin-2	C3
Sjc-0007333	1.99674e-61	1.06022e-60	1.97889	C14ORF166	cle7, putative	C3
Sjc-0006672	2.38334e-61	1.26326e-60	1.92284	KPNB1	Similar to KPNB1: Importin subunit beta-1	C3
Sjc-0004271	2.43223e-61	1.2869e-60	2.24047	ATG3	Similar to atg3: Ubiquitin-like-conjugating enzyme ATG3	C3
Sjc-0007126	2.65085e-61	1.4001e-60	1.91584	CUL4B	Similar to CUL4B: Cullin-4B	C3
Sjc-0000826	6.90935e-61	3.5738e-60	2.14241	ELAC1	Similar to rnz: Ribonuclease Z	C3
Sjc-0005881	2.23175e-60	1.13287e-59	2.03728	GRPEL1	Similar to GRPEL1: GrpE protein homolog 1%2C mitochondrial	C3
Sjc-0000980	2.30661e-60	1.16889e-59	2.0825	RBR-2	Similar to KDM5D: Lysine-specific demethylase 5D	C3
Sjc-0003468	2.67786e-60	1.34792e-59	1.91348	PRPF38A	Similar to prpf38a: Pre-mRNA-splicing factor 38A	C3
Sjc-0003103	2.79518e-59	1.37468e-58	1.9804	CARHSP1	Similar to CG9705: Cold shock domain-containing protein CG9705	C3
Sjc-0003348	3.94616e-59	1.92809e-58	1.96818	U2AF2	Similar to U2af2: Splicing factor U2AF 65 kDa subunit	C3
Sjc-0007921	4.74712e-59	2.30816e-58	1.82821	TRA2B	Similar to TRA2A: Transformer-2 protein homolog alpha	C3
Sjc-0006511	4.77707e-59	2.31896e-58	2.14662	SJC_0006511	F type H transporting ATPase subunit e	C3
Sjc-0006281	5.84239e-59	2.82696e-58	2.49591	SJC_0006281	Similar to Universal stress protein in QAH/OAS sulfhydrylase 3'region	C3
Sjc-0001720	6.17644e-59	2.97899e-58	2.00902	SREK1	Similar to SRSF11: Serine/arginine-rich splicing factor 11	C3
Sjc-0006883	6.72313e-59	3.23746e-58	1.89524	TMED2	Similar to sel-9: Suppressor/enhancer of lin-12 protein 9	C3
Sjc-0007690	1.8034e-58	8.61498e-58	1.84131	CDC6	Similar to Cdc6: Cell division control protein 6 homolog	C3
Sjc-0002598	7.20943e-58	3.37942e-57	2.03653	CCDC25	Similar to ccdc25: Coiled-coil domain-containing protein 25	C3
Sjc-0006246	1.32992e-57	6.18569e-57	1.8009	RBM15B	Similar to nito: RNA-binding protein spenito	C3
Sjc-0001652	2.25995e-57	1.04145e-56	1.944	DDX17	Similar to DDX17: Probable ATP-dependent RNA helicase DDX17	C3
Sjc-0003120	2.76168e-57	1.26683e-56	1.83296	C19ORF52	Similar to TIMM29: Mitochondrial import inner membrane translocase subunit Tim29	C3
Sjc-0006212	5.2911e-56	2.3621e-55	2.18899	PSMC5	Similar to PSMC5: 26S proteasome regulatory subunit 8	C3
Sjc-0002895	5.47744e-56	2.44165e-55	1.9526	LENG1	Similar to LENG1: Leukocyte receptor cluster member 1	C3
Sjc-0001710	7.36339e-56	3.25814e-55	2.18701	DNAJA4	Similar to DNAJA1: DnaJ homolog subfamily A member 1	C3
Sjc-0004625	5.44132e-54	2.30239e-53	1.84792	SUZ12	Similar to Su	C3
Sjc-0004105	8.33964e-54	3.51884e-53	1.78	EIF3B	Similar to EIF3B: Eukaryotic translation initiation factor 3 subunit B	C3
Sjc-0009038	2.48123e-53	1.02956e-52	1.86715	YFEX	Similar to yfeX: Dye-decolorizing peroxidase YfeX	C3
Sjc-0002412	6.72872e-53	2.75016e-52	1.79078	SJC_0002412	NADH dehydrogenase 1 beta subcomplex subunit 6	C3
Sjc-0009349	1.24797e-52	5.04572e-52	1.84929	ROMO1	Similar to romo1: Reactive oxygen species modulator 1	C3
Sjc-0002845	1.47939e-52	5.96529e-52	2.22546	ATP5D	Similar to ATP5F1D: ATP synthase subunit delta%2C mitochondrial	C3
Sjc-0007173	2.72504e-52	1.09002e-51	1.92043	SLC30A6	Similar to SLC30A6: Zinc transporter 6	C3
Sjc-0002330	5.45318e-52	2.15541e-51	1.8244	NOP56	Similar to NOP56: Nucleolar protein 56	C3
Sjc-0007087	7.05685e-52	2.77102e-51	2.00451	DYNC1H1	Similar to DYNC1H1: Cytoplasmic dynein 1 heavy chain 1	C3
Sjc-0001062	1.62141e-51	6.27642e-51	1.76263	ATG4C	Similar to MRPL20: 39S ribosomal protein L20%2C mitochondrial	C3
Sjc-0008721	5.0786e-51	1.94334e-50	1.88357	SUPT16H	Similar to Supt16h: FACT complex subunit SPT16	C3
Sjc-0004738	7.4838e-51	2.84916e-50	1.75957	MCM6	Similar to zmcm6-b: Zygotic DNA replication licensing factor mcm6-B	C3
Sjc-0003224	3.57518e-49	1.30164e-48	2.1088	KPNA2	Similar to KPNA2: Importin subunit alpha-1	C3
Sjc-0003515	1.15989e-48	4.12773e-48	2.13479	VCP	Similar to VCP: Transitional endoplasmic reticulum ATPase	C3
Sjc-0002322	2.18059e-48	7.66016e-48	1.89461	SJC_0002322	SJCHGC03988 protein	C3
Sjc-0000938	2.69664e-48	9.45085e-48	2.0918	SJC_0000938	Similar to 14-3-3 protein homolog 1	C3
Sjc-0002580	3.01624e-48	1.05586e-47	2.2163	SLC25A31	Similar to AAC3: ADP%2CATP carrier protein 3%2C mitochondrial	C3
Sjc-0001409	3.66457e-48	1.27685e-47	1.79469	MTOR	Similar to Tpr: Nucleoprotein TPR	C3
Sjc-0005299	1.30485e-47	4.4534e-47	1.76714	ATP6V0C	Similar to Atp6v0c: V-type proton ATPase 16 kDa proteolipid subunit	C3
Sjc-0002360	1.01806e-46	3.36362e-46	1.9326	GMNN	geminin-like	C3
Sjc-0001436	1.81211e-45	5.74665e-45	1.75514	NHP2	Similar to Nhp2: H/ACA ribonucleoprotein complex subunit 2	C3
Sjc-0008490	3.83392e-45	1.20563e-44	1.99916	POMP	Similar to Pomp: Proteasome maturation protein	C3
Sjc-0007583	2.58328e-43	7.67311e-43	1.86559	LIN52	Similar to lin52: Protein lin-52 homolog	C3
Sjc-0003280	1.76448e-42	5.08984e-42	1.76386	NDUFS6	Similar to nduf-6: Probable NADH dehydrogenase [ubiquinone] iron-sulfur protein 6%2C mitochondrial	C3
Sjc-0004931	3.85108e-42	1.09406e-41	1.84573	VDAC2	Similar to VDAC2: Voltage-dependent anion-selective channel protein 2	C3
Sjc-0002499	2.23097e-39	5.87097e-39	1.89572	SOD	Similar to SOD: Superoxide dismutase [Cu-Zn]	C3
Sjc-0000224	1.60831e-32	3.47116e-32	1.98126	DAF-21	Similar to daf-21: Heat shock protein 90	C3
Sjc-0006118	6.45098e-90	9.92459e-89	2.16198	DHFR	Similar to DHFR: Dihydrofolate reductase	C4
Sjc-0003673	5.77003e-89	8.44395e-88	2.46242	GPD1	Similar to Gpd1: Glycerol-3-phosphate dehydrogenase [NAD	C4
Sjc-0000679	8.43974e-72	6.40993e-71	2.13627	LMO4	Similar to lmo4.2: LIM domain transcription factor LMO4.2	C4
Sjc-0002388	9.05529e-71	6.70762e-70	2.06834	SOD2	Similar to Sod2: Superoxide dismutase [Mn]%2C mitochondrial	C4
Sjc-0005129	2.67834e-69	1.88616e-68	1.98374	RSL1D1	Ribosomal L1 domain-containing protein 1	C4
Sjc-0002589	6.29741e-69	4.39354e-68	1.96667	MTAP	Similar to mtap: S-methyl-5'-thioadenosine phosphorylase	C4
Sjc-0006074	4.43931e-64	2.60116e-63	1.94746	TIMM17B	Similar to Timm17a: Mitochondrial import inner membrane translocase subunit Tim17-A	C4
Sjc-0007988	2.98022e-63	1.69652e-62	1.75759	BAK1	Similar to BAK1: Bcl-2 homologous antagonist/killer	C4
Sjc-0009281	3.32344e-60	1.66172e-59	1.81068	SJC_0009281	SJCHGC02341 protein	C4
Sjc-0008391	1.59568e-59	7.88641e-59	1.88828	SJC_0008391	Mitochondrial import inner membrane translocase subunit tim9	C4
Sjc-0004480	4.59154e-58	2.16923e-57	2.13222	SJC_0004480	hypothetical protein	C4
Sjc-0000658	1.05182e-57	4.90741e-57	1.79883	PUS3	Similar to PUS3: tRNA pseudouridine	C4
Sjc-0001240	3.9942e-57	1.82107e-56	1.95897	TTC1	Similar to TTC1: Tetratricopeptide repeat protein 1	C4
Sjc-0001271	6.55879e-56	2.91071e-55	1.76335	KIAA0226	Zinc finger FLYWCH type	C4
Sjc-0001478	3.17972e-55	1.38449e-54	1.79774	KLF15	Similar to KLF15: Krueppel-like factor 15	C4
Sjc-0008341	1.2002e-52	4.85913e-52	1.85457	SJC_0008341	Eukaryotic translation initiation factor 4H	C4
Sjc-0002992	4.17914e-46	1.35102e-45	1.79218	ADRM1	Similar to adrm1-a: Proteasomal ubiquitin receptor ADRM1-A	C4
Sjc-0008741	6.4895e-46	2.08666e-45	1.82602	ATP5O	Similar to ATPsynO: ATP synthase subunit O%2C mitochondrial	C4
Sjc-0001017	7.7106e-46	2.47399e-45	1.77982	UBE2S	Similar to ube2s-b: Ubiquitin-conjugating enzyme E2 S-B	C4
Sjc-0003700	3.19634e-43	9.45662e-43	1.89973	NIFK	hypotheticial protein	C4
Sjc-0001089	3.66662e-42	1.04264e-41	1.72496	SF3B6	Similar to Sf3b6: Splicing factor 3B subunit 6	C4
Sjc-0004676	3.2269e-41	8.88954e-41	1.74845	COX17	Similar to COX17: Cytochrome c oxidase copper chaperone	C4
Sjc-0000843	5.80671e-171	2.17752e-168	5.20027	RIBC2	Similar to RIBC2: RIB43A-like with coiled-coils protein 2	C5
Sjc-0008415	6.99613e-162	1.90804e-159	4.1283	SJC_0008415	hypothetical protein	C5
Sjc-0003323	4.5743e-147	9.1486e-145	3.84966	BUG22	Similar to Bug22: Cilia- and flagella-associated protein 20	C5
Sjc-0002515	1.13624e-140	1.70436e-138	4.16042	SJC_0002515	hypothetical protein	C5
Sjc-0006616	5.83377e-134	6.25047e-132	3.66669	SJC_0006616	putative microtubule-associated protein 9	C5
Sjc-0004776	1.17844e-131	1.14043e-129	3.41881	CCDC146	Similar to Ccdc146: Coiled-coil domain-containing protein 146	C5
Sjc-0007264	1.72074e-131	1.56431e-129	3.9359	SJC_0007264	spindle assembly checkpoint component MAD1	C5
Sjc-0006578	2.30007e-128	1.72505e-126	3.84925	EXC-7	Similar to elavl2: ELAV-like protein 2	C5
Sjc-0009370	8.3933e-127	5.59553e-125	3.319	SJC_0009370	TNN16301.1 tetraspanin-CD63 receptor	C5
Sjc-0002056	3.45866e-125	2.16166e-123	4.47133	SJC_0002056	zinc finger CCCH domain-containing protein 31	C5
Sjc-0002333	4.74457e-125	2.84674e-123	3.70058	ENKUR	Similar to ENKUR: Enkurin	C5
Sjc-0002085	6.48438e-125	3.81434e-123	3.46475	CDKL1	Similar to Cdkl1: Cyclin-dependent kinase-like 1	C5
Sjc-0002111	2.72713e-124	1.54366e-122	3.97859	SJC_0002111	hypothetical protein	C5
Sjc-0000523	1.26359e-121	6.11414e-120	3.7952	CFAP45	Cilia- and flagella-associated protein	C5
Sjc-0006404	6.25958e-121	2.93418e-119	3.16393	CCDC162P	Similar to Ccdc162: Coiled-coil domain-containing protein 162	C5
Sjc-0003962	1.46703e-116	6.11261e-115	2.58588	SJC_0003962	hypotheticial protein	C5
Sjc-0000288	3.36737e-116	1.38385e-114	3.07941	MNS1	Similar to MNS1: Meiosis-specific nuclear structural protein 1	C5
Sjc-0005281	4.37779e-114	1.72808e-112	3.18518	CCDC173	Similar to CCDC173: Coiled-coil domain-containing protein 173	C5
Sjc-0005354	5.10486e-114	1.98891e-112	2.81338	CCDC65	Similar to CCDC65: Dynein regulatory complex subunit 2	C5
Sjc-0004838	2.14638e-112	8.04893e-111	3.08621	TSNAXIP1	Similar to Tsnaxip1: Translin-associated factor X-interacting protein 1	C5
Sjc-0003867	6.72648e-112	2.31947e-110	3.32597	FOXJ2	Similar to FOXJ3: Forkhead box protein J3	C5
Sjc-0001214	1.79919e-110	5.74209e-109	2.86519	CCDC151	Similar to CCDC151: Coiled-coil domain-containing protein 151	C5
Sjc-0008147	2.08623e-109	6.45224e-108	2.57158	C21ORF2	Protein C21orf2	C5
Sjc-0007024	4.05118e-109	1.24016e-107	2.71618	UBXN11	Similar to UBXN11: UBX domain-containing protein 11	C5
Sjc-0009448	5.86382e-108	1.74173e-106	2.56111	CCDC180	Coiled-coil domain-containing protein	C5
Sjc-0003256	3.03791e-105	8.43865e-104	2.60275	SJC_0003256	Laminin subunit alpha-2	C5
Sjc-0002506	8.15852e-103	2.03963e-101	3.07423	SJC_0002506	putative peptidyl-tRNA hydrolase PTRHD1	C5
Sjc-0009183	8.25573e-103	2.04688e-101	2.84569	RSPH1	Similar to rsph1: Radial spoke head 1 homolog	C5
Sjc-0003493	2.09249e-102	5.10362e-101	2.80461	SJC_0003493	hypothetical protein	C5
Sjc-0005527	8.62365e-102	2.08459e-100	2.65893	SJC_0005527	Tetratricopeptide repeat protein	C5
Sjc-0002133	3.25747e-101	7.6948e-100	3.02161	RAI14	Similar to RAI14: Ankycorbin	C5
Sjc-0009109	9.33769e-100	2.09053e-98	2.64599	CFAP69	Cilia- and flagella-associated protein	C5
Sjc-0000285	9.68928e-100	2.15317e-98	2.79563	EFHC1	Similar to Efhc1: EF-hand domain-containing protein 1	C5
Sjc-0005481	3.09515e-98	6.53906e-97	2.1542	SJC_0005481	Similar to Calmodulin	C5
Sjc-0008716	2.97175e-97	6.06479e-96	2.47532	SJC_0008716	tektin-2	C5
Sjc-0008392	3.27406e-97	6.6366e-96	2.27135	DNAAF1	Similar to DNAAF1: Dynein assembly factor 1%2C axonemal	C5
Sjc-0000734	3.96357e-97	7.98033e-96	2.94902	KIAA1751	Similar to CFAP74: Cilia- and flagella-associated protein 74	C5
Sjc-0002168	5.97076e-97	1.19415e-95	2.62045	EFHC2	Similar to efhc2: EF-hand domain-containing family member C2	C5
Sjc-0004174	7.24477e-97	1.43936e-95	2.65137	ZMYND12	Similar to ZMYND12: Zinc finger MYND domain-containing protein 12	C5
Sjc-0005349	4.39163e-94	7.74994e-93	2.53502	SJC_0005349	hypothetical protein	C5
Sjc-0007156	6.94603e-93	1.17729e-91	2.53575	C9ORF171	Similar to cfap77: Cilia- and flagella-associated protein 77	C5
Sjc-0005011	8.51406e-91	1.34295e-89	2.40764	SJC_0005011	PHD finger protein 10	C5
Sjc-0001792	8.55009e-91	1.34295e-89	2.32547	NEK6	Similar to Nek7: Serine/threonine-protein kinase Nek7	C5
Sjc-0000533	5.08319e-90	7.8606e-89	2.36348	NME8	Similar to CiIC3: Thioredoxin domain-containing protein 3 homolog	C5
Sjc-0005996	1.27145e-89	1.93622e-88	2.31214	CCDC177	Similar to CCDC177: Coiled-coil domain-containing protein 177	C5
Sjc-0007548	1.7074e-89	2.58697e-88	2.45315	TTC30B	Similar to ttc30a: Tetratricopeptide repeat protein 30A	C5
Sjc-0001191	1.97372e-89	2.97546e-88	2.29265	WDR63	Similar to WDR63: WD repeat-containing protein 63	C5
Sjc-0002125	2.40469e-89	3.58909e-88	2.85156	IFT20	Similar to ift20: Intraflagellar transport protein 20 homolog	C5
Sjc-0002581	3.82462e-89	5.65214e-88	2.42674	IFT52	Similar to Ift52: Intraflagellar transport protein 52 homolog	C5
Sjc-0001054	9.92274e-89	1.43619e-87	2.54777	SJC_0001054	Leucine carboxyl methyltransferase 1	C5
Sjc-0008233	2.42936e-88	3.40564e-87	1.99978	RSPH3	Similar to RSPH3: Radial spoke head protein 3 homolog	C5
Sjc-0007192	5.54285e-88	7.62777e-87	2.46338	EFCAB5	EF-hand calcium-binding domain-containing protein 5	C5
Sjc-0003045	5.61352e-88	7.68975e-87	2.17376	ODF3	Similar to odf3b: Outer dense fiber protein 3-B	C5
Sjc-0006683	1.66191e-87	2.23576e-86	3.03851	CFAP44	Similar to CFAP44: Cilia- and flagella-associated protein 44	C5
Sjc-0006213	4.87047e-87	6.41495e-86	2.74525	CFAP43	Similar to Cfap43: Cilia- and flagella-associated protein 43	C5
Sjc-0000096	5.20334e-87	6.78697e-86	2.26156	FAM221A	Similar to Fam221a: Protein FAM221A	C5
Sjc-0003787	1.46078e-86	1.89712e-85	2.9199	TOB1	Similar to TOB2: Protein Tob2	C5
Sjc-0005153	2.23048e-86	2.85959e-85	2.90684	SJC_0005153	DNA double-strand break repair rad50 ATPase	C5
Sjc-0000724	2.46946e-86	3.15251e-85	3.14787	TPCN3	Similar to TPC1: Two pore calcium channel protein 1	C5
Sjc-0004164	1.92806e-85	2.42015e-84	1.93563	CFAP206	Similar to CFAP206: Cilia- and flagella-associated protein 206	C5
Sjc-0004811	1.99392e-85	2.49241e-84	2.63959	C15ORF26	Similar to Cfap161: Cilia- and flagella-associated protein 161	C5
Sjc-0008249	4.03515e-83	4.60284e-82	2.9209	DNAL4	Similar to DNAL4: Dynein light chain 4%2C axonemal	C5
Sjc-0002351	9.32907e-83	1.04042e-81	1.90611	WDR78	Similar to Wdr78: WD repeat-containing protein 78	C5
Sjc-0002403	3.05163e-82	3.3412e-81	2.66287	DNAH6	Similar to DNAH6: Dynein heavy chain 6%2C axonemal	C5
Sjc-0005422	5.5788e-82	6.08597e-81	2.10735	CCDC147	Similar to CFAP58: Cilia- and flagella-associated protein 58	C5
Sjc-0003882	4.52461e-81	4.81342e-80	2.08904	DAB1	Disabled	C5
Sjc-0007141	6.78249e-81	7.1646e-80	2.69852	SJC_0007141	spindle assembly checkpoint component MAD1	C5
Sjc-0008662	1.05308e-79	1.07824e-78	2.79143	KLHL10	Similar to KLHL10: Kelch-like protein 10	C5
Sjc-0005876	1.54433e-79	1.5705e-78	1.7689	SJC_0005876	hypothetical protein	C5
Sjc-0008607	3.63485e-79	3.63485e-78	2.06484	LAMA1	Similar to Lama1: Laminin subunit alpha-1	C5
Sjc-0006133	3.94934e-79	3.92965e-78	2.11726	IFT88	Similar to Ift88: Intraflagellar transport protein 88 homolog	C5
Sjc-0002170	4.13105e-79	4.09015e-78	2.43478	CCDC135	Similar to DRC7: Dynein regulatory complex subunit 7	C5
Sjc-0006022	7.94101e-79	7.81083e-78	1.86674	SPAG6	Similar to Spag6: Sperm-associated antigen 6	C5
Sjc-0008089	1.10287e-78	1.07772e-77	2.01415	DRC1	Similar to DRC1: Dynein regulatory complex protein 1	C5
Sjc-0008781	2.69342e-78	2.58982e-77	2.47235	GAS8	Similar to GAS8: Dynein regulatory complex subunit 4	C5
Sjc-0001211	3.46751e-78	3.3235e-77	2.4699	KLHL10	Similar to Klhl10: Kelch-like protein 10	C5
Sjc-0003567	4.40147e-78	4.17861e-77	2.30633	SJC_0003567	hypothetical protein	C5
Sjc-0006915	8.45483e-78	7.92641e-77	2.353	LRRC9	Similar to Lrrc9: Leucine-rich repeat-containing protein 9	C5
Sjc-0001422	1.8818e-77	1.74241e-76	2.12515	TEKT1	Similar to TEKT1: Tektin-1	C5
Sjc-0008712	2.54594e-77	2.33573e-76	2.32588	TMEM231	transmembrane protein 231	C5
Sjc-0005802	3.43426e-77	3.14109e-76	2.56041	WDR65	Similar to Cfap57: Cilia- and flagella-associated protein 57	C5
Sjc-0007508	1.59978e-76	1.43693e-75	1.91686	CCDC39	Similar to ccdc39: Coiled-coil domain-containing protein 39	C5
Sjc-0007710	5.18452e-76	4.6153e-75	2.03827	SJC_0007710	Van Gogh 2	C5
Sjc-0005734	5.46663e-76	4.85204e-75	2.16754	SJC_0005734	ATP-dependent DNA ligase,IPR000859 CUB,domain-containing protein	C5
Sjc-0008694	5.80305e-76	5.12033e-75	1.95956	C22ORF23	Similar to C22orf23: UPF0193 protein EVG1	C5
Sjc-0007822	2.399e-75	2.06811e-74	2.32939	ASATOR	Similar to Asator: Tau-tubulin kinase homolog Asator	C5
Sjc-0006872	4.26597e-75	3.62547e-74	1.79718	ARMC9	Similar to Armc9: LisH domain-containing protein ARMC9	C5
Sjc-0005739	6.55055e-75	5.52013e-74	1.73369	ZNF474	Similar to ZNF474: Zinc finger protein 474	C5
Sjc-0000942	2.12907e-74	1.76931e-73	2.05422	NEK10	Similar to NEK10: Serine/threonine-protein kinase Nek10	C5
Sjc-0007243	3.54134e-74	2.92672e-73	2.22398	RSPH6A	Similar to Rsph6a: Radial spoke head protein 6 homolog A	C5
Sjc-0002888	5.48415e-74	4.47077e-73	1.73827	SJC_0002888	WD repeat-containing protein	C5
Sjc-0000640	2.12292e-73	1.70744e-72	2.76116	DCST1	E3 ubiquitin-protein ligase DCST1	C5
Sjc-0007344	1.10044e-70	8.1313e-70	1.97963	IQCD	IQ domain-containing protein	C5
Sjc-0006564	4.86503e-69	3.41805e-68	2.18236	HYDIN	Similar to Hydin: Hydrocephalus-inducing protein	C5
Sjc-0006264	8.67608e-69	6.01114e-68	1.77578	LOXHD1	Similar to LOXHD1: Lipoxygenase homology domain-containing protein 1	C5
Sjc-0009406	9.2787e-69	6.41385e-68	2.11394	EFCAB1	Similar to EFCAB1: EF-hand calcium-binding domain-containing protein 1	C5
Sjc-0000422	4.10827e-68	2.77586e-67	2.00976	SJC_0000422	Oxidation resistance protein 1	C5
Sjc-0002877	6.01018e-67	3.91118e-66	2.05765	CEP290	Similar to Cep290: Centrosomal protein of 290 kDa	C5
Sjc-0006307	1.08667e-66	6.9957e-66	1.84807	LRRC58	Similar to lrrc58: Leucine-rich repeat-containing protein 58	C5
Sjc-0002804	3.79182e-66	2.39483e-65	1.85491	SPEF2	Similar to SPEF2: Sperm flagellar protein 2	C5
Sjc-0002810	7.09723e-66	4.42655e-65	1.82354	SJC_0002810	calcyphosin-2-like	C5
Sjc-0002809	3.40101e-65	2.07801e-64	2.31688	DNAH9	Similar to Dynein beta chain%2C ciliary	C5
Sjc-0002399	1.04127e-64	6.29799e-64	2.09812	IFT172	Similar to ift172: Intraflagellar transport protein 172 homolog	C5
Sjc-0002611	1.60067e-64	9.56577e-64	1.8882	DNAH1	Similar to DNAH1: Dynein heavy chain 1%2C axonemal	C5
Sjc-0006568	1.94345e-64	1.15452e-63	1.91379	SJC_0006568	Similar to Caltractin	C5
Sjc-0006530	4.26817e-64	2.50578e-63	1.92435	SPATA4	Spermatogenesis-associated protein 4	C5
Sjc-0004846	1.63347e-63	9.40577e-63	2.07136	IQCA1	Similar to IQCA1: Dynein regulatory complex protein 11	C5
Sjc-0007735	4.01213e-62	2.19242e-61	1.88819	EFCAB10	EF-hand calcium-binding domain-containing protein 10	C5
Sjc-0000534	4.07834e-62	2.22051e-61	1.77268	PKNOX2	DC-STAMP domain-containing protein 2	C5
Sjc-0002167	5.06194e-62	2.74112e-61	1.85724	CLSTN2	Similar to Cals: Calsyntenin-1	C5
Sjc-0006066	5.59804e-58	2.62819e-57	1.99469	SJC_0006066	cellular myosin heavy chain	C5
Sjc-0000498	1.06046e-57	4.94004e-57	1.94485	SJC_0000498	hypothetical protein	C5
Sjc-0001690	1.75503e-57	8.11262e-57	1.7673	XPR1	Similar to XPR1: Xenotropic and polytropic retrovirus receptor 1 homolog	C5
Sjc-0002826	1.58132e-56	7.14451e-56	1.74844	ARMC2	Similar to Armc2: Armadillo repeat-containing protein 2	C5
Sjc-0002252	1.84139e-54	7.84684e-54	1.75277	SJC_0002252	Similar to 33 kDa inner dynein arm light chain%2C axonemal	C5
Sjc-0005719	1.03592e-53	4.35872e-53	2.12154	SJC_0005719	putative Core 1 udp-galactose:n-acetylgalactosamine-alpha-r beta 1 3-galactosyltransferase	C5
Sjc-0007210	3.20758e-52	1.28132e-51	1.84339	RSPH9	Similar to RSPH9: Radial spoke head protein 9 homolog	C5
Sjc-0007008	3.25663e-52	1.29919e-51	2.02971	DNAH2	Similar to Dnah2: Dynein heavy chain 2%2C axonemal	C5
Sjc-0007417	2.11462e-51	8.14359e-51	1.88622	FBXO36	Similar to Fbxo36: F-box only protein 36	C5
Sjc-0003527	3.64152e-49	1.32419e-48	1.83862	TEKT4	Similar to tekt4: Tektin-4	C5
Sjc-0008959	6.9378e-48	2.39786e-47	2.12275	ERBB2	Similar to Egfr: Epidermal growth factor receptor	C5
Sjc-0001566	3.77226e-46	1.22212e-45	2.17555	CCDC170	Similar to CCDC170: Coiled-coil domain-containing protein 170	C5
Sjc-0005224	3.61009e-45	1.13883e-44	1.77686	SU(H)	Similar to RBPJ: Recombining binding protein suppressor of hairless	C5
Sjc-0003007	1.17277e-43	3.52537e-43	1.83543	KOI	Similar to SUN2: SUN domain-containing protein 2	C5
Sjc-0006392	4.56353e-42	1.29401e-41	1.84543	DNAH10	Similar to DNAH10: Dynein heavy chain 10%2C axonemal	C5
Sjc-0003860	3.74432e-38	9.44741e-38	2.0124	SLC25A36	Similar to Rim2: Mitochondrial carrier protein Rim2	C5
Sjc-0006594	1.21957e-34	2.81224e-34	1.77128	SJC_0006594	hypothetical protein	C5
