# Supplementary material for: Dynamic single-cell transcriptomics reveals lsamp-guided neural network formation in male S. japonicum driving female reproduction
Source: Research Square preprint supplement (doi:10.21203/rs.3.rs-6983189/v1), 2025-07-10
Supplement: Supplementary file 14 [file eaa0541258d1b1506a8ae805.xlsx]

## Sheet: Sheet1
Table S10. Detailed enriched GO terms (Biological Process) in male-specific neurons of S. japonicum.
cluster	GO Term ID	Description	GeneRatio	BgRatio	pvalue	p.adjust	qvalue	geneID	Count
beta-2 Neuron	GO:0007268	chemical synaptic transmission	19/90	390/5657	8.30628e-06	0.00383754	0.00354309	Sjc_0005238/Sjc_0006547/Sjc_0001328/Sjc_0004888/Sjc_0001398/Sjc_0004889/Sjc_0006216/Sjc_0004890/Sjc_0002356/Sjc_0009031/Sjc_0001853/Sjc_0001396/Sjc_0003375/Sjc_0001044/Sjc_0000138/Sjc_0002191/Sjc_0008847/Sjc_0002660/Sjc_0007300	19
beta-2 Neuron	GO:0098916	anterograde trans-synaptic signaling	19/90	390/5657	8.30628e-06	0.00383754	0.00354309	Sjc_0005238/Sjc_0006547/Sjc_0001328/Sjc_0004888/Sjc_0001398/Sjc_0004889/Sjc_0006216/Sjc_0004890/Sjc_0002356/Sjc_0009031/Sjc_0001853/Sjc_0001396/Sjc_0003375/Sjc_0001044/Sjc_0000138/Sjc_0002191/Sjc_0008847/Sjc_0002660/Sjc_0007300	19
beta-2 Neuron	GO:0099536	synaptic signaling	19/90	391/5657	8.62087e-06	0.00383754	0.00354309	Sjc_0005238/Sjc_0006547/Sjc_0001328/Sjc_0004888/Sjc_0001398/Sjc_0004889/Sjc_0006216/Sjc_0004890/Sjc_0002356/Sjc_0009031/Sjc_0001853/Sjc_0001396/Sjc_0003375/Sjc_0001044/Sjc_0000138/Sjc_0002191/Sjc_0008847/Sjc_0002660/Sjc_0007300	19
beta-2 Neuron	GO:0099537	trans-synaptic signaling	19/90	391/5657	8.62087e-06	0.00383754	0.00354309	Sjc_0005238/Sjc_0006547/Sjc_0001328/Sjc_0004888/Sjc_0001398/Sjc_0004889/Sjc_0006216/Sjc_0004890/Sjc_0002356/Sjc_0009031/Sjc_0001853/Sjc_0001396/Sjc_0003375/Sjc_0001044/Sjc_0000138/Sjc_0002191/Sjc_0008847/Sjc_0002660/Sjc_0007300	19
beta-2 Neuron	GO:0006836	neurotransmitter transport	13/90	193/5657	9.24708e-06	0.00383754	0.00354309	Sjc_0005238/Sjc_0001328/Sjc_0004888/Sjc_0004889/Sjc_0005944/Sjc_0004890/Sjc_0004668/Sjc_0009031/Sjc_0003375/Sjc_0002191/Sjc_0008847/Sjc_0002660/Sjc_0007300	13
beta-2 Neuron	GO:0007269	neurotransmitter secretion	11/90	147/5657	1.79127e-05	0.00530983	0.00490242	Sjc_0005238/Sjc_0001328/Sjc_0004888/Sjc_0004889/Sjc_0004890/Sjc_0009031/Sjc_0003375/Sjc_0002191/Sjc_0008847/Sjc_0002660/Sjc_0007300	11
beta-2 Neuron	GO:0099643	signal release from synapse	11/90	147/5657	1.79127e-05	0.00530983	0.00490242	Sjc_0005238/Sjc_0001328/Sjc_0004888/Sjc_0004889/Sjc_0004890/Sjc_0009031/Sjc_0003375/Sjc_0002191/Sjc_0008847/Sjc_0002660/Sjc_0007300	11
beta-2 Neuron	GO:0023061	signal release	14/90	246/5657	2.79696e-05	0.00725461	0.00669798	Sjc_0005238/Sjc_0006688/Sjc_0001267/Sjc_0001328/Sjc_0004888/Sjc_0004889/Sjc_0004890/Sjc_0009031/Sjc_0001853/Sjc_0003375/Sjc_0002191/Sjc_0008847/Sjc_0002660/Sjc_0007300	14
delta-3 Neuron	GO:0044782	cilium organization	45/145	270/5657	1.09619e-25	3.06495e-22	2.90548e-22	Sjc_0006903/Sjc_0007950/Sjc_0005065/Sjc_0002877/Sjc_0005047/Sjc_0000533/Sjc_0009183/Sjc_0003162/Sjc_0004164/Sjc_0002581/Sjc_0002403/Sjc_0008781/Sjc_0001687/Sjc_0007799/Sjc_0003605/Sjc_0003323/Sjc_0007243/Sjc_0005354/Sjc_0003361/Sjc_0004158/Sjc_0006133/Sjc_0006016/Sjc_0003081/Sjc_0004768/Sjc_0002064/Sjc_0009342/Sjc_0004312/Sjc_0002399/Sjc_0001404/Sjc_0003837/Sjc_0000734/Sjc_0007210/Sjc_0006904/Sjc…	45
delta-3 Neuron	GO:0060271	cilium assembly	44/145	264/5657	4.3575e-25	6.09179e-22	5.77484e-22	Sjc_0006903/Sjc_0007950/Sjc_0005065/Sjc_0002877/Sjc_0005047/Sjc_0000533/Sjc_0009183/Sjc_0003162/Sjc_0004164/Sjc_0002581/Sjc_0002403/Sjc_0008781/Sjc_0001687/Sjc_0007799/Sjc_0003605/Sjc_0003323/Sjc_0007243/Sjc_0005354/Sjc_0003361/Sjc_0004158/Sjc_0006133/Sjc_0006016/Sjc_0003081/Sjc_0004768/Sjc_0002064/Sjc_0009342/Sjc_0004312/Sjc_0002399/Sjc_0001404/Sjc_0000734/Sjc_0007210/Sjc_0006904/Sjc_0008089/Sjc…	44
delta-3 Neuron	GO:0120031	plasma membrane bounded cell projection assembly	45/145	363/5657	3.40764e-20	2.42886e-17	2.30249e-17	Sjc_0006234/Sjc_0006903/Sjc_0007950/Sjc_0005065/Sjc_0002877/Sjc_0005047/Sjc_0000533/Sjc_0009183/Sjc_0003162/Sjc_0004164/Sjc_0002581/Sjc_0002403/Sjc_0008781/Sjc_0001687/Sjc_0007799/Sjc_0003605/Sjc_0003323/Sjc_0007243/Sjc_0005354/Sjc_0003361/Sjc_0004158/Sjc_0006133/Sjc_0006016/Sjc_0003081/Sjc_0004768/Sjc_0002064/Sjc_0009342/Sjc_0004312/Sjc_0002399/Sjc_0001404/Sjc_0000734/Sjc_0007210/Sjc_0006904/Sjc…	45
delta-3 Neuron	GO:0030031	cell projection assembly	46/145	381/5657	3.47477e-20	2.42886e-17	2.30249e-17	Sjc_0006234/Sjc_0006903/Sjc_0007950/Sjc_0005065/Sjc_0002877/Sjc_0005047/Sjc_0000533/Sjc_0009183/Sjc_0003162/Sjc_0004164/Sjc_0002581/Sjc_0002403/Sjc_0008781/Sjc_0001687/Sjc_0007799/Sjc_0003605/Sjc_0003323/Sjc_0007243/Sjc_0005354/Sjc_0003361/Sjc_0004158/Sjc_0006133/Sjc_0006016/Sjc_0003081/Sjc_0004768/Sjc_0002064/Sjc_0009342/Sjc_0004312/Sjc_0002399/Sjc_0001404/Sjc_0000734/Sjc_0007210/Sjc_0006904/Sjc…	46
delta-3 Neuron	GO:0003341	cilium movement	21/145	69/5657	8.45162e-18	4.72614e-15	4.48025e-15	Sjc_0007950/Sjc_0005065/Sjc_0005047/Sjc_0003162/Sjc_0004164/Sjc_0002403/Sjc_0008781/Sjc_0001687/Sjc_0007243/Sjc_0005354/Sjc_0003361/Sjc_0004768/Sjc_0001404/Sjc_0002809/Sjc_0007210/Sjc_0001214/Sjc_0008883/Sjc_0001537/Sjc_0003192/Sjc_0006392/Sjc_0008275	21
delta-3 Neuron	GO:0035082	axoneme assembly	20/145	65/5657	4.24545e-17	1.97838e-14	1.87545e-14	Sjc_0007950/Sjc_0005065/Sjc_0005047/Sjc_0009183/Sjc_0004164/Sjc_0008781/Sjc_0001687/Sjc_0003605/Sjc_0003323/Sjc_0003361/Sjc_0006133/Sjc_0004768/Sjc_0002064/Sjc_0004312/Sjc_0000734/Sjc_0007210/Sjc_0008089/Sjc_0001214/Sjc_0006022/Sjc_0008275	20
delta-3 Neuron	GO:0001578	microtubule bundle formation	20/145	80/5657	3.83747e-15	1.5328e-12	1.45305e-12	Sjc_0007950/Sjc_0005065/Sjc_0005047/Sjc_0009183/Sjc_0004164/Sjc_0008781/Sjc_0001687/Sjc_0003605/Sjc_0003323/Sjc_0003361/Sjc_0006133/Sjc_0004768/Sjc_0002064/Sjc_0004312/Sjc_0000734/Sjc_0007210/Sjc_0008089/Sjc_0001214/Sjc_0006022/Sjc_0008275	20
delta-3 Neuron	GO:0007018	microtubule-based movement	30/145	216/5657	8.94248e-15	3.1254e-12	2.96279e-12	Sjc_0007950/Sjc_0005065/Sjc_0005047/Sjc_0003162/Sjc_0004164/Sjc_0002581/Sjc_0002403/Sjc_0008781/Sjc_0001687/Sjc_0007243/Sjc_0005354/Sjc_0003361/Sjc_0006133/Sjc_0004768/Sjc_0009342/Sjc_0002399/Sjc_0001404/Sjc_0002809/Sjc_0003837/Sjc_0007210/Sjc_0007008/Sjc_0008249/Sjc_0001214/Sjc_0008883/Sjc_0001537/Sjc_0003192/Sjc_0006392/Sjc_0003445/Sjc_0008275/Sjc_0005561	30
delta-3 Neuron	GO:0001539	cilium or flagellum-dependent cell motility	11/145	24/5657	4.0276e-12	1.12612e-09	1.06753e-09	Sjc_0007950/Sjc_0008781/Sjc_0001687/Sjc_0007243/Sjc_0003361/Sjc_0001404/Sjc_0002809/Sjc_0006683/Sjc_0007210/Sjc_0008089/Sjc_0001537	11
delta-3 Neuron	GO:0060285	cilium-dependent cell motility	11/145	24/5657	4.0276e-12	1.12612e-09	1.06753e-09	Sjc_0007950/Sjc_0008781/Sjc_0001687/Sjc_0007243/Sjc_0003361/Sjc_0001404/Sjc_0002809/Sjc_0006683/Sjc_0007210/Sjc_0008089/Sjc_0001537	11
delta-3 Neuron	GO:0070286	axonemal dynein complex assembly	10/145	26/5657	3.35764e-10	8.53451e-08	8.09047e-08	Sjc_0007950/Sjc_0005065/Sjc_0005047/Sjc_0001687/Sjc_0003605/Sjc_0003361/Sjc_0004312/Sjc_0008089/Sjc_0001214/Sjc_0008275	10
delta-3 Neuron	GO:0060294	cilium movement involved in cell motility	7/145	17/5657	9.87102e-08	2.27212e-05	2.1539e-05	Sjc_0007950/Sjc_0008781/Sjc_0007243/Sjc_0003361/Sjc_0001404/Sjc_0007210/Sjc_0001537	7
delta-3 Neuron	GO:0030317	flagellated sperm motility	10/145	44/5657	1.05642e-07	2.27212e-05	2.1539e-05	Sjc_0007950/Sjc_0000533/Sjc_0008781/Sjc_0003605/Sjc_0003323/Sjc_0003361/Sjc_0006133/Sjc_0002809/Sjc_0006022/Sjc_0006235	10
delta-3 Neuron	GO:0097722	sperm motility	10/145	46/5657	1.66102e-07	3.3173e-05	3.1447e-05	Sjc_0007950/Sjc_0000533/Sjc_0008781/Sjc_0003605/Sjc_0003323/Sjc_0003361/Sjc_0006133/Sjc_0002809/Sjc_0006022/Sjc_0006235	10
delta-3 Neuron	GO:0007368	determination of left/right symmetry	13/145	87/5657	2.41421e-07	4.50009e-05	4.26595e-05	Sjc_0002877/Sjc_0003162/Sjc_0008781/Sjc_0003361/Sjc_0006133/Sjc_0009342/Sjc_0002399/Sjc_0002809/Sjc_0008089/Sjc_0001214/Sjc_0003192/Sjc_0003445/Sjc_0008275	13
delta-3 Neuron	GO:0009799	specification of symmetry	13/145	93/5657	5.36598e-07	8.82546e-05	8.36628e-05	Sjc_0002877/Sjc_0003162/Sjc_0008781/Sjc_0003361/Sjc_0006133/Sjc_0009342/Sjc_0002399/Sjc_0002809/Sjc_0008089/Sjc_0001214/Sjc_0003192/Sjc_0003445/Sjc_0008275	13
delta-3 Neuron	GO:0009855	determination of bilateral symmetry	13/145	93/5657	5.36598e-07	8.82546e-05	8.36628e-05	Sjc_0002877/Sjc_0003162/Sjc_0008781/Sjc_0003361/Sjc_0006133/Sjc_0009342/Sjc_0002399/Sjc_0002809/Sjc_0008089/Sjc_0001214/Sjc_0003192/Sjc_0003445/Sjc_0008275	13
delta-3 Neuron	GO:0036158	outer dynein arm assembly	5/145	12/5657	7.07645e-06	0.00109921	0.00104202	Sjc_0005047/Sjc_0003605/Sjc_0003361/Sjc_0004312/Sjc_0001214	5
delta-3 Neuron	GO:0040040	thermosensory behavior	5/145	13/5657	1.12626e-05	0.00165738	0.00157115	Sjc_0006755/Sjc_0006754/Sjc_0002665/Sjc_0004706/Sjc_0007079	5
delta-3 Neuron	GO:0036159	inner dynein arm assembly	5/145	14/5657	1.71593e-05	0.00239888	0.00227406	Sjc_0007950/Sjc_0005065/Sjc_0001687/Sjc_0003605/Sjc_0003361	5
delta-3 Neuron	GO:1905515	non-motile cilium assembly	8/145	55/5657	6.74691e-05	0.00898303	0.00851565	Sjc_0002877/Sjc_0002581/Sjc_0006133/Sjc_0003081/Sjc_0002064/Sjc_0009342/Sjc_0002399/Sjc_0003445	8
delta-3 Neuron	GO:0050877	nervous system process	26/145	458/5657	8.06643e-05	0.0102517	0.00971831	Sjc_0006755/Sjc_0006754/Sjc_0002665/Sjc_0006945/Sjc_0006075/Sjc_0002468/Sjc_0008405/Sjc_0002167/Sjc_0000580/Sjc_0008378/Sjc_0009180/Sjc_0000107/Sjc_0003162/Sjc_0002581/Sjc_0003605/Sjc_0008381/Sjc_0006133/Sjc_0003837/Sjc_0006904/Sjc_0004420/Sjc_0009087/Sjc_0000518/Sjc_0003445/Sjc_0002072/Sjc_0006235/Sjc_0008959	26
gamma-2 Neuron	GO:0007268	chemical synaptic transmission	25/99	390/5657	6.77907e-09	4.11757e-06	3.61786e-06	Sjc_0006136/Sjc_0000937/Sjc_0002660/Sjc_0005238/Sjc_0006216/Sjc_0002417/Sjc_0002049/Sjc_0001328/Sjc_0008847/Sjc_0001044/Sjc_0005786/Sjc_0009031/Sjc_0001653/Sjc_0004939/Sjc_0002628/Sjc_0000406/Sjc_0009062/Sjc_0000138/Sjc_0003706/Sjc_0001835/Sjc_0006927/Sjc_0005815/Sjc_0009232/Sjc_0004979/Sjc_0003095	25
gamma-2 Neuron	GO:0098916	anterograde trans-synaptic signaling	25/99	390/5657	6.77907e-09	4.11757e-06	3.61786e-06	Sjc_0006136/Sjc_0000937/Sjc_0002660/Sjc_0005238/Sjc_0006216/Sjc_0002417/Sjc_0002049/Sjc_0001328/Sjc_0008847/Sjc_0001044/Sjc_0005786/Sjc_0009031/Sjc_0001653/Sjc_0004939/Sjc_0002628/Sjc_0000406/Sjc_0009062/Sjc_0000138/Sjc_0003706/Sjc_0001835/Sjc_0006927/Sjc_0005815/Sjc_0009232/Sjc_0004979/Sjc_0003095	25
gamma-2 Neuron	GO:0099536	synaptic signaling	25/99	391/5657	7.14545e-09	4.11757e-06	3.61786e-06	Sjc_0006136/Sjc_0000937/Sjc_0002660/Sjc_0005238/Sjc_0006216/Sjc_0002417/Sjc_0002049/Sjc_0001328/Sjc_0008847/Sjc_0001044/Sjc_0005786/Sjc_0009031/Sjc_0001653/Sjc_0004939/Sjc_0002628/Sjc_0000406/Sjc_0009062/Sjc_0000138/Sjc_0003706/Sjc_0001835/Sjc_0006927/Sjc_0005815/Sjc_0009232/Sjc_0004979/Sjc_0003095	25
gamma-2 Neuron	GO:0099537	trans-synaptic signaling	25/99	391/5657	7.14545e-09	4.11757e-06	3.61786e-06	Sjc_0006136/Sjc_0000937/Sjc_0002660/Sjc_0005238/Sjc_0006216/Sjc_0002417/Sjc_0002049/Sjc_0001328/Sjc_0008847/Sjc_0001044/Sjc_0005786/Sjc_0009031/Sjc_0001653/Sjc_0004939/Sjc_0002628/Sjc_0000406/Sjc_0009062/Sjc_0000138/Sjc_0003706/Sjc_0001835/Sjc_0006927/Sjc_0005815/Sjc_0009232/Sjc_0004979/Sjc_0003095	25
gamma-2 Neuron	GO:0050804	modulation of chemical synaptic transmission	18/99	223/5657	3.91942e-08	1.50571e-05	1.32298e-05	Sjc_0006136/Sjc_0000937/Sjc_0002660/Sjc_0005238/Sjc_0002417/Sjc_0001328/Sjc_0005786/Sjc_0009031/Sjc_0001653/Sjc_0004939/Sjc_0002628/Sjc_0000406/Sjc_0001835/Sjc_0006927/Sjc_0005815/Sjc_0009232/Sjc_0004979/Sjc_0003095	18
gamma-2 Neuron	GO:0099177	regulation of trans-synaptic signaling	18/99	223/5657	3.91942e-08	1.50571e-05	1.32298e-05	Sjc_0006136/Sjc_0000937/Sjc_0002660/Sjc_0005238/Sjc_0002417/Sjc_0001328/Sjc_0005786/Sjc_0009031/Sjc_0001653/Sjc_0004939/Sjc_0002628/Sjc_0000406/Sjc_0001835/Sjc_0006927/Sjc_0005815/Sjc_0009232/Sjc_0004979/Sjc_0003095	18
gamma-2 Neuron	GO:0006813	potassium ion transport	10/99	82/5657	1.28343e-06	0.000335799	0.000295046	Sjc_0005710/Sjc_0006136/Sjc_0005006/Sjc_0000937/Sjc_0003666/Sjc_0005238/Sjc_0005013/Sjc_0002049/Sjc_0000053/Sjc_0000406	10
gamma-2 Neuron	GO:0007269	neurotransmitter secretion	13/99	147/5657	1.31115e-06	0.000335799	0.000295046	Sjc_0002660/Sjc_0005238/Sjc_0002417/Sjc_0001328/Sjc_0008847/Sjc_0005786/Sjc_0009031/Sjc_0001653/Sjc_0004939/Sjc_0003706/Sjc_0001835/Sjc_0006927/Sjc_0009232	13
gamma-2 Neuron	GO:0099643	signal release from synapse	13/99	147/5657	1.31115e-06	0.000335799	0.000295046	Sjc_0002660/Sjc_0005238/Sjc_0002417/Sjc_0001328/Sjc_0008847/Sjc_0005786/Sjc_0009031/Sjc_0001653/Sjc_0004939/Sjc_0003706/Sjc_0001835/Sjc_0006927/Sjc_0009232	13
gamma-2 Neuron	GO:0071804	cellular potassium ion transport	9/99	66/5657	1.73091e-06	0.000362705	0.000318687	Sjc_0005710/Sjc_0006136/Sjc_0005006/Sjc_0003666/Sjc_0005238/Sjc_0005013/Sjc_0002049/Sjc_0000053/Sjc_0000406	9
gamma-2 Neuron	GO:0071805	potassium ion transmembrane transport	9/99	66/5657	1.73091e-06	0.000362705	0.000318687	Sjc_0005710/Sjc_0006136/Sjc_0005006/Sjc_0003666/Sjc_0005238/Sjc_0005013/Sjc_0002049/Sjc_0000053/Sjc_0000406	9
gamma-2 Neuron	GO:0042391	regulation of membrane potential	13/99	156/5657	2.57572e-06	0.000494753	0.00043471	Sjc_0005710/Sjc_0006136/Sjc_0005006/Sjc_0000937/Sjc_0002660/Sjc_0005238/Sjc_0005013/Sjc_0002049/Sjc_0001653/Sjc_0007989/Sjc_0006927/Sjc_0009232/Sjc_0004979	13
gamma-2 Neuron	GO:0046928	regulation of neurotransmitter secretion	8/99	53/5657	3.06481e-06	0.000543414	0.000477465	Sjc_0005238/Sjc_0002417/Sjc_0005786/Sjc_0009031/Sjc_0001653/Sjc_0001835/Sjc_0006927/Sjc_0009232	8
gamma-2 Neuron	GO:0017156	calcium ion regulated exocytosis	10/99	93/5657	4.13419e-06	0.000680665	0.000598059	Sjc_0002660/Sjc_0002417/Sjc_0001328/Sjc_0008847/Sjc_0005786/Sjc_0009031/Sjc_0009439/Sjc_0003706/Sjc_0001835/Sjc_0009232	10
gamma-2 Neuron	GO:0006836	neurotransmitter transport	14/99	193/5657	5.35333e-06	0.000822628	0.000722793	Sjc_0000937/Sjc_0002660/Sjc_0005238/Sjc_0002417/Sjc_0001328/Sjc_0008847/Sjc_0005786/Sjc_0009031/Sjc_0001653/Sjc_0004939/Sjc_0003706/Sjc_0001835/Sjc_0006927/Sjc_0009232	14
gamma-2 Neuron	GO:0051588	regulation of neurotransmitter transport	9/99	76/5657	5.76611e-06	0.00083068	0.000729868	Sjc_0000937/Sjc_0005238/Sjc_0002417/Sjc_0005786/Sjc_0009031/Sjc_0001653/Sjc_0001835/Sjc_0006927/Sjc_0009232	9
gamma-2 Neuron	GO:0001505	regulation of neurotransmitter levels	15/99	226/5657	7.17009e-06	0.00097218	0.000854195	Sjc_0000937/Sjc_0002660/Sjc_0005238/Sjc_0002417/Sjc_0001328/Sjc_0008847/Sjc_0005786/Sjc_0009031/Sjc_0001653/Sjc_0004939/Sjc_0003706/Sjc_0001835/Sjc_0006927/Sjc_0005815/Sjc_0009232	15
gamma-2 Neuron	GO:0015872	dopamine transport	6/99	29/5657	8.4612e-06	0.00103602	0.000910292	Sjc_0006136/Sjc_0000937/Sjc_0005238/Sjc_0002417/Sjc_0009031/Sjc_0003095	6
gamma-2 Neuron	GO:0051952	regulation of amine transport	7/99	44/5657	9.16064e-06	0.00103602	0.000910292	Sjc_0006136/Sjc_0000937/Sjc_0003666/Sjc_0005238/Sjc_0002417/Sjc_0009031/Sjc_0001835	7
gamma-2 Neuron	GO:0001508	action potential	8/99	62/5657	1.02706e-05	0.00103602	0.000910292	Sjc_0006136/Sjc_0005006/Sjc_0005238/Sjc_0005013/Sjc_0002049/Sjc_0001653/Sjc_0006927/Sjc_0004979	8
gamma-2 Neuron	GO:0014046	dopamine secretion	5/99	18/5657	1.06089e-05	0.00103602	0.000910292	Sjc_0006136/Sjc_0000937/Sjc_0005238/Sjc_0002417/Sjc_0009031	5
gamma-2 Neuron	GO:0014059	regulation of dopamine secretion	5/99	18/5657	1.06089e-05	0.00103602	0.000910292	Sjc_0006136/Sjc_0000937/Sjc_0005238/Sjc_0002417/Sjc_0009031	5
gamma-2 Neuron	GO:1903307	positive regulation of regulated secretory pathway	5/99	18/5657	1.06089e-05	0.00103602	0.000910292	Sjc_0002417/Sjc_0009031/Sjc_0009439/Sjc_0001835/Sjc_0009232	5
gamma-2 Neuron	GO:0043269	regulation of ion transport	14/99	205/5657	1.07872e-05	0.00103602	0.000910292	Sjc_0006136/Sjc_0005006/Sjc_0000937/Sjc_0003666/Sjc_0005238/Sjc_0002417/Sjc_0005013/Sjc_0009031/Sjc_0001653/Sjc_0002628/Sjc_0001835/Sjc_0006927/Sjc_0005815/Sjc_0005395	14
gamma-2 Neuron	GO:0015672	monovalent inorganic cation transport	14/99	212/5657	1.5846e-05	0.001461	0.00128369	Sjc_0005710/Sjc_0006203/Sjc_0003591/Sjc_0006136/Sjc_0005006/Sjc_0000937/Sjc_0003666/Sjc_0005238/Sjc_0005013/Sjc_0002049/Sjc_0000053/Sjc_0000406/Sjc_0003213/Sjc_0005815	14
gamma-2 Neuron	GO:0014047	glutamate secretion	5/99	20/5657	1.86705e-05	0.00165521	0.00145433	Sjc_0003666/Sjc_0005238/Sjc_0002417/Sjc_0009031/Sjc_0001835	5
gamma-2 Neuron	GO:0023061	signal release	15/99	246/5657	1.99641e-05	0.00170434	0.0014975	Sjc_0006136/Sjc_0000937/Sjc_0002660/Sjc_0005238/Sjc_0002417/Sjc_0001328/Sjc_0008847/Sjc_0005786/Sjc_0009031/Sjc_0001653/Sjc_0004939/Sjc_0003706/Sjc_0001835/Sjc_0006927/Sjc_0009232	15
gamma-2 Neuron	GO:0051046	regulation of secretion	16/99	278/5657	2.11228e-05	0.00171488	0.00150676	Sjc_0006136/Sjc_0000937/Sjc_0003666/Sjc_0002660/Sjc_0005238/Sjc_0002417/Sjc_0008847/Sjc_0005786/Sjc_0009031/Sjc_0000982/Sjc_0001653/Sjc_0009439/Sjc_0001835/Sjc_0006927/Sjc_0009232/Sjc_0007469	16
gamma-2 Neuron	GO:0006812	cation transport	21/99	447/5657	2.16059e-05	0.00171488	0.00150676	Sjc_0005710/Sjc_0006203/Sjc_0003591/Sjc_0006136/Sjc_0005006/Sjc_0000937/Sjc_0003666/Sjc_0002660/Sjc_0005238/Sjc_0002417/Sjc_0005013/Sjc_0002049/Sjc_0009031/Sjc_0000053/Sjc_0001653/Sjc_0000406/Sjc_0003213/Sjc_0006927/Sjc_0005815/Sjc_0004979/Sjc_0003095	21
gamma-2 Neuron	GO:0051937	catecholamine transport	6/99	34/5657	2.23194e-05	0.00171488	0.00150676	Sjc_0006136/Sjc_0000937/Sjc_0005238/Sjc_0002417/Sjc_0009031/Sjc_0003095	6
gamma-2 Neuron	GO:0050433	regulation of catecholamine secretion	5/99	21/5657	2.41667e-05	0.00179691	0.00157884	Sjc_0006136/Sjc_0000937/Sjc_0005238/Sjc_0002417/Sjc_0009031	5
gamma-2 Neuron	GO:0048489	synaptic vesicle transport	10/99	115/5657	2.77452e-05	0.00193796	0.00170277	Sjc_0002417/Sjc_0001328/Sjc_0008847/Sjc_0001044/Sjc_0005786/Sjc_0009031/Sjc_0009439/Sjc_0003706/Sjc_0001835/Sjc_0009232	10
gamma-2 Neuron	GO:0097480	establishment of synaptic vesicle localization	10/99	115/5657	2.77452e-05	0.00193796	0.00170277	Sjc_0002417/Sjc_0001328/Sjc_0008847/Sjc_0001044/Sjc_0005786/Sjc_0009031/Sjc_0009439/Sjc_0003706/Sjc_0001835/Sjc_0009232	10
gamma-2 Neuron	GO:0015837	amine transport	7/99	53/5657	3.23989e-05	0.00219645	0.00192989	Sjc_0006136/Sjc_0000937/Sjc_0003666/Sjc_0005238/Sjc_0002417/Sjc_0009031/Sjc_0001835	7
gamma-2 Neuron	GO:0017157	regulation of exocytosis	8/99	74/5657	3.85218e-05	0.00248854	0.00218653	Sjc_0002660/Sjc_0002417/Sjc_0008847/Sjc_0005786/Sjc_0009031/Sjc_0009439/Sjc_0001835/Sjc_0009232	8
gamma-2 Neuron	GO:0050432	catecholamine secretion	5/99	23/5657	3.88666e-05	0.00248854	0.00218653	Sjc_0006136/Sjc_0000937/Sjc_0005238/Sjc_0002417/Sjc_0009031	5
gamma-2 Neuron	GO:0097479	synaptic vesicle localization	10/99	121/5657	4.31791e-05	0.00268994	0.00236349	Sjc_0002417/Sjc_0001328/Sjc_0008847/Sjc_0001044/Sjc_0005786/Sjc_0009031/Sjc_0009439/Sjc_0003706/Sjc_0001835/Sjc_0009232	10
gamma-2 Neuron	GO:0044057	regulation of system process	14/99	234/5657	4.79434e-05	0.00290814	0.00255521	Sjc_0006136/Sjc_0005006/Sjc_0000937/Sjc_0003666/Sjc_0002660/Sjc_0005238/Sjc_0002049/Sjc_0000982/Sjc_0001653/Sjc_0009439/Sjc_0006927/Sjc_0005815/Sjc_0009232/Sjc_0007469	14
gamma-2 Neuron	GO:0051966	regulation of synaptic transmission	glutamatergic	6/99	39/5657	5.04495e-05	0.0029817	0.00261983	Sjc_0000937/Sjc_0005238/Sjc_0002417/Sjc_0009031/Sjc_0001835/Sjc_0009232	6
gamma-2 Neuron	GO:0045956	positive regulation of calcium ion-dependent exocytosis	4/99	13/5657	5.59129e-05	0.00322198	0.00283096	Sjc_0002417/Sjc_0009031/Sjc_0001835/Sjc_0009232	4
gamma-2 Neuron	GO:0046717	acid secretion	6/99	41/5657	6.75897e-05	0.0036869	0.00323945	Sjc_0000937/Sjc_0003666/Sjc_0005238/Sjc_0002417/Sjc_0009031/Sjc_0001835	6
gamma-2 Neuron	GO:0015893	drug transport	9/99	103/5657	6.87795e-05	0.0036869	0.00323945	Sjc_0003591/Sjc_0006136/Sjc_0000937/Sjc_0005238/Sjc_0002417/Sjc_0009177/Sjc_0009031/Sjc_0002628/Sjc_0003095	9
gamma-2 Neuron	GO:1903522	regulation of blood circulation	9/99	103/5657	6.87795e-05	0.0036869	0.00323945	Sjc_0006136/Sjc_0005006/Sjc_0000937/Sjc_0003666/Sjc_0005238/Sjc_0002049/Sjc_0001653/Sjc_0006927/Sjc_0005815	9
gamma-2 Neuron	GO:0007156	homophilic cell adhesion via plasma membrane adhesion molecules	7/99	60/5657	7.34506e-05	0.00380771	0.00334561	Sjc_0000527/Sjc_0006545/Sjc_0007262/Sjc_0005292/Sjc_0006098/Sjc_0000982/Sjc_0007469	7
gamma-2 Neuron	GO:0008016	regulation of heart contraction	8/99	81/5657	7.43372e-05	0.00380771	0.00334561	Sjc_0006136/Sjc_0005006/Sjc_0000937/Sjc_0003666/Sjc_0005238/Sjc_0001653/Sjc_0006927/Sjc_0005815	8
gamma-2 Neuron	GO:0006887	exocytosis	17/99	343/5657	7.72733e-05	0.00381299	0.00335024	Sjc_0006203/Sjc_0004269/Sjc_0005006/Sjc_0002660/Sjc_0002417/Sjc_0001328/Sjc_0008847/Sjc_0005786/Sjc_0009031/Sjc_0001653/Sjc_0009439/Sjc_0003706/Sjc_0001835/Sjc_0003213/Sjc_0006927/Sjc_0009232/Sjc_0003095	17
gamma-2 Neuron	GO:1903305	regulation of regulated secretory pathway	6/99	42/5657	7.77486e-05	0.00381299	0.00335024	Sjc_0002660/Sjc_0002417/Sjc_0009031/Sjc_0009439/Sjc_0001835/Sjc_0009232	6
gamma-2 Neuron	GO:0034220	ion transmembrane transport	19/99	417/5657	8.69338e-05	0.00417463	0.003668	Sjc_0005710/Sjc_0006203/Sjc_0003591/Sjc_0006136/Sjc_0004269/Sjc_0005006/Sjc_0000937/Sjc_0003666/Sjc_0005238/Sjc_0005013/Sjc_0002049/Sjc_0000053/Sjc_0001653/Sjc_0000406/Sjc_0006927/Sjc_0005815/Sjc_0005395/Sjc_0001476/Sjc_0004979	19
gamma-2 Neuron	GO:0015844	monoamine transport	6/99	44/5657	0.00010171	0.00476029	0.00418258	Sjc_0006136/Sjc_0000937/Sjc_0005238/Sjc_0002417/Sjc_0009031/Sjc_0003095	6
gamma-2 Neuron	GO:0016079	synaptic vesicle exocytosis	8/99	85/5657	0.000105009	0.00476029	0.00418258	Sjc_0002417/Sjc_0001328/Sjc_0008847/Sjc_0005786/Sjc_0009031/Sjc_0003706/Sjc_0001835/Sjc_0009232	8
gamma-2 Neuron	GO:0015800	acidic amino acid transport	5/99	28/5657	0.000105907	0.00476029	0.00418258	Sjc_0003666/Sjc_0005238/Sjc_0002417/Sjc_0009031/Sjc_0001835	5
gamma-2 Neuron	GO:1903530	regulation of secretion by cell	14/99	252/5657	0.00010739	0.00476029	0.00418258	Sjc_0006136/Sjc_0000937/Sjc_0003666/Sjc_0002660/Sjc_0005238/Sjc_0002417/Sjc_0008847/Sjc_0005786/Sjc_0009031/Sjc_0001653/Sjc_0009439/Sjc_0001835/Sjc_0006927/Sjc_0009232	14
gamma-2 Neuron	GO:0030001	metal ion transport	16/99	320/5657	0.000116386	0.00506168	0.00444739	Sjc_0005710/Sjc_0003591/Sjc_0006136/Sjc_0005006/Sjc_0000937/Sjc_0003666/Sjc_0002660/Sjc_0005238/Sjc_0005013/Sjc_0002049/Sjc_0000053/Sjc_0001653/Sjc_0000406/Sjc_0006927/Sjc_0005815/Sjc_0004979	16
gamma-2 Neuron	GO:0009268	response to pH	5/99	29/5657	0.000126208	0.00538723	0.00473343	Sjc_0005710/Sjc_0006203/Sjc_0002660/Sjc_0002628/Sjc_0001835	5
gamma-2 Neuron	GO:0098662	inorganic cation transmembrane transport	15/99	291/5657	0.000138955	0.00582349	0.00511674	Sjc_0005710/Sjc_0006203/Sjc_0003591/Sjc_0006136/Sjc_0005006/Sjc_0000937/Sjc_0003666/Sjc_0005238/Sjc_0005013/Sjc_0002049/Sjc_0000053/Sjc_0001653/Sjc_0000406/Sjc_0006927/Sjc_0005815	15
gamma-2 Neuron	GO:0048278	vesicle docking	6/99	48/5657	0.000167107	0.00687825	0.0060435	Sjc_0002417/Sjc_0001328/Sjc_0009031/Sjc_0003706/Sjc_0001835/Sjc_0009232	6
gamma-2 Neuron	GO:0060281	regulation of oocyte development	5/99	31/5657	0.000175637	0.00700841	0.00615786	Sjc_0002417/Sjc_0006904/Sjc_0009031/Sjc_0001835/Sjc_0009232	5
gamma-2 Neuron	GO:0086010	membrane depolarization during action potential	4/99	17/5657	0.00017635	0.00700841	0.00615786	Sjc_0005238/Sjc_0001653/Sjc_0006927/Sjc_0004979	4
gamma-2 Neuron	GO:0098655	cation transmembrane transport	16/99	333/5657	0.000185303	0.00723939	0.00636081	Sjc_0005710/Sjc_0006203/Sjc_0003591/Sjc_0006136/Sjc_0005006/Sjc_0000937/Sjc_0003666/Sjc_0005238/Sjc_0005013/Sjc_0002049/Sjc_0000053/Sjc_0001653/Sjc_0000406/Sjc_0006927/Sjc_0005815/Sjc_0004979	16
gamma-2 Neuron	GO:0017158	regulation of calcium ion-dependent exocytosis	5/99	32/5657	0.000205297	0.00775754	0.00681608	Sjc_0002660/Sjc_0002417/Sjc_0009031/Sjc_0001835/Sjc_0009232	5
gamma-2 Neuron	GO:0043266	regulation of potassium ion transport	5/99	32/5657	0.000205297	0.00775754	0.00681608	Sjc_0006136/Sjc_0005006/Sjc_0000937/Sjc_0003666/Sjc_0005013	5
gamma-2 Neuron	GO:0044070	regulation of anion transport	5/99	33/5657	0.000238628	0.00887158	0.00779492	Sjc_0003666/Sjc_0005238/Sjc_0002628/Sjc_0001835/Sjc_0005395	5
gamma-2 Neuron	GO:0035249	synaptic transmission	glutamatergic	6/99	52/5657	0.000262025	0.00944957	0.00830276086324936	Sjc_0000937/Sjc_0005238/Sjc_0002417/Sjc_0009031/Sjc_0001835/Sjc_0009232	6
gamma-2 Neuron	GO:0099003	vesicle-mediated transport in synapse	10/99	150/5657	0.000262374	0.00944957	0.00830276	Sjc_0002417/Sjc_0001328/Sjc_0008847/Sjc_0001044/Sjc_0005786/Sjc_0009031/Sjc_0009439/Sjc_0003706/Sjc_0001835/Sjc_0009232	10
gamma-2 Neuron	GO:0007274	neuromuscular synaptic transmission	7/99	74/5657	0.000280279	0.00993913	0.00873291	Sjc_0006216/Sjc_0002417/Sjc_0001328/Sjc_0005786/Sjc_0009031/Sjc_0004939/Sjc_0001835	7
gamma-2 Neuron	GO:0060047	heart contraction	8/99	99/5657	0.000305504	0.0106058	0.00931866	Sjc_0006136/Sjc_0005006/Sjc_0000937/Sjc_0003666/Sjc_0005238/Sjc_0001653/Sjc_0006927/Sjc_0005815	8
gamma-2 Neuron	GO:0098660	inorganic ion transmembrane transport	15/99	313/5657	0.000309792	0.0106058	0.00931866	Sjc_0005710/Sjc_0006203/Sjc_0003591/Sjc_0006136/Sjc_0005006/Sjc_0000937/Sjc_0003666/Sjc_0005238/Sjc_0005013/Sjc_0002049/Sjc_0000053/Sjc_0001653/Sjc_0000406/Sjc_0006927/Sjc_0005815	15
gamma-2 Neuron	GO:0002027	regulation of heart rate	5/99	35/5657	0.000317484	0.0106058	0.00931866	Sjc_0006136/Sjc_0000937/Sjc_0005238/Sjc_0001653/Sjc_0006927	5
gamma-2 Neuron	GO:0006835	dicarboxylic acid transport	5/99	35/5657	0.000317484	0.0106058	0.00931866	Sjc_0003666/Sjc_0005238/Sjc_0002417/Sjc_0009031/Sjc_0001835	5
gamma-2 Neuron	GO:0051606	detection of stimulus	9/99	127/5657	0.000343518	0.0113116	0.00993878	Sjc_0006136/Sjc_0002417/Sjc_0002049/Sjc_0009031/Sjc_0001653/Sjc_0006927/Sjc_0005815/Sjc_0005395/Sjc_0003761	9
gamma-2 Neuron	GO:0048167	regulation of synaptic plasticity	8/99	101/5657	0.000350427	0.0113765	0.00999587	Sjc_0000937/Sjc_0002660/Sjc_0001328/Sjc_0004939/Sjc_0001835/Sjc_0005815/Sjc_0009232/Sjc_0003095	8
