# Supplementary material for: Dynamic single-cell transcriptomics reveals lsamp-guided neural network formation in male S. japonicum driving female reproduction
Source: Research Square preprint supplement (doi:10.21203/rs.3.rs-6983189/v1), 2025-07-10
Supplement: Supplementary file 15 [file f651d1d6ec96f888096c517b.xlsx]

## Sheet: Sheet1
Table S6. Highly expressed genes shared in both male and female gametogenesis in S. japonicum.
gene	pval.f	qval.f	range_pr.f	pval.m	qval.m	range_pr.m	Gene_Name	Annotation	cluster
Sjc-0005275	3.66683e-34	7.43276e-33	1.88106	2.92602e-64	1.72796e-63	2.49088	SJC_0005275	SJCHGC00398 protein	C1
Sjc-0001724	1.5787e-18	1.88689e-17	1.29528	6.81056e-73	5.37676e-72	2.63096	MDH1	Similar to MDH: Malate dehydrogenase%2C cytoplasmic	C1
Sjc-0004562	2.25549e-17	2.59252e-16	1.29659	9.99297e-93	1.6748e-91	2.91054	RPL26L1	Similar to RPL26: 60S ribosomal protein L26	C1
Sjc-0007069	5.29957e-17	5.95458e-16	1.12915	5.31265e-72	4.08665e-71	2.0488	TMX1	Similar to TMX4: Thioredoxin-related transmembrane protein 4	C1
Sjc-0000271	1.99597e-16	2.15392e-15	1.20918	4.08155e-70	2.97923e-69	2.5455	EEF1A1	Similar to eef1as: Elongation factor 1-alpha%2C somatic form	C1
Sjc-0006752	2.6714e-16	2.86222e-15	1.27574	3.76204e-56	1.68198e-55	2.12218	RPL19	Similar to rpl19: 60S ribosomal protein L19	C1
Sjc-0007195	4.34349e-15	4.38737e-14	1.32542	5.83231e-40	1.56223e-39	1.97328	SELENOV	Similar to SELENOW: Selenoprotein W	C1
Sjc-0000660	9.92225421693204E-15	9.92225e-14	1.06429	4.14231e-62	2.25126e-61	2.06217	SJC_0000660	SJCHGC02096 protein	C1
Sjc-0003063	1.39638e-13	1.28897e-12	1.09787	5.91454e-85	7.3019e-84	2.98619	RPS4	Similar to RpS4: 40S ribosomal protein S4	C1
Sjc-0006892	2.57660872546834E-13	2.33529e-12	1.08032	7.9476e-74	6.42663e-73	2.49682	RPS27A	Similar to RpS27A: Ubiquitin-40S ribosomal protein S27a	C1
Sjc-0001945	3.1458e-13	2.82557e-12	1.11746	2.46432e-43	7.33427e-43	1.84036	EEF1G	Similar to Elongation factor 1-gamma	C1
Sjc-0003766	7.34283671183486E-13	6.38508e-12	1.25718	2.46413e-41	6.80699e-41	2.21546	SJC_0003766	Similar to Glutathione S-transferase class-mu 28 kDa isozyme	C1
Sjc-0004023	7.62869e-12	6.16875e-11	1.02198	9.95759e-89	1.43619e-87	2.69296	RPL13A	Similar to RPL13A: 60S ribosomal protein L13a	C1
Sjc-0006832	9.16847e-12	7.33478e-11	0.991145	2.76472e-72	2.13767e-71	2.54213	RPS7	Similar to RPS7: 40S ribosomal protein S7	C1
Sjc-0005486	5.32454e-11	3.9934e-10	1.03305	2.71427e-68	1.84226e-67	2.6185	RPL9	Similar to RpL9: 60S ribosomal protein L9	C1
Sjc-0006875	6.93242e-11	5.14784e-10	0.997818	6.19605e-129	4.76619e-127	3.56752	RPL7A	Similar to RPL7A: 60S ribosomal protein L7a	C1
Sjc-0003339	1.19429e-10	8.71745e-10	0.908385	4.44691e-81	4.74759e-80	2.61607	RPLP0	Similar to rla-0: 60S acidic ribosomal protein P0	C1
Sjc-0005797	2.78947e-10	1.95982e-09	0.915285	1.92525e-79	1.95126e-78	2.57278	RPL31	Similar to RpL31: 60S ribosomal protein L31	C1
Sjc-0006117	4.06836e-10	2.79292e-09	0.988574	3.41379e-47	1.14429e-46	1.87052	GPMA	Similar to gpmA: Probable phosphoglycerate mutase	C1
Sjc-0006351	2.62465e-09	1.72674e-08	0.853322	4.22907e-46	1.36568e-45	1.93835	RPS20	Similar to rps20: 40S ribosomal protein S20	C1
Sjc-0004461	4.1082e-09	2.64477e-08	0.89952	1.09031e-102	2.68109e-101	4.06553	TUBB4B	Similar to TUBB4B: Tubulin beta-4B chain	C1
Sjc-0006480	5.48889e-09	3.46667e-08	0.835496	4.14484e-161	1.03621e-158	4.23461	RPLP1	Similar to RpLP1: 60S acidic ribosomal protein P1	C1
Sjc-0006243	7.77175e-09	4.77771e-08	0.81817	6.35273e-64	3.70062e-63	2.41712	RPS3	Similar to RPS3: 40S ribosomal protein S3	C1
Sjc-0006436	8.17057e-09	5.00239e-08	0.863391	2.4763e-94	4.42197e-93	3.00591	RPS10	Similar to RpS10: 40S ribosomal protein S10	C1
Sjc-0006916	8.43643e-09	5.15464e-08	0.974052	2.38113e-50	8.92924e-50	2.17055	CCT4	Similar to T-complex protein 1 subunit delta	C1
Sjc-0003440	1.02338e-08	6.22744e-08	0.878138	1.08406e-84	1.32202e-83	2.86079	RPL3	Similar to RPL3: 60S ribosomal protein L3	C1
Sjc-0003183	1.07614e-08	6.52203e-08	0.764015	1.92613e-52	7.71483e-52	1.90652	EIF-2GAMMA	Similar to eif2s3: Eukaryotic translation initiation factor 2 subunit 3	C1
Sjc-0001066	1.45187e-08	8.69381e-08	0.784887	2.55656e-84	3.0802e-83	2.56267	RPL35	Similar to Rpl35: 60S ribosomal protein L35	C1
Sjc-0004233	1.47899e-08	8.83859e-08	0.769584	2.96344e-88	4.13503e-87	2.67928	RPL8	Similar to RPL8: 60S ribosomal protein L8	C1
Sjc-0004417	1.98194e-08	1.17739e-07	0.753047	6.06679e-46	1.95493e-45	1.81361	DDAH1	Similar to DDAH1: N	C1
Sjc-0003043	2.07804e-08	1.22719e-07	0.77547	1.05597e-62	5.91027e-62	2.43748	SJC_0003043	Ubiquinol cytochrome c oxidoreductase subunit 6	C1
Sjc-0006276	2.26093e-08	1.32996e-07	0.888965	1.82729e-60	9.30708e-60	2.39487	RPS16	Similar to RpS16: 40S ribosomal protein S16	C1
Sjc-0006542	2.59774e-08	1.50739e-07	0.919676	4.71922e-59	2.29832e-58	2.33984	MGST3	Similar to MGST3: Microsomal glutathione S-transferase 3	C1
Sjc-0008387	3.34173e-08	1.91686e-07	0.779871	4.93667e-58	2.32496e-57	1.85659	BTF3L4	Similar to BTF3L4: Transcription factor BTF3 homolog 4	C1
Sjc-0004660	8.16785e-08	4.3992e-07	0.787167	1.98853e-86	2.57138e-85	2.76281	RPS3A	Similar to SJCHGC01275: 40S ribosomal protein S3a	C1
Sjc-0003174	8.48445e-08	4.55337e-07	0.674728	8.01392e-60	3.98042e-59	1.88185	DERL1	Similar to DERL1: Derlin-1	C1
Sjc-0007456	1.47211e-07	7.7074e-07	0.807286	2.18797e-86	2.81713e-85	2.96137	FAU	Similar to RPS30A: 40S ribosomal protein S30	C1
Sjc-0008906	1.49047e-07	7.7899e-07	0.75776	5.66302e-132	5.66302e-130	3.53653	GNB2L1	Similar to gnb2l1: Guanine nucleotide-binding protein subunit beta-2-like 1	C1
Sjc-0001802	2.55773e-07	1.29396e-06	0.790743	8.45791e-69	5.87355e-68	2.37913	RPL37A	Similar to 60S ribosomal protein L37a	C1
Sjc-0006505	4.56608e-07	2.23828e-06	0.763812	3.4085e-89	5.06213e-88	2.91511	RPS15	Similar to RPS15: 40S ribosomal protein S15	C1
Sjc-0005205	5.97419e-07	2.90479e-06	0.693101	1.49597e-45	4.75415e-45	1.7618	SJC_0005205	hypothetical protein	C1
Sjc-0005210	7.91028e-07	3.7788e-06	0.66525	2.45319e-123	1.29115e-121	3.15465	RPS2	Similar to RPS2: 40S ribosomal protein S2	C1
Sjc-0008746	1.07972e-06	5.10103e-06	0.714701	5.68703e-85	7.05004e-84	2.68953	RPL10	Similar to RpL10: 60S ribosomal protein L10	C1
Sjc-0008418	1.13891e-06	5.32202e-06	0.748635	8.44042e-84	1.00084e-82	2.94893	RPL24	Similar to RPL24: 60S ribosomal protein L24	C1
Sjc-0009230	1.23199e-06	5.73021e-06	0.641896	1.27076e-122	6.4615e-121	3.38721	RPS27	Similar to RPS27: 40S ribosomal protein S27	C1
Sjc-0006699	1.67256e-06	7.64889e-06	0.724431	2.98515e-90	4.64013e-89	2.8839	RPS14	Similar to RPS14: 40S ribosomal protein S14	C1
Sjc-0002786	1.79404e-06	8.14238e-06	0.700885	1.32041e-108	4.00123e-107	3.13632	RPL21	Similar to RPL21: 60S ribosomal protein L21	C1
Sjc-0006622	2.23794e-103	2.91905e-101	2.83834	9.05476e-172	3.88061e-169	4.23886	NANOS1	Similar to NANOS1: Nanos homolog 1	C2
Sjc-0005346	3.96678e-47	1.08185e-45	1.94415	1.54819e-57	7.18975e-57	2.18525	SJC_0005346	SJCHGC09521 protein	C2
Sjc-0002078	2.21929e-44	5.69048e-43	2.86801	1.835e-106	5.29327e-105	4.80429	H1F0	Similar to Histone H1-delta	C2
Sjc-0003208	3.72419e-44	9.38871e-43	1.52983	5.16892e-68	3.46907e-67	2.46082	ARL14EPL	TNN04899.1 ARL14 effector protein	C2
Sjc-0001195	4.34657e-38	9.95399e-37	2.0425	2.3729e-134	2.63655e-132	3.63067	CIB	putative beta thymosin	C2
Sjc-0004092	1.08579e-36	2.39512e-35	1.96682	4.36929e-144	7.71052e-142	3.99731	NASP	Similar to Nasp: Nuclear autoantigenic sperm protein	C2
Sjc-0002426	1.58881e-36	3.47915e-35	1.71478	1.56043e-77	1.44932e-76	2.49057	RACGAP1	Similar to Racgap1: Rac GTPase-activating protein 1	C2
Sjc-0004715	1.78354e-34	3.66481e-33	1.26741	2.05279e-63	1.17526e-62	1.80569	PCDHA8	Similar to PCDHA8: Protocadherin alpha-8	C2
Sjc-0007353	1.40325e-32	2.71597e-31	1.45619	1.67956e-47	5.71277e-47	1.73082	MCM5	Similar to mcm5: DNA replication licensing factor mcm5	C2
Sjc-0007765	1.62611e-30	2.94434e-29	1.90126	2.42735e-176	1.82051e-173	4.50499	CBX1	Similar to Cbx3: Chromobox protein homolog 3	C2
Sjc-0007623	1.6292e-30	2.94434e-29	1.3117	7.85089e-49	2.82406e-48	1.73473	SJC_0007623	Proteinase inhibitor I25, cystatin,domain-containing protein	C2
Sjc-0005962	2.42884e-29	4.28619e-28	2.13613	3.51661e-87	4.66807e-86	3.98301	NANOS2	Similar to NANOS2: Nanos homolog 2	C2
Sjc-0001338	1.19123e-27	1.99648e-26	1.26532	3.31334e-45	1.04852e-44	1.74571	FLOT2	Similar to Flo2: Flotillin-2	C2
Sjc-0000924	4.55853e-27	7.39221e-26	1.47735	4.48989e-172	2.24494e-169	4.04898	AGO2	Similar to Ago2: Protein argonaute-2	C2
Sjc-0004496	2.00175e-22	2.90109e-21	1.31297	1.50634e-90	2.35365e-89	2.51553	LRWD1	Similar to lrwd1: Leucine-rich repeat and WD repeat-containing protein 1	C2
Sjc-0006586	4.44344e-20	5.72117e-19	1.22224	1.00319e-65	6.24392e-65	2.17355	SMC1B	Similar to SMC1A: Structural maintenance of chromosomes protein 1A	C2
Sjc-0007879	4.84721e-20	6.21437e-19	1.01748	2.60738e-94	4.62848e-93	2.2566	ZMYM3	Similar to ZMYM3: Zinc finger MYM-type protein 3	C2
Sjc-0000801	5.16848e-19	6.35469e-18	1.22653	3.30752e-56	1.48541e-55	2.04912	SJC_0000801	SJCHGC09526 protein	C2
Sjc-0001194	2.0546e-16	2.20924e-15	1.01191	3.32483e-117	1.42493e-115	2.93404	TP73	p53 transcription factor DNA binding	C2
Sjc-0004938	2.51861e-15	2.57001e-14	1.02068	4.42419e-98	9.28151e-97	2.57218	SJC_0004938	Lamino-associated polypeptide 2/emerin,domain-containing protein	C2
Sjc-0001571	5.14849e-15	5.18304e-14	1.07682	8.68383e-110	2.7137e-108	2.68751	SJC_0001571	SJCHGC05920 protein	C2
Sjc-0004797	1.18173e-14	1.1739e-13	0.788128	8.68767e-67	5.61703e-66	1.82966	SJC_0004797	SJCHGC09517 protein	C2
Sjc-0000803	6.35801e-14	6.03609e-13	1.10728	2.07245e-56	9.34941e-56	2.13674	SLC25A3	Similar to SLC25A3: Phosphate carrier protein%2C mitochondrial	C2
Sjc-0003845	2.00485e-13	1.83371e-12	0.973381	2.59278e-112	9.60288e-111	2.91341	MCM7	Similar to mcm7-a: DNA replication licensing factor mcm7-A	C2
Sjc-0000688	2.13359e-12	1.81325e-11	1.04405	1.7429e-38	4.45754e-38	1.85875	ALPHA-SPEC	Similar to alpha-Spec: Spectrin alpha chain	C2
Sjc-0000626	4.8674e-12	4.00061e-11	0.884978	4.07363e-58	1.92758e-57	1.91737	BET-1	Similar to BRDT: Bromodomain testis-specific protein	C2
Sjc-0004781	6.75338e-12	5.47571e-11	0.727755	2.08016e-72	1.6209e-71	2.06034	TTC37	Tetratricopeptide repeat protein	C2
Sjc-0006275	1.13749e-11	9.0277e-11	0.863882	9.43196e-61	4.8535e-60	2.09584	KIF11	Similar to KIF11: Kinesin-like protein KIF11	C2
Sjc-0006349	5.2039e-11	3.91271e-10	0.822505	4.3588e-53	1.80116e-52	2.01223	AM	Similar to AM: Gelsolin-like protein 1	C2
Sjc-0003090	9.90303e-11	7.29953e-10	0.699781	9.92233e-63	5.56392e-62	2.02795	SJC_0003090	SJCHGC07937 protein	C2
Sjc-0009101	2.9403e-10	2.05137e-09	0.793905	2.61155e-69	1.84345e-68	2.15445	SJC_0009101	SJCHGC05417 protein	C2
Sjc-0008704	5.08327e-10	3.46586e-09	0.697551	2.83235e-70	2.07752e-69	1.85306	ARMC1	Similar to ARMC1: Armadillo repeat-containing protein 1	C2
Sjc-0009285	2.71261e-09	1.77682e-08	0.841159	1.38633e-130	1.18828e-128	3.60895	HNRNPK	Similar to PCBP3: Poly	C2
Sjc-0003489	4.57466e-09	2.93248e-08	0.832964	2.0606e-177	2.0606e-174	4.79942	SJC_0003489	putative prothymosin alpha-B	C2
Sjc-0002633	7.0558e-09	4.35543e-08	0.704295	1.19677e-54	5.12899e-54	1.8325	SMC2	Similar to Smc2: Structural maintenance of chromosomes protein 2	C2
Sjc-0008209	3.52994e-08	2.01328e-07	0.636355	1.7571e-52	7.05662e-52	1.81171	TK2	Similar to Tk2: Thymidine kinase 2%2C mitochondrial	C2
Sjc-0002922	4.23344e-07	2.09231e-06	0.539234	4.67639e-93	7.97111e-92	2.27124	LIN54	Similar to lin54: Protein lin-54 homolog	C2
Sjc-0003642	8.80409e-25	1.39012e-23	1.55539	2.00078e-76	1.79174e-75	2.57733	SJC_0003642	Similar to Transmembrane protein 256 homolog	C3
Sjc-0001280	3.31915e-20	4.32932e-19	1.51562	1.14687e-120	5.29325e-119	3.67442	RHOA	Similar to RHO: Ras-like GTP-binding protein RHO	C3
Sjc-0006600	5.56553e-15	5.58415e-14	0.892039	8.71886e-80	9.01951e-79	2.29674	SJC_0006600	Similar to Putative acyl-CoA-binding protein	C3
Sjc-0003238	8.73203e-14	8.18628e-13	0.891521	9.57036e-55	4.10745e-54	2.073	ASF1A	Similar to asf1aa: Histone chaperone asf1a-A	C3
Sjc-0000909	9.05017e-14	8.43183e-13	0.961015	1.3616e-80	1.42826e-79	2.37976	SDHC	Similar to Sdhc: Succinate dehydrogenase cytochrome b560 subunit%2C mitochondrial	C3
Sjc-0001667	4.36192e-13	3.88301e-12	1.0705	4.70656e-60	2.34546e-59	2.28141	YWHAB	Similar to YWHAB: 14-3-3 protein beta/alpha	C3
Sjc-0000999	3.51624e-12	2.9302e-11	1.01259	6.97633e-103	1.75874e-101	2.88932	SJC_0000999	Zinc finger, C2H2-type domain-containing protein	C3
Sjc-0007927	3.53089e-12	2.93426e-11	0.886856	1.00497e-75	8.81555e-75	2.17762	UBE2C	Similar to UBE2C: Ubiquitin-conjugating enzyme E2 C	C3
Sjc-0001447	4.40981e-12	3.63446e-11	0.801517	3.47989e-62	1.90853e-61	1.88717	SJC_0001447	hypothetical protein	C3
Sjc-0005297	5.06573e-12	4.15224e-11	0.934781	3.23607e-56	1.4555e-55	2.01414	DNAJC9	Similar to Dnajc9: DnaJ homolog subfamily C member 9	C3
Sjc-0004922	3.34716e-11	2.55508e-10	1.10037	8.27907e-176	4.96744e-173	4.46156	SJC_0004922	Similar to Tubulin alpha-1 chain	C3
Sjc-0003149	4.35248e-11	3.29733e-10	0.81328	8.32034e-123	4.30363e-121	3.06568	RPA2	Similar to RPA2: Replication protein A 32 kDa subunit	C3
Sjc-0000499	6.28372e-11	4.67771e-10	0.877428	1.43755e-32	3.10486e-32	1.87292	SJC_0000499	SJCHGC05668 protein	C3
Sjc-0004116	1.78751e-10	1.27984e-09	0.885364	7.42503e-61	3.83392e-60	2.12468	SJC_0004116	NADH dehydrogenase ubiquinone 1 beta	C3
Sjc-0000370	7.40897e-10	5.02871e-09	0.748126	1.26652e-76	1.14101e-75	2.12197	SJC_0000370	Protein CNPPD1	C3
Sjc-0004356	1.21802e-09	8.10212e-09	0.721733	5.4348e-95	9.94171e-94	2.21018	PMPCA	Similar to PMPCA: Mitochondrial-processing peptidase subunit alpha	C3
Sjc-0008261	3.60429e-09	2.33539e-08	0.973666	3.14266e-108	9.42798e-107	3.37771	PCNA	Similar to pcna: Proliferating cell nuclear antigen	C3
Sjc-0008266	6.38476e-09	3.98218e-08	0.748683	7.14474e-82	7.76602e-81	2.35836	ACTBA	Similar to actba: Actin%2C cytoplasmic 1	C3
Sjc-0007773	8.13662e-09	4.99179e-08	1.03204	1.41852e-79	1.44747e-78	3.385	SJC_0007773	Similar to Fatty acid-binding protein	C3
Sjc-0001389	8.49557e-09	5.18023e-08	0.805093	1.26293e-92	2.10489e-91	2.70561	CBR3	Similar to CBR1: Carbonyl reductase [NADPH] 1	C3
Sjc-0003813	1.21333e-08	7.30922e-08	0.750138	1.233e-75	1.07529e-74	2.17206	SJC_0003813	PERQ amino acid-rich with GYF domain-containing protein	C3
Sjc-0009405	1.22995e-08	7.39447e-08	0.758546	8.68578e-102	2.08459e-100	2.64121	SJC_0009405	SJCHGC05964 protein	C3
Sjc-0005896	2.00202e-08	1.18697e-07	0.804703	4.05556e-75	3.45644e-74	2.25059	COX5A	Similar to cox-5A: Cytochrome c oxidase subunit 5A%2C mitochondrial	C3
Sjc-0005573	3.36582e-08	1.92699e-07	0.777703	2.04514e-78	1.97917e-77	2.31846	MRPL32	large subunit ribosomal protein L32	C3
Sjc-0007350	4.64471e-08	2.58518e-07	0.699788	1.67622e-69	1.19163e-68	2.18	SJC_0007350	disks large associated 5	C3
Sjc-0007369	5.13799e-08	2.84916e-07	0.659958	7.03539e-63	3.96733e-62	1.83378	PCYOX1L	Similar to Pcyox1: Prenylcysteine oxidase	C3
Sjc-0004113	5.30072e-08	2.92319e-07	0.827316	1.86991e-35	4.38946e-35	1.86041	ZIP	Similar to zip: Myosin heavy chain%2C non-muscle	C3
Sjc-0008143	5.51876e-08	3.03785e-07	0.716414	6.00967e-79	5.93059e-78	2.44918	MYL12A	Similar to MYL12A: Myosin regulatory light chain 12A	C3
Sjc-0008119	7.4032e-08	4.00173e-07	0.712293	1.67237e-57	7.74246e-57	2.03296	DEK	Similar to DEK: Protein DEK	C3
Sjc-0006988	1.42731e-07	7.51214e-07	0.640206	2.20557e-59	1.08649e-58	1.92144	UBFD1	Similar to UBFD1: Ubiquitin domain-containing protein UBFD1	C3
Sjc-0000699	1.7931e-07	9.27464e-07	0.67888	1.54832e-83	1.80037e-82	2.24355	BCAS2	Similar to bcas2: Pre-mRNA-splicing factor SPF27	C3
Sjc-0007880	1.84402e-07	9.50524e-07	0.675288	1.51746e-81	1.62585e-80	2.32798	ITPA	Similar to CG8891: Inosine triphosphate pyrophosphatase	C3
Sjc-0003799	1.98841e-07	1.02145e-06	0.801516	5.81882e-122	2.86171e-120	3.57462	SRSF12	Similar to SRSF12: Serine/arginine-rich splicing factor 12	C3
Sjc-0001219	2.08599e-07	1.06791e-06	0.605387	1.2596e-88	1.80804e-87	2.24359	NTHL1	Similar to NTHL1: Endonuclease III-like protein 1	C3
Sjc-0009444	2.43907e-07	1.23601e-06	0.778332	4.1324e-112	1.51185e-110	3.19782	SJC_0009444	Similar to Histone H2A%2C embryonic	C3
Sjc-0008465	3.37405e-07	1.68703e-06	0.639632	3.4989e-96	6.81604e-95	2.3537	SJC_0008465	SJCHGC01535 protein	C3
Sjc-0000103	5.02169e-07	2.4576e-06	0.844209	4.58337e-77	4.15411e-76	2.85833	SJC_0000103	SJCHGC02564 protein	C3
Sjc-0003578	5.71396e-07	2.78277e-06	0.701268	4.63022e-64	2.70773e-63	2.0246	LSM4	Similar to LSM4: U6 snRNA-associated Sm-like protein LSm4	C3
Sjc-0002161	7.05882e-07	3.41006e-06	0.648857	1.08131e-71	8.17112e-71	2.21224	SDHB	Similar to SDHB: Succinate dehydrogenase [ubiquinone] iron-sulfur subunit%2C mitochondrial	C3
Sjc-0001768	9.21879e-07	4.38294e-06	0.743671	2.90983e-92	4.79643e-91	2.77226	RBM4.1	Similar to rbm4.1: RNA-binding protein 4.1	C3
Sjc-0006751	1.02328e-06	4.84965e-06	0.55078	5.8583e-68	3.91423e-67	1.76011	NUP50	Similar to NUP50: Nuclear pore complex protein Nup50	C3
Sjc-0007674	1.08664e-06	5.12567e-06	0.597503	2.87779e-57	1.31606e-56	1.87702	SAAL1	Similar to saal1: Protein saal1	C3
Sjc-0003148	1.39686e-06	6.44703e-06	0.606618	5.73485e-68	3.8403e-67	2.34276	TOPORS	Similar to STUB1: STIP1 homology and U box-containing protein 1	C3
Sjc-0009474	1.83201e-06	8.30217e-06	0.578829	4.92025e-76	4.39308e-75	2.13898	SARNP	SAP domain-containing ribonucleoprotein	C3
Sjc-0006804	1.89649e-06	8.56847e-06	0.59006	1.42908e-73	1.15248e-72	2.0767	NPP-9	Similar to Ranbp2: E3 SUMO-protein ligase RanBP2	C3
Sjc-0004960	3.16727e-58	1.11786e-56	2.81276	4.79791e-169	1.5993e-166	5.73795	HMGB3	Similar to Dsp1: High mobility group protein DSP1	C4
Sjc-0008371	3.8006e-52	1.1517e-50	2.4199	3.75495e-40	1.00849e-39	2.28128	SJC_0008371	Calcium-binding EF-hand,domain-containing protein	C4
Sjc-0002314	2.07489e-36	4.51064e-35	1.57748	8.65275e-41	2.36199e-40	1.84699	REC8	ubiquitin-activating enzyme E1 C	C4
Sjc-0000158	1.54872e-25	2.47137e-24	1.44511	1.3413e-95	2.563e-94	3.34546	TSP42ED	Similar to 23 kDa integral membrane protein	C4
Sjc-0001899	4.35012e-24	6.72699e-23	1.23416	6.57095e-101	1.54007e-99	2.6916	LBR	Similar to Lbr: Delta	C4
Sjc-0003960	1.7394e-19	2.16523e-18	1.27134	1.13792e-51	4.4508e-51	1.93167	SJC_0003960	Similar to Histone H3.2	C4
Sjc-0007351	3.70138e-19	4.58849e-18	1.22731	3.51847e-56	1.57543e-55	2.21559	SPTBN1	Similar to beta-Spec: Spectrin beta chain	C4
Sjc-0005442	5.21086e-19	6.38065e-18	1.15742	2.58388e-83	2.96998e-82	2.64119	SMC3	Similar to smc3: Structural maintenance of chromosomes protein 3	C4
Sjc-0007282	2.26833e-14	2.22385e-13	0.984175	2.11562e-72	1.64002e-71	2.22248	SJC_0007282	Similar to Alpha-actinin	C4
Sjc-0002995	2.79061e-07	1.40232e-06	0.7084	1.50016e-111	5.00052e-110	3.35629	TUBB4B	Similar to TUBB4B: Tubulin beta-4B chain	C4
Sjc-0007425	3.54349e-226	1.06305e-222	4.41073	4.28931e-78	4.08506e-77	2.26083	SJC_0007425	Homeobox protein	C5
Sjc-0001687	4.81552e-137	1.80582e-134	2.66772	6.32719e-89	9.21436e-88	2.84782	DNAH7	Similar to DNAH7: Dynein heavy chain 7%2C axonemal	C5
Sjc-0003157	9.93111e-134	3.31037e-131	4.47798	1.95012e-25	3.40335e-25	1.87576	SJC_0003157	SJCHGC08553 protein	C5
Sjc-0001596	6.18236e-119	1.23647e-116	2.81455	5.05666e-58	2.37774e-57	1.8277	SJC_0001596	hypothetical protein	C5
Sjc-0003694	5.58124e-106	7.9732e-104	3.56556	2.11892e-48	7.45224e-48	2.1776	SJC_0003694	hypothetical protein	C5
Sjc-0006464	6.85873e-94	6.23521e-92	2.54787	5.44486e-41	1.49447e-40	1.89229	SJC_0006464	Similar to Fructose-bisphosphate aldolase	C5
Sjc-0008930	1.77693e-90	1.36687e-88	1.90029	6.35594e-112	2.21719e-110	4.14351	SJC_0008930	FFD TFG box motifs	C5
Sjc-0006156	5.75449e-87	4.01476e-85	2.25613	2.10967e-60	1.07271e-59	1.82562	SJC_0006156	SJCHGC03205 protein	C5
Sjc-0008111	1.915e-72	1.02589e-70	2.37785	1.87025e-64	1.11324e-63	2.66751	ATP6V0E1	Similar to vha-17: V-type proton ATPase subunit e	C5
Sjc-0007468	4.43494e-72	2.33418e-70	2.19321	1.20417e-62	6.71472e-62	1.76922	ANKRD45	Ankyrin repeat domain-containing protein 45	C5
Sjc-0000714	2.43946e-54	7.62331e-53	1.94736	7.09194e-39	1.83571e-38	1.72785	SJC_0000714	SJCHGC04896 protein	C5
Sjc-0001520	1.19694e-46	3.2061e-45	1.48337	4.72957e-117	1.99841e-115	3.57129	ISY1	SJCHGC02082 protein	C5
Sjc-0004508	1.40715e-34	2.91134e-33	1.18922	1.77813e-54	7.58804e-54	1.8945	ARL3	Similar to arl3: ADP-ribosylation factor-like protein 3	C5
Sjc-0006707	1.63068e-24	2.56128e-23	1.02574	4.87536e-87	6.41495e-86	2.70245	SLC7A8	Similar to SLC7A8: Large neutral amino acids transporter small subunit 2	C5
Sjc-0002320	1.30228e-21	1.79213e-20	1.29487	1.31543e-55	5.76943e-55	2.26376	FHL2	Similar to Fhl2: Four and a half LIM domains protein 2	C5
Sjc-0007362	5.38326e-17	6.02604e-16	1.11995	1.99252e-75	1.72264e-74	3.4884	SJC_0007362	normocyte-binding 1	C5
Sjc-0009342	1.64356e-10	1.18526e-09	0.636591	5.20001e-66	3.2636e-65	2.52882	IFT74	Similar to IFT74: Intraflagellar transport protein 74 homolog	C5
