# Supplementary material for: Dynamic single-cell transcriptomics reveals lsamp-guided neural network formation in male S. japonicum driving female reproduction
Source: Research Square preprint supplement (doi:10.21203/rs.3.rs-6983189/v1), 2025-07-10
Supplement: Supplementary file 16 [file fac240fb9faf1e8a29b249bc.xlsx]

## Sheet: Sheet1
Table S13. Enriched GO Terms (Biological Process) for downregulated genes in lsamp RNAi males of S. japonicum.
GO term ID	Description	setSize	enrichmentScore	NES	pvalue	p.adjust	qvalues	rank	leading_edge	core_enrichment
GO:0006091	generation of precursor metabolites and energy	240	-0.488585	-2.07839	1.24699e-08	5.81972e-05	5.4172e-05	1773	tags=38%, list=20%, signal=31%	Sjc_0009112/Sjc_0007065/Sjc_0001680/Sjc_0002981/Sjc_0004729/Sjc_0001280/Sjc_0000785/Sjc_0005540/Sjc_0002830/Sjc_0007190/Sjc_0003533/Sjc_0002658/Sjc_0005149/Sjc_0005935/Sjc_0008345/Sjc_0005387/Sjc_0003314/Sjc_0003096/Sjc_0002662/Sjc_0005151/Sjc_0002388/Sjc_0009445/Sjc_0002490/Sjc_0003094/Sjc_0001642/Sjc_0009249/Sjc_0004135/Sjc_0003364/Sjc_0009284/Sjc_0000589/Sjc_0002412/Sjc_0007263/Sjc_0008820/Sjc…
GO:0043043	peptide biosynthetic process	470	-0.389684	-1.78889	2.81788e-08	6.57553e-05	6.12074e-05	1847	tags=34%, list=21%, signal=29%	Sjc_0001062/Sjc_0007645/Sjc_0001902/Sjc_0007161/Sjc_0004548/Sjc_0009437/Sjc_0008816/Sjc_0002725/Sjc_0007456/Sjc_0005664/Sjc_0001165/Sjc_0006101/Sjc_0001671/Sjc_0005634/Sjc_0001280/Sjc_0007778/Sjc_0003009/Sjc_0000785/Sjc_0009230/Sjc_0005536/Sjc_0007124/Sjc_0005339/Sjc_0002904/Sjc_0001212/Sjc_0006312/Sjc_0008939/Sjc_0003712/Sjc_0002913/Sjc_0002651/Sjc_0006146/Sjc_0005277/Sjc_0000643/Sjc_0001577/Sjc…
GO:0046034	ATP metabolic process	151	-0.533866	-2.12276	9.10811e-08	0.000141692	0.000131892	1670	tags=43%, list=19%, signal=35%	Sjc_0001280/Sjc_0000785/Sjc_0005540/Sjc_0003533/Sjc_0005149/Sjc_0008345/Sjc_0005387/Sjc_0003314/Sjc_0003096/Sjc_0005151/Sjc_0009292/Sjc_0004620/Sjc_0009445/Sjc_0002490/Sjc_0003094/Sjc_0004135/Sjc_0009284/Sjc_0002412/Sjc_0007263/Sjc_0000770/Sjc_0008820/Sjc_0007951/Sjc_0007032/Sjc_0001070/Sjc_0004116/Sjc_0005974/Sjc_0009105/Sjc_0003792/Sjc_0003604/Sjc_0000303/Sjc_0006031/Sjc_0008801/Sjc_0005478/Sjc…
GO:0015980	energy derivation by oxidation of organic compounds	164	-0.517156	-2.09135	1.56209e-07	0.000175604	0.000163458	1743	tags=39%, list=20%, signal=32%	Sjc_0007065/Sjc_0001680/Sjc_0004729/Sjc_0000785/Sjc_0005540/Sjc_0007190/Sjc_0003533/Sjc_0002658/Sjc_0005149/Sjc_0005935/Sjc_0008345/Sjc_0003314/Sjc_0002662/Sjc_0005151/Sjc_0002388/Sjc_0009445/Sjc_0003094/Sjc_0001642/Sjc_0009284/Sjc_0000589/Sjc_0002412/Sjc_0007263/Sjc_0007032/Sjc_0001070/Sjc_0001934/Sjc_0004116/Sjc_0005974/Sjc_0003810/Sjc_0003638/Sjc_0009105/Sjc_0003792/Sjc_0004570/Sjc_0006031/Sjc…
GO:0006412	translation	454	-0.39051	-1.7828	1.88133e-07	0.000175604	0.000163458	1847	tags=35%, list=21%, signal=29%	Sjc_0001062/Sjc_0007645/Sjc_0001902/Sjc_0007161/Sjc_0004548/Sjc_0009437/Sjc_0008816/Sjc_0002725/Sjc_0007456/Sjc_0005664/Sjc_0001165/Sjc_0001671/Sjc_0005634/Sjc_0001280/Sjc_0007778/Sjc_0003009/Sjc_0000785/Sjc_0009230/Sjc_0005536/Sjc_0007124/Sjc_0005339/Sjc_0002904/Sjc_0001212/Sjc_0006312/Sjc_0008939/Sjc_0003712/Sjc_0002913/Sjc_0002651/Sjc_0006146/Sjc_0005277/Sjc_0000643/Sjc_0001577/Sjc_0005305/Sjc…
GO:0009205	purine ribonucleoside triphosphate metabolic process	166	-0.501261	-2.0334	6.07937e-07	0.000472873	0.000440167	1743	tags=42%, list=20%, signal=34%	Sjc_0007065/Sjc_0003443/Sjc_0001280/Sjc_0000785/Sjc_0005540/Sjc_0003533/Sjc_0005149/Sjc_0008345/Sjc_0005387/Sjc_0003314/Sjc_0003096/Sjc_0001594/Sjc_0005151/Sjc_0009292/Sjc_0004620/Sjc_0009445/Sjc_0002490/Sjc_0003094/Sjc_0004135/Sjc_0009284/Sjc_0002412/Sjc_0007263/Sjc_0000770/Sjc_0008820/Sjc_0007951/Sjc_0007032/Sjc_0001070/Sjc_0007880/Sjc_0004116/Sjc_0005974/Sjc_0009105/Sjc_0003792/Sjc_0003604/Sjc…
GO:0009144	purine nucleoside triphosphate metabolic process	170	-0.498446	-2.02827	9.0429e-07	0.000602903	0.000561204	1743	tags=42%, list=20%, signal=34%	Sjc_0007065/Sjc_0003443/Sjc_0001280/Sjc_0000785/Sjc_0005540/Sjc_0003533/Sjc_0005149/Sjc_0008345/Sjc_0005387/Sjc_0003314/Sjc_0003096/Sjc_0001594/Sjc_0005151/Sjc_0009292/Sjc_0004620/Sjc_0009445/Sjc_0002490/Sjc_0003094/Sjc_0004135/Sjc_0009284/Sjc_0002412/Sjc_0007263/Sjc_0000770/Sjc_0008820/Sjc_0007951/Sjc_0007032/Sjc_0001070/Sjc_0007880/Sjc_0004116/Sjc_0005974/Sjc_0009105/Sjc_0003792/Sjc_0003604/Sjc…
GO:0009141	nucleoside triphosphate metabolic process	192	-0.480475	-1.97524	1.29365e-06	0.000754681	0.000702484	1778	tags=41%, list=20%, signal=34%	Sjc_0003710/Sjc_0007065/Sjc_0003443/Sjc_0001280/Sjc_0000785/Sjc_0005540/Sjc_0002199/Sjc_0003533/Sjc_0005149/Sjc_0008345/Sjc_0005387/Sjc_0003314/Sjc_0003096/Sjc_0001594/Sjc_0005151/Sjc_0009292/Sjc_0004620/Sjc_0003914/Sjc_0009445/Sjc_0002490/Sjc_0003094/Sjc_0004135/Sjc_0009284/Sjc_0002412/Sjc_0007263/Sjc_0000770/Sjc_0008820/Sjc_0007951/Sjc_0007032/Sjc_0001070/Sjc_0007880/Sjc_0004116/Sjc_0005974/Sjc…
GO:0009199	ribonucleoside triphosphate metabolic process	169	-0.489601	-1.99214	2.18203e-06	0.0011315	0.00105324	1743	tags=41%, list=20%, signal=34%	Sjc_0007065/Sjc_0003443/Sjc_0001280/Sjc_0000785/Sjc_0005540/Sjc_0003533/Sjc_0005149/Sjc_0008345/Sjc_0005387/Sjc_0003314/Sjc_0003096/Sjc_0001594/Sjc_0005151/Sjc_0009292/Sjc_0004620/Sjc_0009445/Sjc_0002490/Sjc_0003094/Sjc_0004135/Sjc_0009284/Sjc_0002412/Sjc_0007263/Sjc_0000770/Sjc_0008820/Sjc_0007951/Sjc_0007032/Sjc_0001070/Sjc_0007880/Sjc_0004116/Sjc_0005974/Sjc_0009105/Sjc_0003792/Sjc_0003604/Sjc…
GO:0006605	protein targeting	195	-0.462951	-1.91498	2.77486e-06	0.00129503	0.00120546	1976	tags=41%, list=22%, signal=33%	Sjc_0007964/Sjc_0007299/Sjc_0006131/Sjc_0005464/Sjc_0003159/Sjc_0001062/Sjc_0005348/Sjc_0007456/Sjc_0000816/Sjc_0008774/Sjc_0004094/Sjc_0005536/Sjc_0004061/Sjc_0002146/Sjc_0002913/Sjc_0008345/Sjc_0001254/Sjc_0001577/Sjc_0006763/Sjc_0001240/Sjc_0002490/Sjc_0002978/Sjc_0004910/Sjc_0003508/Sjc_0006699/Sjc_0008250/Sjc_0008960/Sjc_0009429/Sjc_0001274/Sjc_0005700/Sjc_0006359/Sjc_0003692/Sjc_0001070/Sjc…
GO:0022613	ribonucleoprotein complex biogenesis	400	-0.378559	-1.7164	3.44364e-06	0.00146104	0.00135999	2033	tags=32%, list=23%, signal=26%	Sjc_0005265/Sjc_0003171/Sjc_0006947/Sjc_0005301/Sjc_0000385/Sjc_0008746/Sjc_0007133/Sjc_0000881/Sjc_0001479/Sjc_0003373/Sjc_0004735/Sjc_0000310/Sjc_0001062/Sjc_0006984/Sjc_0007161/Sjc_0002599/Sjc_0004788/Sjc_0007456/Sjc_0008499/Sjc_0000559/Sjc_0007007/Sjc_0001415/Sjc_0007778/Sjc_0003523/Sjc_0009230/Sjc_0005536/Sjc_0003089/Sjc_0001212/Sjc_0003709/Sjc_0002932/Sjc_0000369/Sjc_0002913/Sjc_0002651/Sjc…
GO:0009126	purine nucleoside monophosphate metabolic process	178	-0.47692	-1.95181	7.50478e-06	0.00250177	0.00232874	1670	tags=40%, list=19%, signal=33%	Sjc_0001280/Sjc_0000785/Sjc_0005540/Sjc_0003533/Sjc_0005149/Sjc_0008345/Sjc_0005387/Sjc_0003314/Sjc_0003651/Sjc_0003096/Sjc_0001594/Sjc_0005151/Sjc_0009292/Sjc_0004620/Sjc_0009445/Sjc_0002490/Sjc_0003094/Sjc_0004457/Sjc_0004135/Sjc_0009284/Sjc_0006808/Sjc_0002412/Sjc_0007263/Sjc_0000770/Sjc_0008820/Sjc_0007951/Sjc_0007032/Sjc_0001070/Sjc_0004116/Sjc_0005974/Sjc_0000416/Sjc_0009105/Sjc_0003792/Sjc…
GO:0009167	purine ribonucleoside monophosphate metabolic process	178	-0.47692	-1.95181	7.50478e-06	0.00250177	0.00232874	1670	tags=40%, list=19%, signal=33%	Sjc_0001280/Sjc_0000785/Sjc_0005540/Sjc_0003533/Sjc_0005149/Sjc_0008345/Sjc_0005387/Sjc_0003314/Sjc_0003651/Sjc_0003096/Sjc_0001594/Sjc_0005151/Sjc_0009292/Sjc_0004620/Sjc_0009445/Sjc_0002490/Sjc_0003094/Sjc_0004457/Sjc_0004135/Sjc_0009284/Sjc_0006808/Sjc_0002412/Sjc_0007263/Sjc_0000770/Sjc_0008820/Sjc_0007951/Sjc_0007032/Sjc_0001070/Sjc_0004116/Sjc_0005974/Sjc_0000416/Sjc_0009105/Sjc_0003792/Sjc…
GO:0006163	purine nucleotide metabolic process	272	-0.410516	-1.79775	7.48659e-06	0.00250177	0.00232874	1705	tags=35%, list=19%, signal=29%	Sjc_0003443/Sjc_0001236/Sjc_0008162/Sjc_0006235/Sjc_0001280/Sjc_0000785/Sjc_0005540/Sjc_0003533/Sjc_0005149/Sjc_0008345/Sjc_0005387/Sjc_0003314/Sjc_0003651/Sjc_0003096/Sjc_0001594/Sjc_0005151/Sjc_0009292/Sjc_0002773/Sjc_0004620/Sjc_0009445/Sjc_0002490/Sjc_0003115/Sjc_0003094/Sjc_0004457/Sjc_0004135/Sjc_0009284/Sjc_0006808/Sjc_0002412/Sjc_0007263/Sjc_0000770/Sjc_0008820/Sjc_0007951/Sjc_0007032/Sjc…
GO:0045333	cellular respiration	121	-0.518215	-2.00302	1.11325e-05	0.00324721	0.00302262	1657	tags=40%, list=19%, signal=33%	Sjc_0000785/Sjc_0005540/Sjc_0007190/Sjc_0003533/Sjc_0002658/Sjc_0005149/Sjc_0005935/Sjc_0008345/Sjc_0003314/Sjc_0005151/Sjc_0002388/Sjc_0009445/Sjc_0003094/Sjc_0002412/Sjc_0007263/Sjc_0007032/Sjc_0001070/Sjc_0004116/Sjc_0005974/Sjc_0003638/Sjc_0009105/Sjc_0003792/Sjc_0004570/Sjc_0006031/Sjc_0002005/Sjc_0003673/Sjc_0003281/Sjc_0005414/Sjc_0006393/Sjc_0008703/Sjc_0003021/Sjc_0007140/Sjc_0004159/Sjc…
GO:0009150	purine ribonucleotide metabolic process	266	-0.41176	-1.79156	1.05638e-05	0.00324721	0.00302262	1705	tags=35%, list=19%, signal=29%	Sjc_0003443/Sjc_0001236/Sjc_0008162/Sjc_0006235/Sjc_0001280/Sjc_0000785/Sjc_0005540/Sjc_0003533/Sjc_0005149/Sjc_0008345/Sjc_0005387/Sjc_0003314/Sjc_0003651/Sjc_0003096/Sjc_0001594/Sjc_0005151/Sjc_0009292/Sjc_0002773/Sjc_0004620/Sjc_0009445/Sjc_0002490/Sjc_0003115/Sjc_0003094/Sjc_0004457/Sjc_0004135/Sjc_0009284/Sjc_0006808/Sjc_0002412/Sjc_0007263/Sjc_0000770/Sjc_0008820/Sjc_0007951/Sjc_0007032/Sjc…
GO:0070972	protein localization to endoplasmic reticulum	88	-0.572384	-2.09762	1.26888e-05	0.0034114	0.00317545	1672	tags=51%, list=19%, signal=42%	Sjc_0008774/Sjc_0005536/Sjc_0004061/Sjc_0008263/Sjc_0002913/Sjc_0001577/Sjc_0006763/Sjc_0004910/Sjc_0006699/Sjc_0009429/Sjc_0006359/Sjc_0003692/Sjc_0006480/Sjc_0004660/Sjc_0004426/Sjc_0000247/Sjc_0002600/Sjc_0005661/Sjc_0006700/Sjc_0002514/Sjc_0001285/Sjc_0004983/Sjc_0008088/Sjc_0001877/Sjc_0006439/Sjc_0000713/Sjc_0006436/Sjc_0005797/Sjc_0002694/Sjc_0008418/Sjc_0006119/Sjc_0006587/Sjc_0007923/Sjc…
GO:0009259	ribonucleotide metabolic process	275	-0.401288	-1.75603	1.31573e-05	0.0034114	0.00317545	1705	tags=34%, list=19%, signal=28%	Sjc_0003443/Sjc_0001236/Sjc_0008162/Sjc_0006235/Sjc_0001280/Sjc_0000785/Sjc_0005540/Sjc_0003533/Sjc_0005149/Sjc_0008345/Sjc_0005387/Sjc_0003314/Sjc_0003651/Sjc_0003096/Sjc_0001594/Sjc_0005151/Sjc_0009292/Sjc_0002773/Sjc_0004620/Sjc_0009445/Sjc_0002490/Sjc_0003115/Sjc_0003094/Sjc_0004457/Sjc_0004135/Sjc_0009284/Sjc_0006808/Sjc_0002412/Sjc_0007263/Sjc_0000770/Sjc_0008820/Sjc_0007951/Sjc_0007032/Sjc…
GO:0009123	nucleoside monophosphate metabolic process	203	-0.450669	-1.87683	1.49928e-05	0.0036827	0.00342799	1670	tags=39%, list=19%, signal=32%	Sjc_0001280/Sjc_0000785/Sjc_0005540/Sjc_0002199/Sjc_0003533/Sjc_0005149/Sjc_0008345/Sjc_0005387/Sjc_0003314/Sjc_0003651/Sjc_0003096/Sjc_0001594/Sjc_0005151/Sjc_0009292/Sjc_0004620/Sjc_0009445/Sjc_0002490/Sjc_0003094/Sjc_0004457/Sjc_0004135/Sjc_0009284/Sjc_0006808/Sjc_0002412/Sjc_0007263/Sjc_0000770/Sjc_0008820/Sjc_0007951/Sjc_0007032/Sjc_0001070/Sjc_0004116/Sjc_0005974/Sjc_0002313/Sjc_0000416/Sjc…
GO:0009161	ribonucleoside monophosphate metabolic process	188	-0.450413	-1.85195	2.141e-05	0.00499601	0.00465047	1670	tags=39%, list=19%, signal=32%	Sjc_0001280/Sjc_0000785/Sjc_0005540/Sjc_0003533/Sjc_0005149/Sjc_0008345/Sjc_0005387/Sjc_0003314/Sjc_0003651/Sjc_0003096/Sjc_0001594/Sjc_0005151/Sjc_0009292/Sjc_0004620/Sjc_0009445/Sjc_0002490/Sjc_0003094/Sjc_0004457/Sjc_0004135/Sjc_0009284/Sjc_0006808/Sjc_0002412/Sjc_0007263/Sjc_0000770/Sjc_0008820/Sjc_0007951/Sjc_0007032/Sjc_0001070/Sjc_0004116/Sjc_0005974/Sjc_0000416/Sjc_0009105/Sjc_0003792/Sjc…
GO:0019693	ribose phosphate metabolic process	288	-0.401819	-1.75447	2.2559e-05	0.00501348	0.00466672	1705	tags=34%, list=19%, signal=28%	Sjc_0003443/Sjc_0001236/Sjc_0008162/Sjc_0006235/Sjc_0007119/Sjc_0001280/Sjc_0000785/Sjc_0005540/Sjc_0003533/Sjc_0005149/Sjc_0008345/Sjc_0005387/Sjc_0003314/Sjc_0003651/Sjc_0003096/Sjc_0001594/Sjc_0005151/Sjc_0009292/Sjc_0002773/Sjc_0004620/Sjc_0009445/Sjc_0001169/Sjc_0002490/Sjc_0003115/Sjc_0003094/Sjc_0004457/Sjc_0004135/Sjc_0009284/Sjc_0006808/Sjc_0002412/Sjc_0007263/Sjc_0000770/Sjc_0008820/Sjc…
GO:0006612	protein targeting to membrane	109	-0.527737	-2.01216	2.82303e-05	0.00548963	0.00510994	1150	tags=39%, list=13%, signal=34%	Sjc_0008960/Sjc_0009429/Sjc_0001274/Sjc_0006359/Sjc_0006480/Sjc_0003306/Sjc_0004660/Sjc_0002935/Sjc_0004426/Sjc_0008172/Sjc_0000247/Sjc_0002600/Sjc_0008962/Sjc_0005661/Sjc_0009235/Sjc_0006700/Sjc_0002514/Sjc_0001285/Sjc_0004983/Sjc_0008088/Sjc_0009705/Sjc_0008961/Sjc_0006439/Sjc_0000713/Sjc_0006436/Sjc_0005797/Sjc_0002694/Sjc_0008418/Sjc_0006119/Sjc_0009704/Sjc_0007923/Sjc_0001298/Sjc_0008098/Sjc…
GO:0090150	establishment of protein localization to membrane	171	-0.456173	-1.85933	2.7313e-05	0.00548963	0.00510994	1672	tags=35%, list=19%, signal=29%	Sjc_0008774/Sjc_0004094/Sjc_0005536/Sjc_0004061/Sjc_0002494/Sjc_0002913/Sjc_0001577/Sjc_0006763/Sjc_0003634/Sjc_0005342/Sjc_0004910/Sjc_0006699/Sjc_0008250/Sjc_0004137/Sjc_0008960/Sjc_0009429/Sjc_0001274/Sjc_0006359/Sjc_0009260/Sjc_0006480/Sjc_0003306/Sjc_0004660/Sjc_0002935/Sjc_0004426/Sjc_0008172/Sjc_0000247/Sjc_0002600/Sjc_0008962/Sjc_0005661/Sjc_0009235/Sjc_0003185/Sjc_0006700/Sjc_0002514/Sjc…
GO:0009117	nucleotide metabolic process	360	-0.375665	-1.69371	2.63993e-05	0.00548963	0.00510994	1705	tags=31%, list=19%, signal=26%	Sjc_0003443/Sjc_0001236/Sjc_0008162/Sjc_0006235/Sjc_0007119/Sjc_0001280/Sjc_0000785/Sjc_0005540/Sjc_0002199/Sjc_0009242/Sjc_0003533/Sjc_0005149/Sjc_0008345/Sjc_0005387/Sjc_0003314/Sjc_0003651/Sjc_0003096/Sjc_0001594/Sjc_0005151/Sjc_0005500/Sjc_0009292/Sjc_0002773/Sjc_0004620/Sjc_0003914/Sjc_0009445/Sjc_0001169/Sjc_0002490/Sjc_0003115/Sjc_0003094/Sjc_0004457/Sjc_0004135/Sjc_0009284/Sjc_0006808/Sjc…
GO:0009145	purine nucleoside triphosphate biosynthetic process	66	-0.596903	-2.07462	3.14924e-05	0.00565289	0.00526192	1526	tags=45%, list=17%, signal=38%	Sjc_0005387/Sjc_0003314/Sjc_0003096/Sjc_0001594/Sjc_0009292/Sjc_0002490/Sjc_0004135/Sjc_0000770/Sjc_0005974/Sjc_0003792/Sjc_0000303/Sjc_0008801/Sjc_0005478/Sjc_0000468/Sjc_0006670/Sjc_0003673/Sjc_0001512/Sjc_0005424/Sjc_0002845/Sjc_0004045/Sjc_0002491/Sjc_0001904/Sjc_0006511/Sjc_0003515/Sjc_0008545/Sjc_0005564/Sjc_0006464/Sjc_0001593/Sjc_0008892/Sjc_0005423
GO:0009206	purine ribonucleoside triphosphate biosynthetic process	66	-0.596903	-2.07462	3.14924e-05	0.00565289	0.00526192	1526	tags=45%, list=17%, signal=38%	Sjc_0005387/Sjc_0003314/Sjc_0003096/Sjc_0001594/Sjc_0009292/Sjc_0002490/Sjc_0004135/Sjc_0000770/Sjc_0005974/Sjc_0003792/Sjc_0000303/Sjc_0008801/Sjc_0005478/Sjc_0000468/Sjc_0006670/Sjc_0003673/Sjc_0001512/Sjc_0005424/Sjc_0002845/Sjc_0004045/Sjc_0002491/Sjc_0001904/Sjc_0006511/Sjc_0003515/Sjc_0008545/Sjc_0005564/Sjc_0006464/Sjc_0001593/Sjc_0008892/Sjc_0005423
GO:0072594	establishment of protein localization to organelle	264	-0.400559	-1.74421	3.56364e-05	0.00615982	0.00573378	1672	tags=30%, list=19%, signal=25%	Sjc_0008774/Sjc_0003523/Sjc_0004094/Sjc_0005536/Sjc_0004061/Sjc_0007942/Sjc_0005935/Sjc_0002913/Sjc_0008345/Sjc_0001060/Sjc_0001254/Sjc_0001577/Sjc_0006763/Sjc_0003634/Sjc_0001240/Sjc_0006916/Sjc_0002490/Sjc_0002978/Sjc_0004910/Sjc_0003508/Sjc_0003647/Sjc_0002803/Sjc_0006699/Sjc_0003561/Sjc_0008250/Sjc_0009429/Sjc_0004017/Sjc_0005700/Sjc_0006359/Sjc_0003692/Sjc_0006495/Sjc_0001070/Sjc_0003371/Sjc…
GO:0002181	cytoplasmic translation	116	-0.517741	-1.98933	4.42538e-05	0.00737616	0.00686599	1542	tags=53%, list=18%, signal=44%	Sjc_0002913/Sjc_0002651/Sjc_0001577/Sjc_0005305/Sjc_0007144/Sjc_0004910/Sjc_0001696/Sjc_0006699/Sjc_0007523/Sjc_0008365/Sjc_0001052/Sjc_0009429/Sjc_0008927/Sjc_0004749/Sjc_0001046/Sjc_0006243/Sjc_0006359/Sjc_0003950/Sjc_0006480/Sjc_0006472/Sjc_0004660/Sjc_0003183/Sjc_0006770/Sjc_0000036/Sjc_0000247/Sjc_0002600/Sjc_0005661/Sjc_0003585/Sjc_0002514/Sjc_0001802/Sjc_0008088/Sjc_0004562/Sjc_0006276/Sjc…
GO:1901361	organic cyclic compound catabolic process	324	-0.371513	-1.65936	5.27338e-05	0.00847039	0.00788454	1335	tags=26%, list=15%, signal=23%	Sjc_0002490/Sjc_0004910/Sjc_0001696/Sjc_0004457/Sjc_0000168/Sjc_0006699/Sjc_0007896/Sjc_0005572/Sjc_0003791/Sjc_0003038/Sjc_0001052/Sjc_0009429/Sjc_0009284/Sjc_0001866/Sjc_0001219/Sjc_0009131/Sjc_0006359/Sjc_0007880/Sjc_0005974/Sjc_0006480/Sjc_0004660/Sjc_0000303/Sjc_0008801/Sjc_0005478/Sjc_0002817/Sjc_0009060/Sjc_0003673/Sjc_0001512/Sjc_0000247/Sjc_0003103/Sjc_0002843/Sjc_0005962/Sjc_0005424/Sjc…
GO:0006753	nucleoside phosphate metabolic process	366	-0.365657	-1.65157	5.44486e-05	0.00847039	0.00788454	1705	tags=31%, list=19%, signal=26%	Sjc_0003443/Sjc_0001236/Sjc_0008162/Sjc_0006235/Sjc_0007119/Sjc_0001280/Sjc_0000785/Sjc_0005540/Sjc_0002199/Sjc_0009242/Sjc_0003533/Sjc_0005149/Sjc_0008345/Sjc_0005387/Sjc_0003314/Sjc_0003651/Sjc_0003096/Sjc_0001594/Sjc_0005151/Sjc_0005500/Sjc_0009292/Sjc_0002773/Sjc_0004620/Sjc_0003914/Sjc_0009445/Sjc_0001169/Sjc_0002490/Sjc_0003115/Sjc_0003094/Sjc_0004457/Sjc_0004135/Sjc_0009284/Sjc_0006808/Sjc…
GO:0000184	nuclear-transcribed mRNA catabolic process, nonsense-mediated decay	75	-0.5646	-2.01521	5.82095e-05	0.00876334	0.00815723	1321	tags=47%, list=15%, signal=40%	Sjc_0004910/Sjc_0000168/Sjc_0006699/Sjc_0001052/Sjc_0009429/Sjc_0006359/Sjc_0006480/Sjc_0004660/Sjc_0000247/Sjc_0002600/Sjc_0005661/Sjc_0007194/Sjc_0000508/Sjc_0002514/Sjc_0001285/Sjc_0008088/Sjc_0006439/Sjc_0000713/Sjc_0006436/Sjc_0005797/Sjc_0002694/Sjc_0008418/Sjc_0006119/Sjc_0007923/Sjc_0001298/Sjc_0008098/Sjc_0003863/Sjc_0003170/Sjc_0001071/Sjc_0008099/Sjc_0004023/Sjc_0005210/Sjc_0000157/Sjc…
GO:0008380	RNA splicing	309	-0.372495	-1.6512	6.78511e-05	0.00989566	0.00921124	2480	tags=42%, list=28%, signal=31%	Sjc_0002336/Sjc_0008744/Sjc_0001144/Sjc_0007526/Sjc_0004318/Sjc_0008157/Sjc_0003150/Sjc_0003255/Sjc_0007760/Sjc_0001748/Sjc_0002681/Sjc_0004202/Sjc_0001350/Sjc_0004754/Sjc_0001092/Sjc_0003131/Sjc_0001762/Sjc_0002953/Sjc_0007250/Sjc_0002631/Sjc_0000586/Sjc_0002293/Sjc_0007165/Sjc_0000960/Sjc_0009114/Sjc_0007783/Sjc_0002435/Sjc_0007133/Sjc_0000881/Sjc_0001479/Sjc_0003373/Sjc_0001128/Sjc_0007547/Sjc…
GO:0034655	nucleobase-containing compound catabolic process	303	-0.368982	-1.63562	7.72386e-05	0.0106021	0.00986884	1335	tags=27%, list=15%, signal=23%	Sjc_0002490/Sjc_0004910/Sjc_0001696/Sjc_0004457/Sjc_0000168/Sjc_0006699/Sjc_0007896/Sjc_0005572/Sjc_0003791/Sjc_0003038/Sjc_0001052/Sjc_0009429/Sjc_0009284/Sjc_0001866/Sjc_0001219/Sjc_0009131/Sjc_0006359/Sjc_0007880/Sjc_0005974/Sjc_0006480/Sjc_0004660/Sjc_0000303/Sjc_0008801/Sjc_0005478/Sjc_0002817/Sjc_0009060/Sjc_0003673/Sjc_0001512/Sjc_0000247/Sjc_0003103/Sjc_0002843/Sjc_0005962/Sjc_0005424/Sjc…
GO:0055086	nucleobase-containing small molecule metabolic process	438	-0.339622	-1.54945	7.7024e-05	0.0106021	0.00986884	1927	tags=31%, list=22%, signal=26%	Sjc_0001147/Sjc_0005716/Sjc_0002609/Sjc_0006211/Sjc_0007094/Sjc_0004206/Sjc_0001329/Sjc_0008039/Sjc_0008832/Sjc_0000585/Sjc_0003570/Sjc_0003710/Sjc_0007065/Sjc_0003443/Sjc_0001236/Sjc_0008162/Sjc_0006235/Sjc_0007119/Sjc_0001280/Sjc_0005043/Sjc_0000785/Sjc_0005540/Sjc_0002830/Sjc_0002199/Sjc_0002766/Sjc_0009242/Sjc_0003533/Sjc_0006017/Sjc_0005149/Sjc_0008345/Sjc_0005387/Sjc_0003314/Sjc_0003651/Sjc…
GO:1902600	proton transmembrane transport	80	-0.552404	-1.98679	8.3025e-05	0.0110708	0.0103051	1610	tags=51%, list=18%, signal=42%	Sjc_0008726/Sjc_0003533/Sjc_0005387/Sjc_0003314/Sjc_0003096/Sjc_0009292/Sjc_0004620/Sjc_0001590/Sjc_0003094/Sjc_0000770/Sjc_0008820/Sjc_0007951/Sjc_0004664/Sjc_0005299/Sjc_0004116/Sjc_0002996/Sjc_0003792/Sjc_0009118/Sjc_0000468/Sjc_0006670/Sjc_0005515/Sjc_0009120/Sjc_0008547/Sjc_0001790/Sjc_0003281/Sjc_0002845/Sjc_0005874/Sjc_0005289/Sjc_0003764/Sjc_0007207/Sjc_0005896/Sjc_0006511/Sjc_0003419/Sjc…
GO:0072599	establishment of protein localization to endoplasmic reticulum	74	-0.577979	-2.06088	8.97184e-05	0.011631	0.0108265	1672	tags=57%, list=19%, signal=46%	Sjc_0008774/Sjc_0005536/Sjc_0004061/Sjc_0002913/Sjc_0001577/Sjc_0006763/Sjc_0004910/Sjc_0006699/Sjc_0009429/Sjc_0006359/Sjc_0003692/Sjc_0006480/Sjc_0004660/Sjc_0004426/Sjc_0000247/Sjc_0002600/Sjc_0005661/Sjc_0006700/Sjc_0002514/Sjc_0001285/Sjc_0004983/Sjc_0008088/Sjc_0001877/Sjc_0006439/Sjc_0000713/Sjc_0006436/Sjc_0005797/Sjc_0002694/Sjc_0008418/Sjc_0006119/Sjc_0007923/Sjc_0001298/Sjc_0008098/Sjc…
GO:0072521	purine-containing compound metabolic process	310	-0.370033	-1.63867	9.44589e-05	0.0119146	0.0110905	1927	tags=34%, list=22%, signal=28%	Sjc_0001147/Sjc_0002609/Sjc_0006211/Sjc_0007094/Sjc_0001329/Sjc_0008039/Sjc_0008832/Sjc_0000585/Sjc_0007065/Sjc_0003443/Sjc_0001236/Sjc_0008162/Sjc_0006235/Sjc_0001280/Sjc_0000785/Sjc_0005540/Sjc_0003533/Sjc_0005149/Sjc_0008345/Sjc_0005387/Sjc_0003314/Sjc_0003651/Sjc_0003096/Sjc_0001594/Sjc_0005151/Sjc_0009292/Sjc_0002773/Sjc_0004620/Sjc_0009445/Sjc_0002490/Sjc_0003115/Sjc_0003094/Sjc_0004457/Sjc…
GO:0042254	ribosome biogenesis	284	-0.387116	-1.69804	0.000103536	0.0127159	0.0118364	1847	tags=31%, list=21%, signal=25%	Sjc_0001062/Sjc_0006984/Sjc_0002599/Sjc_0004788/Sjc_0007456/Sjc_0008499/Sjc_0007007/Sjc_0001415/Sjc_0003523/Sjc_0009230/Sjc_0005536/Sjc_0003089/Sjc_0001212/Sjc_0003709/Sjc_0002932/Sjc_0002913/Sjc_0002651/Sjc_0005277/Sjc_0001577/Sjc_0004989/Sjc_0000919/Sjc_0007322/Sjc_0004910/Sjc_0003536/Sjc_0000855/Sjc_0006699/Sjc_0007523/Sjc_0007896/Sjc_0008365/Sjc_0009429/Sjc_0008927/Sjc_0004749/Sjc_0000451/Sjc…
GO:0044270	cellular nitrogen compound catabolic process	311	-0.368235	-1.63239	0.000109564	0.0131111	0.0122043	1335	tags=26%, list=15%, signal=23%	Sjc_0002490/Sjc_0004910/Sjc_0001696/Sjc_0004457/Sjc_0000168/Sjc_0006699/Sjc_0007896/Sjc_0005572/Sjc_0003791/Sjc_0003038/Sjc_0001052/Sjc_0009429/Sjc_0009284/Sjc_0001866/Sjc_0001219/Sjc_0009131/Sjc_0006359/Sjc_0007880/Sjc_0005974/Sjc_0006480/Sjc_0004660/Sjc_0000303/Sjc_0008801/Sjc_0005478/Sjc_0002817/Sjc_0009060/Sjc_0003673/Sjc_0001512/Sjc_0000247/Sjc_0003103/Sjc_0002843/Sjc_0005962/Sjc_0005424/Sjc…
GO:0006613	cotranslational protein targeting to membrane	66	-0.57596	-2.00183	0.000118754	0.0138556	0.0128973	1645	tags=58%, list=19%, signal=47%	Sjc_0005536/Sjc_0004061/Sjc_0002913/Sjc_0001577/Sjc_0006763/Sjc_0004910/Sjc_0006699/Sjc_0009429/Sjc_0006359/Sjc_0006480/Sjc_0004660/Sjc_0004426/Sjc_0000247/Sjc_0002600/Sjc_0005661/Sjc_0006700/Sjc_0002514/Sjc_0001285/Sjc_0004983/Sjc_0008088/Sjc_0006439/Sjc_0000713/Sjc_0006436/Sjc_0005797/Sjc_0002694/Sjc_0008418/Sjc_0006119/Sjc_0007923/Sjc_0001298/Sjc_0008098/Sjc_0003863/Sjc_0001071/Sjc_0008099/Sjc…
GO:0006754	ATP biosynthetic process	64	-0.579814	-1.99601	0.000130199	0.0140508	0.0130789	1526	tags=44%, list=17%, signal=36%	Sjc_0005387/Sjc_0003314/Sjc_0003096/Sjc_0009292/Sjc_0002490/Sjc_0004135/Sjc_0000770/Sjc_0005974/Sjc_0003792/Sjc_0000303/Sjc_0008801/Sjc_0005478/Sjc_0000468/Sjc_0006670/Sjc_0003673/Sjc_0001512/Sjc_0005424/Sjc_0002845/Sjc_0004045/Sjc_0002491/Sjc_0001904/Sjc_0006511/Sjc_0003515/Sjc_0008545/Sjc_0005564/Sjc_0006464/Sjc_0001593/Sjc_0005423
GO:0006119	oxidative phosphorylation	89	-0.541595	-1.98595	0.000132469	0.0140508	0.0130789	1743	tags=47%, list=20%, signal=38%	Sjc_0007065/Sjc_0001280/Sjc_0000785/Sjc_0005540/Sjc_0003533/Sjc_0005149/Sjc_0008345/Sjc_0003314/Sjc_0003096/Sjc_0005151/Sjc_0009445/Sjc_0003094/Sjc_0002412/Sjc_0007263/Sjc_0008820/Sjc_0007032/Sjc_0001070/Sjc_0004116/Sjc_0009105/Sjc_0003792/Sjc_0003604/Sjc_0006031/Sjc_0000468/Sjc_0006670/Sjc_0002005/Sjc_0003281/Sjc_0002845/Sjc_0008703/Sjc_0005289/Sjc_0004159/Sjc_0003862/Sjc_0005896/Sjc_0003280/Sjc…
GO:0000377	RNA splicing, via transesterification reactions with bulged adenosine as nucleophile	276	-0.377539	-1.65322	0.000127614	0.0140508	0.0130789	2480	tags=43%, list=28%, signal=32%	Sjc_0002336/Sjc_0008744/Sjc_0001144/Sjc_0007526/Sjc_0004318/Sjc_0008157/Sjc_0003150/Sjc_0007760/Sjc_0001748/Sjc_0002681/Sjc_0004202/Sjc_0001350/Sjc_0001092/Sjc_0003131/Sjc_0001762/Sjc_0007250/Sjc_0002631/Sjc_0000586/Sjc_0002293/Sjc_0007165/Sjc_0000960/Sjc_0009114/Sjc_0002435/Sjc_0007133/Sjc_0000881/Sjc_0001479/Sjc_0003373/Sjc_0001128/Sjc_0007547/Sjc_0000310/Sjc_0001155/Sjc_0003001/Sjc_0007645/Sjc…
GO:0000398	mRNA splicing, via spliceosome	276	-0.377539	-1.65322	0.000127614	0.0140508	0.0130789	2480	tags=43%, list=28%, signal=32%	Sjc_0002336/Sjc_0008744/Sjc_0001144/Sjc_0007526/Sjc_0004318/Sjc_0008157/Sjc_0003150/Sjc_0007760/Sjc_0001748/Sjc_0002681/Sjc_0004202/Sjc_0001350/Sjc_0001092/Sjc_0003131/Sjc_0001762/Sjc_0007250/Sjc_0002631/Sjc_0000586/Sjc_0002293/Sjc_0007165/Sjc_0000960/Sjc_0009114/Sjc_0002435/Sjc_0007133/Sjc_0000881/Sjc_0001479/Sjc_0003373/Sjc_0001128/Sjc_0007547/Sjc_0000310/Sjc_0001155/Sjc_0003001/Sjc_0007645/Sjc…
GO:0051603	proteolysis involved in cellular protein catabolic process	371	-0.350285	-1.58339	0.0001422	0.0147477	0.0137277	1801	tags=28%, list=20%, signal=23%	Sjc_0005254/Sjc_0000997/Sjc_0005340/Sjc_0005246/Sjc_0003644/Sjc_0000172/Sjc_0007774/Sjc_0003148/Sjc_0008774/Sjc_0005536/Sjc_0000227/Sjc_0003996/Sjc_0001017/Sjc_0005887/Sjc_0006949/Sjc_0008263/Sjc_0008321/Sjc_0005935/Sjc_0002277/Sjc_0007687/Sjc_0002578/Sjc_0003386/Sjc_0009025/Sjc_0003931/Sjc_0002835/Sjc_0005465/Sjc_0007144/Sjc_0005677/Sjc_0009374/Sjc_0008728/Sjc_0001779/Sjc_0003454/Sjc_0004514/Sjc…
GO:0016999	antibiotic metabolic process	53	-0.613677	-2.04077	0.000153656	0.0155894	0.0145112	1616	tags=47%, list=18%, signal=39%	Sjc_0007190/Sjc_0002658/Sjc_0005935/Sjc_0002388/Sjc_0009249/Sjc_0009284/Sjc_0007032/Sjc_0008539/Sjc_0005974/Sjc_0004570/Sjc_0003673/Sjc_0005414/Sjc_0006393/Sjc_0003021/Sjc_0000647/Sjc_0005875/Sjc_0007140/Sjc_0001724/Sjc_0003862/Sjc_0001148/Sjc_0007876/Sjc_0005754/Sjc_0000909/Sjc_0008538/Sjc_0005934
GO:0009127	purine nucleoside monophosphate biosynthetic process	74	-0.565356	-2.01587	0.000180323	0.0158877	0.0147888	1526	tags=42%, list=17%, signal=35%	Sjc_0005387/Sjc_0003314/Sjc_0003096/Sjc_0001594/Sjc_0009292/Sjc_0002490/Sjc_0004135/Sjc_0000770/Sjc_0005974/Sjc_0000416/Sjc_0003792/Sjc_0000303/Sjc_0008801/Sjc_0005478/Sjc_0000468/Sjc_0006670/Sjc_0003673/Sjc_0001512/Sjc_0005424/Sjc_0002845/Sjc_0004045/Sjc_0002491/Sjc_0001904/Sjc_0007810/Sjc_0006511/Sjc_0003515/Sjc_0008545/Sjc_0005564/Sjc_0006464/Sjc_0001593/Sjc_0005423
GO:0009168	purine ribonucleoside monophosphate biosynthetic process	74	-0.565356	-2.01587	0.000180323	0.0158877	0.0147888	1526	tags=42%, list=17%, signal=35%	Sjc_0005387/Sjc_0003314/Sjc_0003096/Sjc_0001594/Sjc_0009292/Sjc_0002490/Sjc_0004135/Sjc_0000770/Sjc_0005974/Sjc_0000416/Sjc_0003792/Sjc_0000303/Sjc_0008801/Sjc_0005478/Sjc_0000468/Sjc_0006670/Sjc_0003673/Sjc_0001512/Sjc_0005424/Sjc_0002845/Sjc_0004045/Sjc_0002491/Sjc_0001904/Sjc_0007810/Sjc_0006511/Sjc_0003515/Sjc_0008545/Sjc_0005564/Sjc_0006464/Sjc_0001593/Sjc_0005423
GO:0006614	SRP-dependent cotranslational protein targeting to membrane	62	-0.584073	-1.99054	0.000180425	0.0158877	0.0147888	1645	tags=61%, list=19%, signal=50%	Sjc_0005536/Sjc_0004061/Sjc_0002913/Sjc_0001577/Sjc_0006763/Sjc_0004910/Sjc_0006699/Sjc_0009429/Sjc_0006359/Sjc_0006480/Sjc_0004660/Sjc_0004426/Sjc_0000247/Sjc_0002600/Sjc_0005661/Sjc_0006700/Sjc_0002514/Sjc_0001285/Sjc_0004983/Sjc_0008088/Sjc_0006439/Sjc_0000713/Sjc_0006436/Sjc_0005797/Sjc_0002694/Sjc_0008418/Sjc_0006119/Sjc_0007923/Sjc_0001298/Sjc_0008098/Sjc_0003863/Sjc_0001071/Sjc_0008099/Sjc…
GO:0009156	ribonucleoside monophosphate biosynthetic process	79	-0.549659	-1.97045	0.00016367	0.0158877	0.0147888	1526	tags=39%, list=17%, signal=33%	Sjc_0005387/Sjc_0003314/Sjc_0003096/Sjc_0001594/Sjc_0009292/Sjc_0002490/Sjc_0004135/Sjc_0000770/Sjc_0005974/Sjc_0000416/Sjc_0003792/Sjc_0000303/Sjc_0008801/Sjc_0005478/Sjc_0000468/Sjc_0006670/Sjc_0003673/Sjc_0001512/Sjc_0005424/Sjc_0002845/Sjc_0004045/Sjc_0002491/Sjc_0001904/Sjc_0007810/Sjc_0006511/Sjc_0003515/Sjc_0008545/Sjc_0005564/Sjc_0006464/Sjc_0001593/Sjc_0005423
GO:0009201	ribonucleoside triphosphate biosynthetic process	69	-0.565909	-1.97021	0.000174011	0.0158877	0.0147888	1526	tags=43%, list=17%, signal=36%	Sjc_0005387/Sjc_0003314/Sjc_0003096/Sjc_0001594/Sjc_0009292/Sjc_0002490/Sjc_0004135/Sjc_0000770/Sjc_0005974/Sjc_0003792/Sjc_0000303/Sjc_0008801/Sjc_0005478/Sjc_0000468/Sjc_0006670/Sjc_0003673/Sjc_0001512/Sjc_0005424/Sjc_0002845/Sjc_0004045/Sjc_0002491/Sjc_0001904/Sjc_0006511/Sjc_0003515/Sjc_0008545/Sjc_0005564/Sjc_0006464/Sjc_0001593/Sjc_0008892/Sjc_0005423
GO:0009124	nucleoside monophosphate biosynthetic process	81	-0.544196	-1.95511	0.000177554	0.0158877	0.0147888	1526	tags=40%, list=17%, signal=33%	Sjc_0005387/Sjc_0003314/Sjc_0003096/Sjc_0001594/Sjc_0009292/Sjc_0002490/Sjc_0004135/Sjc_0000770/Sjc_0005974/Sjc_0000416/Sjc_0003792/Sjc_0000303/Sjc_0008801/Sjc_0005478/Sjc_0000468/Sjc_0006670/Sjc_0003673/Sjc_0001512/Sjc_0005424/Sjc_0002845/Sjc_0004045/Sjc_0002491/Sjc_0001904/Sjc_0001759/Sjc_0007810/Sjc_0006511/Sjc_0003515/Sjc_0008545/Sjc_0005564/Sjc_0006464/Sjc_0001593/Sjc_0005423
GO:0000375	RNA splicing, via transesterification reactions	277	-0.377334	-1.65129	0.000164742	0.0158877	0.0147888	2480	tags=43%, list=28%, signal=32%	Sjc_0002336/Sjc_0008744/Sjc_0001144/Sjc_0007526/Sjc_0004318/Sjc_0008157/Sjc_0003150/Sjc_0007760/Sjc_0001748/Sjc_0002681/Sjc_0004202/Sjc_0001350/Sjc_0001092/Sjc_0003131/Sjc_0001762/Sjc_0007250/Sjc_0002631/Sjc_0000586/Sjc_0002293/Sjc_0007165/Sjc_0000960/Sjc_0009114/Sjc_0002435/Sjc_0007133/Sjc_0000881/Sjc_0001479/Sjc_0003373/Sjc_0001128/Sjc_0007547/Sjc_0000310/Sjc_0001155/Sjc_0003001/Sjc_0007645/Sjc…
GO:0044257	cellular protein catabolic process	399	-0.347567	-1.57446	0.000184407	0.0159376	0.0148352	1801	tags=28%, list=20%, signal=23%	Sjc_0005254/Sjc_0000997/Sjc_0005340/Sjc_0005246/Sjc_0003644/Sjc_0000172/Sjc_0000816/Sjc_0006101/Sjc_0007774/Sjc_0001685/Sjc_0003148/Sjc_0008774/Sjc_0005536/Sjc_0000227/Sjc_0003996/Sjc_0001017/Sjc_0005887/Sjc_0006949/Sjc_0008263/Sjc_0008321/Sjc_0005935/Sjc_0002277/Sjc_0007687/Sjc_0002578/Sjc_0003386/Sjc_0009025/Sjc_0003931/Sjc_0002835/Sjc_0005465/Sjc_0007144/Sjc_0005677/Sjc_0009374/Sjc_0008728/Sjc…
GO:0045047	protein targeting to ER	70	-0.57377	-2.01075	0.000194472	0.0159973	0.0148909	1672	tags=57%, list=19%, signal=47%	Sjc_0008774/Sjc_0005536/Sjc_0004061/Sjc_0002913/Sjc_0001577/Sjc_0006763/Sjc_0004910/Sjc_0006699/Sjc_0009429/Sjc_0006359/Sjc_0003692/Sjc_0006480/Sjc_0004660/Sjc_0004426/Sjc_0000247/Sjc_0002600/Sjc_0005661/Sjc_0006700/Sjc_0002514/Sjc_0001285/Sjc_0004983/Sjc_0008088/Sjc_0006439/Sjc_0000713/Sjc_0006436/Sjc_0005797/Sjc_0002694/Sjc_0008418/Sjc_0006119/Sjc_0007923/Sjc_0001298/Sjc_0008098/Sjc_0003863/Sjc…
GO:0015985	energy coupled proton transport, down electrochemical gradient	18	-0.758535	-2.00405	0.000200124	0.0159973	0.0148909	1927	tags=83%, list=22%, signal=65%	Sjc_0001147/Sjc_0008039/Sjc_0005387/Sjc_0003314/Sjc_0003096/Sjc_0009292/Sjc_0000770/Sjc_0003792/Sjc_0000468/Sjc_0006670/Sjc_0002845/Sjc_0006511/Sjc_0008545/Sjc_0005564/Sjc_0001593
GO:0015986	proton motive force-driven ATP synthesis	18	-0.758535	-2.00405	0.000200124	0.0159973	0.0148909	1927	tags=83%, list=22%, signal=65%	Sjc_0001147/Sjc_0008039/Sjc_0005387/Sjc_0003314/Sjc_0003096/Sjc_0009292/Sjc_0000770/Sjc_0003792/Sjc_0000468/Sjc_0006670/Sjc_0002845/Sjc_0006511/Sjc_0008545/Sjc_0005564/Sjc_0001593
GO:0016053	organic acid biosynthetic process	132	-0.465417	-1.82026	0.000205665	0.0159973	0.0148909	2092	tags=38%, list=24%, signal=29%	Sjc_0001605/Sjc_0004909/Sjc_0009229/Sjc_0004740/Sjc_0008550/Sjc_0002609/Sjc_0001329/Sjc_0009112/Sjc_0001236/Sjc_0006235/Sjc_0000785/Sjc_0007942/Sjc_0003061/Sjc_0002856/Sjc_0007290/Sjc_0002773/Sjc_0004916/Sjc_0002490/Sjc_0001901/Sjc_0006577/Sjc_0009284/Sjc_0007821/Sjc_0004471/Sjc_0004929/Sjc_0005974/Sjc_0009110/Sjc_0000303/Sjc_0008801/Sjc_0005478/Sjc_0003673/Sjc_0001512/Sjc_0000388/Sjc_0006221/Sjc…
GO:0046394	carboxylic acid biosynthetic process	132	-0.465417	-1.82026	0.000205665	0.0159973	0.0148909	2092	tags=38%, list=24%, signal=29%	Sjc_0001605/Sjc_0004909/Sjc_0009229/Sjc_0004740/Sjc_0008550/Sjc_0002609/Sjc_0001329/Sjc_0009112/Sjc_0001236/Sjc_0006235/Sjc_0000785/Sjc_0007942/Sjc_0003061/Sjc_0002856/Sjc_0007290/Sjc_0002773/Sjc_0004916/Sjc_0002490/Sjc_0001901/Sjc_0006577/Sjc_0009284/Sjc_0007821/Sjc_0004471/Sjc_0004929/Sjc_0005974/Sjc_0009110/Sjc_0000303/Sjc_0008801/Sjc_0005478/Sjc_0003673/Sjc_0001512/Sjc_0000388/Sjc_0006221/Sjc…
GO:0046700	heterocycle catabolic process	312	-0.367013	-1.6284	0.000204854	0.0159973	0.0148909	1335	tags=26%, list=15%, signal=23%	Sjc_0002490/Sjc_0004910/Sjc_0001696/Sjc_0004457/Sjc_0000168/Sjc_0006699/Sjc_0007896/Sjc_0005572/Sjc_0003791/Sjc_0003038/Sjc_0001052/Sjc_0009429/Sjc_0009284/Sjc_0001866/Sjc_0001219/Sjc_0009131/Sjc_0006359/Sjc_0007880/Sjc_0005974/Sjc_0006480/Sjc_0004660/Sjc_0000303/Sjc_0008801/Sjc_0005478/Sjc_0002817/Sjc_0009060/Sjc_0003673/Sjc_0001512/Sjc_0000247/Sjc_0003103/Sjc_0002843/Sjc_0005962/Sjc_0005424/Sjc…
GO:0002274	myeloid leukocyte activation	212	-0.40062	-1.6675	0.000215015	0.0164504	0.0153126	2092	tags=39%, list=24%, signal=31%	Sjc_0001605/Sjc_0006541/Sjc_0007087/Sjc_0007454/Sjc_0009415/Sjc_0008920/Sjc_0007299/Sjc_0004740/Sjc_0003769/Sjc_0004534/Sjc_0003286/Sjc_0004651/Sjc_0004985/Sjc_0001325/Sjc_0004568/Sjc_0003159/Sjc_0008832/Sjc_0003001/Sjc_0009112/Sjc_0008077/Sjc_0005246/Sjc_0000172/Sjc_0000816/Sjc_0001680/Sjc_0001293/Sjc_0001280/Sjc_0003727/Sjc_0007942/Sjc_0006934/Sjc_0007202/Sjc_0008074/Sjc_0007167/Sjc_0006194/Sjc…
GO:0002446	neutrophil mediated immunity	195	-0.414153	-1.71313	0.000252052	0.0187439	0.0174474	2092	tags=42%, list=24%, signal=32%	Sjc_0001605/Sjc_0006541/Sjc_0007087/Sjc_0007454/Sjc_0009415/Sjc_0008920/Sjc_0007299/Sjc_0004740/Sjc_0003769/Sjc_0004534/Sjc_0003286/Sjc_0004651/Sjc_0004985/Sjc_0001325/Sjc_0004568/Sjc_0003159/Sjc_0008832/Sjc_0003001/Sjc_0009112/Sjc_0008077/Sjc_0005246/Sjc_0000172/Sjc_0000816/Sjc_0001680/Sjc_0001293/Sjc_0001280/Sjc_0003727/Sjc_0007942/Sjc_0006934/Sjc_0008074/Sjc_0007167/Sjc_0004657/Sjc_0007991/Sjc…
GO:0033365	protein localization to organelle	481	-0.32334	-1.48929	0.000253024	0.0187439	0.0174474	1922	tags=28%, list=22%, signal=23%	Sjc_0003122/Sjc_0006131/Sjc_0005464/Sjc_0001754/Sjc_0000732/Sjc_0001176/Sjc_0002503/Sjc_0003744/Sjc_0005348/Sjc_0004425/Sjc_0002599/Sjc_0007456/Sjc_0004133/Sjc_0000816/Sjc_0006101/Sjc_0002664/Sjc_0003148/Sjc_0008774/Sjc_0003523/Sjc_0004094/Sjc_0005536/Sjc_0004061/Sjc_0007942/Sjc_0008263/Sjc_0005935/Sjc_0002913/Sjc_0008345/Sjc_0001060/Sjc_0009452/Sjc_0001254/Sjc_0001577/Sjc_0001320/Sjc_0006763/Sjc…
GO:0006164	purine nucleotide biosynthetic process	120	-0.467879	-1.8106	0.000266854	0.0191601	0.0178349	1526	tags=34%, list=17%, signal=29%	Sjc_0005387/Sjc_0003314/Sjc_0003096/Sjc_0001594/Sjc_0009292/Sjc_0002773/Sjc_0002490/Sjc_0003115/Sjc_0004135/Sjc_0000770/Sjc_0007032/Sjc_0002485/Sjc_0005974/Sjc_0000416/Sjc_0003792/Sjc_0009110/Sjc_0000303/Sjc_0008801/Sjc_0005478/Sjc_0000468/Sjc_0006670/Sjc_0003673/Sjc_0001512/Sjc_0005414/Sjc_0005424/Sjc_0002845/Sjc_0004045/Sjc_0003021/Sjc_0002491/Sjc_0001904/Sjc_0001979/Sjc_0003114/Sjc_0007810/Sjc…
GO:0019439	aromatic compound catabolic process	314	-0.361155	-1.60338	0.000266191	0.0191601	0.0178349	1335	tags=26%, list=15%, signal=23%	Sjc_0002490/Sjc_0004910/Sjc_0001696/Sjc_0004457/Sjc_0000168/Sjc_0006699/Sjc_0007896/Sjc_0005572/Sjc_0003791/Sjc_0003038/Sjc_0001052/Sjc_0009429/Sjc_0009284/Sjc_0001866/Sjc_0001219/Sjc_0009131/Sjc_0006359/Sjc_0007880/Sjc_0005974/Sjc_0006480/Sjc_0004660/Sjc_0000303/Sjc_0008801/Sjc_0005478/Sjc_0002817/Sjc_0009060/Sjc_0003673/Sjc_0001512/Sjc_0000247/Sjc_0003103/Sjc_0002843/Sjc_0005962/Sjc_0005424/Sjc…
GO:0043312	neutrophil degranulation	188	-0.414905	-1.70595	0.000299067	0.0211477	0.019685	2092	tags=42%, list=24%, signal=33%	Sjc_0001605/Sjc_0006541/Sjc_0007087/Sjc_0007454/Sjc_0009415/Sjc_0008920/Sjc_0007299/Sjc_0004740/Sjc_0003769/Sjc_0004534/Sjc_0003286/Sjc_0004651/Sjc_0004985/Sjc_0001325/Sjc_0004568/Sjc_0003159/Sjc_0008832/Sjc_0003001/Sjc_0009112/Sjc_0008077/Sjc_0005246/Sjc_0000172/Sjc_0000816/Sjc_0001680/Sjc_0001293/Sjc_0001280/Sjc_0003727/Sjc_0007942/Sjc_0006934/Sjc_0008074/Sjc_0007167/Sjc_0007991/Sjc_0001594/Sjc…
GO:0019058	viral life cycle	97	-0.494067	-1.83374	0.000308306	0.0214756	0.0199903	2636	tags=46%, list=30%, signal=33%	Sjc_0004791/Sjc_0001472/Sjc_0008990/Sjc_0004990/Sjc_0001702/Sjc_0003677/Sjc_0000273/Sjc_0008955/Sjc_0008731/Sjc_0001750/Sjc_0001063/Sjc_0003915/Sjc_0005361/Sjc_0004202/Sjc_0008409/Sjc_0008920/Sjc_0003769/Sjc_0003001/Sjc_0005113/Sjc_0007161/Sjc_0008449/Sjc_0000816/Sjc_0006101/Sjc_0008774/Sjc_0007778/Sjc_0006194/Sjc_0007144/Sjc_0005428/Sjc_0006499/Sjc_0006099/Sjc_0006710/Sjc_0001137/Sjc_0002538/Sjc…
GO:0009142	nucleoside triphosphate biosynthetic process	85	-0.520554	-1.88167	0.000330542	0.0226858	0.0211168	1526	tags=41%, list=17%, signal=34%	Sjc_0002199/Sjc_0005387/Sjc_0003314/Sjc_0003096/Sjc_0001594/Sjc_0009292/Sjc_0002490/Sjc_0004135/Sjc_0000770/Sjc_0005974/Sjc_0002313/Sjc_0003792/Sjc_0006862/Sjc_0000303/Sjc_0008801/Sjc_0005478/Sjc_0000468/Sjc_0006670/Sjc_0003673/Sjc_0001512/Sjc_0007528/Sjc_0005424/Sjc_0002845/Sjc_0002198/Sjc_0004045/Sjc_0002491/Sjc_0001904/Sjc_0006511/Sjc_0003515/Sjc_0008545/Sjc_0005564/Sjc_0006464/Sjc_0001593/Sjc…
GO:0002283	neutrophil activation involved in immune response	189	-0.414347	-1.70529	0.00033987	0.022988	0.0213981	2092	tags=42%, list=24%, signal=33%	Sjc_0001605/Sjc_0006541/Sjc_0007087/Sjc_0007454/Sjc_0009415/Sjc_0008920/Sjc_0007299/Sjc_0004740/Sjc_0003769/Sjc_0004534/Sjc_0003286/Sjc_0004651/Sjc_0004985/Sjc_0001325/Sjc_0004568/Sjc_0003159/Sjc_0008832/Sjc_0003001/Sjc_0009112/Sjc_0008077/Sjc_0005246/Sjc_0000172/Sjc_0000816/Sjc_0001680/Sjc_0001293/Sjc_0001280/Sjc_0003727/Sjc_0007942/Sjc_0006934/Sjc_0008074/Sjc_0007167/Sjc_0007991/Sjc_0001594/Sjc…
GO:0071868	cellular response to monoamine stimulus	24	-0.704728	-1.99126	0.00035505	0.0230142	0.0214224	960	tags=42%, list=11%, signal=37%	Sjc_0002997/Sjc_0000303/Sjc_0005424/Sjc_0005238/Sjc_0001877/Sjc_0006237/Sjc_0001878/Sjc_0005423/Sjc_0000190/Sjc_0000189
GO:0071869	response to catecholamine	24	-0.704728	-1.99126	0.00035505	0.0230142	0.0214224	960	tags=42%, list=11%, signal=37%	Sjc_0002997/Sjc_0000303/Sjc_0005424/Sjc_0005238/Sjc_0001877/Sjc_0006237/Sjc_0001878/Sjc_0005423/Sjc_0000190/Sjc_0000189
GO:0071870	cellular response to catecholamine stimulus	24	-0.704728	-1.99126	0.00035505	0.0230142	0.0214224	960	tags=42%, list=11%, signal=37%	Sjc_0002997/Sjc_0000303/Sjc_0005424/Sjc_0005238/Sjc_0001877/Sjc_0006237/Sjc_0001878/Sjc_0005423/Sjc_0000190/Sjc_0000189
GO:0071826	ribonucleoprotein complex subunit organization	184	-0.421317	-1.7342	0.00036324	0.0232225	0.0216163	2284	tags=40%, list=26%, signal=30%	Sjc_0001350/Sjc_0005993/Sjc_0001092/Sjc_0003131/Sjc_0006685/Sjc_0003440/Sjc_0007165/Sjc_0009114/Sjc_0003841/Sjc_0007087/Sjc_0003171/Sjc_0005301/Sjc_0008746/Sjc_0007133/Sjc_0000881/Sjc_0001479/Sjc_0003373/Sjc_0000310/Sjc_0007161/Sjc_0002599/Sjc_0004788/Sjc_0000559/Sjc_0007778/Sjc_0003523/Sjc_0000369/Sjc_0002913/Sjc_0002651/Sjc_0006146/Sjc_0001592/Sjc_0001577/Sjc_0000919/Sjc_0001696/Sjc_0003536/Sjc…
GO:0006457	protein folding	113	-0.469395	-1.80313	0.000396392	0.0249995	0.0232704	1646	tags=38%, list=19%, signal=31%	Sjc_0004771/Sjc_0008550/Sjc_0005716/Sjc_0005242/Sjc_0004094/Sjc_0005339/Sjc_0003996/Sjc_0001060/Sjc_0007687/Sjc_0004059/Sjc_0005085/Sjc_0001240/Sjc_0006916/Sjc_0006132/Sjc_0006899/Sjc_0005082/Sjc_0000519/Sjc_0000225/Sjc_0002859/Sjc_0004427/Sjc_0005700/Sjc_0001358/Sjc_0006495/Sjc_0002997/Sjc_0005157/Sjc_0004114/Sjc_0006931/Sjc_0004078/Sjc_0002005/Sjc_0009146/Sjc_0000823/Sjc_0000927/Sjc_0004074/Sjc…
GO:0098662	inorganic cation transmembrane transport	287	-0.362862	-1.58798	0.000440013	0.0273806	0.0254868	1612	tags=29%, list=18%, signal=25%	Sjc_0001555/Sjc_0001548/Sjc_0008726/Sjc_0001318/Sjc_0003533/Sjc_0006623/Sjc_0005149/Sjc_0005387/Sjc_0003314/Sjc_0003096/Sjc_0005072/Sjc_0007144/Sjc_0009292/Sjc_0004620/Sjc_0001169/Sjc_0001590/Sjc_0005456/Sjc_0003801/Sjc_0003094/Sjc_0005006/Sjc_0003647/Sjc_0007047/Sjc_0000749/Sjc_0004471/Sjc_0000770/Sjc_0003836/Sjc_0008820/Sjc_0007951/Sjc_0009770/Sjc_0004664/Sjc_0005299/Sjc_0001070/Sjc_0004116/Sjc…
GO:0009152	purine ribonucleotide biosynthetic process	114	-0.466458	-1.78989	0.000460674	0.028289	0.0263324	1526	tags=35%, list=17%, signal=29%	Sjc_0005387/Sjc_0003314/Sjc_0003096/Sjc_0001594/Sjc_0009292/Sjc_0002773/Sjc_0002490/Sjc_0003115/Sjc_0004135/Sjc_0000770/Sjc_0007032/Sjc_0002485/Sjc_0005974/Sjc_0000416/Sjc_0003792/Sjc_0009110/Sjc_0000303/Sjc_0008801/Sjc_0005478/Sjc_0000468/Sjc_0006670/Sjc_0003673/Sjc_0001512/Sjc_0005414/Sjc_0005424/Sjc_0002845/Sjc_0004045/Sjc_0003021/Sjc_0002491/Sjc_0001904/Sjc_0003114/Sjc_0007810/Sjc_0006511/Sjc…
GO:0006887	exocytosis	346	-0.343889	-1.53841	0.000483262	0.0292907	0.0272648	2632	tags=45%, list=30%, signal=33%	Sjc_0001927/Sjc_0006999/Sjc_0003502/Sjc_0001637/Sjc_0009031/Sjc_0000644/Sjc_0008158/Sjc_0000338/Sjc_0001817/Sjc_0005786/Sjc_0003677/Sjc_0007770/Sjc_0008847/Sjc_0000273/Sjc_0006780/Sjc_0007300/Sjc_0001834/Sjc_0009457/Sjc_0003042/Sjc_0006927/Sjc_0008905/Sjc_0006617/Sjc_0005019/Sjc_0005361/Sjc_0000639/Sjc_0002417/Sjc_0004202/Sjc_0003943/Sjc_0001653/Sjc_0002746/Sjc_0000754/Sjc_0003095/Sjc_0008062/Sjc…
GO:0042119	neutrophil activation	191	-0.410965	-1.68999	0.000507206	0.0295892	0.0275426	2092	tags=41%, list=24%, signal=32%	Sjc_0001605/Sjc_0006541/Sjc_0007087/Sjc_0007454/Sjc_0009415/Sjc_0008920/Sjc_0007299/Sjc_0004740/Sjc_0003769/Sjc_0004534/Sjc_0003286/Sjc_0004651/Sjc_0004985/Sjc_0001325/Sjc_0004568/Sjc_0003159/Sjc_0008832/Sjc_0003001/Sjc_0009112/Sjc_0008077/Sjc_0005246/Sjc_0000172/Sjc_0000816/Sjc_0001680/Sjc_0001293/Sjc_0001280/Sjc_0003727/Sjc_0007942/Sjc_0006934/Sjc_0008074/Sjc_0007167/Sjc_0007991/Sjc_0001594/Sjc…
GO:0043299	leukocyte degranulation	199	-0.403975	-1.68226	0.000497163	0.0295892	0.0275426	2092	tags=40%, list=24%, signal=31%	Sjc_0001605/Sjc_0006541/Sjc_0007087/Sjc_0007454/Sjc_0009415/Sjc_0008920/Sjc_0007299/Sjc_0004740/Sjc_0003769/Sjc_0004534/Sjc_0003286/Sjc_0004651/Sjc_0004985/Sjc_0001325/Sjc_0004568/Sjc_0003159/Sjc_0008832/Sjc_0003001/Sjc_0009112/Sjc_0008077/Sjc_0005246/Sjc_0000172/Sjc_0000816/Sjc_0001680/Sjc_0001293/Sjc_0001280/Sjc_0003727/Sjc_0007942/Sjc_0006934/Sjc_0001318/Sjc_0008074/Sjc_0007167/Sjc_0007991/Sjc…
GO:0002275	myeloid cell activation involved in immune response	198	-0.402026	-1.6742	0.000505282	0.0295892	0.0275426	2092	tags=40%, list=24%, signal=31%	Sjc_0001605/Sjc_0006541/Sjc_0007087/Sjc_0007454/Sjc_0009415/Sjc_0008920/Sjc_0007299/Sjc_0004740/Sjc_0003769/Sjc_0004534/Sjc_0003286/Sjc_0004651/Sjc_0004985/Sjc_0001325/Sjc_0004568/Sjc_0003159/Sjc_0008832/Sjc_0003001/Sjc_0009112/Sjc_0008077/Sjc_0005246/Sjc_0000172/Sjc_0000816/Sjc_0001680/Sjc_0001293/Sjc_0001280/Sjc_0003727/Sjc_0007942/Sjc_0006934/Sjc_0008074/Sjc_0007167/Sjc_0007991/Sjc_0001594/Sjc…
GO:0048878	chemical homeostasis	448	-0.318824	-1.45415	0.000536211	0.030895	0.0287582	1860	tags=27%, list=21%, signal=22%	Sjc_0003147/Sjc_0002842/Sjc_0003744/Sjc_0007013/Sjc_0002955/Sjc_0009217/Sjc_0008077/Sjc_0002583/Sjc_0000412/Sjc_0006878/Sjc_0000816/Sjc_0008787/Sjc_0001236/Sjc_0006235/Sjc_0003938/Sjc_0003523/Sjc_0006116/Sjc_0002191/Sjc_0001555/Sjc_0001548/Sjc_0007202/Sjc_0001318/Sjc_0006623/Sjc_0005149/Sjc_0005935/Sjc_0002468/Sjc_0008074/Sjc_0006194/Sjc_0009409/Sjc_0007991/Sjc_0005072/Sjc_0007290/Sjc_0002388/Sjc…
GO:0006413	translational initiation	115	-0.474709	-1.82377	0.00056245	0.031626	0.0294386	1339	tags=35%, list=15%, signal=30%	Sjc_0000811/Sjc_0004910/Sjc_0006699/Sjc_0008084/Sjc_0009429/Sjc_0006359/Sjc_0000575/Sjc_0004105/Sjc_0006480/Sjc_0004660/Sjc_0003183/Sjc_0006770/Sjc_0001137/Sjc_0000247/Sjc_0002600/Sjc_0005661/Sjc_0002514/Sjc_0001285/Sjc_0008088/Sjc_0006439/Sjc_0000713/Sjc_0006436/Sjc_0001000/Sjc_0005797/Sjc_0002694/Sjc_0008418/Sjc_0006119/Sjc_0007923/Sjc_0001298/Sjc_0008098/Sjc_0003863/Sjc_0001905/Sjc_0001071/Sjc…
GO:0072522	purine-containing compound biosynthetic process	122	-0.465474	-1.79892	0.000558229	0.031626	0.0294386	1526	tags=34%, list=17%, signal=28%	Sjc_0005387/Sjc_0003314/Sjc_0003096/Sjc_0001594/Sjc_0009292/Sjc_0002773/Sjc_0002490/Sjc_0003115/Sjc_0004135/Sjc_0000770/Sjc_0007032/Sjc_0002485/Sjc_0005974/Sjc_0000416/Sjc_0003792/Sjc_0009110/Sjc_0000303/Sjc_0008801/Sjc_0005478/Sjc_0000468/Sjc_0006670/Sjc_0003673/Sjc_0001512/Sjc_0005414/Sjc_0005424/Sjc_0002845/Sjc_0004045/Sjc_0003021/Sjc_0002491/Sjc_0001904/Sjc_0001979/Sjc_0003114/Sjc_0007810/Sjc…
GO:0042773	ATP synthesis coupled electron transport	60	-0.561232	-1.90967	0.000599429	0.0317641	0.0295672	1743	tags=52%, list=20%, signal=42%	Sjc_0007065/Sjc_0005540/Sjc_0003533/Sjc_0008345/Sjc_0003314/Sjc_0005151/Sjc_0009445/Sjc_0003094/Sjc_0002412/Sjc_0007263/Sjc_0007032/Sjc_0001070/Sjc_0004116/Sjc_0009105/Sjc_0003792/Sjc_0006031/Sjc_0002005/Sjc_0003281/Sjc_0008703/Sjc_0004159/Sjc_0003862/Sjc_0005896/Sjc_0003280/Sjc_0003419/Sjc_0006635/Sjc_0003043/Sjc_0001151/Sjc_0000909/Sjc_0002632/Sjc_0003139/Sjc_0005280
GO:0042775	mitochondrial ATP synthesis coupled electron transport	60	-0.561232	-1.90967	0.000599429	0.0317641	0.0295672	1743	tags=52%, list=20%, signal=42%	Sjc_0007065/Sjc_0005540/Sjc_0003533/Sjc_0008345/Sjc_0003314/Sjc_0005151/Sjc_0009445/Sjc_0003094/Sjc_0002412/Sjc_0007263/Sjc_0007032/Sjc_0001070/Sjc_0004116/Sjc_0009105/Sjc_0003792/Sjc_0006031/Sjc_0002005/Sjc_0003281/Sjc_0008703/Sjc_0004159/Sjc_0003862/Sjc_0005896/Sjc_0003280/Sjc_0003419/Sjc_0006635/Sjc_0003043/Sjc_0001151/Sjc_0000909/Sjc_0002632/Sjc_0003139/Sjc_0005280
GO:0046390	ribose phosphate biosynthetic process	127	-0.450674	-1.75893	0.000605744	0.0317641	0.0295672	1526	tags=34%, list=17%, signal=28%	Sjc_0005387/Sjc_0003314/Sjc_0003096/Sjc_0001594/Sjc_0009292/Sjc_0002773/Sjc_0001169/Sjc_0002490/Sjc_0003115/Sjc_0004135/Sjc_0000770/Sjc_0007032/Sjc_0002485/Sjc_0005974/Sjc_0003810/Sjc_0000416/Sjc_0000560/Sjc_0003792/Sjc_0009110/Sjc_0000303/Sjc_0008801/Sjc_0005478/Sjc_0000468/Sjc_0006670/Sjc_0003673/Sjc_0001512/Sjc_0005414/Sjc_0005424/Sjc_0002845/Sjc_0004045/Sjc_0003021/Sjc_0002491/Sjc_0001904/Sjc…
GO:0036230	granulocyte activation	192	-0.409534	-1.6836	0.000587646	0.0317641	0.0295672	2092	tags=41%, list=24%, signal=32%	Sjc_0001605/Sjc_0006541/Sjc_0007087/Sjc_0007454/Sjc_0009415/Sjc_0008920/Sjc_0007299/Sjc_0004740/Sjc_0003769/Sjc_0004534/Sjc_0003286/Sjc_0004651/Sjc_0004985/Sjc_0001325/Sjc_0004568/Sjc_0003159/Sjc_0008832/Sjc_0003001/Sjc_0009112/Sjc_0008077/Sjc_0005246/Sjc_0000172/Sjc_0000816/Sjc_0001680/Sjc_0001293/Sjc_0001280/Sjc_0003727/Sjc_0007942/Sjc_0006934/Sjc_0008074/Sjc_0007167/Sjc_0007991/Sjc_0001594/Sjc…
GO:0002263	cell activation involved in immune response	232	-0.381447	-1.62185	0.000592178	0.0317641	0.0295672	2092	tags=38%, list=24%, signal=29%	Sjc_0001605/Sjc_0006541/Sjc_0007087/Sjc_0007454/Sjc_0009415/Sjc_0008920/Sjc_0007299/Sjc_0004740/Sjc_0003769/Sjc_0004534/Sjc_0003286/Sjc_0004651/Sjc_0004985/Sjc_0001325/Sjc_0004568/Sjc_0003159/Sjc_0008832/Sjc_0003001/Sjc_0009112/Sjc_0008077/Sjc_0005246/Sjc_0000172/Sjc_0000816/Sjc_0001680/Sjc_0001293/Sjc_0001280/Sjc_0003727/Sjc_0007942/Sjc_0006934/Sjc_0001318/Sjc_0008074/Sjc_0007167/Sjc_0007991/Sjc…
GO:0030163	protein catabolic process	472	-0.318407	-1.46128	0.000575791	0.0317641	0.0295672	1801	tags=27%, list=20%, signal=23%	Sjc_0005254/Sjc_0000997/Sjc_0005340/Sjc_0005246/Sjc_0003644/Sjc_0000172/Sjc_0000816/Sjc_0009315/Sjc_0006101/Sjc_0007774/Sjc_0001685/Sjc_0003148/Sjc_0008774/Sjc_0005536/Sjc_0000227/Sjc_0003996/Sjc_0001017/Sjc_0005887/Sjc_0006949/Sjc_0008263/Sjc_0008321/Sjc_0005935/Sjc_0002277/Sjc_0007687/Sjc_0002578/Sjc_0003386/Sjc_0009025/Sjc_0003931/Sjc_0002835/Sjc_0005465/Sjc_0007144/Sjc_0005677/Sjc_0009374/Sjc…
GO:0072657	protein localization to membrane	321	-0.347697	-1.55131	0.000618012	0.0320473	0.0298308	1757	tags=27%, list=20%, signal=23%	Sjc_0007456/Sjc_0005242/Sjc_0006101/Sjc_0001685/Sjc_0008774/Sjc_0004094/Sjc_0005536/Sjc_0003996/Sjc_0004061/Sjc_0002494/Sjc_0005935/Sjc_0002131/Sjc_0002913/Sjc_0003651/Sjc_0001577/Sjc_0001320/Sjc_0006763/Sjc_0006597/Sjc_0003634/Sjc_0005342/Sjc_0002978/Sjc_0004910/Sjc_0006761/Sjc_0005006/Sjc_0006699/Sjc_0008250/Sjc_0009488/Sjc_0004137/Sjc_0008960/Sjc_0009429/Sjc_0001274/Sjc_0006808/Sjc_0003590/Sjc…
GO:0002444	myeloid leukocyte mediated immunity	203	-0.404049	-1.68268	0.000637443	0.0323364	0.0300999	2092	tags=40%, list=24%, signal=31%	Sjc_0001605/Sjc_0006541/Sjc_0007087/Sjc_0007454/Sjc_0009415/Sjc_0008920/Sjc_0007299/Sjc_0004740/Sjc_0003769/Sjc_0004534/Sjc_0003286/Sjc_0004651/Sjc_0004985/Sjc_0001325/Sjc_0004568/Sjc_0003159/Sjc_0008832/Sjc_0003001/Sjc_0009112/Sjc_0008077/Sjc_0005246/Sjc_0000172/Sjc_0000816/Sjc_0001680/Sjc_0001293/Sjc_0001280/Sjc_0003727/Sjc_0007942/Sjc_0006934/Sjc_0008074/Sjc_0007167/Sjc_0004657/Sjc_0007991/Sjc…
GO:0006511	ubiquitin-dependent protein catabolic process	311	-0.34719	-1.5391	0.000635602	0.0323364	0.0300999	1801	tags=27%, list=20%, signal=23%	Sjc_0005254/Sjc_0000997/Sjc_0005340/Sjc_0005246/Sjc_0003644/Sjc_0000172/Sjc_0003148/Sjc_0008774/Sjc_0005536/Sjc_0000227/Sjc_0003996/Sjc_0001017/Sjc_0005887/Sjc_0006949/Sjc_0008263/Sjc_0008321/Sjc_0005935/Sjc_0007687/Sjc_0002578/Sjc_0003386/Sjc_0009025/Sjc_0003931/Sjc_0002835/Sjc_0005465/Sjc_0005677/Sjc_0009374/Sjc_0008728/Sjc_0003454/Sjc_0004514/Sjc_0009010/Sjc_0008461/Sjc_0001372/Sjc_0005082/Sjc…
GO:0000956	nuclear-transcribed mRNA catabolic process	139	-0.44401	-1.74543	0.00068315	0.0342824	0.0319113	1321	tags=38%, list=15%, signal=33%	Sjc_0004735/Sjc_0007547/Sjc_0007645/Sjc_0007161/Sjc_0007456/Sjc_0007778/Sjc_0005536/Sjc_0002661/Sjc_0002913/Sjc_0002651/Sjc_0001577/Sjc_0004910/Sjc_0000168/Sjc_0006699/Sjc_0007896/Sjc_0001052/Sjc_0009429/Sjc_0006359/Sjc_0006480/Sjc_0004660/Sjc_0000247/Sjc_0005962/Sjc_0002600/Sjc_0005661/Sjc_0005111/Sjc_0007194/Sjc_0000854/Sjc_0000508/Sjc_0002514/Sjc_0001285/Sjc_0008088/Sjc_0006439/Sjc_0000713/Sjc…
GO:0002366	leukocyte activation involved in immune response	231	-0.382228	-1.623	0.000736677	0.0365753	0.0340456	2092	tags=38%, list=24%, signal=29%	Sjc_0001605/Sjc_0006541/Sjc_0007087/Sjc_0007454/Sjc_0009415/Sjc_0008920/Sjc_0007299/Sjc_0004740/Sjc_0003769/Sjc_0004534/Sjc_0003286/Sjc_0004651/Sjc_0004985/Sjc_0001325/Sjc_0004568/Sjc_0003159/Sjc_0008832/Sjc_0003001/Sjc_0009112/Sjc_0008077/Sjc_0005246/Sjc_0000172/Sjc_0000816/Sjc_0001680/Sjc_0001293/Sjc_0001280/Sjc_0003727/Sjc_0007942/Sjc_0006934/Sjc_0001318/Sjc_0008074/Sjc_0007167/Sjc_0007991/Sjc…
GO:0086019	cell-cell signaling involved in cardiac conduction	16	-0.785597	-2.01751	0.000754226	0.0370523	0.0344896	700	tags=50%, list=8%, signal=46%	Sjc_0005238/Sjc_0005810/Sjc_0000256/Sjc_0001877/Sjc_0001878/Sjc_0008804/Sjc_0000190/Sjc_0000189
GO:0022904	respiratory electron transport chain	68	-0.542992	-1.89462	0.000771868	0.037524	0.0349287	1743	tags=49%, list=20%, signal=39%	Sjc_0007065/Sjc_0005540/Sjc_0003533/Sjc_0008345/Sjc_0003314/Sjc_0005151/Sjc_0002388/Sjc_0009445/Sjc_0003094/Sjc_0002412/Sjc_0007263/Sjc_0007032/Sjc_0001070/Sjc_0004116/Sjc_0009105/Sjc_0003792/Sjc_0006031/Sjc_0002005/Sjc_0003673/Sjc_0003281/Sjc_0008703/Sjc_0004159/Sjc_0003862/Sjc_0005896/Sjc_0003280/Sjc_0003419/Sjc_0006635/Sjc_0003043/Sjc_0001151/Sjc_0000909/Sjc_0002632/Sjc_0003139/Sjc_0005280
GO:0019752	carboxylic acid metabolic process	380	-0.324457	-1.47015	0.000820783	0.0394906	0.0367593	2096	tags=30%, list=24%, signal=24%	Sjc_0008252/Sjc_0001605/Sjc_0008795/Sjc_0007057/Sjc_0004909/Sjc_0009229/Sjc_0005452/Sjc_0005455/Sjc_0003060/Sjc_0004740/Sjc_0001241/Sjc_0003987/Sjc_0008550/Sjc_0006508/Sjc_0002609/Sjc_0007738/Sjc_0001329/Sjc_0004548/Sjc_0009437/Sjc_0001937/Sjc_0009112/Sjc_0001671/Sjc_0003443/Sjc_0001236/Sjc_0002981/Sjc_0005634/Sjc_0001293/Sjc_0006235/Sjc_0007119/Sjc_0000785/Sjc_0008793/Sjc_0007124/Sjc_0007942/Sjc…
GO:0019725	cellular homeostasis	376	-0.33035	-1.49798	0.000902354	0.0429723	0.0400002	2174	tags=35%, list=25%, signal=28%	Sjc_0009232/Sjc_0005336/Sjc_0000402/Sjc_0005261/Sjc_0002672/Sjc_0003967/Sjc_0007543/Sjc_0000533/Sjc_0008111/Sjc_0009475/Sjc_0006041/Sjc_0005455/Sjc_0008920/Sjc_0001964/Sjc_0003783/Sjc_0007424/Sjc_0001329/Sjc_0006114/Sjc_0003147/Sjc_0003570/Sjc_0003744/Sjc_0007013/Sjc_0002955/Sjc_0009217/Sjc_0002583/Sjc_0000412/Sjc_0006259/Sjc_0000816/Sjc_0001680/Sjc_0009315/Sjc_0008787/Sjc_0001236/Sjc_0006235/Sjc…
GO:0098660	inorganic ion transmembrane transport	309	-0.339537	-1.5051	0.000948102	0.0446948	0.0416036	1612	tags=28%, list=18%, signal=23%	Sjc_0001555/Sjc_0001548/Sjc_0008726/Sjc_0001318/Sjc_0003533/Sjc_0006623/Sjc_0005149/Sjc_0005387/Sjc_0003314/Sjc_0003096/Sjc_0005072/Sjc_0007144/Sjc_0009292/Sjc_0004620/Sjc_0001169/Sjc_0001590/Sjc_0005456/Sjc_0003801/Sjc_0003094/Sjc_0005006/Sjc_0003647/Sjc_0007335/Sjc_0007047/Sjc_0000749/Sjc_0004471/Sjc_0000770/Sjc_0003836/Sjc_0008820/Sjc_0007951/Sjc_0009770/Sjc_0004664/Sjc_0005299/Sjc_0001070/Sjc…
GO:0002443	leukocyte mediated immunity	241	-0.370047	-1.5777	0.00100891	0.0470857	0.0438291	2092	tags=36%, list=24%, signal=28%	Sjc_0001605/Sjc_0006541/Sjc_0007087/Sjc_0007454/Sjc_0009415/Sjc_0008920/Sjc_0007299/Sjc_0004740/Sjc_0003769/Sjc_0004534/Sjc_0003286/Sjc_0004651/Sjc_0004985/Sjc_0001325/Sjc_0004568/Sjc_0003159/Sjc_0008832/Sjc_0003001/Sjc_0000997/Sjc_0009112/Sjc_0008077/Sjc_0005246/Sjc_0000172/Sjc_0000816/Sjc_0001680/Sjc_0001293/Sjc_0001280/Sjc_0003727/Sjc_0007942/Sjc_0006934/Sjc_0005051/Sjc_0001318/Sjc_0008074/Sjc…
GO:0019941	modification-dependent protein catabolic process	314	-0.342203	-1.51924	0.00102051	0.0471558	0.0438943	1801	tags=27%, list=20%, signal=22%	Sjc_0005254/Sjc_0000997/Sjc_0005340/Sjc_0005246/Sjc_0003644/Sjc_0000172/Sjc_0003148/Sjc_0008774/Sjc_0005536/Sjc_0000227/Sjc_0003996/Sjc_0001017/Sjc_0005887/Sjc_0006949/Sjc_0008263/Sjc_0008321/Sjc_0005935/Sjc_0007687/Sjc_0002578/Sjc_0003386/Sjc_0009025/Sjc_0003931/Sjc_0002835/Sjc_0005465/Sjc_0005677/Sjc_0009374/Sjc_0008728/Sjc_0003454/Sjc_0004514/Sjc_0009010/Sjc_0008461/Sjc_0001372/Sjc_0005082/Sjc…
GO:0045055	regulated exocytosis	299	-0.345084	-1.5222	0.00103367	0.0472955	0.0440244	2632	tags=46%, list=30%, signal=34%	Sjc_0001927/Sjc_0006999/Sjc_0003502/Sjc_0001637/Sjc_0009031/Sjc_0000644/Sjc_0008158/Sjc_0000338/Sjc_0001817/Sjc_0005786/Sjc_0007770/Sjc_0008847/Sjc_0000273/Sjc_0006780/Sjc_0007300/Sjc_0001834/Sjc_0009457/Sjc_0003042/Sjc_0008905/Sjc_0006617/Sjc_0005019/Sjc_0000639/Sjc_0002417/Sjc_0004202/Sjc_0003943/Sjc_0002746/Sjc_0000754/Sjc_0003095/Sjc_0004352/Sjc_0009232/Sjc_0001008/Sjc_0006142/Sjc_0003621/Sjc…
GO:0006007	glucose catabolic process	16	-0.776027	-1.99293	0.00104389	0.0472994	0.044028	1136	tags=69%, list=13%, signal=60%	Sjc_0009284/Sjc_0001934/Sjc_0005974/Sjc_0000303/Sjc_0008801/Sjc_0005478/Sjc_0001512/Sjc_0005424/Sjc_0004045/Sjc_0001904/Sjc_0005423
GO:0009060	aerobic respiration	53	-0.562292	-1.86989	0.00109282	0.047954	0.0446373	1657	tags=49%, list=19%, signal=40%	Sjc_0000785/Sjc_0007190/Sjc_0002658/Sjc_0005935/Sjc_0008345/Sjc_0003314/Sjc_0007032/Sjc_0001070/Sjc_0005974/Sjc_0003638/Sjc_0003792/Sjc_0004570/Sjc_0003281/Sjc_0005414/Sjc_0006393/Sjc_0003021/Sjc_0007140/Sjc_0001724/Sjc_0003862/Sjc_0005896/Sjc_0003515/Sjc_0003419/Sjc_0007876/Sjc_0003043/Sjc_0000909/Sjc_0005934
GO:0022900	electron transport chain	95	-0.481982	-1.78419	0.00110971	0.047954	0.0446373	1773	tags=42%, list=20%, signal=34%	Sjc_0009112/Sjc_0007065/Sjc_0002981/Sjc_0005540/Sjc_0002830/Sjc_0003533/Sjc_0008345/Sjc_0005387/Sjc_0003314/Sjc_0005151/Sjc_0002388/Sjc_0009445/Sjc_0003094/Sjc_0009249/Sjc_0003364/Sjc_0002412/Sjc_0007263/Sjc_0007032/Sjc_0001070/Sjc_0004116/Sjc_0009105/Sjc_0003792/Sjc_0006031/Sjc_0002005/Sjc_0003673/Sjc_0003281/Sjc_0008703/Sjc_0007228/Sjc_0004159/Sjc_0003862/Sjc_0005896/Sjc_0003280/Sjc_0003419/Sjc…
GO:0019362	pyridine nucleotide metabolic process	82	-0.488343	-1.75813	0.00109144	0.047954	0.0446373	1344	tags=32%, list=15%, signal=27%	Sjc_0001169/Sjc_0002490/Sjc_0003115/Sjc_0009284/Sjc_0007032/Sjc_0005974/Sjc_0000560/Sjc_0000303/Sjc_0008801/Sjc_0005478/Sjc_0003673/Sjc_0001512/Sjc_0005414/Sjc_0005424/Sjc_0006393/Sjc_0004045/Sjc_0003021/Sjc_0002491/Sjc_0001904/Sjc_0000647/Sjc_0001724/Sjc_0003114/Sjc_0003515/Sjc_0006464/Sjc_0001632/Sjc_0005423
GO:0046496	nicotinamide nucleotide metabolic process	82	-0.488343	-1.75813	0.00109144	0.047954	0.0446373	1344	tags=32%, list=15%, signal=27%	Sjc_0001169/Sjc_0002490/Sjc_0003115/Sjc_0009284/Sjc_0007032/Sjc_0005974/Sjc_0000560/Sjc_0000303/Sjc_0008801/Sjc_0005478/Sjc_0003673/Sjc_0001512/Sjc_0005414/Sjc_0005424/Sjc_0006393/Sjc_0004045/Sjc_0003021/Sjc_0002491/Sjc_0001904/Sjc_0000647/Sjc_0001724/Sjc_0003114/Sjc_0003515/Sjc_0006464/Sjc_0001632/Sjc_0005423
GO:0050801	ion homeostasis	292	-0.351097	-1.53871	0.00109989	0.047954	0.0446373	2138	tags=33%, list=24%, signal=25%	Sjc_0005261/Sjc_0003967/Sjc_0007543/Sjc_0004278/Sjc_0008111/Sjc_0008278/Sjc_0006041/Sjc_0005455/Sjc_0008920/Sjc_0003783/Sjc_0007424/Sjc_0001329/Sjc_0003147/Sjc_0003744/Sjc_0007013/Sjc_0002583/Sjc_0006878/Sjc_0000816/Sjc_0008787/Sjc_0001236/Sjc_0006235/Sjc_0003938/Sjc_0006116/Sjc_0001555/Sjc_0001548/Sjc_0001318/Sjc_0006623/Sjc_0005149/Sjc_0002468/Sjc_0005072/Sjc_0007290/Sjc_0002388/Sjc_0004620/Sjc…
GO:0022618	ribonucleoprotein complex assembly	174	-0.418723	-1.71142	0.00121277	0.0519266	0.0483351	2284	tags=40%, list=26%, signal=30%	Sjc_0001350/Sjc_0005993/Sjc_0003131/Sjc_0006685/Sjc_0003440/Sjc_0007165/Sjc_0009114/Sjc_0007087/Sjc_0003171/Sjc_0008746/Sjc_0007133/Sjc_0000881/Sjc_0001479/Sjc_0003373/Sjc_0000310/Sjc_0007161/Sjc_0002599/Sjc_0004788/Sjc_0000559/Sjc_0007778/Sjc_0003523/Sjc_0000369/Sjc_0002913/Sjc_0002651/Sjc_0006146/Sjc_0001592/Sjc_0001577/Sjc_0000919/Sjc_0001696/Sjc_0003536/Sjc_0006699/Sjc_0007272/Sjc_0007349/Sjc…
GO:0009166	nucleotide catabolic process	66	-0.517218	-1.79766	0.00122962	0.0521695	0.0485613	1335	tags=33%, list=15%, signal=28%	Sjc_0002490/Sjc_0004457/Sjc_0009284/Sjc_0001219/Sjc_0007880/Sjc_0005974/Sjc_0000303/Sjc_0008801/Sjc_0005478/Sjc_0003673/Sjc_0001512/Sjc_0002843/Sjc_0005424/Sjc_0004045/Sjc_0002491/Sjc_0001904/Sjc_0001979/Sjc_0001759/Sjc_0002731/Sjc_0003515/Sjc_0006464/Sjc_0005423
GO:0086091	regulation of heart rate by cardiac conduction	14	-0.751196	-1.87253	0.00129805	0.0545765	0.0508018	1092	tags=43%, list=12%, signal=38%	Sjc_0000749/Sjc_0000748/Sjc_0005238/Sjc_0008804/Sjc_0000190/Sjc_0000189
GO:0016032	viral process	171	-0.400422	-1.63209	0.00138073	0.0575346	0.0535553	2731	tags=42%, list=31%, signal=30%	Sjc_0006139/Sjc_0006566/Sjc_0008912/Sjc_0006751/Sjc_0003897/Sjc_0006158/Sjc_0004791/Sjc_0001472/Sjc_0008990/Sjc_0004990/Sjc_0001702/Sjc_0003677/Sjc_0000273/Sjc_0008955/Sjc_0008731/Sjc_0001750/Sjc_0001063/Sjc_0004924/Sjc_0004334/Sjc_0003915/Sjc_0005361/Sjc_0004202/Sjc_0008409/Sjc_0009191/Sjc_0004377/Sjc_0002941/Sjc_0008920/Sjc_0003769/Sjc_0001406/Sjc_0003001/Sjc_0005113/Sjc_0007161/Sjc_0008449/Sjc…
GO:0006120	mitochondrial electron transport, NADH to ubiquinone	32	-0.626108	-1.89873	0.00153436	0.0628394	0.0584932	1432	tags=53%, list=16%, signal=45%	Sjc_0005540/Sjc_0005151/Sjc_0009445/Sjc_0003094/Sjc_0002412/Sjc_0007263/Sjc_0007032/Sjc_0004116/Sjc_0009105/Sjc_0006031/Sjc_0002005/Sjc_0008703/Sjc_0003280/Sjc_0006635/Sjc_0001151/Sjc_0002632/Sjc_0005280
GO:0014074	response to purine-containing compound	78	-0.507478	-1.81312	0.00153497	0.0628394	0.0584932	1468	tags=35%, list=17%, signal=29%	Sjc_0009409/Sjc_0005072/Sjc_0002490/Sjc_0005082/Sjc_0009488/Sjc_0009284/Sjc_0005700/Sjc_0006480/Sjc_0003810/Sjc_0001396/Sjc_0000303/Sjc_0003673/Sjc_0005424/Sjc_0005238/Sjc_0004045/Sjc_0002491/Sjc_0008280/Sjc_0002621/Sjc_0001877/Sjc_0002622/Sjc_0004023/Sjc_0001878/Sjc_0008892/Sjc_0005423/Sjc_0009411/Sjc_0000190/Sjc_0000189
GO:0044283	small molecule biosynthetic process	294	-0.346702	-1.52084	0.00162836	0.0660831	0.0615125	1700	tags=24%, list=19%, signal=20%	Sjc_0001236/Sjc_0004633/Sjc_0008162/Sjc_0006235/Sjc_0007119/Sjc_0000785/Sjc_0007942/Sjc_0006182/Sjc_0003061/Sjc_0001594/Sjc_0002856/Sjc_0007290/Sjc_0005151/Sjc_0002773/Sjc_0004916/Sjc_0001169/Sjc_0002490/Sjc_0003094/Sjc_0004457/Sjc_0001901/Sjc_0006577/Sjc_0000563/Sjc_0009284/Sjc_0007821/Sjc_0001219/Sjc_0004471/Sjc_0004929/Sjc_0007880/Sjc_0004116/Sjc_0005974/Sjc_0000560/Sjc_0009110/Sjc_0000303/Sjc…
GO:0006734	NADH metabolic process	26	-0.687939	-1.99958	0.00173814	0.0699301	0.0650935	1136	tags=54%, list=13%, signal=47%	Sjc_0009284/Sjc_0005974/Sjc_0000303/Sjc_0008801/Sjc_0005478/Sjc_0003673/Sjc_0001512/Sjc_0005424/Sjc_0006393/Sjc_0004045/Sjc_0001904/Sjc_0001724/Sjc_0003515/Sjc_0005423
GO:0006954	inflammatory response	132	-0.420031	-1.64276	0.00177617	0.0708495	0.0659492	1623	tags=30%, list=18%, signal=25%	Sjc_0002199/Sjc_0007942/Sjc_0007202/Sjc_0006194/Sjc_0003386/Sjc_0002437/Sjc_0005072/Sjc_0001696/Sjc_0007343/Sjc_0000033/Sjc_0008960/Sjc_0003038/Sjc_0001313/Sjc_0005700/Sjc_0006686/Sjc_0002313/Sjc_0003306/Sjc_0002935/Sjc_0003246/Sjc_0005238/Sjc_0005231/Sjc_0008962/Sjc_0002198/Sjc_0008991/Sjc_0000623/Sjc_0001979/Sjc_0002015/Sjc_0009705/Sjc_0008961/Sjc_0007462/Sjc_0009704/Sjc_0000272/Sjc_0009285/Sjc…
GO:0071867	response to monoamine	25	-0.683459	-1.95136	0.001817	0.0711198	0.0662009	960	tags=40%, list=11%, signal=36%	Sjc_0002997/Sjc_0000303/Sjc_0005424/Sjc_0005238/Sjc_0001877/Sjc_0006237/Sjc_0001878/Sjc_0005423/Sjc_0000190/Sjc_0000189
GO:0009260	ribonucleotide biosynthetic process	122	-0.440949	-1.70414	0.00180582	0.0711198	0.0662009	1526	tags=33%, list=17%, signal=27%	Sjc_0005387/Sjc_0003314/Sjc_0003096/Sjc_0001594/Sjc_0009292/Sjc_0002773/Sjc_0002490/Sjc_0003115/Sjc_0004135/Sjc_0000770/Sjc_0007032/Sjc_0002485/Sjc_0005974/Sjc_0000416/Sjc_0003792/Sjc_0009110/Sjc_0000303/Sjc_0008801/Sjc_0005478/Sjc_0000468/Sjc_0006670/Sjc_0003673/Sjc_0001512/Sjc_0005414/Sjc_0005424/Sjc_0002845/Sjc_0004045/Sjc_0003021/Sjc_0002491/Sjc_0001904/Sjc_0003114/Sjc_0007810/Sjc_0006511/Sjc…
GO:0016485	protein processing	96	-0.454943	-1.69444	0.0018439	0.0711198	0.0662009	1895	tags=43%, list=22%, signal=34%	Sjc_0001610/Sjc_0003838/Sjc_0007744/Sjc_0003511/Sjc_0004985/Sjc_0003147/Sjc_0006937/Sjc_0009443/Sjc_0006101/Sjc_0001612/Sjc_0001084/Sjc_0002191/Sjc_0008345/Sjc_0006146/Sjc_0001254/Sjc_0003931/Sjc_0007144/Sjc_0003454/Sjc_0007387/Sjc_0008555/Sjc_0000033/Sjc_0004663/Sjc_0001313/Sjc_0003692/Sjc_0001070/Sjc_0003371/Sjc_0006099/Sjc_0004987/Sjc_0006710/Sjc_0002656/Sjc_0005478/Sjc_0000468/Sjc_0003246/Sjc…
GO:0043632	modification-dependent macromolecule catabolic process	323	-0.337418	-1.50619	0.00184205	0.0711198	0.0662009	1801	tags=27%, list=20%, signal=22%	Sjc_0005254/Sjc_0000997/Sjc_0005340/Sjc_0005246/Sjc_0003644/Sjc_0000172/Sjc_0003148/Sjc_0008774/Sjc_0005536/Sjc_0000227/Sjc_0003996/Sjc_0001017/Sjc_0005887/Sjc_0006949/Sjc_0008263/Sjc_0008321/Sjc_0005935/Sjc_0007687/Sjc_0002578/Sjc_0003386/Sjc_0009025/Sjc_0003931/Sjc_0002835/Sjc_0005465/Sjc_0005677/Sjc_0009374/Sjc_0008728/Sjc_0003454/Sjc_0004514/Sjc_0009010/Sjc_0008461/Sjc_0001372/Sjc_0005082/Sjc…
GO:0072330	monocarboxylic acid biosynthetic process	89	-0.481407	-1.76525	0.00186911	0.0715009	0.0665556	1436	tags=30%, list=16%, signal=26%	Sjc_0002856/Sjc_0002773/Sjc_0002490/Sjc_0001901/Sjc_0006577/Sjc_0009284/Sjc_0004471/Sjc_0004929/Sjc_0005974/Sjc_0009110/Sjc_0000303/Sjc_0008801/Sjc_0005478/Sjc_0003673/Sjc_0001512/Sjc_0006221/Sjc_0005424/Sjc_0004045/Sjc_0002491/Sjc_0007728/Sjc_0001904/Sjc_0008018/Sjc_0001389/Sjc_0006464/Sjc_0006587/Sjc_0005423/Sjc_0001388
GO:0006090	pyruvate metabolic process	53	-0.543306	-1.80675	0.00194385	0.0737556	0.0686544	1335	tags=49%, list=15%, signal=42%	Sjc_0001605/Sjc_0003060/Sjc_0001329/Sjc_0001236/Sjc_0002658/Sjc_0002490/Sjc_0003115/Sjc_0009249/Sjc_0009488/Sjc_0009284/Sjc_0007032/Sjc_0005974/Sjc_0000303/Sjc_0008801/Sjc_0005478/Sjc_0003673/Sjc_0001512/Sjc_0005414/Sjc_0005424/Sjc_0004045/Sjc_0003021/Sjc_0002491/Sjc_0001904/Sjc_0003114/Sjc_0006464/Sjc_0005423
GO:0044419	biological process involved in interspecies interaction between organisms	206	-0.368259	-1.52959	0.00199151	0.0749547	0.0697705	2734	tags=42%, list=31%, signal=29%	Sjc_0003871/Sjc_0006139/Sjc_0006566/Sjc_0008912/Sjc_0006751/Sjc_0003897/Sjc_0006158/Sjc_0004791/Sjc_0001472/Sjc_0008990/Sjc_0004990/Sjc_0001702/Sjc_0003677/Sjc_0000273/Sjc_0008955/Sjc_0008731/Sjc_0001750/Sjc_0001063/Sjc_0004924/Sjc_0004334/Sjc_0003915/Sjc_0008785/Sjc_0005361/Sjc_0004202/Sjc_0008409/Sjc_0009191/Sjc_0004377/Sjc_0002941/Sjc_0008920/Sjc_0003769/Sjc_0001406/Sjc_0003001/Sjc_0005113/Sjc…
GO:0046683	response to organophosphorus	69	-0.514211	-1.79022	0.00206331	0.0770357	0.0717076	1468	tags=36%, list=17%, signal=30%	Sjc_0009409/Sjc_0005072/Sjc_0005082/Sjc_0009488/Sjc_0009284/Sjc_0005700/Sjc_0006480/Sjc_0003810/Sjc_0001396/Sjc_0000303/Sjc_0003673/Sjc_0005424/Sjc_0005238/Sjc_0004045/Sjc_0008280/Sjc_0002621/Sjc_0001877/Sjc_0002622/Sjc_0004023/Sjc_0001878/Sjc_0008892/Sjc_0005423/Sjc_0009411/Sjc_0000190/Sjc_0000189
GO:0006096	glycolytic process	33	-0.594078	-1.81957	0.00228891	0.0834558	0.0776837	971	tags=39%, list=11%, signal=35%	Sjc_0002490/Sjc_0005974/Sjc_0000303/Sjc_0008801/Sjc_0005478/Sjc_0003673/Sjc_0001512/Sjc_0005424/Sjc_0004045/Sjc_0002491/Sjc_0001904/Sjc_0006464/Sjc_0005423
GO:0042866	pyruvate biosynthetic process	33	-0.594078	-1.81957	0.00228891	0.0834558	0.0776837	971	tags=39%, list=11%, signal=35%	Sjc_0002490/Sjc_0005974/Sjc_0000303/Sjc_0008801/Sjc_0005478/Sjc_0003673/Sjc_0001512/Sjc_0005424/Sjc_0004045/Sjc_0002491/Sjc_0001904/Sjc_0006464/Sjc_0005423
GO:0050792	regulation of viral process	68	-0.516439	-1.80197	0.00227317	0.0834558	0.0776837	1838	tags=38%, list=21%, signal=30%	Sjc_0003001/Sjc_0008449/Sjc_0008077/Sjc_0000816/Sjc_0008774/Sjc_0007778/Sjc_0003013/Sjc_0008074/Sjc_0006194/Sjc_0007991/Sjc_0007144/Sjc_0001696/Sjc_0006453/Sjc_0005428/Sjc_0006499/Sjc_0009284/Sjc_0006710/Sjc_0001137/Sjc_0008973/Sjc_0003767/Sjc_0006700/Sjc_0003515/Sjc_0003432/Sjc_0006112/Sjc_0003431/Sjc_0008906
GO:0051591	response to cAMP	56	-0.515484	-1.72725	0.00231795	0.0838593	0.0780593	1221	tags=34%, list=14%, signal=29%	Sjc_0009488/Sjc_0009284/Sjc_0006480/Sjc_0003810/Sjc_0001396/Sjc_0000303/Sjc_0003673/Sjc_0005424/Sjc_0005238/Sjc_0004045/Sjc_0008280/Sjc_0002621/Sjc_0002622/Sjc_0004023/Sjc_0008892/Sjc_0005423/Sjc_0009411/Sjc_0000190/Sjc_0000189
GO:1901661	quinone metabolic process	22	-0.700624	-1.9431	0.00234141	0.0840565	0.0782428	1602	tags=50%, list=18%, signal=41%	Sjc_0006182/Sjc_0005151/Sjc_0003094/Sjc_0000563/Sjc_0004116/Sjc_0006635/Sjc_0001389/Sjc_0001151/Sjc_0002632/Sjc_0003139/Sjc_0001388
GO:0002252	immune effector process	378	-0.315226	-1.42474	0.00240115	0.0855432	0.0796267	2095	tags=31%, list=24%, signal=25%	Sjc_0005398/Sjc_0001605/Sjc_0006541/Sjc_0007087/Sjc_0007454/Sjc_0009415/Sjc_0008920/Sjc_0007299/Sjc_0004740/Sjc_0003654/Sjc_0003783/Sjc_0003769/Sjc_0004534/Sjc_0003286/Sjc_0003122/Sjc_0004651/Sjc_0004985/Sjc_0001325/Sjc_0004568/Sjc_0003159/Sjc_0008832/Sjc_0003001/Sjc_0007161/Sjc_0000997/Sjc_0009112/Sjc_0008077/Sjc_0005246/Sjc_0000172/Sjc_0000816/Sjc_0001680/Sjc_0000559/Sjc_0001293/Sjc_0001280/Sjc…
GO:0043903	regulation of biological process involved in symbiotic interaction	80	-0.475476	-1.71011	0.00247737	0.0875899	0.0815318	1838	tags=38%, list=21%, signal=30%	Sjc_0003001/Sjc_0008449/Sjc_0008077/Sjc_0000816/Sjc_0001293/Sjc_0008774/Sjc_0007778/Sjc_0003013/Sjc_0008074/Sjc_0006194/Sjc_0007991/Sjc_0007144/Sjc_0001696/Sjc_0006453/Sjc_0002803/Sjc_0005428/Sjc_0006499/Sjc_0009284/Sjc_0003590/Sjc_0006710/Sjc_0001137/Sjc_0001512/Sjc_0008973/Sjc_0003767/Sjc_0006700/Sjc_0003515/Sjc_0003432/Sjc_0006112/Sjc_0003431/Sjc_0008906
GO:0006099	tricarboxylic acid cycle	33	-0.58975	-1.80631	0.00255819	0.0897674	0.0835587	1616	tags=67%, list=18%, signal=55%	Sjc_0003888/Sjc_0000431/Sjc_0007686/Sjc_0004726/Sjc_0000077/Sjc_0002161/Sjc_0003060/Sjc_0007190/Sjc_0002658/Sjc_0005935/Sjc_0007032/Sjc_0005974/Sjc_0004570/Sjc_0005414/Sjc_0006393/Sjc_0003021/Sjc_0007140/Sjc_0001724/Sjc_0003862/Sjc_0007876/Sjc_0000909/Sjc_0005934
GO:0000715	nucleotide-excision repair, DNA damage recognition	14	-0.717039	-1.78739	0.00279136	0.0950895	0.0885127	446	tags=21%, list=5%, signal=20%	Sjc_0005239/Sjc_0003432/Sjc_0003431
GO:0060538	skeletal muscle organ development	89	-0.473293	-1.73549	0.00274931	0.0950895	0.0885127	1335	tags=34%, list=15%, signal=29%	Sjc_0007065/Sjc_0004633/Sjc_0001280/Sjc_0005072/Sjc_0002490/Sjc_0005006/Sjc_0005568/Sjc_0006499/Sjc_0008960/Sjc_0001274/Sjc_0000150/Sjc_0005286/Sjc_0003306/Sjc_0002174/Sjc_0002656/Sjc_0002935/Sjc_0008962/Sjc_0002491/Sjc_0003767/Sjc_0009705/Sjc_0001877/Sjc_0008961/Sjc_0007462/Sjc_0009704/Sjc_0002655/Sjc_0009386/Sjc_0001878/Sjc_0004714/Sjc_0008682/Sjc_0008683
GO:0007584	response to nutrient	107	-0.450258	-1.7017	0.002764	0.0950895	0.0885127	1700	tags=35%, list=19%, signal=28%	Sjc_0001236/Sjc_0001293/Sjc_0006235/Sjc_0004117/Sjc_0009409/Sjc_0005072/Sjc_0002388/Sjc_0005082/Sjc_0000225/Sjc_0001890/Sjc_0008261/Sjc_0003038/Sjc_0007176/Sjc_0005700/Sjc_0000111/Sjc_0005157/Sjc_0001396/Sjc_0000303/Sjc_0003281/Sjc_0000388/Sjc_0005424/Sjc_0005238/Sjc_0006084/Sjc_0004045/Sjc_0007728/Sjc_0001979/Sjc_0002015/Sjc_0001877/Sjc_0006085/Sjc_0006237/Sjc_0000224/Sjc_0001878/Sjc_0005423/Sjc…
GO:0044403	biological process involved in symbiotic interaction	196	-0.373001	-1.54486	0.00278979	0.0950895	0.0885127	2763	tags=42%, list=31%, signal=30%	Sjc_0006342/Sjc_0003871/Sjc_0006139/Sjc_0006566/Sjc_0008912/Sjc_0006751/Sjc_0003897/Sjc_0006158/Sjc_0004791/Sjc_0001472/Sjc_0008990/Sjc_0004990/Sjc_0001702/Sjc_0003677/Sjc_0000273/Sjc_0008955/Sjc_0008731/Sjc_0001750/Sjc_0001063/Sjc_0004924/Sjc_0004334/Sjc_0003915/Sjc_0008785/Sjc_0005361/Sjc_0004202/Sjc_0008409/Sjc_0009191/Sjc_0004377/Sjc_0002941/Sjc_0008920/Sjc_0003769/Sjc_0001406/Sjc_0003001/Sjc…
GO:0046031	ADP metabolic process	43	-0.565827	-1.81323	0.00285729	0.0966303	0.089947	1335	tags=40%, list=15%, signal=34%	Sjc_0002490/Sjc_0004457/Sjc_0004135/Sjc_0009284/Sjc_0005974/Sjc_0000303/Sjc_0008801/Sjc_0005478/Sjc_0003673/Sjc_0001512/Sjc_0002843/Sjc_0005424/Sjc_0004045/Sjc_0002491/Sjc_0001904/Sjc_0006464/Sjc_0005423
GO:0051604	protein maturation	128	-0.422497	-1.64632	0.0029852	0.10023	0.0932974	1895	tags=37%, list=22%, signal=29%	Sjc_0003511/Sjc_0004985/Sjc_0003147/Sjc_0006937/Sjc_0009443/Sjc_0006101/Sjc_0002381/Sjc_0001612/Sjc_0001084/Sjc_0002191/Sjc_0008345/Sjc_0006146/Sjc_0001254/Sjc_0003931/Sjc_0007144/Sjc_0003454/Sjc_0007387/Sjc_0008555/Sjc_0000033/Sjc_0004663/Sjc_0001313/Sjc_0005700/Sjc_0003692/Sjc_0001070/Sjc_0003371/Sjc_0006099/Sjc_0004987/Sjc_0006710/Sjc_0002656/Sjc_0005478/Sjc_0000468/Sjc_0003246/Sjc_0000823/Sjc…
GO:0061077	chaperone-mediated protein folding	35	-0.588437	-1.82059	0.00301981	0.100667	0.0937049	1646	tags=51%, list=19%, signal=42%	Sjc_0004094/Sjc_0003996/Sjc_0001060/Sjc_0006916/Sjc_0006899/Sjc_0000225/Sjc_0002859/Sjc_0004427/Sjc_0005700/Sjc_0006495/Sjc_0004114/Sjc_0006931/Sjc_0009146/Sjc_0004074/Sjc_0002791/Sjc_0005426/Sjc_0000760/Sjc_0000224
GO:0006744	ubiquinone biosynthetic process	19	-0.668341	-1.80242	0.00310132	0.101761	0.0947232	1602	tags=47%, list=18%, signal=39%	Sjc_0006182/Sjc_0005151/Sjc_0003094/Sjc_0000563/Sjc_0004116/Sjc_0006635/Sjc_0001151/Sjc_0002632/Sjc_0003139
GO:1901663	quinone biosynthetic process	19	-0.668341	-1.80242	0.00310132	0.101761	0.0947232	1602	tags=47%, list=18%, signal=39%	Sjc_0006182/Sjc_0005151/Sjc_0003094/Sjc_0000563/Sjc_0004116/Sjc_0006635/Sjc_0001151/Sjc_0002632/Sjc_0003139
GO:0007519	skeletal muscle tissue development	68	-0.506812	-1.76838	0.00311804	0.101761	0.0947232	1743	tags=41%, list=20%, signal=33%	Sjc_0007065/Sjc_0004633/Sjc_0001280/Sjc_0005072/Sjc_0002490/Sjc_0005006/Sjc_0005568/Sjc_0006499/Sjc_0008960/Sjc_0001274/Sjc_0000150/Sjc_0005286/Sjc_0003306/Sjc_0002174/Sjc_0002656/Sjc_0002935/Sjc_0008962/Sjc_0002491/Sjc_0003767/Sjc_0009705/Sjc_0001877/Sjc_0008961/Sjc_0007462/Sjc_0009704/Sjc_0002655/Sjc_0009386/Sjc_0001878/Sjc_0004714
GO:0098655	cation transmembrane transport	329	-0.326604	-1.45953	0.0031662	0.102616	0.0955184	1612	tags=28%, list=18%, signal=24%	Sjc_0001555/Sjc_0001548/Sjc_0008726/Sjc_0007202/Sjc_0001318/Sjc_0003533/Sjc_0006623/Sjc_0005149/Sjc_0008826/Sjc_0005387/Sjc_0003314/Sjc_0003096/Sjc_0005072/Sjc_0007144/Sjc_0009292/Sjc_0004620/Sjc_0009167/Sjc_0001169/Sjc_0001590/Sjc_0005456/Sjc_0003801/Sjc_0003094/Sjc_0005006/Sjc_0003647/Sjc_0003556/Sjc_0000033/Sjc_0007047/Sjc_0007821/Sjc_0000812/Sjc_0000749/Sjc_0004471/Sjc_0000770/Sjc_0003836/Sjc…
GO:0044275	cellular carbohydrate catabolic process	25	-0.657203	-1.8764	0.00328119	0.104919	0.0976625	2315	tags=60%, list=26%, signal=44%	Sjc_0005965/Sjc_0004271/Sjc_0001605/Sjc_0001680/Sjc_0004729/Sjc_0002662/Sjc_0009284/Sjc_0000589/Sjc_0001934/Sjc_0003810/Sjc_0008801/Sjc_0001904/Sjc_0008812/Sjc_0000590/Sjc_0007073
GO:0086001	cardiac muscle cell action potential	37	-0.559217	-1.74614	0.00328224	0.104919	0.0976625	1330	tags=38%, list=15%, signal=32%	Sjc_0005456/Sjc_0005006/Sjc_0000749/Sjc_0001396/Sjc_0000748/Sjc_0003673/Sjc_0005238/Sjc_0005810/Sjc_0000256/Sjc_0001877/Sjc_0001878/Sjc_0008804/Sjc_0000190/Sjc_0000189
GO:0072524	pyridine-containing compound metabolic process	86	-0.475618	-1.72711	0.00337123	0.107031	0.0996281	1344	tags=30%, list=15%, signal=26%	Sjc_0001169/Sjc_0002490/Sjc_0003115/Sjc_0009284/Sjc_0007032/Sjc_0005974/Sjc_0000560/Sjc_0000303/Sjc_0008801/Sjc_0005478/Sjc_0003673/Sjc_0001512/Sjc_0005414/Sjc_0005424/Sjc_0006393/Sjc_0004045/Sjc_0003021/Sjc_0002491/Sjc_0001904/Sjc_0000647/Sjc_0001724/Sjc_0003114/Sjc_0003515/Sjc_0006464/Sjc_0001632/Sjc_0005423
GO:1903052	positive regulation of proteolysis involved in cellular protein catabolic process	86	-0.474715	-1.72383	0.00341311	0.107628	0.100184	2399	tags=48%, list=27%, signal=35%	Sjc_0003895/Sjc_0004944/Sjc_0005251/Sjc_0004202/Sjc_0001350/Sjc_0009360/Sjc_0006661/Sjc_0006358/Sjc_0001008/Sjc_0001009/Sjc_0004985/Sjc_0005254/Sjc_0000997/Sjc_0000227/Sjc_0008263/Sjc_0005935/Sjc_0003931/Sjc_0002835/Sjc_0007144/Sjc_0005677/Sjc_0006453/Sjc_0001299/Sjc_0000150/Sjc_0007176/Sjc_0003232/Sjc_0004294/Sjc_0004987/Sjc_0007209/Sjc_0000927/Sjc_0004419/Sjc_0007728/Sjc_0008490/Sjc_0002621/Sjc…
GO:0030307	positive regulation of cell growth	129	-0.398225	-1.551	0.00350062	0.109647	0.102063	1785	tags=26%, list=20%, signal=21%	Sjc_0002725/Sjc_0002583/Sjc_0006101/Sjc_0001280/Sjc_0003996/Sjc_0005051/Sjc_0006623/Sjc_0003386/Sjc_0007896/Sjc_0008960/Sjc_0003371/Sjc_0006099/Sjc_0003306/Sjc_0002935/Sjc_0008172/Sjc_0001137/Sjc_0002538/Sjc_0008962/Sjc_0003767/Sjc_0002621/Sjc_0007581/Sjc_0009705/Sjc_0008961/Sjc_0006439/Sjc_0002622/Sjc_0006100/Sjc_0009704/Sjc_0009285/Sjc_0008682/Sjc_0000306/Sjc_0007218/Sjc_0008683/Sjc_0007295
GO:0006735	NADH regeneration	12	-0.769809	-1.88422	0.00355569	0.110629	0.102978	1136	tags=75%, list=13%, signal=65%	Sjc_0009284/Sjc_0005974/Sjc_0000303/Sjc_0008801/Sjc_0005478/Sjc_0001512/Sjc_0005424/Sjc_0001904/Sjc_0005423
GO:0006082	organic acid metabolic process	406	-0.312124	-1.42003	0.00362756	0.112118	0.104363	2096	tags=38%, list=24%, signal=31%	Sjc_0003888/Sjc_0000625/Sjc_0006944/Sjc_0005931/Sjc_0003550/Sjc_0004791/Sjc_0007056/Sjc_0000431/Sjc_0005217/Sjc_0009013/Sjc_0008021/Sjc_0004682/Sjc_0007211/Sjc_0004417/Sjc_0007686/Sjc_0006780/Sjc_0002166/Sjc_0002483/Sjc_0004726/Sjc_0009033/Sjc_0006863/Sjc_0007984/Sjc_0008731/Sjc_0003016/Sjc_0003109/Sjc_0006681/Sjc_0006713/Sjc_0006409/Sjc_0000077/Sjc_0006904/Sjc_0004123/Sjc_0002161/Sjc_0002746/Sjc…
GO:0048524	positive regulation of viral process	43	-0.557476	-1.78647	0.00379027	0.116376	0.108327	1985	tags=44%, list=23%, signal=34%	Sjc_0008920/Sjc_0003001/Sjc_0000816/Sjc_0008774/Sjc_0007778/Sjc_0003013/Sjc_0007144/Sjc_0001696/Sjc_0005428/Sjc_0006499/Sjc_0001137/Sjc_0008973/Sjc_0003767/Sjc_0006700/Sjc_0003515/Sjc_0003432/Sjc_0006112/Sjc_0003431/Sjc_0008906
GO:0006101	citrate metabolic process	34	-0.587288	-1.79855	0.00389645	0.117663	0.109525	1616	tags=44%, list=18%, signal=36%	Sjc_0007190/Sjc_0002658/Sjc_0005935/Sjc_0007032/Sjc_0005974/Sjc_0004570/Sjc_0005414/Sjc_0006393/Sjc_0003021/Sjc_0007140/Sjc_0001724/Sjc_0003862/Sjc_0007876/Sjc_0000909/Sjc_0005934
GO:0072350	tricarboxylic acid metabolic process	34	-0.587288	-1.79855	0.00389645	0.117663	0.109525	1616	tags=44%, list=18%, signal=36%	Sjc_0007190/Sjc_0002658/Sjc_0005935/Sjc_0007032/Sjc_0005974/Sjc_0004570/Sjc_0005414/Sjc_0006393/Sjc_0003021/Sjc_0007140/Sjc_0001724/Sjc_0003862/Sjc_0007876/Sjc_0000909/Sjc_0005934
GO:0006397	mRNA processing	328	-0.311046	-1.38964	0.00390782	0.117663	0.109525	1902	tags=30%, list=22%, signal=24%	Sjc_0001128/Sjc_0007547/Sjc_0000310/Sjc_0001155/Sjc_0003001/Sjc_0007645/Sjc_0006708/Sjc_0003569/Sjc_0008449/Sjc_0002725/Sjc_0000559/Sjc_0003614/Sjc_0005035/Sjc_0002087/Sjc_0008986/Sjc_0002904/Sjc_0001548/Sjc_0007172/Sjc_0003300/Sjc_0008939/Sjc_0003898/Sjc_0002661/Sjc_0000369/Sjc_0000345/Sjc_0003013/Sjc_0000188/Sjc_0001592/Sjc_0001577/Sjc_0005333/Sjc_0007144/Sjc_0007820/Sjc_0000298/Sjc_0002380/Sjc…
GO:0043161	proteasome-mediated ubiquitin-dependent protein catabolic process	239	-0.351218	-1.49236	0.00398347	0.119172	0.11093	1801	tags=29%, list=20%, signal=24%	Sjc_0005254/Sjc_0000997/Sjc_0005340/Sjc_0005246/Sjc_0003644/Sjc_0000172/Sjc_0003148/Sjc_0000227/Sjc_0001017/Sjc_0005887/Sjc_0006949/Sjc_0008263/Sjc_0008321/Sjc_0005935/Sjc_0007687/Sjc_0002578/Sjc_0003386/Sjc_0009025/Sjc_0003931/Sjc_0002835/Sjc_0005465/Sjc_0005677/Sjc_0009374/Sjc_0008728/Sjc_0004514/Sjc_0009010/Sjc_0008461/Sjc_0001372/Sjc_0005082/Sjc_0006453/Sjc_0001517/Sjc_0000969/Sjc_0001672/Sjc…
GO:0006757	ATP generation from ADP	35	-0.57303	-1.77292	0.00405921	0.120665	0.112319	1335	tags=40%, list=15%, signal=34%	Sjc_0002490/Sjc_0004135/Sjc_0005974/Sjc_0000303/Sjc_0008801/Sjc_0005478/Sjc_0003673/Sjc_0001512/Sjc_0005424/Sjc_0004045/Sjc_0002491/Sjc_0001904/Sjc_0006464/Sjc_0005423
GO:0006369	termination of RNA polymerase II transcription	23	-0.645089	-1.81225	0.00409418	0.120934	0.11257	2406	tags=61%, list=27%, signal=44%	Sjc_0007760/Sjc_0000586/Sjc_0001128/Sjc_0007547/Sjc_0003898/Sjc_0002661/Sjc_0005333/Sjc_0005922/Sjc_0003467/Sjc_0007619/Sjc_0008386/Sjc_0004895/Sjc_0008229/Sjc_0007970
GO:0086003	cardiac muscle cell contraction	28	-0.633925	-1.88188	0.00421512	0.121509	0.113105	1330	tags=39%, list=15%, signal=33%	Sjc_0005456/Sjc_0005006/Sjc_0003673/Sjc_0005238/Sjc_0005810/Sjc_0000256/Sjc_0001877/Sjc_0001878/Sjc_0008804/Sjc_0000190/Sjc_0000189
GO:1903115	regulation of actin filament-based movement	19	-0.652983	-1.761	0.004192	0.121509	0.113105	1612	tags=47%, list=18%, signal=39%	Sjc_0001555/Sjc_0005456/Sjc_0005006/Sjc_0005238/Sjc_0001877/Sjc_0001878/Sjc_0008804/Sjc_0000190/Sjc_0000189
GO:1901800	positive regulation of proteasomal protein catabolic process	77	-0.45947	-1.64118	0.00423144	0.121509	0.113105	2399	tags=45%, list=27%, signal=33%	Sjc_0003895/Sjc_0004944/Sjc_0005251/Sjc_0004202/Sjc_0001350/Sjc_0009360/Sjc_0006661/Sjc_0006358/Sjc_0005254/Sjc_0000997/Sjc_0000227/Sjc_0008263/Sjc_0005935/Sjc_0003931/Sjc_0002835/Sjc_0007144/Sjc_0005677/Sjc_0006453/Sjc_0001299/Sjc_0000150/Sjc_0007176/Sjc_0003232/Sjc_0004294/Sjc_0007209/Sjc_0000927/Sjc_0004419/Sjc_0007728/Sjc_0008490/Sjc_0005239/Sjc_0003515/Sjc_0003432/Sjc_0006212/Sjc_0003431/Sjc…
GO:0045862	positive regulation of proteolysis	173	-0.381392	-1.5619	0.00424383	0.121509	0.113105	2401	tags=41%, list=27%, signal=30%	Sjc_0002992/Sjc_0003895/Sjc_0004944/Sjc_0006266/Sjc_0005251/Sjc_0004202/Sjc_0001350/Sjc_0009360/Sjc_0006661/Sjc_0006358/Sjc_0001008/Sjc_0003513/Sjc_0001009/Sjc_0003654/Sjc_0003769/Sjc_0003511/Sjc_0004985/Sjc_0008297/Sjc_0005254/Sjc_0000997/Sjc_0005242/Sjc_0006101/Sjc_0001280/Sjc_0004094/Sjc_0000227/Sjc_0008263/Sjc_0005935/Sjc_0006146/Sjc_0003931/Sjc_0002835/Sjc_0005072/Sjc_0007144/Sjc_0005677/Sjc…
GO:0030162	regulation of proteolysis	295	-0.32516	-1.43073	0.00414599	0.121509	0.113105	1895	tags=29%, list=22%, signal=24%	Sjc_0003511/Sjc_0008232/Sjc_0004985/Sjc_0005848/Sjc_0008297/Sjc_0005254/Sjc_0000997/Sjc_0005242/Sjc_0006101/Sjc_0001280/Sjc_0003523/Sjc_0004094/Sjc_0005536/Sjc_0000227/Sjc_0003996/Sjc_0005887/Sjc_0008263/Sjc_0005935/Sjc_0006146/Sjc_0007687/Sjc_0002578/Sjc_0003931/Sjc_0002835/Sjc_0005072/Sjc_0007144/Sjc_0005677/Sjc_0009374/Sjc_0006851/Sjc_0003914/Sjc_0003454/Sjc_0001372/Sjc_0006453/Sjc_0008506/Sjc…
GO:0061621	canonical glycolysis	11	-0.780802	-1.87262	0.00437127	0.121532	0.113126	971	tags=73%, list=11%, signal=65%	Sjc_0005974/Sjc_0000303/Sjc_0008801/Sjc_0005478/Sjc_0001512/Sjc_0005424/Sjc_0001904/Sjc_0005423
GO:0061718	glucose catabolic process to pyruvate	11	-0.780802	-1.87262	0.00437127	0.121532	0.113126	971	tags=73%, list=11%, signal=65%	Sjc_0005974/Sjc_0000303/Sjc_0008801/Sjc_0005478/Sjc_0001512/Sjc_0005424/Sjc_0001904/Sjc_0005423
GO:0006294	nucleotide-excision repair, preincision complex assembly	19	-0.651694	-1.75753	0.00433781	0.121532	0.113126	1005	tags=26%, list=11%, signal=23%	Sjc_0004786/Sjc_0003149/Sjc_0005239/Sjc_0003432/Sjc_0003431
GO:0034394	protein localization to cell surface	46	-0.5294	-1.71543	0.0043323	0.121532	0.113126	1451	tags=41%, list=16%, signal=35%	Sjc_0003783/Sjc_0007399/Sjc_0006101/Sjc_0002835/Sjc_0003916/Sjc_0005006/Sjc_0008960/Sjc_0006099/Sjc_0003306/Sjc_0002935/Sjc_0003673/Sjc_0008962/Sjc_0009705/Sjc_0008961/Sjc_0006100/Sjc_0009704/Sjc_0009285/Sjc_0000306/Sjc_0008804
GO:0010498	proteasomal protein catabolic process	273	-0.331828	-1.45062	0.00440076	0.121532	0.113126	1801	tags=28%, list=20%, signal=23%	Sjc_0005254/Sjc_0000997/Sjc_0005340/Sjc_0005246/Sjc_0003644/Sjc_0000172/Sjc_0007774/Sjc_0003148/Sjc_0000227/Sjc_0001017/Sjc_0005887/Sjc_0006949/Sjc_0008263/Sjc_0008321/Sjc_0005935/Sjc_0007687/Sjc_0002578/Sjc_0003386/Sjc_0009025/Sjc_0003931/Sjc_0002835/Sjc_0005465/Sjc_0007144/Sjc_0005677/Sjc_0009374/Sjc_0008728/Sjc_0004514/Sjc_0009010/Sjc_0008461/Sjc_0001372/Sjc_0005082/Sjc_0006453/Sjc_0001517/Sjc…
GO:0006952	defense response	427	-0.296449	-1.35555	0.00440086	0.121532	0.113126	1831	tags=26%, list=21%, signal=22%	Sjc_0003744/Sjc_0007161/Sjc_0006708/Sjc_0000997/Sjc_0008449/Sjc_0002424/Sjc_0002583/Sjc_0007456/Sjc_0005242/Sjc_0000559/Sjc_0001293/Sjc_0007778/Sjc_0000785/Sjc_0005370/Sjc_0009208/Sjc_0002199/Sjc_0007942/Sjc_0001555/Sjc_0005051/Sjc_0007202/Sjc_0006182/Sjc_0001318/Sjc_0002146/Sjc_0005935/Sjc_0001417/Sjc_0003013/Sjc_0002151/Sjc_0006194/Sjc_0002578/Sjc_0003386/Sjc_0009409/Sjc_0002437/Sjc_0005072/Sjc…
GO:0086065	cell communication involved in cardiac conduction	24	-0.623963	-1.76305	0.00443061	0.121633	0.113221	867	tags=38%, list=10%, signal=34%	Sjc_0001396/Sjc_0005238/Sjc_0005810/Sjc_0000256/Sjc_0001877/Sjc_0001878/Sjc_0008804/Sjc_0000190/Sjc_0000189
GO:0061620	glycolytic process through glucose-6-phosphate	12	-0.756893	-1.85261	0.00447099	0.122024	0.113584	971	tags=67%, list=11%, signal=59%	Sjc_0005974/Sjc_0000303/Sjc_0008801/Sjc_0005478/Sjc_0001512/Sjc_0005424/Sjc_0001904/Sjc_0005423
GO:0061615	glycolytic process through fructose-6-phosphate	13	-0.729331	-1.81969	0.0045938	0.123214	0.114692	971	tags=62%, list=11%, signal=55%	Sjc_0005974/Sjc_0000303/Sjc_0008801/Sjc_0005478/Sjc_0001512/Sjc_0005424/Sjc_0001904/Sjc_0005423
GO:0042255	ribosome assembly	49	-0.524692	-1.7121	0.00459019	0.123214	0.114692	1542	tags=39%, list=18%, signal=32%	Sjc_0002913/Sjc_0002651/Sjc_0001577/Sjc_0000919/Sjc_0003536/Sjc_0006699/Sjc_0001046/Sjc_0006379/Sjc_0001137/Sjc_0000247/Sjc_0005661/Sjc_0001058/Sjc_0006436/Sjc_0002648/Sjc_0008418/Sjc_0007923/Sjc_0005210/Sjc_0000157/Sjc_0002110
GO:0060048	cardiac muscle contraction	52	-0.507937	-1.68275	0.0045813	0.123214	0.114692	1743	tags=37%, list=20%, signal=29%	Sjc_0007065/Sjc_0001680/Sjc_0007586/Sjc_0001555/Sjc_0005072/Sjc_0005456/Sjc_0005006/Sjc_0001396/Sjc_0003673/Sjc_0005238/Sjc_0005810/Sjc_0008280/Sjc_0000256/Sjc_0001877/Sjc_0001878/Sjc_0001346/Sjc_0008804/Sjc_0000190/Sjc_0000189
GO:0007032	endosome organization	49	-0.524086	-1.71012	0.00466865	0.124506	0.115895	2535	tags=43%, list=29%, signal=31%	Sjc_0001702/Sjc_0003677/Sjc_0003915/Sjc_0005361/Sjc_0006142/Sjc_0005113/Sjc_0000816/Sjc_0008774/Sjc_0009452/Sjc_0005687/Sjc_0002978/Sjc_0007335/Sjc_0007951/Sjc_0006558/Sjc_0002538/Sjc_0003066/Sjc_0001942/Sjc_0005748/Sjc_0006112/Sjc_0005357/Sjc_0005688
GO:0033119	negative regulation of RNA splicing	25	-0.643504	-1.83728	0.00473188	0.125475	0.116797	1581	tags=48%, list=18%, signal=39%	Sjc_0008939/Sjc_0008814/Sjc_0001828/Sjc_0000111/Sjc_0003799/Sjc_0003348/Sjc_0003223/Sjc_0002694/Sjc_0006119/Sjc_0009285/Sjc_0000306/Sjc_0006712
GO:0071871	response to epinephrine	11	-0.776278	-1.86177	0.00485313	0.126432	0.117688	864	tags=55%, list=10%, signal=49%	Sjc_0000303/Sjc_0005424/Sjc_0001877/Sjc_0006237/Sjc_0001878/Sjc_0005423
GO:0006743	ubiquinone metabolic process	20	-0.658543	-1.79693	0.00480639	0.126432	0.117688	1602	tags=45%, list=18%, signal=37%	Sjc_0006182/Sjc_0005151/Sjc_0003094/Sjc_0000563/Sjc_0004116/Sjc_0006635/Sjc_0001151/Sjc_0002632/Sjc_0003139
GO:0000272	polysaccharide catabolic process	21	-0.655973	-1.79606	0.00493051	0.126432	0.117688	2315	tags=62%, list=26%, signal=46%	Sjc_0005965/Sjc_0004271/Sjc_0001605/Sjc_0001680/Sjc_0004729/Sjc_0002662/Sjc_0000589/Sjc_0001934/Sjc_0003810/Sjc_0008801/Sjc_0008812/Sjc_0000590/Sjc_0007073
GO:0005980	glycogen catabolic process	21	-0.655973	-1.79606	0.00493051	0.126432	0.117688	2315	tags=62%, list=26%, signal=46%	Sjc_0005965/Sjc_0004271/Sjc_0001605/Sjc_0001680/Sjc_0004729/Sjc_0002662/Sjc_0000589/Sjc_0001934/Sjc_0003810/Sjc_0008801/Sjc_0008812/Sjc_0000590/Sjc_0007073
GO:0009251	glucan catabolic process	21	-0.655973	-1.79606	0.00493051	0.126432	0.117688	2315	tags=62%, list=26%, signal=46%	Sjc_0005965/Sjc_0004271/Sjc_0001605/Sjc_0001680/Sjc_0004729/Sjc_0002662/Sjc_0000589/Sjc_0001934/Sjc_0003810/Sjc_0008801/Sjc_0008812/Sjc_0000590/Sjc_0007073
GO:0044247	cellular polysaccharide catabolic process	21	-0.655973	-1.79606	0.00493051	0.126432	0.117688	2315	tags=62%, list=26%, signal=46%	Sjc_0005965/Sjc_0004271/Sjc_0001605/Sjc_0001680/Sjc_0004729/Sjc_0002662/Sjc_0000589/Sjc_0001934/Sjc_0003810/Sjc_0008801/Sjc_0008812/Sjc_0000590/Sjc_0007073
GO:0086004	regulation of cardiac muscle cell contraction	18	-0.656905	-1.73555	0.00553695	0.141207	0.131441	1612	tags=50%, list=18%, signal=41%	Sjc_0001555/Sjc_0005456/Sjc_0005006/Sjc_0005238/Sjc_0001877/Sjc_0001878/Sjc_0008804/Sjc_0000190/Sjc_0000189
GO:0019674	NAD metabolic process	36	-0.608991	-1.89128	0.00559386	0.141883	0.13207	1136	tags=42%, list=13%, signal=36%	Sjc_0009284/Sjc_0005974/Sjc_0000303/Sjc_0008801/Sjc_0005478/Sjc_0003673/Sjc_0001512/Sjc_0005424/Sjc_0006393/Sjc_0004045/Sjc_0001904/Sjc_0001724/Sjc_0003515/Sjc_0001632/Sjc_0005423
GO:1903902	positive regulation of viral life cycle	32	-0.570277	-1.72942	0.00565923	0.142766	0.132891	1985	tags=47%, list=23%, signal=36%	Sjc_0008920/Sjc_0003001/Sjc_0008774/Sjc_0007778/Sjc_0007144/Sjc_0005428/Sjc_0006499/Sjc_0001137/Sjc_0008973/Sjc_0006700/Sjc_0003515/Sjc_0003432/Sjc_0006112/Sjc_0003431/Sjc_0008906
GO:0086014	atrial cardiac muscle cell action potential	11	-0.769447	-1.84539	0.00609221	0.148085	0.137843	586	tags=55%, list=7%, signal=51%	Sjc_0005006/Sjc_0005810/Sjc_0000256/Sjc_0001877/Sjc_0001878/Sjc_0008804
GO:0086026	atrial cardiac muscle cell to AV node cell signaling	11	-0.769447	-1.84539	0.00609221	0.148085	0.137843	586	tags=55%, list=7%, signal=51%	Sjc_0005006/Sjc_0005810/Sjc_0000256/Sjc_0001877/Sjc_0001878/Sjc_0008804
GO:0086066	atrial cardiac muscle cell to AV node cell communication	11	-0.769447	-1.84539	0.00609221	0.148085	0.137843	586	tags=55%, list=7%, signal=51%	Sjc_0005006/Sjc_0005810/Sjc_0000256/Sjc_0001877/Sjc_0001878/Sjc_0008804
GO:0071872	cellular response to epinephrine stimulus	10	-0.782505	-1.81648	0.00590766	0.148085	0.137843	864	tags=60%, list=10%, signal=54%	Sjc_0000303/Sjc_0005424/Sjc_0001877/Sjc_0006237/Sjc_0001878/Sjc_0005423
GO:2000010	positive regulation of protein localization to cell surface	23	-0.627534	-1.76293	0.00597221	0.148085	0.137843	1150	tags=43%, list=13%, signal=38%	Sjc_0008960/Sjc_0003306/Sjc_0002935/Sjc_0003673/Sjc_0008962/Sjc_0009705/Sjc_0008961/Sjc_0009704/Sjc_0009285/Sjc_0000306
GO:0042698	ovulation cycle	35	-0.554679	-1.71614	0.00599213	0.148085	0.137843	1161	tags=34%, list=13%, signal=30%	Sjc_0008261/Sjc_0008960/Sjc_0003306/Sjc_0002935/Sjc_0008962/Sjc_0006627/Sjc_0009705/Sjc_0008961/Sjc_0001389/Sjc_0009704/Sjc_0004118/Sjc_0001388
GO:0001558	regulation of cell growth	238	-0.354951	-1.51007	0.00602559	0.148085	0.137843	1785	tags=24%, list=20%, signal=20%	Sjc_0002725/Sjc_0002583/Sjc_0006101/Sjc_0001280/Sjc_0003996/Sjc_0006934/Sjc_0005051/Sjc_0006623/Sjc_0000369/Sjc_0001592/Sjc_0003386/Sjc_0007803/Sjc_0007799/Sjc_0001169/Sjc_0002490/Sjc_0006924/Sjc_0005568/Sjc_0007896/Sjc_0001890/Sjc_0008960/Sjc_0001274/Sjc_0004471/Sjc_0004929/Sjc_0003371/Sjc_0002485/Sjc_0006099/Sjc_0003306/Sjc_0005497/Sjc_0000914/Sjc_0002935/Sjc_0008172/Sjc_0001137/Sjc_0002538/Sjc…
GO:0030048	actin filament-based movement	56	-0.481763	-1.61426	0.00622473	0.150522	0.140112	2135	tags=38%, list=24%, signal=29%	Sjc_0002672/Sjc_0001682/Sjc_0005455/Sjc_0008898/Sjc_0003769/Sjc_0007586/Sjc_0001555/Sjc_0005456/Sjc_0005006/Sjc_0006535/Sjc_0007047/Sjc_0003673/Sjc_0005238/Sjc_0005810/Sjc_0000256/Sjc_0009310/Sjc_0001877/Sjc_0001878/Sjc_0008804/Sjc_0000190/Sjc_0000189
GO:0036258	multivesicular body assembly	21	-0.645164	-1.76646	0.00628544	0.150895	0.140459	2535	tags=62%, list=29%, signal=44%	Sjc_0001702/Sjc_0003677/Sjc_0003915/Sjc_0005361/Sjc_0005113/Sjc_0008774/Sjc_0009452/Sjc_0002978/Sjc_0002538/Sjc_0001942/Sjc_0005748/Sjc_0006112/Sjc_0005357
GO:0032787	monocarboxylic acid metabolic process	164	-0.374142	-1.513	0.00630481	0.150895	0.140459	2092	tags=43%, list=24%, signal=33%	Sjc_0000625/Sjc_0005931/Sjc_0004791/Sjc_0007056/Sjc_0005217/Sjc_0008021/Sjc_0007211/Sjc_0006780/Sjc_0002166/Sjc_0009033/Sjc_0008731/Sjc_0006904/Sjc_0002746/Sjc_0006091/Sjc_0001807/Sjc_0001605/Sjc_0008795/Sjc_0007057/Sjc_0009229/Sjc_0005455/Sjc_0003060/Sjc_0004740/Sjc_0003987/Sjc_0008550/Sjc_0001329/Sjc_0001937/Sjc_0009112/Sjc_0001236/Sjc_0007119/Sjc_0001555/Sjc_0002658/Sjc_0003386/Sjc_0002856/Sjc…
GO:0006165	nucleoside diphosphate phosphorylation	52	-0.497117	-1.6469	0.00635219	0.151253	0.140792	1335	tags=35%, list=15%, signal=30%	Sjc_0002490/Sjc_0004135/Sjc_0009284/Sjc_0005974/Sjc_0002313/Sjc_0000303/Sjc_0008801/Sjc_0005478/Sjc_0003673/Sjc_0001512/Sjc_0005424/Sjc_0002198/Sjc_0004045/Sjc_0002491/Sjc_0001904/Sjc_0006464/Sjc_0008892/Sjc_0005423
GO:0009435	NAD biosynthetic process	19	-0.631194	-1.70224	0.00652489	0.153023	0.14244	971	tags=47%, list=11%, signal=42%	Sjc_0005974/Sjc_0000303/Sjc_0008801/Sjc_0005478/Sjc_0001512/Sjc_0005424/Sjc_0001904/Sjc_0001632/Sjc_0005423
GO:0051966	regulation of synaptic transmission, glutamatergic	39	-0.5268	-1.65501	0.00650618	0.153023	0.14244	1150	tags=33%, list=13%, signal=29%	Sjc_0008960/Sjc_0001274/Sjc_0003306/Sjc_0002935/Sjc_0005238/Sjc_0008962/Sjc_0002621/Sjc_0009705/Sjc_0008961/Sjc_0002622/Sjc_0009704/Sjc_0006170/Sjc_0000190
GO:0043436	oxoacid metabolic process	405	-0.309151	-1.40509	0.00649408	0.153023	0.14244	2096	tags=38%, list=24%, signal=31%	Sjc_0003888/Sjc_0000625/Sjc_0006944/Sjc_0005931/Sjc_0003550/Sjc_0004791/Sjc_0007056/Sjc_0000431/Sjc_0005217/Sjc_0009013/Sjc_0008021/Sjc_0004682/Sjc_0007211/Sjc_0004417/Sjc_0007686/Sjc_0006780/Sjc_0002166/Sjc_0002483/Sjc_0004726/Sjc_0009033/Sjc_0006863/Sjc_0007984/Sjc_0008731/Sjc_0003016/Sjc_0003109/Sjc_0006681/Sjc_0006713/Sjc_0006409/Sjc_0000077/Sjc_0006904/Sjc_0004123/Sjc_0002161/Sjc_0002746/Sjc…
GO:0086002	cardiac muscle cell action potential involved in contraction	18	-0.646868	-1.70903	0.00671032	0.155242	0.144504	1299	tags=39%, list=15%, signal=33%	Sjc_0005006/Sjc_0003673/Sjc_0005810/Sjc_0000256/Sjc_0001877/Sjc_0001878/Sjc_0008804
GO:0098900	regulation of action potential	24	-0.602934	-1.70363	0.00670268	0.155242	0.144504	1612	tags=46%, list=18%, signal=38%	Sjc_0001555/Sjc_0007144/Sjc_0005456/Sjc_0005006/Sjc_0005238/Sjc_0001877/Sjc_0001878/Sjc_0006712/Sjc_0008804/Sjc_0000190/Sjc_0000189
GO:0055082	cellular chemical homeostasis	279	-0.327908	-1.43559	0.00671927	0.155242	0.144504	2003	tags=32%, list=23%, signal=25%	Sjc_0006041/Sjc_0005455/Sjc_0008920/Sjc_0003783/Sjc_0007424/Sjc_0001329/Sjc_0003147/Sjc_0003744/Sjc_0007013/Sjc_0002955/Sjc_0009217/Sjc_0002583/Sjc_0000412/Sjc_0000816/Sjc_0008787/Sjc_0001236/Sjc_0006235/Sjc_0003938/Sjc_0003523/Sjc_0006116/Sjc_0001555/Sjc_0001548/Sjc_0001318/Sjc_0006623/Sjc_0005149/Sjc_0002468/Sjc_0005072/Sjc_0007290/Sjc_0004620/Sjc_0001841/Sjc_0002490/Sjc_0005456/Sjc_0003801/Sjc…
GO:0003015	heart process	114	-0.402743	-1.5454	0.00683792	0.157205	0.146332	1743	tags=32%, list=20%, signal=26%	Sjc_0007065/Sjc_0001680/Sjc_0007586/Sjc_0006235/Sjc_0001555/Sjc_0006623/Sjc_0002069/Sjc_0005072/Sjc_0005456/Sjc_0005006/Sjc_0008960/Sjc_0003038/Sjc_0000749/Sjc_0003371/Sjc_0003306/Sjc_0001396/Sjc_0000748/Sjc_0002935/Sjc_0004195/Sjc_0003673/Sjc_0005238/Sjc_0008962/Sjc_0005810/Sjc_0001979/Sjc_0008280/Sjc_0000256/Sjc_0009705/Sjc_0001877/Sjc_0008961/Sjc_0006237/Sjc_0009704/Sjc_0009386/Sjc_0001878/Sjc…
GO:1903364	positive regulation of cellular protein catabolic process	93	-0.453963	-1.67168	0.00692835	0.158503	0.14754	2399	tags=45%, list=27%, signal=33%	Sjc_0003895/Sjc_0004944/Sjc_0005251/Sjc_0004202/Sjc_0001350/Sjc_0009360/Sjc_0006661/Sjc_0006358/Sjc_0001008/Sjc_0001009/Sjc_0003426/Sjc_0004985/Sjc_0005254/Sjc_0000997/Sjc_0000227/Sjc_0008263/Sjc_0005935/Sjc_0003931/Sjc_0002835/Sjc_0007144/Sjc_0005677/Sjc_0006453/Sjc_0001299/Sjc_0000150/Sjc_0007176/Sjc_0003232/Sjc_0004294/Sjc_0004987/Sjc_0007209/Sjc_0000927/Sjc_0004419/Sjc_0007728/Sjc_0008490/Sjc…
GO:1990573	potassium ion import across plasma membrane	11	-0.761353	-1.82597	0.00712546	0.162217	0.150998	1092	tags=45%, list=12%, signal=40%	Sjc_0000749/Sjc_0000748/Sjc_0005238/Sjc_0000190/Sjc_0000189
GO:2000008	regulation of protein localization to cell surface	38	-0.537733	-1.67978	0.00716684	0.162367	0.151137	1451	tags=37%, list=16%, signal=31%	Sjc_0002835/Sjc_0003916/Sjc_0008960/Sjc_0006099/Sjc_0003306/Sjc_0002935/Sjc_0003673/Sjc_0008962/Sjc_0009705/Sjc_0008961/Sjc_0006100/Sjc_0009704/Sjc_0009285/Sjc_0000306
GO:0008340	determination of adult lifespan	231	-0.347821	-1.4769	0.00722522	0.162899	0.151632	2051	tags=33%, list=23%, signal=26%	Sjc_0007744/Sjc_0003171/Sjc_0009475/Sjc_0005455/Sjc_0003060/Sjc_0003654/Sjc_0001406/Sjc_0005464/Sjc_0008039/Sjc_0009205/Sjc_0003744/Sjc_0007161/Sjc_0003327/Sjc_0000172/Sjc_0002087/Sjc_0007885/Sjc_0002191/Sjc_0001555/Sjc_0006182/Sjc_0008939/Sjc_0002146/Sjc_0002913/Sjc_0001254/Sjc_0003096/Sjc_0002388/Sjc_0002490/Sjc_0005456/Sjc_0001696/Sjc_0001642/Sjc_0005006/Sjc_0007523/Sjc_0008114/Sjc_0000225/Sjc…
GO:0007288	sperm axoneme assembly	13	-0.71028	-1.77216	0.00751525	0.165553	0.154103	658	tags=46%, list=7%, signal=43%	Sjc_0007144/Sjc_0006022/Sjc_0003462/Sjc_0001875/Sjc_0003356/Sjc_0003323
GO:0022617	extracellular matrix disassembly	21	-0.636658	-1.74318	0.00741455	0.165553	0.154103	1715	tags=57%, list=19%, signal=46%	Sjc_0006101/Sjc_0006597/Sjc_0000033/Sjc_0009488/Sjc_0004663/Sjc_0006099/Sjc_0002174/Sjc_0006710/Sjc_0002656/Sjc_0006100/Sjc_0003483/Sjc_0002655
GO:0002027	regulation of heart rate	37	-0.529063	-1.65199	0.0074456	0.165553	0.154103	1092	tags=32%, list=12%, signal=29%	Sjc_0000749/Sjc_0001396/Sjc_0000748/Sjc_0003673/Sjc_0005238/Sjc_0001979/Sjc_0001877/Sjc_0009386/Sjc_0001878/Sjc_0008804/Sjc_0000190/Sjc_0000189
GO:0043648	dicarboxylic acid metabolic process	55	-0.481614	-1.61554	0.00755579	0.165553	0.154103	2689	tags=55%, list=31%, signal=38%	Sjc_0003888/Sjc_0006944/Sjc_0007686/Sjc_0004726/Sjc_0003109/Sjc_0006681/Sjc_0000077/Sjc_0002161/Sjc_0003060/Sjc_0008550/Sjc_0000785/Sjc_0007190/Sjc_0002658/Sjc_0003061/Sjc_0002856/Sjc_0007290/Sjc_0009284/Sjc_0008953/Sjc_0007176/Sjc_0007032/Sjc_0005974/Sjc_0000416/Sjc_0004570/Sjc_0006393/Sjc_0007140/Sjc_0001724/Sjc_0003862/Sjc_0002674/Sjc_0001632/Sjc_0006467
GO:0007517	muscle organ development	182	-0.367361	-1.51041	0.00748873	0.165553	0.154103	1743	tags=28%, list=20%, signal=23%	Sjc_0007065/Sjc_0004633/Sjc_0008986/Sjc_0001280/Sjc_0002069/Sjc_0004117/Sjc_0003651/Sjc_0000731/Sjc_0003074/Sjc_0005072/Sjc_0007144/Sjc_0001169/Sjc_0002490/Sjc_0005006/Sjc_0006240/Sjc_0005568/Sjc_0006535/Sjc_0006499/Sjc_0008960/Sjc_0001274/Sjc_0000150/Sjc_0000451/Sjc_0005286/Sjc_0007527/Sjc_0003306/Sjc_0005497/Sjc_0002174/Sjc_0002656/Sjc_0002935/Sjc_0007619/Sjc_0003073/Sjc_0008962/Sjc_0002491/Sjc…
GO:0007568	aging	354	-0.308303	-1.38943	0.00753164	0.165553	0.154103	2022	tags=30%, list=23%, signal=24%	Sjc_0003171/Sjc_0009475/Sjc_0005455/Sjc_0003060/Sjc_0003654/Sjc_0001406/Sjc_0005464/Sjc_0004651/Sjc_0004985/Sjc_0008039/Sjc_0008858/Sjc_0009205/Sjc_0003744/Sjc_0007161/Sjc_0003327/Sjc_0000172/Sjc_0005242/Sjc_0006101/Sjc_0001293/Sjc_0002087/Sjc_0006235/Sjc_0007885/Sjc_0002191/Sjc_0001555/Sjc_0006182/Sjc_0008939/Sjc_0002146/Sjc_0002913/Sjc_0001254/Sjc_0003096/Sjc_0000731/Sjc_0002388/Sjc_0009167/Sjc…
GO:0036257	multivesicular body organization	23	-0.618468	-1.73746	0.00762487	0.166286	0.154785	2535	tags=57%, list=29%, signal=40%	Sjc_0001702/Sjc_0003677/Sjc_0003915/Sjc_0005361/Sjc_0005113/Sjc_0008774/Sjc_0009452/Sjc_0002978/Sjc_0002538/Sjc_0001942/Sjc_0005748/Sjc_0006112/Sjc_0005357
GO:0032509	endosome transport via multivesicular body sorting pathway	26	-0.617804	-1.79573	0.00797014	0.170907	0.159087	1962	tags=50%, list=22%, signal=39%	Sjc_0004936/Sjc_0005113/Sjc_0000816/Sjc_0008774/Sjc_0003121/Sjc_0003916/Sjc_0002978/Sjc_0002803/Sjc_0002538/Sjc_0001942/Sjc_0003515/Sjc_0005748/Sjc_0006112
GO:0051453	regulation of intracellular pH	45	-0.516808	-1.66947	0.00800312	0.170907	0.159087	2047	tags=47%, list=23%, signal=36%	Sjc_0008111/Sjc_0006041/Sjc_0003783/Sjc_0000816/Sjc_0006116/Sjc_0004620/Sjc_0001824/Sjc_0007335/Sjc_0000770/Sjc_0007951/Sjc_0005299/Sjc_0002485/Sjc_0002996/Sjc_0009118/Sjc_0006670/Sjc_0009120/Sjc_0008547/Sjc_0001790/Sjc_0005874/Sjc_0007207/Sjc_0000272
GO:0061337	cardiac conduction	44	-0.517709	-1.66709	0.00789719	0.170907	0.159087	1679	tags=41%, list=19%, signal=33%	Sjc_0006235/Sjc_0001555/Sjc_0006623/Sjc_0005456/Sjc_0005006/Sjc_0000749/Sjc_0001396/Sjc_0000748/Sjc_0004195/Sjc_0005238/Sjc_0005810/Sjc_0000256/Sjc_0001877/Sjc_0006237/Sjc_0001878/Sjc_0008804/Sjc_0000190/Sjc_0000189
GO:0030728	ovulation	37	-0.521067	-1.62702	0.00798645	0.170907	0.159087	1150	tags=41%, list=13%, signal=35%	Sjc_0007498/Sjc_0000042/Sjc_0001712/Sjc_0008960/Sjc_0004664/Sjc_0003306/Sjc_0002935/Sjc_0008962/Sjc_0009705/Sjc_0008961/Sjc_0001389/Sjc_0009704/Sjc_0006882/Sjc_0006881/Sjc_0001388
GO:0046939	nucleotide phosphorylation	54	-0.483703	-1.61857	0.00801987	0.170907	0.159087	1335	tags=33%, list=15%, signal=28%	Sjc_0002490/Sjc_0004135/Sjc_0009284/Sjc_0005974/Sjc_0002313/Sjc_0000303/Sjc_0008801/Sjc_0005478/Sjc_0003673/Sjc_0001512/Sjc_0005424/Sjc_0002198/Sjc_0004045/Sjc_0002491/Sjc_0001904/Sjc_0006464/Sjc_0008892/Sjc_0005423
GO:0032570	response to progesterone	24	-0.590851	-1.66949	0.00829611	0.175991	0.163818	1308	tags=46%, list=15%, signal=39%	Sjc_0009249/Sjc_0008960/Sjc_0003306/Sjc_0002935/Sjc_0008962/Sjc_0009705/Sjc_0008961/Sjc_0001389/Sjc_0002475/Sjc_0009704/Sjc_0001388
GO:0042776	proton motive force-driven mitochondrial ATP synthesis	10	-0.765296	-1.77653	0.00854075	0.179655	0.16723	1927	tags=80%, list=22%, signal=63%	Sjc_0001147/Sjc_0008039/Sjc_0003314/Sjc_0003096/Sjc_0003792/Sjc_0000468/Sjc_0006670/Sjc_0002845
GO:0016052	carbohydrate catabolic process	66	-0.46154	-1.60414	0.00854585	0.179655	0.16723	1136	tags=45%, list=13%, signal=40%	Sjc_0005965/Sjc_0004271/Sjc_0007797/Sjc_0002746/Sjc_0001605/Sjc_0003286/Sjc_0001680/Sjc_0004729/Sjc_0002662/Sjc_0002490/Sjc_0009284/Sjc_0000589/Sjc_0001934/Sjc_0005974/Sjc_0003810/Sjc_0000303/Sjc_0008801/Sjc_0005478/Sjc_0003673/Sjc_0001512/Sjc_0007792/Sjc_0005424/Sjc_0004045/Sjc_0002491/Sjc_0001904/Sjc_0006464/Sjc_0008812/Sjc_0000590/Sjc_0007073/Sjc_0005423
GO:0098869	cellular oxidant detoxification	28	-0.594885	-1.76599	0.00919594	0.188234	0.175215	1428	tags=43%, list=16%, signal=36%	Sjc_0002388/Sjc_0001841/Sjc_0006577/Sjc_0008539/Sjc_0004169/Sjc_0000647/Sjc_0005875/Sjc_0002015/Sjc_0006542/Sjc_0005754/Sjc_0008538/Sjc_0002499
GO:1990748	cellular detoxification	28	-0.594885	-1.76599	0.00919594	0.188234	0.175215	1428	tags=43%, list=16%, signal=36%	Sjc_0002388/Sjc_0001841/Sjc_0006577/Sjc_0008539/Sjc_0004169/Sjc_0000647/Sjc_0005875/Sjc_0002015/Sjc_0006542/Sjc_0005754/Sjc_0008538/Sjc_0002499
GO:0010669	epithelial structure maintenance	33	-0.548864	-1.68109	0.00909089	0.188234	0.175215	1150	tags=36%, list=13%, signal=32%	Sjc_0008960/Sjc_0002847/Sjc_0003306/Sjc_0002935/Sjc_0008962/Sjc_0003767/Sjc_0001942/Sjc_0009705/Sjc_0008961/Sjc_0009704/Sjc_0008812/Sjc_0007073
GO:0009165	nucleotide biosynthetic process	180	-0.362821	-1.4914	0.00912394	0.188234	0.175215	1526	tags=29%, list=17%, signal=24%	Sjc_0005387/Sjc_0003314/Sjc_0003651/Sjc_0003096/Sjc_0001594/Sjc_0005500/Sjc_0009292/Sjc_0002773/Sjc_0003914/Sjc_0001169/Sjc_0002490/Sjc_0003115/Sjc_0004135/Sjc_0006808/Sjc_0000770/Sjc_0007032/Sjc_0002485/Sjc_0005974/Sjc_0002313/Sjc_0000416/Sjc_0003792/Sjc_0006862/Sjc_0009110/Sjc_0000303/Sjc_0008801/Sjc_0005478/Sjc_0000468/Sjc_0006670/Sjc_0003673/Sjc_0001512/Sjc_0005414/Sjc_0007528/Sjc_0005424/Sjc…
GO:0045321	leukocyte activation	362	-0.301032	-1.35672	0.00905689	0.188234	0.175215	2092	tags=30%, list=24%, signal=24%	Sjc_0001605/Sjc_0003426/Sjc_0006541/Sjc_0007087/Sjc_0007454/Sjc_0009415/Sjc_0008920/Sjc_0007299/Sjc_0004740/Sjc_0003769/Sjc_0004534/Sjc_0003286/Sjc_0004651/Sjc_0004985/Sjc_0001325/Sjc_0004568/Sjc_0003159/Sjc_0008832/Sjc_0003001/Sjc_0009112/Sjc_0008077/Sjc_0005246/Sjc_0000172/Sjc_0005242/Sjc_0000816/Sjc_0001680/Sjc_0001293/Sjc_0001280/Sjc_0003727/Sjc_0009178/Sjc_0007942/Sjc_0006934/Sjc_0007202/Sjc…
GO:0034220	ion transmembrane transport	413	-0.297094	-1.35405	0.00909972	0.188234	0.175215	2312	tags=34%, list=26%, signal=27%	Sjc_0007060/Sjc_0004202/Sjc_0000554/Sjc_0008409/Sjc_0001350/Sjc_0004123/Sjc_0009191/Sjc_0004793/Sjc_0009360/Sjc_0001653/Sjc_0004352/Sjc_0007977/Sjc_0005261/Sjc_0002672/Sjc_0003967/Sjc_0007543/Sjc_0006541/Sjc_0005056/Sjc_0001848/Sjc_0008268/Sjc_0008111/Sjc_0007976/Sjc_0006041/Sjc_0005455/Sjc_0004771/Sjc_0001147/Sjc_0004651/Sjc_0008039/Sjc_0003147/Sjc_0003744/Sjc_0003823/Sjc_0007013/Sjc_0004679/Sjc…
GO:0070252	actin-mediated cell contraction	51	-0.496839	-1.63808	0.00924629	0.188439	0.175405	2135	tags=39%, list=24%, signal=30%	Sjc_0002672/Sjc_0001682/Sjc_0005455/Sjc_0008898/Sjc_0003769/Sjc_0007586/Sjc_0001555/Sjc_0005456/Sjc_0005006/Sjc_0006535/Sjc_0007047/Sjc_0003673/Sjc_0005238/Sjc_0005810/Sjc_0000256/Sjc_0001877/Sjc_0001878/Sjc_0008804/Sjc_0000190/Sjc_0000189
GO:0010609	mRNA localization resulting in post-transcriptional regulation of gene expression	16	0.822681	2.05118	0.00951049	0.189818	0.17669	570	tags=56%, list=6%, signal=53%	Sjc_0009528/Sjc_0002215/Sjc_0009527/Sjc_0009524/Sjc_0005604/Sjc_0009683/Sjc_0009515/Sjc_0005602/Sjc_0005857
GO:0016554	cytidine to uridine editing	16	0.822681	2.05118	0.00951049	0.189818	0.17669	570	tags=56%, list=6%, signal=53%	Sjc_0009528/Sjc_0002215/Sjc_0009527/Sjc_0009524/Sjc_0005604/Sjc_0009683/Sjc_0009515/Sjc_0005602/Sjc_0005857
GO:0006073	cellular glucan metabolic process	41	-0.526142	-1.67329	0.00951735	0.189818	0.17669	2315	tags=41%, list=26%, signal=31%	Sjc_0005965/Sjc_0004271/Sjc_0002746/Sjc_0001605/Sjc_0004692/Sjc_0001680/Sjc_0004729/Sjc_0002662/Sjc_0001642/Sjc_0000589/Sjc_0001934/Sjc_0003810/Sjc_0008801/Sjc_0008812/Sjc_0000590/Sjc_0007073/Sjc_0008906
GO:0044042	glucan metabolic process	41	-0.526142	-1.67329	0.00951735	0.189818	0.17669	2315	tags=41%, list=26%, signal=31%	Sjc_0005965/Sjc_0004271/Sjc_0002746/Sjc_0001605/Sjc_0004692/Sjc_0001680/Sjc_0004729/Sjc_0002662/Sjc_0001642/Sjc_0000589/Sjc_0001934/Sjc_0003810/Sjc_0008801/Sjc_0008812/Sjc_0000590/Sjc_0007073/Sjc_0008906
GO:0006402	mRNA catabolic process	197	-0.344774	-1.43186	0.00946867	0.189818	0.17669	1321	tags=26%, list=15%, signal=23%	Sjc_0004910/Sjc_0001696/Sjc_0000168/Sjc_0006699/Sjc_0007896/Sjc_0003038/Sjc_0001052/Sjc_0009429/Sjc_0001866/Sjc_0009131/Sjc_0006359/Sjc_0006480/Sjc_0004660/Sjc_0009060/Sjc_0000247/Sjc_0003103/Sjc_0005962/Sjc_0002600/Sjc_0005661/Sjc_0005111/Sjc_0007194/Sjc_0000854/Sjc_0000508/Sjc_0002514/Sjc_0001285/Sjc_0003223/Sjc_0008088/Sjc_0006439/Sjc_0000713/Sjc_0006436/Sjc_0002648/Sjc_0005797/Sjc_0002694/Sjc…
GO:0043484	regulation of RNA splicing	105	-0.41958	-1.57473	0.00956792	0.190015	0.176873	1866	tags=34%, list=21%, signal=27%	Sjc_0003543/Sjc_0000310/Sjc_0007645/Sjc_0002087/Sjc_0008986/Sjc_0008939/Sjc_0001592/Sjc_0001577/Sjc_0007144/Sjc_0007820/Sjc_0008814/Sjc_0002421/Sjc_0007272/Sjc_0001828/Sjc_0006499/Sjc_0007527/Sjc_0000111/Sjc_0006319/Sjc_0007715/Sjc_0001720/Sjc_0003799/Sjc_0000825/Sjc_0008447/Sjc_0003348/Sjc_0003223/Sjc_0001805/Sjc_0002694/Sjc_0004509/Sjc_0006119/Sjc_0003170/Sjc_0009285/Sjc_0003356/Sjc_0001346/Sjc…
GO:0006006	glucose metabolic process	79	-0.447416	-1.60392	0.00995275	0.19682	0.183207	1931	tags=37%, list=22%, signal=29%	Sjc_0008550/Sjc_0001329/Sjc_0003543/Sjc_0001680/Sjc_0001236/Sjc_0004633/Sjc_0007290/Sjc_0001169/Sjc_0002490/Sjc_0001890/Sjc_0009284/Sjc_0004929/Sjc_0001934/Sjc_0005974/Sjc_0003810/Sjc_0000303/Sjc_0008801/Sjc_0005478/Sjc_0003673/Sjc_0001512/Sjc_0005424/Sjc_0004045/Sjc_0002491/Sjc_0001904/Sjc_0001724/Sjc_0006464/Sjc_0007073/Sjc_0005423/Sjc_0008906
GO:0022411	cellular component disassembly	312	-0.309632	-1.3738	0.00999621	0.196845	0.18323	2592	tags=36%, list=29%, signal=26%	Sjc_0005216/Sjc_0009011/Sjc_0009052/Sjc_0006013/Sjc_0001702/Sjc_0006350/Sjc_0009244/Sjc_0008955/Sjc_0004551/Sjc_0006606/Sjc_0006927/Sjc_0002774/Sjc_0004785/Sjc_0001561/Sjc_0000829/Sjc_0003915/Sjc_0005965/Sjc_0000110/Sjc_0001092/Sjc_0004271/Sjc_0009360/Sjc_0001653/Sjc_0001716/Sjc_0003855/Sjc_0007632/Sjc_0006142/Sjc_0003841/Sjc_0003426/Sjc_0003838/Sjc_0004186/Sjc_0005301/Sjc_0007453/Sjc_0008898/Sjc…
GO:0043467	regulation of generation of precursor metabolites and energy	53	-0.485858	-1.61571	0.010129	0.197791	0.184111	1670	tags=25%, list=19%, signal=20%	Sjc_0001280/Sjc_0000785/Sjc_0005149/Sjc_0002490/Sjc_0001934/Sjc_0003810/Sjc_0002005/Sjc_0003673/Sjc_0002491/Sjc_0003515/Sjc_0007073/Sjc_0008906/Sjc_0007419
GO:0006790	sulfur compound metabolic process	123	-0.386783	-1.49526	0.0101268	0.197791	0.184111	1928	tags=33%, list=22%, signal=26%	Sjc_0003286/Sjc_0002609/Sjc_0007094/Sjc_0001329/Sjc_0000585/Sjc_0001937/Sjc_0003443/Sjc_0001236/Sjc_0008826/Sjc_0002388/Sjc_0002773/Sjc_0004707/Sjc_0001169/Sjc_0003115/Sjc_0007176/Sjc_0007032/Sjc_0002414/Sjc_0002485/Sjc_0004795/Sjc_0005974/Sjc_0005157/Sjc_0004169/Sjc_0009110/Sjc_0004570/Sjc_0003201/Sjc_0005414/Sjc_0006221/Sjc_0005231/Sjc_0000913/Sjc_0003021/Sjc_0002589/Sjc_0000647/Sjc_0007140/Sjc…
GO:0006941	striated muscle contraction	60	-0.473335	-1.61059	0.0104179	0.202585	0.188573	1743	tags=35%, list=20%, signal=28%	Sjc_0007065/Sjc_0004743/Sjc_0001680/Sjc_0007586/Sjc_0001293/Sjc_0001555/Sjc_0005072/Sjc_0005456/Sjc_0005006/Sjc_0001396/Sjc_0003673/Sjc_0005238/Sjc_0005810/Sjc_0008280/Sjc_0000256/Sjc_0001877/Sjc_0001878/Sjc_0001346/Sjc_0008804/Sjc_0000190/Sjc_0000189
GO:0098771	inorganic ion homeostasis	259	-0.325473	-1.40976	0.0105606	0.204507	0.190363	2138	tags=32%, list=24%, signal=25%	Sjc_0005261/Sjc_0003967/Sjc_0007543/Sjc_0004278/Sjc_0008111/Sjc_0008278/Sjc_0006041/Sjc_0005455/Sjc_0008920/Sjc_0003783/Sjc_0007424/Sjc_0001329/Sjc_0003147/Sjc_0003744/Sjc_0007013/Sjc_0002583/Sjc_0000816/Sjc_0008787/Sjc_0001236/Sjc_0006235/Sjc_0003938/Sjc_0006116/Sjc_0001555/Sjc_0001548/Sjc_0001318/Sjc_0006623/Sjc_0005149/Sjc_0002468/Sjc_0005072/Sjc_0007290/Sjc_0002388/Sjc_0004620/Sjc_0001841/Sjc…
GO:0002183	cytoplasmic translational initiation	20	-0.631338	-1.72269	0.0108584	0.206842	0.192536	886	tags=35%, list=10%, signal=32%	Sjc_0003183/Sjc_0006770/Sjc_0001000/Sjc_0001905/Sjc_0004023/Sjc_0005210/Sjc_0007218
GO:0033120	positive regulation of RNA splicing	21	-0.617677	-1.69121	0.0108175	0.206842	0.192536	500	tags=62%, list=6%, signal=59%	Sjc_0008293/Sjc_0000430/Sjc_0000305/Sjc_0008990/Sjc_0003150/Sjc_0001350/Sjc_0007645/Sjc_0008939/Sjc_0003348/Sjc_0009285/Sjc_0003356/Sjc_0001346/Sjc_0000306
GO:0060393	regulation of pathway-restricted SMAD protein phosphorylation	14	-0.667532	-1.66398	0.0108338	0.206842	0.192536	1772	tags=50%, list=20%, signal=40%	Sjc_0008077/Sjc_0007885/Sjc_0008074/Sjc_0007991/Sjc_0002847/Sjc_0008172/Sjc_0007728
GO:0042246	tissue regeneration	40	-0.523751	-1.6631	0.0108201	0.206842	0.192536	1450	tags=40%, list=16%, signal=34%	Sjc_0005072/Sjc_0006924/Sjc_0005428/Sjc_0008960/Sjc_0003306/Sjc_0000303/Sjc_0002935/Sjc_0000388/Sjc_0005424/Sjc_0008962/Sjc_0009705/Sjc_0008961/Sjc_0007067/Sjc_0009704/Sjc_0004714/Sjc_0005423
GO:1901292	nucleoside phosphate catabolic process	72	-0.452277	-1.59687	0.0109272	0.207306	0.192968	1335	tags=32%, list=15%, signal=27%	Sjc_0002490/Sjc_0004457/Sjc_0009284/Sjc_0001219/Sjc_0007880/Sjc_0005974/Sjc_0000303/Sjc_0008801/Sjc_0005478/Sjc_0003673/Sjc_0001512/Sjc_0002843/Sjc_0005424/Sjc_0004045/Sjc_0002491/Sjc_0001904/Sjc_0001979/Sjc_0000854/Sjc_0001759/Sjc_0002731/Sjc_0003515/Sjc_0006464/Sjc_0005423
GO:0005977	glycogen metabolic process	40	-0.521465	-1.65585	0.0111271	0.209395	0.194913	2315	tags=40%, list=26%, signal=30%	Sjc_0005965/Sjc_0004271/Sjc_0001605/Sjc_0004692/Sjc_0001680/Sjc_0004729/Sjc_0002662/Sjc_0001642/Sjc_0000589/Sjc_0001934/Sjc_0003810/Sjc_0008801/Sjc_0008812/Sjc_0000590/Sjc_0007073/Sjc_0008906
GO:0006112	energy reserve metabolic process	40	-0.521465	-1.65585	0.0111271	0.209395	0.194913	2315	tags=40%, list=26%, signal=30%	Sjc_0005965/Sjc_0004271/Sjc_0001605/Sjc_0004692/Sjc_0001680/Sjc_0004729/Sjc_0002662/Sjc_0001642/Sjc_0000589/Sjc_0001934/Sjc_0003810/Sjc_0008801/Sjc_0008812/Sjc_0000590/Sjc_0007073/Sjc_0008906
GO:0098901	regulation of cardiac muscle cell action potential	17	-0.677961	-1.77017	0.0114008	0.213165	0.198422	1612	tags=53%, list=18%, signal=43%	Sjc_0001555/Sjc_0005456/Sjc_0005006/Sjc_0005238/Sjc_0001877/Sjc_0001878/Sjc_0008804/Sjc_0000190/Sjc_0000189
GO:0043403	skeletal muscle tissue regeneration	14	-0.664191	-1.65565	0.0115708	0.213165	0.198422	1812	tags=57%, list=21%, signal=45%	Sjc_0004425/Sjc_0005072/Sjc_0006924/Sjc_0005428/Sjc_0000303/Sjc_0005424/Sjc_0004714/Sjc_0005423
GO:0000245	spliceosomal complex assembly	41	-0.520172	-1.6543	0.0115291	0.213165	0.198422	2284	tags=54%, list=26%, signal=40%	Sjc_0001350/Sjc_0003131/Sjc_0007165/Sjc_0000881/Sjc_0003373/Sjc_0000310/Sjc_0000559/Sjc_0001592/Sjc_0007272/Sjc_0007349/Sjc_0006499/Sjc_0001879/Sjc_0005922/Sjc_0002428/Sjc_0007619/Sjc_0003799/Sjc_0002401/Sjc_0003348/Sjc_0008229/Sjc_0003578/Sjc_0001346/Sjc_0005509
GO:1903900	regulation of viral life cycle	49	-0.499284	-1.62919	0.0115912	0.213165	0.198422	1985	tags=37%, list=23%, signal=29%	Sjc_0008920/Sjc_0003001/Sjc_0008449/Sjc_0008774/Sjc_0007778/Sjc_0006194/Sjc_0007144/Sjc_0005428/Sjc_0006499/Sjc_0006710/Sjc_0001137/Sjc_0008973/Sjc_0006700/Sjc_0003515/Sjc_0003432/Sjc_0006112/Sjc_0003431/Sjc_0008906
GO:1903707	negative regulation of hemopoiesis	54	-0.463974	-1.55255	0.0116015	0.213165	0.198422	1299	tags=30%, list=15%, signal=25%	Sjc_0005006/Sjc_0004960/Sjc_0008960/Sjc_0003306/Sjc_0005157/Sjc_0006710/Sjc_0002935/Sjc_0008962/Sjc_0002621/Sjc_0009705/Sjc_0008961/Sjc_0002622/Sjc_0001805/Sjc_0009704/Sjc_0008892/Sjc_0007419
GO:0006401	RNA catabolic process	218	-0.348336	-1.46069	0.0115177	0.213165	0.198422	1321	tags=26%, list=15%, signal=22%	Sjc_0004910/Sjc_0001696/Sjc_0000168/Sjc_0006699/Sjc_0007896/Sjc_0003791/Sjc_0003038/Sjc_0001052/Sjc_0009429/Sjc_0001866/Sjc_0009131/Sjc_0006359/Sjc_0006480/Sjc_0004660/Sjc_0002817/Sjc_0009060/Sjc_0000247/Sjc_0003103/Sjc_0005962/Sjc_0002600/Sjc_0005661/Sjc_0005111/Sjc_0007194/Sjc_0000854/Sjc_0000508/Sjc_0002514/Sjc_0001285/Sjc_0003223/Sjc_0008088/Sjc_0006439/Sjc_0000713/Sjc_0006436/Sjc_0002648/Sjc…
GO:1901224	positive regulation of NIK/NF-kappaB signaling	19	-0.604601	-1.63053	0.0117955	0.215184	0.200301	1670	tags=58%, list=19%, signal=47%	Sjc_0001280/Sjc_0000731/Sjc_0007343/Sjc_0008960/Sjc_0003306/Sjc_0002935/Sjc_0008962/Sjc_0002791/Sjc_0009705/Sjc_0008961/Sjc_0009704
GO:0007005	mitochondrion organization	282	-0.307545	-1.35005	0.0118035	0.215184	0.200301	2726	tags=41%, list=31%, signal=29%	Sjc_0006985/Sjc_0007954/Sjc_0006717/Sjc_0000625/Sjc_0008544/Sjc_0000941/Sjc_0004802/Sjc_0003305/Sjc_0001472/Sjc_0008192/Sjc_0009011/Sjc_0000253/Sjc_0007211/Sjc_0001589/Sjc_0006013/Sjc_0009244/Sjc_0009033/Sjc_0004525/Sjc_0004115/Sjc_0004722/Sjc_0001561/Sjc_0006713/Sjc_0006409/Sjc_0005965/Sjc_0007060/Sjc_0004758/Sjc_0004754/Sjc_0000727/Sjc_0004271/Sjc_0001716/Sjc_0005369/Sjc_0004253/Sjc_0001074/Sjc…
GO:0006637	acyl-CoA metabolic process	37	-0.511068	-1.5958	0.0120183	0.217402	0.202365	1880	tags=43%, list=21%, signal=34%	Sjc_0001329/Sjc_0000585/Sjc_0001236/Sjc_0002773/Sjc_0003115/Sjc_0007032/Sjc_0002485/Sjc_0005974/Sjc_0009110/Sjc_0004570/Sjc_0005414/Sjc_0006221/Sjc_0003021/Sjc_0007140/Sjc_0003114/Sjc_0001507
GO:0035383	thioester metabolic process	37	-0.511068	-1.5958	0.0120183	0.217402	0.202365	1880	tags=43%, list=21%, signal=34%	Sjc_0001329/Sjc_0000585/Sjc_0001236/Sjc_0002773/Sjc_0003115/Sjc_0007032/Sjc_0002485/Sjc_0005974/Sjc_0009110/Sjc_0004570/Sjc_0005414/Sjc_0006221/Sjc_0003021/Sjc_0007140/Sjc_0003114/Sjc_0001507
GO:0061061	muscle structure development	346	-0.305061	-1.36471	0.0123279	0.222139	0.206775	2076	tags=29%, list=24%, signal=23%	Sjc_0001682/Sjc_0005328/Sjc_0004186/Sjc_0007744/Sjc_0005455/Sjc_0007453/Sjc_0008898/Sjc_0004936/Sjc_0003654/Sjc_0003769/Sjc_0003147/Sjc_0009205/Sjc_0004425/Sjc_0001474/Sjc_0007065/Sjc_0004743/Sjc_0004633/Sjc_0001554/Sjc_0008986/Sjc_0001280/Sjc_0005043/Sjc_0001555/Sjc_0005051/Sjc_0001318/Sjc_0002069/Sjc_0003013/Sjc_0006159/Sjc_0004117/Sjc_0003651/Sjc_0001712/Sjc_0004657/Sjc_0000731/Sjc_0006806/Sjc…
GO:0030641	regulation of cellular pH	46	-0.494603	-1.60268	0.012406	0.222688	0.207286	2047	tags=46%, list=23%, signal=35%	Sjc_0008111/Sjc_0006041/Sjc_0003783/Sjc_0000816/Sjc_0006116/Sjc_0004620/Sjc_0001824/Sjc_0007335/Sjc_0000770/Sjc_0007951/Sjc_0005299/Sjc_0002485/Sjc_0002996/Sjc_0009118/Sjc_0006670/Sjc_0009120/Sjc_0008547/Sjc_0001790/Sjc_0005874/Sjc_0007207/Sjc_0000272
GO:0006633	fatty acid biosynthetic process	52	-0.466463	-1.54535	0.0124576	0.222757	0.20735	1963	tags=35%, list=22%, signal=27%	Sjc_0004740/Sjc_0001329/Sjc_0009112/Sjc_0001236/Sjc_0002773/Sjc_0002490/Sjc_0001901/Sjc_0006577/Sjc_0004471/Sjc_0004929/Sjc_0009110/Sjc_0006221/Sjc_0002491/Sjc_0007728/Sjc_0008018/Sjc_0001389/Sjc_0006587/Sjc_0001388
GO:0019359	nicotinamide nucleotide biosynthetic process	48	-0.485178	-1.57415	0.0126176	0.223267	0.207825	1344	tags=31%, list=15%, signal=27%	Sjc_0001169/Sjc_0002490/Sjc_0005974/Sjc_0000303/Sjc_0008801/Sjc_0005478/Sjc_0003673/Sjc_0001512/Sjc_0005424/Sjc_0004045/Sjc_0002491/Sjc_0001904/Sjc_0006464/Sjc_0001632/Sjc_0005423
GO:0019363	pyridine nucleotide biosynthetic process	48	-0.485178	-1.57415	0.0126176	0.223267	0.207825	1344	tags=31%, list=15%, signal=27%	Sjc_0001169/Sjc_0002490/Sjc_0005974/Sjc_0000303/Sjc_0008801/Sjc_0005478/Sjc_0003673/Sjc_0001512/Sjc_0005424/Sjc_0004045/Sjc_0002491/Sjc_0001904/Sjc_0006464/Sjc_0001632/Sjc_0005423
GO:1901137	carbohydrate derivative biosynthetic process	314	-0.302853	-1.34455	0.0126296	0.223267	0.207825	1927	tags=30%, list=22%, signal=24%	Sjc_0001147/Sjc_0005716/Sjc_0006211/Sjc_0007399/Sjc_0004206/Sjc_0001329/Sjc_0004453/Sjc_0008039/Sjc_0006105/Sjc_0003570/Sjc_0007525/Sjc_0007774/Sjc_0001236/Sjc_0005043/Sjc_0007098/Sjc_0008644/Sjc_0002830/Sjc_0006116/Sjc_0002661/Sjc_0002818/Sjc_0006017/Sjc_0008321/Sjc_0005387/Sjc_0003314/Sjc_0003096/Sjc_0001594/Sjc_0001993/Sjc_0009374/Sjc_0009292/Sjc_0002773/Sjc_0003914/Sjc_0005342/Sjc_0006132/Sjc…
GO:0000027	ribosomal large subunit assembly	25	-0.593372	-1.69415	0.0128054	0.225439	0.209847	2163	tags=56%, list=25%, signal=42%	Sjc_0003440/Sjc_0008746/Sjc_0002599/Sjc_0002913/Sjc_0002651/Sjc_0001577/Sjc_0000919/Sjc_0003536/Sjc_0000247/Sjc_0001058/Sjc_0002648/Sjc_0008418/Sjc_0007923/Sjc_0002110
GO:1903362	regulation of cellular protein catabolic process	164	-0.358258	-1.44877	0.0128491	0.225439	0.209847	1882	tags=30%, list=21%, signal=24%	Sjc_0008232/Sjc_0004985/Sjc_0005254/Sjc_0000997/Sjc_0006101/Sjc_0005536/Sjc_0000227/Sjc_0003996/Sjc_0005887/Sjc_0008263/Sjc_0005935/Sjc_0007687/Sjc_0003931/Sjc_0002835/Sjc_0007144/Sjc_0005677/Sjc_0009374/Sjc_0001372/Sjc_0006453/Sjc_0003038/Sjc_0001299/Sjc_0000150/Sjc_0007176/Sjc_0005286/Sjc_0003232/Sjc_0004294/Sjc_0006099/Sjc_0004987/Sjc_0007209/Sjc_0008172/Sjc_0000927/Sjc_0004419/Sjc_0005432/Sjc…
GO:1902106	negative regulation of leukocyte differentiation	31	-0.569547	-1.70857	0.0130766	0.228571	0.212762	1185	tags=35%, list=13%, signal=31%	Sjc_0004960/Sjc_0008960/Sjc_0003306/Sjc_0006710/Sjc_0002935/Sjc_0008962/Sjc_0009705/Sjc_0008961/Sjc_0009704/Sjc_0008892/Sjc_0007419
GO:0060548	negative regulation of cell death	407	-0.286436	-1.30533	0.0134293	0.233861	0.217686	1851	tags=26%, list=21%, signal=21%	Sjc_0006105/Sjc_0003744/Sjc_0005348/Sjc_0007161/Sjc_0002583/Sjc_0003644/Sjc_0005242/Sjc_0006613/Sjc_0001236/Sjc_0001293/Sjc_0001685/Sjc_0003148/Sjc_0008774/Sjc_0003938/Sjc_0001280/Sjc_0008387/Sjc_0003523/Sjc_0003996/Sjc_0000042/Sjc_0001318/Sjc_0008263/Sjc_0002661/Sjc_0000369/Sjc_0001254/Sjc_0000643/Sjc_0000731/Sjc_0002835/Sjc_0007144/Sjc_0002388/Sjc_0000668/Sjc_0005677/Sjc_0007340/Sjc_0003914/Sjc…
GO:1901222	regulation of NIK/NF-kappaB signaling	26	-0.587165	-1.70667	0.0136734	0.237226	0.220819	1670	tags=50%, list=19%, signal=41%	Sjc_0001280/Sjc_0000731/Sjc_0007343/Sjc_0008960/Sjc_0004929/Sjc_0003306/Sjc_0002935/Sjc_0008962/Sjc_0002791/Sjc_0009705/Sjc_0008961/Sjc_0003599/Sjc_0009704
GO:0032881	regulation of polysaccharide metabolic process	13	-0.685944	-1.71144	0.0138136	0.238771	0.222256	989	tags=31%, list=11%, signal=27%	Sjc_0001934/Sjc_0003810/Sjc_0007073/Sjc_0008906
GO:0034764	positive regulation of transmembrane transport	87	-0.427788	-1.55873	0.0139987	0.241077	0.224403	1344	tags=28%, list=15%, signal=24%	Sjc_0001169/Sjc_0002490/Sjc_0005456/Sjc_0005006/Sjc_0000033/Sjc_0008960/Sjc_0004471/Sjc_0004929/Sjc_0003306/Sjc_0002935/Sjc_0008962/Sjc_0002491/Sjc_0001284/Sjc_0003767/Sjc_0006700/Sjc_0008280/Sjc_0009705/Sjc_0001877/Sjc_0008961/Sjc_0009704/Sjc_0000272/Sjc_0001878/Sjc_0008804/Sjc_0000189
GO:0046755	viral budding	16	-0.643679	-1.65305	0.0140765	0.241526	0.224821	2535	tags=56%, list=29%, signal=40%	Sjc_0001702/Sjc_0003677/Sjc_0003915/Sjc_0005361/Sjc_0005113/Sjc_0008774/Sjc_0005748/Sjc_0006112/Sjc_0005357
GO:0000920	septum digestion after cytokinesis	13	-0.684088	-1.70681	0.0143862	0.241646	0.224932	2535	tags=69%, list=29%, signal=49%	Sjc_0001702/Sjc_0003915/Sjc_0005361/Sjc_0005113/Sjc_0008774/Sjc_0006474/Sjc_0005748/Sjc_0006112/Sjc_0005357
GO:0038061	NIK/NF-kappaB signaling	31	-0.565866	-1.69753	0.0143146	0.241646	0.224932	1670	tags=48%, list=19%, signal=39%	Sjc_0001280/Sjc_0000731/Sjc_0003074/Sjc_0007343/Sjc_0008960/Sjc_0004929/Sjc_0003306/Sjc_0002935/Sjc_0003073/Sjc_0008962/Sjc_0002791/Sjc_0009705/Sjc_0008961/Sjc_0003599/Sjc_0009704
GO:0060389	pathway-restricted SMAD protein phosphorylation	15	-0.63733	-1.60172	0.0143661	0.241646	0.224932	1772	tags=47%, list=20%, signal=37%	Sjc_0008077/Sjc_0007885/Sjc_0008074/Sjc_0007991/Sjc_0002847/Sjc_0008172/Sjc_0007728
GO:0051896	regulation of protein kinase B signaling	60	-0.461019	-1.56868	0.0143941	0.241646	0.224932	1150	tags=25%, list=13%, signal=22%	Sjc_0008960/Sjc_0005286/Sjc_0003306/Sjc_0000028/Sjc_0002935/Sjc_0005445/Sjc_0008962/Sjc_0005447/Sjc_0007728/Sjc_0002621/Sjc_0009705/Sjc_0008961/Sjc_0002622/Sjc_0009704/Sjc_0008906
GO:0035249	synaptic transmission, glutamatergic	52	-0.459694	-1.52292	0.0141599	0.241646	0.224932	1600	tags=33%, list=18%, signal=27%	Sjc_0007723/Sjc_0006806/Sjc_0005072/Sjc_0001590/Sjc_0008960/Sjc_0001274/Sjc_0003306/Sjc_0002935/Sjc_0005238/Sjc_0008962/Sjc_0002621/Sjc_0009705/Sjc_0008961/Sjc_0002622/Sjc_0009704/Sjc_0006170/Sjc_0000190
GO:1901293	nucleoside phosphate biosynthetic process	182	-0.355069	-1.45987	0.0143217	0.241646	0.224932	1526	tags=29%, list=17%, signal=24%	Sjc_0005387/Sjc_0003314/Sjc_0003651/Sjc_0003096/Sjc_0001594/Sjc_0005500/Sjc_0009292/Sjc_0002773/Sjc_0003914/Sjc_0001169/Sjc_0002490/Sjc_0003115/Sjc_0004135/Sjc_0006808/Sjc_0000770/Sjc_0007032/Sjc_0002485/Sjc_0005974/Sjc_0002313/Sjc_0000416/Sjc_0003792/Sjc_0006862/Sjc_0009110/Sjc_0000303/Sjc_0008801/Sjc_0005478/Sjc_0000468/Sjc_0006670/Sjc_0003673/Sjc_0001512/Sjc_0005414/Sjc_0007528/Sjc_0005424/Sjc…
GO:1901607	alpha-amino acid biosynthetic process	28	-0.568208	-1.6868	0.0146989	0.245878	0.228872	2416	tags=57%, list=27%, signal=42%	Sjc_0006681/Sjc_0006409/Sjc_0004909/Sjc_0008550/Sjc_0002609/Sjc_0006235/Sjc_0000785/Sjc_0003061/Sjc_0002856/Sjc_0007290/Sjc_0004916/Sjc_0007821/Sjc_0000388/Sjc_0002589/Sjc_0006237/Sjc_0006467
GO:0039702	viral budding via host ESCRT complex	13	-0.680207	-1.69713	0.0151047	0.251763	0.23435	2535	tags=62%, list=29%, signal=44%	Sjc_0001702/Sjc_0003677/Sjc_0003915/Sjc_0005361/Sjc_0008774/Sjc_0005748/Sjc_0006112/Sjc_0005357
GO:0060074	synapse maturation	28	-0.566235	-1.68094	0.015281	0.253357	0.235834	1150	tags=39%, list=13%, signal=34%	Sjc_0008960/Sjc_0003306/Sjc_0002935/Sjc_0001688/Sjc_0004419/Sjc_0008962/Sjc_0009705/Sjc_0008961/Sjc_0009704/Sjc_0009285/Sjc_0000306
GO:1903050	regulation of proteolysis involved in cellular protein catabolic process	150	-0.372351	-1.47686	0.0153089	0.253357	0.235834	1645	tags=29%, list=19%, signal=24%	Sjc_0005536/Sjc_0000227/Sjc_0003996/Sjc_0005887/Sjc_0008263/Sjc_0005935/Sjc_0007687/Sjc_0003931/Sjc_0002835/Sjc_0007144/Sjc_0005677/Sjc_0009374/Sjc_0001372/Sjc_0006453/Sjc_0003038/Sjc_0001299/Sjc_0000150/Sjc_0007176/Sjc_0005286/Sjc_0003232/Sjc_0004294/Sjc_0004987/Sjc_0007209/Sjc_0008172/Sjc_0000927/Sjc_0004419/Sjc_0005432/Sjc_0007728/Sjc_0008490/Sjc_0002621/Sjc_0005239/Sjc_0008484/Sjc_0003515/Sjc…
GO:0016553	base conversion or substitution editing	17	0.81198	2.04392	0.015534	0.256173	0.238455	570	tags=53%, list=6%, signal=50%	Sjc_0009528/Sjc_0002215/Sjc_0009527/Sjc_0009524/Sjc_0005604/Sjc_0009683/Sjc_0009515/Sjc_0005602/Sjc_0005857
GO:0010259	multicellular organism aging	244	-0.323762	-1.38416	0.0156336	0.256909	0.23914	2051	tags=32%, list=23%, signal=25%	Sjc_0007744/Sjc_0003171/Sjc_0009475/Sjc_0005455/Sjc_0003060/Sjc_0003654/Sjc_0001406/Sjc_0005464/Sjc_0008039/Sjc_0008858/Sjc_0009205/Sjc_0003744/Sjc_0007161/Sjc_0003327/Sjc_0000172/Sjc_0002087/Sjc_0007885/Sjc_0002191/Sjc_0001555/Sjc_0006182/Sjc_0008939/Sjc_0002146/Sjc_0002913/Sjc_0001254/Sjc_0003096/Sjc_0002388/Sjc_0002490/Sjc_0005456/Sjc_0001696/Sjc_0001642/Sjc_0005006/Sjc_0007523/Sjc_0008114/Sjc…
GO:0046716	muscle cell cellular homeostasis	24	-0.554518	-1.56683	0.0157563	0.258017	0.240172	1731	tags=42%, list=20%, signal=34%	Sjc_0001680/Sjc_0007167/Sjc_0003556/Sjc_0005286/Sjc_0008801/Sjc_0005478/Sjc_0006627/Sjc_0003767/Sjc_0003515/Sjc_0008906
GO:0006023	aminoglycan biosynthetic process	23	-0.583957	-1.64051	0.015932	0.259075	0.241156	187	tags=13%, list=2%, signal=13%	Sjc_0006882/Sjc_0006881/Sjc_0003316
GO:0006814	sodium ion transport	92	-0.417961	-1.53806	0.0159145	0.259075	0.241156	1450	tags=29%, list=16%, signal=25%	Sjc_0005072/Sjc_0005151/Sjc_0001590/Sjc_0003094/Sjc_0004304/Sjc_0008671/Sjc_0009770/Sjc_0004116/Sjc_0001396/Sjc_0009118/Sjc_0009120/Sjc_0001790/Sjc_0003673/Sjc_0005238/Sjc_0001284/Sjc_0008280/Sjc_0005961/Sjc_0006635/Sjc_0006237/Sjc_0001430/Sjc_0001151/Sjc_0006170/Sjc_0002632/Sjc_0005766/Sjc_0000190/Sjc_0004409/Sjc_0000189
GO:0007035	vacuolar acidification	19	-0.594113	-1.60224	0.0160505	0.260097	0.242107	1377	tags=53%, list=16%, signal=44%	Sjc_0004620/Sjc_0000770/Sjc_0007951/Sjc_0005299/Sjc_0002485/Sjc_0002996/Sjc_0008547/Sjc_0005874/Sjc_0007207/Sjc_0000272
GO:0055080	cation homeostasis	258	-0.32679	-1.4139	0.0161415	0.260666	0.242638	2138	tags=32%, list=24%, signal=25%	Sjc_0005261/Sjc_0003967/Sjc_0007543/Sjc_0004278/Sjc_0008111/Sjc_0008278/Sjc_0006041/Sjc_0005455/Sjc_0008920/Sjc_0003783/Sjc_0007424/Sjc_0001329/Sjc_0003147/Sjc_0003744/Sjc_0007013/Sjc_0002583/Sjc_0000816/Sjc_0008787/Sjc_0001236/Sjc_0006235/Sjc_0003938/Sjc_0006116/Sjc_0001555/Sjc_0001548/Sjc_0001318/Sjc_0006623/Sjc_0005149/Sjc_0002468/Sjc_0005072/Sjc_0007290/Sjc_0002388/Sjc_0004620/Sjc_0001841/Sjc…
GO:0071320	cellular response to cAMP	27	-0.544451	-1.59867	0.0165075	0.264744	0.246433	1136	tags=37%, list=13%, signal=32%	Sjc_0009284/Sjc_0006480/Sjc_0001396/Sjc_0003673/Sjc_0005238/Sjc_0008280/Sjc_0004023/Sjc_0009411/Sjc_0000190/Sjc_0000189
GO:0001889	liver development	102	-0.400186	-1.50187	0.0164943	0.264744	0.246433	1812	tags=38%, list=21%, signal=31%	Sjc_0004425/Sjc_0008077/Sjc_0001293/Sjc_0003996/Sjc_0003300/Sjc_0008074/Sjc_0000731/Sjc_0007991/Sjc_0002388/Sjc_0009249/Sjc_0001890/Sjc_0008261/Sjc_0008960/Sjc_0009284/Sjc_0003371/Sjc_0009260/Sjc_0003306/Sjc_0000303/Sjc_0002935/Sjc_0001467/Sjc_0000036/Sjc_0005424/Sjc_0008962/Sjc_0007728/Sjc_0007228/Sjc_0001979/Sjc_0008280/Sjc_0001759/Sjc_0009705/Sjc_0008961/Sjc_0007876/Sjc_0009704/Sjc_0008812/Sjc…
GO:0036071	N-glycan fucosylation	14	0.705786	1.71884	0.0167068	0.265142	0.246804	1054	tags=43%, list=12%, signal=38%	Sjc_0002471/Sjc_0004542/Sjc_0002469/Sjc_0002470/Sjc_0005903/Sjc_0007787
GO:2000142	regulation of DNA-templated transcription, initiation	27	-0.543811	-1.59679	0.0168049	0.265142	0.246804	1886	tags=56%, list=21%, signal=44%	Sjc_0009584/Sjc_0004561/Sjc_0000227/Sjc_0000876/Sjc_0006453/Sjc_0001828/Sjc_0001299/Sjc_0004294/Sjc_0003971/Sjc_0005559/Sjc_0007715/Sjc_0000927/Sjc_0001720/Sjc_0006212/Sjc_0001346
GO:0014037	Schwann cell differentiation	27	-0.543664	-1.59636	0.0168049	0.265142	0.246804	1150	tags=41%, list=13%, signal=36%	Sjc_0003651/Sjc_0008960/Sjc_0001274/Sjc_0003306/Sjc_0002935/Sjc_0008962/Sjc_0009705/Sjc_0008961/Sjc_0007982/Sjc_0000760/Sjc_0009704
GO:0098754	detoxification	38	-0.50033	-1.56294	0.0167449	0.265142	0.246804	1428	tags=34%, list=16%, signal=29%	Sjc_0002388/Sjc_0001841/Sjc_0006577/Sjc_0003836/Sjc_0008539/Sjc_0004169/Sjc_0000647/Sjc_0005875/Sjc_0002015/Sjc_0006542/Sjc_0005754/Sjc_0008538/Sjc_0002499
GO:0048024	regulation of mRNA splicing, via spliceosome	85	-0.427002	-1.5435	0.0168164	0.265142	0.246804	1859	tags=35%, list=21%, signal=28%	Sjc_0000310/Sjc_0007645/Sjc_0002087/Sjc_0008986/Sjc_0008939/Sjc_0001592/Sjc_0001577/Sjc_0007144/Sjc_0007820/Sjc_0008814/Sjc_0002421/Sjc_0007272/Sjc_0001828/Sjc_0006499/Sjc_0007527/Sjc_0007715/Sjc_0001720/Sjc_0003799/Sjc_0000825/Sjc_0003348/Sjc_0003223/Sjc_0001805/Sjc_0004509/Sjc_0003170/Sjc_0009285/Sjc_0003356/Sjc_0001346/Sjc_0000306/Sjc_0006712/Sjc_0005509
GO:0048025	negative regulation of mRNA splicing, via spliceosome	20	-0.607056	-1.65644	0.0173088	0.267484	0.248984	1581	tags=45%, list=18%, signal=37%	Sjc_0008939/Sjc_0008814/Sjc_0001828/Sjc_0003799/Sjc_0003348/Sjc_0003223/Sjc_0009285/Sjc_0000306/Sjc_0006712
GO:0006458	'de novo' protein folding	25	-0.572499	-1.63456	0.0173088	0.267484	0.248984	1639	tags=76%, list=19%, signal=62%	Sjc_0006819/Sjc_0005142/Sjc_0007699/Sjc_0004802/Sjc_0006064/Sjc_0005957/Sjc_0004253/Sjc_0005339/Sjc_0001060/Sjc_0006916/Sjc_0006899/Sjc_0002859/Sjc_0005700/Sjc_0006495/Sjc_0004114/Sjc_0009146/Sjc_0004074/Sjc_0005426/Sjc_0000760
GO:0006353	DNA-templated transcription, termination	40	-0.499579	-1.58635	0.0171201	0.267484	0.248984	2427	tags=38%, list=28%, signal=27%	Sjc_0008157/Sjc_0007760/Sjc_0000586/Sjc_0001128/Sjc_0007547/Sjc_0003898/Sjc_0002661/Sjc_0005333/Sjc_0005922/Sjc_0003467/Sjc_0007619/Sjc_0008386/Sjc_0004895/Sjc_0008229/Sjc_0007970
GO:0000041	transition metal ion transport	52	-0.45258	-1.49935	0.0172625	0.267484	0.248984	1060	tags=27%, list=12%, signal=24%	Sjc_0003836/Sjc_0008820/Sjc_0007951/Sjc_0006582/Sjc_0004664/Sjc_0006710/Sjc_0006931/Sjc_0006581/Sjc_0005249/Sjc_0006700/Sjc_0007207/Sjc_0001877/Sjc_0000272/Sjc_0001878
GO:0046434	organophosphate catabolic process	104	-0.396258	-1.4831	0.0172516	0.267484	0.248984	1335	tags=28%, list=15%, signal=24%	Sjc_0002490/Sjc_0004457/Sjc_0001559/Sjc_0009284/Sjc_0001219/Sjc_0005286/Sjc_0007880/Sjc_0005974/Sjc_0000303/Sjc_0008801/Sjc_0005478/Sjc_0003673/Sjc_0001512/Sjc_0005445/Sjc_0002843/Sjc_0005424/Sjc_0003296/Sjc_0004045/Sjc_0005447/Sjc_0002491/Sjc_0001904/Sjc_0001979/Sjc_0000854/Sjc_0001759/Sjc_0002731/Sjc_0003515/Sjc_0006464/Sjc_0002573/Sjc_0005423
GO:0070646	protein modification by small protein removal	136	-0.369275	-1.45101	0.0171307	0.267484	0.248984	1804	tags=31%, list=21%, signal=25%	Sjc_0005848/Sjc_0005154/Sjc_0005254/Sjc_0005246/Sjc_0000172/Sjc_0001280/Sjc_0000785/Sjc_0000227/Sjc_0005887/Sjc_0005935/Sjc_0006146/Sjc_0009452/Sjc_0007687/Sjc_0002578/Sjc_0009010/Sjc_0001372/Sjc_0006453/Sjc_0000969/Sjc_0007185/Sjc_0001299/Sjc_0000150/Sjc_0009753/Sjc_0004294/Sjc_0006686/Sjc_0004172/Sjc_0007209/Sjc_0009055/Sjc_0001467/Sjc_0000927/Sjc_0003851/Sjc_0005343/Sjc_0002484/Sjc_0008991/Sjc…
GO:0006812	cation transport	446	-0.286017	-1.30528	0.0174587	0.26891	0.250311	1722	tags=28%, list=20%, signal=23%	Sjc_0009315/Sjc_0006613/Sjc_0001293/Sjc_0006235/Sjc_0001280/Sjc_0006116/Sjc_0002191/Sjc_0007942/Sjc_0001555/Sjc_0001548/Sjc_0008726/Sjc_0007202/Sjc_0001318/Sjc_0003533/Sjc_0006623/Sjc_0005149/Sjc_0008826/Sjc_0002468/Sjc_0005387/Sjc_0003314/Sjc_0000931/Sjc_0003096/Sjc_0005072/Sjc_0005151/Sjc_0007144/Sjc_0009292/Sjc_0004620/Sjc_0009167/Sjc_0001169/Sjc_0001590/Sjc_0005456/Sjc_0003801/Sjc_0003094/Sjc…
GO:0072525	pyridine-containing compound biosynthetic process	50	-0.472597	-1.55357	0.0175735	0.269464	0.250827	1344	tags=30%, list=15%, signal=26%	Sjc_0001169/Sjc_0002490/Sjc_0005974/Sjc_0000303/Sjc_0008801/Sjc_0005478/Sjc_0003673/Sjc_0001512/Sjc_0005424/Sjc_0004045/Sjc_0002491/Sjc_0001904/Sjc_0006464/Sjc_0001632/Sjc_0005423
GO:0021795	cerebral cortex cell migration	37	-0.494155	-1.54298	0.0176102	0.269464	0.250827	1150	tags=32%, list=13%, signal=28%	Sjc_0008960/Sjc_0001274/Sjc_0003306/Sjc_0002935/Sjc_0004419/Sjc_0008962/Sjc_0006627/Sjc_0002621/Sjc_0009705/Sjc_0008961/Sjc_0002622/Sjc_0009704
GO:0071985	multivesicular body sorting pathway	30	-0.559789	-1.67956	0.0178391	0.270862	0.252128	1962	tags=47%, list=22%, signal=36%	Sjc_0004936/Sjc_0005113/Sjc_0000816/Sjc_0008774/Sjc_0002823/Sjc_0003121/Sjc_0003916/Sjc_0002978/Sjc_0002803/Sjc_0002538/Sjc_0001942/Sjc_0003515/Sjc_0005748/Sjc_0006112
GO:0006749	glutathione metabolic process	20	-0.600195	-1.63772	0.0179108	0.270862	0.252128	1428	tags=40%, list=16%, signal=34%	Sjc_0002388/Sjc_0001169/Sjc_0007176/Sjc_0002414/Sjc_0004795/Sjc_0004169/Sjc_0000647/Sjc_0002015
GO:0019068	virion assembly	21	-0.596407	-1.63297	0.0177888	0.270862	0.252128	2535	tags=48%, list=29%, signal=34%	Sjc_0001702/Sjc_0003677/Sjc_0003915/Sjc_0005361/Sjc_0005113/Sjc_0007161/Sjc_0008774/Sjc_0005748/Sjc_0006112/Sjc_0005357
GO:0045834	positive regulation of lipid metabolic process	65	-0.429121	-1.48767	0.0179336	0.270862	0.252128	1345	tags=26%, list=15%, signal=22%	Sjc_0000271/Sjc_0002490/Sjc_0008960/Sjc_0001648/Sjc_0004929/Sjc_0003306/Sjc_0000468/Sjc_0002935/Sjc_0008962/Sjc_0002491/Sjc_0007728/Sjc_0002621/Sjc_0009705/Sjc_0008961/Sjc_0002622/Sjc_0009704/Sjc_0008906
GO:0034123	positive regulation of toll-like receptor signaling pathway	11	-0.695037	-1.66693	0.0187705	0.28182	0.262328	1636	tags=55%, list=19%, signal=44%	Sjc_0005370/Sjc_0009208/Sjc_0005935/Sjc_0002174/Sjc_0006710/Sjc_0005934
GO:0006885	regulation of pH	53	-0.453547	-1.50826	0.0187799	0.28182	0.262328	2047	tags=45%, list=23%, signal=35%	Sjc_0008111/Sjc_0008278/Sjc_0006041/Sjc_0003783/Sjc_0001329/Sjc_0000816/Sjc_0001236/Sjc_0006116/Sjc_0004620/Sjc_0001824/Sjc_0007335/Sjc_0000770/Sjc_0007951/Sjc_0005299/Sjc_0002485/Sjc_0002996/Sjc_0009118/Sjc_0006670/Sjc_0009120/Sjc_0008547/Sjc_0001790/Sjc_0005874/Sjc_0007207/Sjc_0000272
GO:0030104	water homeostasis	29	-0.537282	-1.60414	0.0189955	0.284141	0.264489	2635	tags=48%, list=30%, signal=34%	Sjc_0006689/Sjc_0009408/Sjc_0004401/Sjc_0009407/Sjc_0006904/Sjc_0005455/Sjc_0002955/Sjc_0001555/Sjc_0009409/Sjc_0005456/Sjc_0002794/Sjc_0003375/Sjc_0009411/Sjc_0004409
GO:0061008	hepaticobiliary system development	105	-0.389409	-1.4615	0.0192303	0.286735	0.266903	1812	tags=37%, list=21%, signal=30%	Sjc_0004425/Sjc_0008077/Sjc_0001293/Sjc_0003996/Sjc_0003300/Sjc_0008074/Sjc_0000731/Sjc_0007991/Sjc_0002388/Sjc_0009249/Sjc_0001890/Sjc_0008261/Sjc_0008960/Sjc_0009284/Sjc_0003371/Sjc_0009260/Sjc_0003306/Sjc_0000303/Sjc_0002935/Sjc_0001467/Sjc_0000036/Sjc_0005424/Sjc_0008962/Sjc_0007728/Sjc_0007228/Sjc_0001979/Sjc_0008280/Sjc_0001759/Sjc_0009705/Sjc_0008961/Sjc_0007876/Sjc_0009704/Sjc_0008812/Sjc…
GO:0007130	synaptonemal complex assembly	13	0.793322	1.88065	0.0197098	0.288461	0.268509	860	tags=31%, list=10%, signal=28%	Sjc_0004478/Sjc_0004313/Sjc_0002314/Sjc_0003197
GO:0010907	positive regulation of glucose metabolic process	17	-0.637233	-1.66383	0.0196619	0.288461	0.268509	1335	tags=41%, list=15%, signal=35%	Sjc_0002490/Sjc_0009284/Sjc_0001934/Sjc_0003810/Sjc_0002491/Sjc_0007073/Sjc_0008906
GO:0043586	tongue development	17	-0.636482	-1.66187	0.0196619	0.288461	0.268509	1150	tags=47%, list=13%, signal=41%	Sjc_0008960/Sjc_0003306/Sjc_0002935/Sjc_0008962/Sjc_0009705/Sjc_0008961/Sjc_0009704/Sjc_0007419
GO:0051968	positive regulation of synaptic transmission, glutamatergic	20	-0.594633	-1.62254	0.0197169	0.288461	0.268509	1458	tags=50%, list=17%, signal=42%	Sjc_0006806/Sjc_0008960/Sjc_0003306/Sjc_0002935/Sjc_0008962/Sjc_0002621/Sjc_0009705/Sjc_0008961/Sjc_0002622/Sjc_0009704
GO:0050727	regulation of inflammatory response	65	-0.426547	-1.47875	0.0195492	0.288461	0.268509	1456	tags=34%, list=17%, signal=28%	Sjc_0007202/Sjc_0002437/Sjc_0001696/Sjc_0007343/Sjc_0000033/Sjc_0008960/Sjc_0003038/Sjc_0001313/Sjc_0005700/Sjc_0006686/Sjc_0003306/Sjc_0002935/Sjc_0003246/Sjc_0008962/Sjc_0008991/Sjc_0000623/Sjc_0001979/Sjc_0002015/Sjc_0009705/Sjc_0008961/Sjc_0007462/Sjc_0009704
GO:0042273	ribosomal large subunit biogenesis	58	-0.429547	-1.44578	0.0194234	0.288461	0.268509	2020	tags=45%, list=23%, signal=35%	Sjc_0006947/Sjc_0000385/Sjc_0008746/Sjc_0002599/Sjc_0007007/Sjc_0001212/Sjc_0002913/Sjc_0002651/Sjc_0001577/Sjc_0000919/Sjc_0003536/Sjc_0009429/Sjc_0008927/Sjc_0000451/Sjc_0003771/Sjc_0006472/Sjc_0000247/Sjc_0001058/Sjc_0004562/Sjc_0007762/Sjc_0002648/Sjc_0008418/Sjc_0007923/Sjc_0003863/Sjc_0001066/Sjc_0002110
GO:2000379	positive regulation of reactive oxygen species metabolic process	34	-0.517021	-1.58336	0.0197919	0.288652	0.268688	1450	tags=41%, list=16%, signal=35%	Sjc_0005072/Sjc_0002388/Sjc_0008960/Sjc_0003306/Sjc_0002935/Sjc_0008962/Sjc_0008280/Sjc_0002015/Sjc_0002621/Sjc_0009705/Sjc_0008961/Sjc_0002622/Sjc_0009704/Sjc_0009349
GO:0045844	positive regulation of striated muscle tissue development	39	-0.486096	-1.52713	0.0200618	0.288976	0.268989	1569	tags=36%, list=18%, signal=30%	Sjc_0002069/Sjc_0002490/Sjc_0008960/Sjc_0000150/Sjc_0005286/Sjc_0003306/Sjc_0002174/Sjc_0002935/Sjc_0008962/Sjc_0002491/Sjc_0009705/Sjc_0008961/Sjc_0009704/Sjc_0004714
GO:0048636	positive regulation of muscle organ development	39	-0.486096	-1.52713	0.0200618	0.288976	0.268989	1569	tags=36%, list=18%, signal=30%	Sjc_0002069/Sjc_0002490/Sjc_0008960/Sjc_0000150/Sjc_0005286/Sjc_0003306/Sjc_0002174/Sjc_0002935/Sjc_0008962/Sjc_0002491/Sjc_0009705/Sjc_0008961/Sjc_0009704/Sjc_0004714
GO:1901863	positive regulation of muscle tissue development	39	-0.486096	-1.52713	0.0200618	0.288976	0.268989	1569	tags=36%, list=18%, signal=30%	Sjc_0002069/Sjc_0002490/Sjc_0008960/Sjc_0000150/Sjc_0005286/Sjc_0003306/Sjc_0002174/Sjc_0002935/Sjc_0008962/Sjc_0002491/Sjc_0009705/Sjc_0008961/Sjc_0009704/Sjc_0004714
GO:0043687	post-translational protein modification	117	-0.37459	-1.4405	0.0199364	0.288976	0.268989	2734	tags=45%, list=31%, signal=32%	Sjc_0003871/Sjc_0006566/Sjc_0000228/Sjc_0004727/Sjc_0008544/Sjc_0003502/Sjc_0001817/Sjc_0002879/Sjc_0008905/Sjc_0003895/Sjc_0004944/Sjc_0005251/Sjc_0003444/Sjc_0004697/Sjc_0006661/Sjc_0000082/Sjc_0005334/Sjc_0005848/Sjc_0001062/Sjc_0005254/Sjc_0005246/Sjc_0003644/Sjc_0000172/Sjc_0000227/Sjc_0008321/Sjc_0002578/Sjc_0008230/Sjc_0007592/Sjc_0009010/Sjc_0005082/Sjc_0006453/Sjc_0001045/Sjc_0000519/Sjc…
GO:0006942	regulation of striated muscle contraction	35	-0.509247	-1.57558	0.0201455	0.28929	0.269281	1740	tags=40%, list=20%, signal=32%	Sjc_0004743/Sjc_0001293/Sjc_0001555/Sjc_0005072/Sjc_0005456/Sjc_0005006/Sjc_0001396/Sjc_0005238/Sjc_0008280/Sjc_0001877/Sjc_0001878/Sjc_0008804/Sjc_0000190/Sjc_0000189
GO:0070873	regulation of glycogen metabolic process	12	-0.686691	-1.68078	0.0203364	0.289432	0.269414	989	tags=33%, list=11%, signal=30%	Sjc_0001934/Sjc_0003810/Sjc_0007073/Sjc_0008906
GO:0006024	glycosaminoglycan biosynthetic process	22	-0.596269	-1.65368	0.0205556	0.289432	0.269414	187	tags=14%, list=2%, signal=13%	Sjc_0006882/Sjc_0006881/Sjc_0003316
GO:0001731	formation of translation preinitiation complex	10	-0.707495	-1.64235	0.0205152	0.289432	0.269414	886	tags=70%, list=10%, signal=63%	Sjc_0006685/Sjc_0003171/Sjc_0003183/Sjc_0006770/Sjc_0001000/Sjc_0004023/Sjc_0005210
GO:0044849	estrous cycle	14	-0.641281	-1.59855	0.0205896	0.289432	0.269414	1161	tags=57%, list=13%, signal=50%	Sjc_0008261/Sjc_0008960/Sjc_0003306/Sjc_0002935/Sjc_0008962/Sjc_0009705/Sjc_0008961/Sjc_0009704
GO:0061136	regulation of proteasomal protein catabolic process	132	-0.367869	-1.43875	0.0203065	0.289432	0.269414	1641	tags=28%, list=19%, signal=23%	Sjc_0000227/Sjc_0005887/Sjc_0008263/Sjc_0005935/Sjc_0007687/Sjc_0003931/Sjc_0002835/Sjc_0007144/Sjc_0005677/Sjc_0009374/Sjc_0001372/Sjc_0006453/Sjc_0003038/Sjc_0001299/Sjc_0000150/Sjc_0007176/Sjc_0005286/Sjc_0003232/Sjc_0004294/Sjc_0007209/Sjc_0008172/Sjc_0000927/Sjc_0004419/Sjc_0005432/Sjc_0007728/Sjc_0008490/Sjc_0005239/Sjc_0008484/Sjc_0003515/Sjc_0003432/Sjc_0006212/Sjc_0007923/Sjc_0003431/Sjc…
GO:0031331	positive regulation of cellular catabolic process	209	-0.330749	-1.37616	0.0204707	0.289432	0.269414	2399	tags=34%, list=27%, signal=25%	Sjc_0003895/Sjc_0004944/Sjc_0005251/Sjc_0004202/Sjc_0008409/Sjc_0001350/Sjc_0009360/Sjc_0006661/Sjc_0006358/Sjc_0005919/Sjc_0004253/Sjc_0001008/Sjc_0006142/Sjc_0001009/Sjc_0006071/Sjc_0003426/Sjc_0003769/Sjc_0004735/Sjc_0004985/Sjc_0003744/Sjc_0006708/Sjc_0005254/Sjc_0000997/Sjc_0006101/Sjc_0002381/Sjc_0007778/Sjc_0000227/Sjc_0008263/Sjc_0002146/Sjc_0005935/Sjc_0003931/Sjc_0002835/Sjc_0007144/Sjc…
GO:0010243	response to organonitrogen compound	491	-0.270373	-1.24451	0.0204193	0.289432	0.269414	1701	tags=25%, list=19%, signal=21%	Sjc_0007774/Sjc_0001236/Sjc_0001293/Sjc_0006235/Sjc_0001280/Sjc_0005536/Sjc_0000227/Sjc_0002191/Sjc_0007942/Sjc_0006934/Sjc_0001555/Sjc_0005051/Sjc_0000042/Sjc_0008939/Sjc_0006949/Sjc_0008321/Sjc_0004117/Sjc_0007687/Sjc_0009409/Sjc_0005072/Sjc_0005465/Sjc_0007290/Sjc_0007144/Sjc_0000668/Sjc_0009374/Sjc_0008728/Sjc_0004620/Sjc_0009167/Sjc_0004514/Sjc_0007280/Sjc_0003916/Sjc_0002490/Sjc_0005456/Sjc…
GO:0001829	trophectodermal cell differentiation	23	0.732059	1.93003	0.0210156	0.294126	0.273783	570	tags=39%, list=6%, signal=37%	Sjc_0009528/Sjc_0002215/Sjc_0009527/Sjc_0009524/Sjc_0005604/Sjc_0009683/Sjc_0009515/Sjc_0005602/Sjc_0005857
GO:0016579	protein deubiquitination	123	-0.364871	-1.41055	0.0210495	0.294126	0.273783	1870	tags=45%, list=21%, signal=36%	Sjc_0006944/Sjc_0008544/Sjc_0003544/Sjc_0003502/Sjc_0000766/Sjc_0001817/Sjc_0002950/Sjc_0008905/Sjc_0002992/Sjc_0003895/Sjc_0003444/Sjc_0006002/Sjc_0003680/Sjc_0008409/Sjc_0003373/Sjc_0005848/Sjc_0005154/Sjc_0005254/Sjc_0005246/Sjc_0000172/Sjc_0001280/Sjc_0000785/Sjc_0000227/Sjc_0005887/Sjc_0006146/Sjc_0009452/Sjc_0007687/Sjc_0002578/Sjc_0009010/Sjc_0001372/Sjc_0006453/Sjc_0000969/Sjc_0007185/Sjc…
GO:0035821	modulation of process of another organism	40	-0.487535	-1.5481	0.0211302	0.294372	0.274012	1985	tags=42%, list=23%, signal=33%	Sjc_0008955/Sjc_0004924/Sjc_0004202/Sjc_0008920/Sjc_0001406/Sjc_0001293/Sjc_0003898/Sjc_0002661/Sjc_0007144/Sjc_0006453/Sjc_0005123/Sjc_0006710/Sjc_0001512/Sjc_0003767/Sjc_0009349/Sjc_0006712/Sjc_0008906
GO:0000380	alternative mRNA splicing, via spliceosome	79	-0.414181	-1.48478	0.0213486	0.296529	0.27602	1859	tags=37%, list=21%, signal=29%	Sjc_0000310/Sjc_0007645/Sjc_0002087/Sjc_0008986/Sjc_0008939/Sjc_0001592/Sjc_0001577/Sjc_0007144/Sjc_0007820/Sjc_0008814/Sjc_0001696/Sjc_0002421/Sjc_0007272/Sjc_0001828/Sjc_0007527/Sjc_0002428/Sjc_0007715/Sjc_0001720/Sjc_0003799/Sjc_0000825/Sjc_0003348/Sjc_0003223/Sjc_0001805/Sjc_0004509/Sjc_0003170/Sjc_0003356/Sjc_0001346/Sjc_0006712/Sjc_0005509
GO:0010676	positive regulation of cellular carbohydrate metabolic process	21	-0.589215	-1.61327	0.0214377	0.296883	0.27635	1335	tags=33%, list=15%, signal=28%	Sjc_0002490/Sjc_0009284/Sjc_0001934/Sjc_0003810/Sjc_0002491/Sjc_0007073/Sjc_0008906
GO:0045851	pH reduction	29	-0.530472	-1.5838	0.021646	0.29777	0.277175	2255	tags=52%, list=26%, signal=39%	Sjc_0009191/Sjc_0008111/Sjc_0006041/Sjc_0000816/Sjc_0004620/Sjc_0007335/Sjc_0000770/Sjc_0007951/Sjc_0005299/Sjc_0002485/Sjc_0002996/Sjc_0008547/Sjc_0005874/Sjc_0007207/Sjc_0000272
GO:0007458	progression of morphogenetic furrow involved in compound eye morphogenesis	15	-0.624938	-1.57057	0.0216931	0.29777	0.277175	1150	tags=53%, list=13%, signal=46%	Sjc_0008960/Sjc_0003306/Sjc_0002935/Sjc_0008962/Sjc_0009705/Sjc_0008961/Sjc_0009704/Sjc_0001069
GO:0007044	cell-substrate junction assembly	55	-0.445201	-1.4934	0.0216662	0.29777	0.277175	1670	tags=29%, list=19%, signal=24%	Sjc_0001280/Sjc_0005887/Sjc_0001318/Sjc_0000731/Sjc_0006095/Sjc_0002380/Sjc_0000868/Sjc_0002791/Sjc_0005111/Sjc_0000867/Sjc_0003767/Sjc_0002621/Sjc_0002622/Sjc_0006882/Sjc_0006881/Sjc_0006712
GO:0043162	ubiquitin-dependent protein catabolic process via the multivesicular body sorting pathway	18	-0.591498	-1.56274	0.0220708	0.302066	0.281174	2535	tags=56%, list=29%, signal=40%	Sjc_0001702/Sjc_0003677/Sjc_0005361/Sjc_0008774/Sjc_0003386/Sjc_0002803/Sjc_0003590/Sjc_0005773/Sjc_0001942/Sjc_0005357
GO:2001223	negative regulation of neuron migration	15	-0.622499	-1.56444	0.0222915	0.304195	0.283155	1150	tags=47%, list=13%, signal=41%	Sjc_0008960/Sjc_0003306/Sjc_0002935/Sjc_0008962/Sjc_0009705/Sjc_0008961/Sjc_0009704
GO:0046112	nucleobase biosynthetic process	12	-0.680314	-1.66517	0.0226118	0.304209	0.283169	549	tags=50%, list=6%, signal=47%	Sjc_0008797/Sjc_0007213/Sjc_0006944/Sjc_0001979/Sjc_0005120/Sjc_0007810
GO:0006379	mRNA cleavage	17	-0.624883	-1.63158	0.0226185	0.304209	0.283169	2275	tags=53%, list=26%, signal=39%	Sjc_0005993/Sjc_0000586/Sjc_0007547/Sjc_0009340/Sjc_0003898/Sjc_0005333/Sjc_0003467/Sjc_0008386/Sjc_0004895
GO:0070911	global genome nucleotide-excision repair	18	-0.589941	-1.55863	0.0223671	0.304209	0.283169	446	tags=17%, list=5%, signal=16%	Sjc_0005239/Sjc_0003432/Sjc_0003431
GO:2000060	positive regulation of ubiquitin-dependent protein catabolic process	62	-0.438103	-1.49306	0.0226038	0.304209	0.283169	2399	tags=44%, list=27%, signal=32%	Sjc_0003895/Sjc_0004944/Sjc_0005251/Sjc_0009360/Sjc_0006661/Sjc_0006358/Sjc_0001008/Sjc_0001009/Sjc_0005254/Sjc_0000997/Sjc_0008263/Sjc_0005935/Sjc_0003931/Sjc_0002835/Sjc_0005677/Sjc_0007176/Sjc_0003232/Sjc_0007728/Sjc_0008490/Sjc_0002621/Sjc_0005239/Sjc_0003515/Sjc_0003432/Sjc_0002622/Sjc_0003431/Sjc_0008906/Sjc_0005934
GO:0034767	positive regulation of ion transmembrane transport	52	-0.445117	-1.47463	0.02255	0.304209	0.283169	1612	tags=31%, list=18%, signal=25%	Sjc_0001555/Sjc_0006623/Sjc_0001169/Sjc_0005456/Sjc_0005006/Sjc_0000033/Sjc_0004471/Sjc_0001284/Sjc_0003767/Sjc_0006700/Sjc_0008280/Sjc_0001877/Sjc_0000272/Sjc_0001878/Sjc_0008804/Sjc_0000189
GO:0010038	response to metal ion	210	-0.330272	-1.37453	0.0228835	0.306889	0.285663	1468	tags=24%, list=17%, signal=21%	Sjc_0009409/Sjc_0005072/Sjc_0007260/Sjc_0007290/Sjc_0007144/Sjc_0002388/Sjc_0000668/Sjc_0009167/Sjc_0001169/Sjc_0002490/Sjc_0005082/Sjc_0009488/Sjc_0008261/Sjc_0008960/Sjc_0001047/Sjc_0007176/Sjc_0003836/Sjc_0003306/Sjc_0000303/Sjc_0005515/Sjc_0002935/Sjc_0000388/Sjc_0005424/Sjc_0005249/Sjc_0002845/Sjc_0008962/Sjc_0003296/Sjc_0002791/Sjc_0002491/Sjc_0001284/Sjc_0000647/Sjc_0007228/Sjc_0003767/Sjc…
GO:0045913	positive regulation of carbohydrate metabolic process	26	-0.558104	-1.6222	0.0230731	0.308544	0.287204	1335	tags=31%, list=15%, signal=26%	Sjc_0002490/Sjc_0009284/Sjc_0001934/Sjc_0003810/Sjc_0003673/Sjc_0002491/Sjc_0007073/Sjc_0008906
GO:0048865	stem cell fate commitment	30	-0.53102	-1.59324	0.0232356	0.309216	0.287829	1150	tags=37%, list=13%, signal=32%	Sjc_0008960/Sjc_0003306/Sjc_0005497/Sjc_0002935/Sjc_0008962/Sjc_0008782/Sjc_0009705/Sjc_0008961/Sjc_0003645/Sjc_0009704/Sjc_0003229
GO:0042407	cristae formation	16	-0.616244	-1.58259	0.0232558	0.309216	0.287829	2415	tags=62%, list=27%, signal=45%	Sjc_0004115/Sjc_0007060/Sjc_0001147/Sjc_0003147/Sjc_0007065/Sjc_0003096/Sjc_0007260/Sjc_0009260/Sjc_0006670/Sjc_0002845
GO:0044264	cellular polysaccharide metabolic process	48	-0.465247	-1.50948	0.023446	0.310859	0.289359	2315	tags=35%, list=26%, signal=26%	Sjc_0005965/Sjc_0004271/Sjc_0002746/Sjc_0001605/Sjc_0004692/Sjc_0001680/Sjc_0004729/Sjc_0002662/Sjc_0001642/Sjc_0000589/Sjc_0001934/Sjc_0003810/Sjc_0008801/Sjc_0008812/Sjc_0000590/Sjc_0007073/Sjc_0008906
GO:0016049	cell growth	315	-0.289075	-1.28431	0.0235163	0.310909	0.289405	1715	tags=21%, list=19%, signal=17%	Sjc_0006101/Sjc_0001554/Sjc_0001280/Sjc_0003996/Sjc_0006934/Sjc_0005051/Sjc_0006623/Sjc_0000369/Sjc_0001592/Sjc_0003386/Sjc_0000456/Sjc_0007803/Sjc_0007799/Sjc_0001169/Sjc_0002490/Sjc_0001696/Sjc_0006924/Sjc_0005568/Sjc_0007896/Sjc_0001890/Sjc_0004012/Sjc_0008960/Sjc_0001274/Sjc_0004471/Sjc_0004929/Sjc_0003371/Sjc_0005790/Sjc_0002485/Sjc_0006099/Sjc_0003306/Sjc_0005497/Sjc_0000914/Sjc_0002935/Sjc…
GO:0016556	mRNA modification	40	0.600472	1.73585	0.0241629	0.311117	0.289599	1537	tags=40%, list=17%, signal=33%	Sjc_0009528/Sjc_0002215/Sjc_0009527/Sjc_0009524/Sjc_0005604/Sjc_0006246/Sjc_0009683/Sjc_0009515/Sjc_0005602/Sjc_0005857/Sjc_0001587/Sjc_0005603/Sjc_0005505/Sjc_0003541/Sjc_0000657/Sjc_0008267
GO:0061723	glycophagy	12	-0.678905	-1.66172	0.0237495	0.311117	0.289599	1122	tags=50%, list=13%, signal=44%	Sjc_0005965/Sjc_0004271/Sjc_0000589/Sjc_0008812/Sjc_0000590/Sjc_0007073
GO:0019076	viral release from host cell	11	-0.677825	-1.62565	0.024332	0.311117	0.289599	1985	tags=55%, list=23%, signal=42%	Sjc_0006566/Sjc_0008920/Sjc_0000816/Sjc_0008774/Sjc_0002538/Sjc_0006112
GO:0035890	exit from host	11	-0.677825	-1.62565	0.024332	0.311117	0.289599	1985	tags=55%, list=23%, signal=42%	Sjc_0006566/Sjc_0008920/Sjc_0000816/Sjc_0008774/Sjc_0002538/Sjc_0006112
GO:0035891	exit from host cell	11	-0.677825	-1.62565	0.024332	0.311117	0.289599	1985	tags=55%, list=23%, signal=42%	Sjc_0006566/Sjc_0008920/Sjc_0000816/Sjc_0008774/Sjc_0002538/Sjc_0006112
GO:0052126	movement in host environment	11	-0.677825	-1.62565	0.024332	0.311117	0.289599	1985	tags=55%, list=23%, signal=42%	Sjc_0006566/Sjc_0008920/Sjc_0000816/Sjc_0008774/Sjc_0002538/Sjc_0006112
GO:0051452	intracellular pH reduction	28	-0.54264	-1.61089	0.0243039	0.311117	0.289599	2255	tags=54%, list=26%, signal=40%	Sjc_0009191/Sjc_0008111/Sjc_0006041/Sjc_0000816/Sjc_0004620/Sjc_0007335/Sjc_0000770/Sjc_0007951/Sjc_0005299/Sjc_0002485/Sjc_0002996/Sjc_0008547/Sjc_0005874/Sjc_0007207/Sjc_0000272
GO:0035116	embryonic hindlimb morphogenesis	10	-0.691844	-1.60602	0.0241437	0.311117	0.289599	922	tags=20%, list=10%, signal=18%	Sjc_0005497/Sjc_0007419
GO:0010749	regulation of nitric oxide mediated signal transduction	15	-0.620199	-1.55866	0.0240868	0.311117	0.289599	1150	tags=60%, list=13%, signal=52%	Sjc_0006235/Sjc_0008960/Sjc_0003306/Sjc_0002935/Sjc_0008962/Sjc_0009705/Sjc_0008961/Sjc_0006237/Sjc_0009704
GO:0008652	cellular amino acid biosynthetic process	33	-0.507962	-1.55581	0.0242058	0.311117	0.289599	2049	tags=48%, list=23%, signal=37%	Sjc_0004909/Sjc_0008550/Sjc_0002609/Sjc_0006235/Sjc_0000785/Sjc_0003061/Sjc_0002856/Sjc_0007290/Sjc_0004916/Sjc_0007821/Sjc_0000388/Sjc_0002589/Sjc_0006237/Sjc_0005053/Sjc_0002674/Sjc_0006467
GO:0005976	polysaccharide metabolic process	49	-0.464987	-1.51728	0.0239309	0.311117	0.289599	2315	tags=35%, list=26%, signal=26%	Sjc_0005965/Sjc_0004271/Sjc_0002746/Sjc_0001605/Sjc_0004692/Sjc_0001680/Sjc_0004729/Sjc_0002662/Sjc_0001642/Sjc_0000589/Sjc_0001934/Sjc_0003810/Sjc_0008801/Sjc_0008812/Sjc_0000590/Sjc_0007073/Sjc_0008906
GO:0034248	regulation of cellular amide metabolic process	248	-0.310601	-1.33312	0.0239128	0.311117	0.289599	1951	tags=32%, list=22%, signal=26%	Sjc_0003769/Sjc_0000546/Sjc_0003122/Sjc_0007547/Sjc_0001329/Sjc_0007645/Sjc_0001902/Sjc_0007161/Sjc_0002725/Sjc_0009217/Sjc_0001236/Sjc_0001280/Sjc_0007778/Sjc_0003009/Sjc_0000785/Sjc_0005339/Sjc_0008939/Sjc_0003712/Sjc_0006146/Sjc_0001577/Sjc_0005305/Sjc_0007144/Sjc_0001841/Sjc_0000271/Sjc_0000811/Sjc_0002490/Sjc_0001696/Sjc_0004527/Sjc_0000168/Sjc_0000607/Sjc_0006699/Sjc_0002421/Sjc_0008084/Sjc…
GO:0030970	retrograde protein transport, ER to cytosol	25	-0.554408	-1.5829	0.0245332	0.311132	0.289613	1411	tags=36%, list=16%, signal=30%	Sjc_0009374/Sjc_0008728/Sjc_0005082/Sjc_0001672/Sjc_0003232/Sjc_0005432/Sjc_0004983/Sjc_0008484/Sjc_0003515
GO:1903513	endoplasmic reticulum to cytosol transport	25	-0.554408	-1.5829	0.0245332	0.311132	0.289613	1411	tags=36%, list=16%, signal=30%	Sjc_0009374/Sjc_0008728/Sjc_0005082/Sjc_0001672/Sjc_0003232/Sjc_0005432/Sjc_0004983/Sjc_0008484/Sjc_0003515
GO:1903522	regulation of blood circulation	103	-0.38667	-1.4479	0.0244718	0.311132	0.289613	1731	tags=32%, list=20%, signal=26%	Sjc_0001680/Sjc_0006235/Sjc_0001280/Sjc_0001555/Sjc_0006623/Sjc_0005072/Sjc_0005456/Sjc_0005006/Sjc_0008960/Sjc_0003038/Sjc_0000749/Sjc_0003306/Sjc_0001396/Sjc_0000748/Sjc_0002935/Sjc_0004195/Sjc_0003673/Sjc_0005238/Sjc_0008962/Sjc_0005810/Sjc_0001979/Sjc_0008280/Sjc_0000256/Sjc_0009705/Sjc_0001877/Sjc_0008961/Sjc_0006237/Sjc_0009704/Sjc_0009386/Sjc_0001878/Sjc_0008804/Sjc_0000190/Sjc_0000189
GO:0055117	regulation of cardiac muscle contraction	30	-0.527822	-1.58365	0.0247347	0.311991	0.290413	1612	tags=40%, list=18%, signal=33%	Sjc_0001555/Sjc_0005072/Sjc_0005456/Sjc_0005006/Sjc_0001396/Sjc_0005238/Sjc_0008280/Sjc_0001877/Sjc_0001878/Sjc_0008804/Sjc_0000190/Sjc_0000189
GO:0043069	negative regulation of programmed cell death	360	-0.290522	-1.30984	0.0247039	0.311991	0.290413	1768	tags=26%, list=20%, signal=21%	Sjc_0002583/Sjc_0003644/Sjc_0005242/Sjc_0006613/Sjc_0001236/Sjc_0001293/Sjc_0003148/Sjc_0003938/Sjc_0001280/Sjc_0008387/Sjc_0003523/Sjc_0003996/Sjc_0000042/Sjc_0001318/Sjc_0008263/Sjc_0002661/Sjc_0000369/Sjc_0001254/Sjc_0000643/Sjc_0000731/Sjc_0002835/Sjc_0007144/Sjc_0002388/Sjc_0005677/Sjc_0007340/Sjc_0003914/Sjc_0005342/Sjc_0003454/Sjc_0002490/Sjc_0009249/Sjc_0005082/Sjc_0005006/Sjc_0003647/Sjc…
GO:0022408	negative regulation of cell-cell adhesion	50	-0.455674	-1.49794	0.0250382	0.31328	0.291612	1150	tags=26%, list=13%, signal=23%	Sjc_0008960/Sjc_0003306/Sjc_0002794/Sjc_0002935/Sjc_0008962/Sjc_0002015/Sjc_0002621/Sjc_0009705/Sjc_0008961/Sjc_0002622/Sjc_0009704/Sjc_0009316/Sjc_0006170
GO:0007040	lysosome organization	39	-0.474661	-1.4912	0.0250382	0.31328	0.291612	1908	tags=36%, list=22%, signal=28%	Sjc_0005464/Sjc_0006033/Sjc_0005113/Sjc_0000816/Sjc_0001680/Sjc_0006116/Sjc_0001318/Sjc_0003121/Sjc_0005687/Sjc_0005299/Sjc_0002485/Sjc_0005874/Sjc_0003515/Sjc_0005688
GO:0080171	lytic vacuole organization	39	-0.474661	-1.4912	0.0250382	0.31328	0.291612	1908	tags=36%, list=22%, signal=28%	Sjc_0005464/Sjc_0006033/Sjc_0005113/Sjc_0000816/Sjc_0001680/Sjc_0006116/Sjc_0001318/Sjc_0003121/Sjc_0005687/Sjc_0005299/Sjc_0002485/Sjc_0005874/Sjc_0003515/Sjc_0005688
GO:0090129	positive regulation of synapse maturation	10	-0.687831	-1.5967	0.0258184	0.320035	0.2979	765	tags=40%, list=9%, signal=37%	Sjc_0001688/Sjc_0004419/Sjc_0009285/Sjc_0000306
GO:0003254	regulation of membrane depolarization	19	-0.573569	-1.54684	0.025769	0.320035	0.2979	1081	tags=42%, list=12%, signal=37%	Sjc_0006878/Sjc_0007290/Sjc_0007176/Sjc_0003673/Sjc_0005238/Sjc_0008906/Sjc_0000190/Sjc_0000189
GO:0045176	apical protein localization	24	-0.530959	-1.50026	0.0258524	0.320035	0.2979	3266	tags=67%, list=37%, signal=42%	Sjc_0000956/Sjc_0007213/Sjc_0003643/Sjc_0003603/Sjc_0007894/Sjc_0005216/Sjc_0008847/Sjc_0006858/Sjc_0004680/Sjc_0003426/Sjc_0007416/Sjc_0007723/Sjc_0003651/Sjc_0001288/Sjc_0002997/Sjc_0000189
GO:0051592	response to calcium ion	70	-0.427411	-1.49784	0.0257657	0.320035	0.2979	945	tags=30%, list=11%, signal=27%	Sjc_0006623/Sjc_0005149/Sjc_0009409/Sjc_0002490/Sjc_0008960/Sjc_0003306/Sjc_0002935/Sjc_0008962/Sjc_0002491/Sjc_0001284/Sjc_0008280/Sjc_0002621/Sjc_0009705/Sjc_0001877/Sjc_0008961/Sjc_0002622/Sjc_0009704/Sjc_0001878/Sjc_0009411/Sjc_0000189/Sjc_0007295
GO:0031111	negative regulation of microtubule polymerization or depolymerization	25	-0.549803	-1.56976	0.0263393	0.320623	0.298448	1203	tags=28%, list=14%, signal=24%	Sjc_0002583/Sjc_0004056/Sjc_0006931/Sjc_0001933/Sjc_0000688/Sjc_0008682/Sjc_0008683
GO:0010257	NADH dehydrogenase complex assembly	31	-0.521974	-1.56586	0.0262824	0.320623	0.298448	2962	tags=84%, list=34%, signal=56%	Sjc_0003177/Sjc_0006252/Sjc_0002397/Sjc_0007105/Sjc_0000209/Sjc_0008824/Sjc_0002607/Sjc_0007699/Sjc_0006717/Sjc_0000941/Sjc_0007211/Sjc_0004754/Sjc_0001716/Sjc_0003765/Sjc_0007065/Sjc_0005540/Sjc_0005151/Sjc_0009445/Sjc_0003094/Sjc_0003508/Sjc_0007263/Sjc_0009105/Sjc_0006031/Sjc_0008703/Sjc_0006635/Sjc_0001151
GO:0032981	mitochondrial respiratory chain complex I assembly	31	-0.521974	-1.56586	0.0262824	0.320623	0.298448	2962	tags=84%, list=34%, signal=56%	Sjc_0003177/Sjc_0006252/Sjc_0002397/Sjc_0007105/Sjc_0000209/Sjc_0008824/Sjc_0002607/Sjc_0007699/Sjc_0006717/Sjc_0000941/Sjc_0007211/Sjc_0004754/Sjc_0001716/Sjc_0003765/Sjc_0007065/Sjc_0005540/Sjc_0005151/Sjc_0009445/Sjc_0003094/Sjc_0003508/Sjc_0007263/Sjc_0009105/Sjc_0006031/Sjc_0008703/Sjc_0006635/Sjc_0001151
GO:0016330	second mitotic wave involved in compound eye morphogenesis	15	-0.614078	-1.54328	0.0264805	0.320623	0.298448	1150	tags=47%, list=13%, signal=41%	Sjc_0008960/Sjc_0003306/Sjc_0002935/Sjc_0008962/Sjc_0009705/Sjc_0008961/Sjc_0009704
GO:0042675	compound eye cone cell differentiation	19	-0.571313	-1.54075	0.0266525	0.320623	0.298448	1150	tags=47%, list=13%, signal=41%	Sjc_0008960/Sjc_0003371/Sjc_0003306/Sjc_0002935/Sjc_0008962/Sjc_0009705/Sjc_0008961/Sjc_0003645/Sjc_0009704
GO:0016203	muscle attachment	33	-0.502742	-1.53982	0.0263921	0.320623	0.298448	1150	tags=27%, list=13%, signal=24%	Sjc_0008960/Sjc_0003306/Sjc_0002935/Sjc_0008962/Sjc_0009705/Sjc_0008961/Sjc_0009704/Sjc_0008682/Sjc_0008683
GO:0050829	defense response to Gram-negative bacterium	46	-0.471214	-1.52689	0.026793	0.320623	0.298448	2125	tags=48%, list=24%, signal=36%	Sjc_0005914/Sjc_0009040/Sjc_0005455/Sjc_0008920/Sjc_0003654/Sjc_0003783/Sjc_0003147/Sjc_0003744/Sjc_0008449/Sjc_0001555/Sjc_0006182/Sjc_0009409/Sjc_0005456/Sjc_0006710/Sjc_0006670/Sjc_0002015/Sjc_0000272/Sjc_0001781/Sjc_0009349/Sjc_0008682/Sjc_0008683/Sjc_0009411
GO:0051897	positive regulation of protein kinase B signaling	38	-0.479338	-1.49737	0.0261343	0.320623	0.298448	1150	tags=32%, list=13%, signal=28%	Sjc_0005072/Sjc_0008960/Sjc_0003306/Sjc_0000028/Sjc_0002935/Sjc_0008962/Sjc_0007728/Sjc_0002621/Sjc_0009705/Sjc_0008961/Sjc_0002622/Sjc_0009704
GO:0003197	endocardial cushion development	24	-0.528725	-1.49395	0.0267702	0.320623	0.298448	1150	tags=42%, list=13%, signal=36%	Sjc_0002069/Sjc_0008960/Sjc_0003306/Sjc_0005497/Sjc_0002935/Sjc_0008962/Sjc_0006627/Sjc_0009705/Sjc_0008961/Sjc_0009704
GO:1902904	negative regulation of supramolecular fiber organization	70	-0.42463	-1.4881	0.0267631	0.320623	0.298448	2691	tags=41%, list=31%, signal=29%	Sjc_0005169/Sjc_0004529/Sjc_0002553/Sjc_0006350/Sjc_0005480/Sjc_0000829/Sjc_0000110/Sjc_0003095/Sjc_0005479/Sjc_0003426/Sjc_0007453/Sjc_0008898/Sjc_0005005/Sjc_0006349/Sjc_0002583/Sjc_0001318/Sjc_0004657/Sjc_0004056/Sjc_0006375/Sjc_0000752/Sjc_0006931/Sjc_0001933/Sjc_0000688/Sjc_0004631/Sjc_0003767/Sjc_0006882/Sjc_0008682/Sjc_0006881/Sjc_0008683
GO:1903078	positive regulation of protein localization to plasma membrane	38	-0.474095	-1.48099	0.0267603	0.320623	0.298448	1555	tags=32%, list=18%, signal=26%	Sjc_0005935/Sjc_0006597/Sjc_0008960/Sjc_0003306/Sjc_0002935/Sjc_0008962/Sjc_0001284/Sjc_0009705/Sjc_0008961/Sjc_0009704/Sjc_0008906/Sjc_0005934
GO:0042059	negative regulation of epidermal growth factor receptor signaling pathway	60	-0.433675	-1.47564	0.0266928	0.320623	0.298448	1738	tags=33%, list=20%, signal=27%	Sjc_0000816/Sjc_0008774/Sjc_0009452/Sjc_0002978/Sjc_0002803/Sjc_0008960/Sjc_0003306/Sjc_0005773/Sjc_0002935/Sjc_0004419/Sjc_0000868/Sjc_0008962/Sjc_0000867/Sjc_0001942/Sjc_0002621/Sjc_0009705/Sjc_0008961/Sjc_0002622/Sjc_0005748/Sjc_0009704
GO:0060047	heart contraction	99	-0.38088	-1.42529	0.0263137	0.320623	0.298448	1743	tags=29%, list=20%, signal=24%	Sjc_0007065/Sjc_0001680/Sjc_0007586/Sjc_0006235/Sjc_0001555/Sjc_0006623/Sjc_0005072/Sjc_0005456/Sjc_0005006/Sjc_0003038/Sjc_0000749/Sjc_0003371/Sjc_0001396/Sjc_0000748/Sjc_0004195/Sjc_0003673/Sjc_0005238/Sjc_0005810/Sjc_0001979/Sjc_0008280/Sjc_0000256/Sjc_0001877/Sjc_0006237/Sjc_0009386/Sjc_0001878/Sjc_0001346/Sjc_0008804/Sjc_0000190/Sjc_0000189
GO:0016254	preassembly of GPI anchor in ER membrane	11	0.742735	1.6902	0.0275677	0.32099	0.298789	553	tags=36%, list=6%, signal=34%	Sjc_0002026/Sjc_0002027/Sjc_0003272/Sjc_0008989
GO:0007615	anesthesia-resistant memory	18	0.657193	1.66738	0.0275434	0.32099	0.298789	211	tags=22%, list=2%, signal=22%	Sjc_0006810/Sjc_0006900/Sjc_0004493/Sjc_0006814
GO:1903727	positive regulation of phospholipid metabolic process	28	-0.536574	-1.59289	0.0275056	0.32099	0.298789	1150	tags=39%, list=13%, signal=34%	Sjc_0008960/Sjc_0003306/Sjc_0000468/Sjc_0002935/Sjc_0008962/Sjc_0007728/Sjc_0002621/Sjc_0009705/Sjc_0008961/Sjc_0002622/Sjc_0009704
GO:1903541	regulation of exosomal secretion	10	-0.680939	-1.5807	0.0274931	0.32099	0.298789	2525	tags=70%, list=29%, signal=50%	Sjc_0003677/Sjc_0005361/Sjc_0000816/Sjc_0009452/Sjc_0002978/Sjc_0008172/Sjc_0005357
GO:1903543	positive regulation of exosomal secretion	10	-0.680939	-1.5807	0.0274931	0.32099	0.298789	2525	tags=70%, list=29%, signal=50%	Sjc_0003677/Sjc_0005361/Sjc_0000816/Sjc_0009452/Sjc_0002978/Sjc_0008172/Sjc_0005357
GO:0010656	negative regulation of muscle cell apoptotic process	30	-0.519973	-1.5601	0.027433	0.32099	0.298789	1150	tags=33%, list=13%, signal=29%	Sjc_0008960/Sjc_0003306/Sjc_0002935/Sjc_0008962/Sjc_0002621/Sjc_0009705/Sjc_0008961/Sjc_0002622/Sjc_0009704/Sjc_0004714
GO:0031638	zymogen activation	18	-0.574675	-1.51829	0.0274033	0.32099	0.298789	1881	tags=50%, list=21%, signal=39%	Sjc_0004985/Sjc_0006101/Sjc_0006146/Sjc_0006099/Sjc_0004987/Sjc_0006710/Sjc_0005478/Sjc_0006100/Sjc_0006170
GO:0050848	regulation of calcium-mediated signaling	48	-0.454778	-1.47551	0.0272738	0.32099	0.298789	1700	tags=38%, list=19%, signal=30%	Sjc_0001236/Sjc_0006235/Sjc_0007942/Sjc_0001548/Sjc_0005072/Sjc_0001976/Sjc_0008960/Sjc_0003306/Sjc_0002935/Sjc_0008962/Sjc_0001979/Sjc_0008280/Sjc_0002621/Sjc_0009705/Sjc_0008961/Sjc_0002622/Sjc_0006237/Sjc_0009704
GO:0003013	circulatory system process	176	-0.340414	-1.39095	0.0274159	0.32099	0.298789	1768	tags=29%, list=20%, signal=24%	Sjc_0002583/Sjc_0007937/Sjc_0007065/Sjc_0001680/Sjc_0007586/Sjc_0006235/Sjc_0001280/Sjc_0001555/Sjc_0006623/Sjc_0002069/Sjc_0007029/Sjc_0005072/Sjc_0002388/Sjc_0007314/Sjc_0001169/Sjc_0005456/Sjc_0005006/Sjc_0006147/Sjc_0008960/Sjc_0003038/Sjc_0000749/Sjc_0007176/Sjc_0003371/Sjc_0003306/Sjc_0001396/Sjc_0000748/Sjc_0002935/Sjc_0004195/Sjc_0003673/Sjc_0005238/Sjc_0008962/Sjc_0001284/Sjc_0004631/Sjc…
GO:0006417	regulation of translation	226	-0.322382	-1.36039	0.0275802	0.32099	0.298789	1670	tags=30%, list=19%, signal=25%	Sjc_0001280/Sjc_0007778/Sjc_0003009/Sjc_0000785/Sjc_0005339/Sjc_0008939/Sjc_0003712/Sjc_0006146/Sjc_0001577/Sjc_0005305/Sjc_0007144/Sjc_0001841/Sjc_0000811/Sjc_0002490/Sjc_0001696/Sjc_0004527/Sjc_0000168/Sjc_0000607/Sjc_0006699/Sjc_0002421/Sjc_0008084/Sjc_0001890/Sjc_0005428/Sjc_0008960/Sjc_0003038/Sjc_0001866/Sjc_0000451/Sjc_0000575/Sjc_0006450/Sjc_0003371/Sjc_0004105/Sjc_0006480/Sjc_0003306/Sjc…
GO:0006873	cellular ion homeostasis	221	-0.319945	-1.34413	0.027467	0.32099	0.298789	2138	tags=32%, list=24%, signal=25%	Sjc_0005261/Sjc_0003967/Sjc_0007543/Sjc_0008111/Sjc_0006041/Sjc_0005455/Sjc_0008920/Sjc_0003783/Sjc_0007424/Sjc_0003147/Sjc_0003744/Sjc_0007013/Sjc_0002583/Sjc_0000816/Sjc_0008787/Sjc_0006235/Sjc_0003938/Sjc_0006116/Sjc_0001555/Sjc_0001548/Sjc_0001318/Sjc_0006623/Sjc_0005149/Sjc_0002468/Sjc_0005072/Sjc_0007290/Sjc_0004620/Sjc_0001841/Sjc_0005456/Sjc_0003801/Sjc_0005082/Sjc_0001824/Sjc_0007335/Sjc…
GO:0006826	iron ion transport	25	-0.547155	-1.5622	0.0281454	0.326753	0.304153	1377	tags=64%, list=16%, signal=54%	Sjc_0002553/Sjc_0000273/Sjc_0009191/Sjc_0005261/Sjc_0008111/Sjc_0004620/Sjc_0008820/Sjc_0007951/Sjc_0006582/Sjc_0004664/Sjc_0006710/Sjc_0006581/Sjc_0005249/Sjc_0006700/Sjc_0007207/Sjc_0000272
GO:0070849	response to epidermal growth factor	36	-0.516139	-1.60292	0.0285189	0.326849	0.304243	1345	tags=33%, list=15%, signal=28%	Sjc_0000271/Sjc_0008960/Sjc_0003306/Sjc_0002935/Sjc_0004419/Sjc_0008962/Sjc_0003767/Sjc_0002015/Sjc_0009705/Sjc_0008961/Sjc_0009704/Sjc_0006712
GO:0071364	cellular response to epidermal growth factor stimulus	36	-0.516139	-1.60292	0.0285189	0.326849	0.304243	1345	tags=33%, list=15%, signal=28%	Sjc_0000271/Sjc_0008960/Sjc_0003306/Sjc_0002935/Sjc_0004419/Sjc_0008962/Sjc_0003767/Sjc_0002015/Sjc_0009705/Sjc_0008961/Sjc_0009704/Sjc_0006712
GO:0060260	regulation of transcription initiation from RNA polymerase II promoter	26	-0.544479	-1.5826	0.0286576	0.326849	0.304243	1886	tags=58%, list=21%, signal=45%	Sjc_0009584/Sjc_0004561/Sjc_0000227/Sjc_0000876/Sjc_0006453/Sjc_0001828/Sjc_0001299/Sjc_0004294/Sjc_0003971/Sjc_0005559/Sjc_0007715/Sjc_0000927/Sjc_0001720/Sjc_0006212/Sjc_0001346
GO:0010862	positive regulation of pathway-restricted SMAD protein phosphorylation	11	-0.657105	-1.57595	0.028784	0.326849	0.304243	1772	tags=45%, list=20%, signal=36%	Sjc_0008077/Sjc_0007885/Sjc_0008074/Sjc_0007991/Sjc_0008172
GO:0035215	genital disc development	31	-0.514296	-1.54282	0.0284596	0.326849	0.304243	1150	tags=39%, list=13%, signal=34%	Sjc_0008878/Sjc_0008960/Sjc_0003306/Sjc_0005497/Sjc_0002935/Sjc_0008962/Sjc_0008877/Sjc_0001942/Sjc_0009705/Sjc_0008961/Sjc_0009704/Sjc_0009316
GO:0099622	cardiac muscle cell membrane repolarization	18	-0.572083	-1.51145	0.0285883	0.326849	0.304243	1471	tags=39%, list=17%, signal=32%	Sjc_0004657/Sjc_0005006/Sjc_0000749/Sjc_0000748/Sjc_0005810/Sjc_0000256/Sjc_0008804
GO:1904064	positive regulation of cation transmembrane transport	49	-0.455218	-1.4854	0.0286853	0.326849	0.304243	1612	tags=33%, list=18%, signal=27%	Sjc_0001555/Sjc_0006623/Sjc_0001169/Sjc_0005456/Sjc_0005006/Sjc_0000033/Sjc_0004471/Sjc_0001284/Sjc_0003767/Sjc_0006700/Sjc_0008280/Sjc_0001877/Sjc_0000272/Sjc_0001878/Sjc_0008804/Sjc_0000189
GO:0001775	cell activation	405	-0.28867	-1.312	0.0283113	0.326849	0.304243	2092	tags=30%, list=24%, signal=24%	Sjc_0001605/Sjc_0003426/Sjc_0006541/Sjc_0007087/Sjc_0007454/Sjc_0009415/Sjc_0008920/Sjc_0007299/Sjc_0004740/Sjc_0003769/Sjc_0004534/Sjc_0003286/Sjc_0007094/Sjc_0004651/Sjc_0004985/Sjc_0001325/Sjc_0004568/Sjc_0003159/Sjc_0008832/Sjc_0003001/Sjc_0007972/Sjc_0009112/Sjc_0008077/Sjc_0005246/Sjc_0000172/Sjc_0005242/Sjc_0000816/Sjc_0001680/Sjc_0001293/Sjc_0001280/Sjc_0003727/Sjc_0009178/Sjc_0007942/Sjc…
GO:0010035	response to inorganic substance	302	-0.287347	-1.27108	0.028737	0.326849	0.304243	1468	tags=24%, list=17%, signal=20%	Sjc_0007942/Sjc_0005051/Sjc_0000042/Sjc_0006623/Sjc_0005149/Sjc_0009409/Sjc_0005072/Sjc_0007260/Sjc_0007290/Sjc_0007144/Sjc_0002388/Sjc_0000668/Sjc_0009167/Sjc_0000271/Sjc_0001169/Sjc_0002490/Sjc_0001590/Sjc_0005082/Sjc_0009488/Sjc_0000225/Sjc_0001890/Sjc_0008261/Sjc_0008960/Sjc_0001219/Sjc_0001047/Sjc_0007176/Sjc_0005700/Sjc_0003836/Sjc_0003306/Sjc_0001396/Sjc_0000303/Sjc_0005515/Sjc_0002935/Sjc…
GO:1990542	mitochondrial transmembrane transport	53	-0.433223	-1.44068	0.0288799	0.327142	0.304515	2415	tags=45%, list=27%, signal=33%	Sjc_0004115/Sjc_0007060/Sjc_0000554/Sjc_0005056/Sjc_0001147/Sjc_0008039/Sjc_0003147/Sjc_0005348/Sjc_0007013/Sjc_0005149/Sjc_0008826/Sjc_0003314/Sjc_0003096/Sjc_0003508/Sjc_0008250/Sjc_0005700/Sjc_0003792/Sjc_0000468/Sjc_0006670/Sjc_0002005/Sjc_0002845/Sjc_0003185/Sjc_0005961/Sjc_0002062
GO:0062013	positive regulation of small molecule metabolic process	45	-0.468429	-1.51319	0.0292031	0.330002	0.307177	1335	tags=22%, list=15%, signal=19%	Sjc_0002490/Sjc_0009284/Sjc_0004929/Sjc_0001934/Sjc_0003810/Sjc_0003673/Sjc_0002491/Sjc_0003515/Sjc_0007073/Sjc_0008906
GO:0007026	negative regulation of microtubule depolymerization	12	-0.6638	-1.62475	0.0294407	0.330696	0.307823	807	tags=58%, list=9%, signal=53%	Sjc_0008681/Sjc_0007351/Sjc_0004529/Sjc_0000829/Sjc_0000688/Sjc_0008682/Sjc_0008683
GO:0070920	regulation of production of small RNA involved in gene silencing by RNA	18	-0.56851	-1.50201	0.029477	0.330696	0.307823	1158	tags=44%, list=13%, signal=39%	Sjc_0005428/Sjc_0008960/Sjc_0003306/Sjc_0002935/Sjc_0008962/Sjc_0009705/Sjc_0008961/Sjc_0009704
GO:1903798	regulation of production of miRNAs involved in gene silencing by miRNA	18	-0.56851	-1.50201	0.029477	0.330696	0.307823	1158	tags=44%, list=13%, signal=39%	Sjc_0005428/Sjc_0008960/Sjc_0003306/Sjc_0002935/Sjc_0008962/Sjc_0009705/Sjc_0008961/Sjc_0009704
GO:0090128	regulation of synapse maturation	13	-0.643206	-1.60481	0.0297804	0.330973	0.308082	765	tags=31%, list=9%, signal=28%	Sjc_0001688/Sjc_0004419/Sjc_0009285/Sjc_0000306
GO:0042676	compound eye cone cell fate commitment	17	-0.602611	-1.57343	0.0297144	0.330973	0.308082	1150	tags=53%, list=13%, signal=46%	Sjc_0008960/Sjc_0003371/Sjc_0003306/Sjc_0002935/Sjc_0008962/Sjc_0009705/Sjc_0008961/Sjc_0003645/Sjc_0009704
GO:0033079	immature T cell proliferation	14	-0.614188	-1.53101	0.0300695	0.330973	0.308082	1150	tags=50%, list=13%, signal=44%	Sjc_0008960/Sjc_0003306/Sjc_0002935/Sjc_0008962/Sjc_0009705/Sjc_0008961/Sjc_0009704
GO:0033080	immature T cell proliferation in thymus	14	-0.614188	-1.53101	0.0300695	0.330973	0.308082	1150	tags=50%, list=13%, signal=44%	Sjc_0008960/Sjc_0003306/Sjc_0002935/Sjc_0008962/Sjc_0009705/Sjc_0008961/Sjc_0009704
GO:0045454	cell redox homeostasis	34	-0.497806	-1.52452	0.0297656	0.330973	0.308082	2512	tags=59%, list=29%, signal=42%	Sjc_0000273/Sjc_0009207/Sjc_0004658/Sjc_0005336/Sjc_0000533/Sjc_0009475/Sjc_0003570/Sjc_0001841/Sjc_0000519/Sjc_0007176/Sjc_0007032/Sjc_0008539/Sjc_0008973/Sjc_0001904/Sjc_0000647/Sjc_0005875/Sjc_0004064/Sjc_0005754/Sjc_0000272/Sjc_0008538
GO:0032414	positive regulation of ion transmembrane transporter activity	35	-0.485607	-1.50244	0.0301401	0.330973	0.308082	1330	tags=29%, list=15%, signal=24%	Sjc_0005456/Sjc_0000033/Sjc_0004471/Sjc_0001284/Sjc_0003767/Sjc_0008280/Sjc_0001877/Sjc_0001878/Sjc_0008804/Sjc_0000189
GO:0008016	regulation of heart contraction	81	-0.391205	-1.40546	0.0299553	0.330973	0.308082	1731	tags=31%, list=20%, signal=25%	Sjc_0001680/Sjc_0006235/Sjc_0001555/Sjc_0006623/Sjc_0005072/Sjc_0005456/Sjc_0005006/Sjc_0003038/Sjc_0000749/Sjc_0001396/Sjc_0000748/Sjc_0004195/Sjc_0003673/Sjc_0005238/Sjc_0005810/Sjc_0001979/Sjc_0008280/Sjc_0000256/Sjc_0001877/Sjc_0006237/Sjc_0009386/Sjc_0001878/Sjc_0008804/Sjc_0000190/Sjc_0000189
GO:0034329	cell junction assembly	152	-0.339323	-1.35049	0.0299582	0.330973	0.308082	1968	tags=28%, list=22%, signal=22%	Sjc_0002542/Sjc_0003769/Sjc_0005005/Sjc_0003511/Sjc_0009205/Sjc_0007525/Sjc_0002424/Sjc_0006878/Sjc_0001280/Sjc_0000442/Sjc_0001623/Sjc_0005887/Sjc_0001318/Sjc_0003651/Sjc_0002823/Sjc_0004657/Sjc_0000731/Sjc_0008878/Sjc_0006095/Sjc_0002380/Sjc_0004304/Sjc_0005006/Sjc_0003038/Sjc_0002174/Sjc_0006710/Sjc_0001412/Sjc_0009375/Sjc_0002342/Sjc_0000868/Sjc_0005661/Sjc_0002791/Sjc_0005111/Sjc_0006908/Sjc…
GO:0045927	positive regulation of growth	237	-0.308036	-1.30822	0.0299612	0.330973	0.308082	2802	tags=37%, list=32%, signal=26%	Sjc_0007582/Sjc_0005180/Sjc_0009026/Sjc_0006342/Sjc_0000305/Sjc_0006985/Sjc_0005181/Sjc_0004727/Sjc_0005169/Sjc_0008287/Sjc_0008544/Sjc_0003305/Sjc_0009031/Sjc_0001734/Sjc_0004530/Sjc_0005216/Sjc_0002553/Sjc_0007300/Sjc_0006927/Sjc_0003150/Sjc_0004746/Sjc_0002455/Sjc_0000639/Sjc_0002417/Sjc_0001653/Sjc_0003095/Sjc_0001807/Sjc_0009232/Sjc_0004253/Sjc_0006142/Sjc_0000079/Sjc_0008083/Sjc_0003426/Sjc…
GO:0019722	calcium-mediated signaling	97	-0.375007	-1.39184	0.0302289	0.331169	0.308264	1700	tags=31%, list=19%, signal=25%	Sjc_0001236/Sjc_0006235/Sjc_0007942/Sjc_0001555/Sjc_0001548/Sjc_0006623/Sjc_0005072/Sjc_0002490/Sjc_0005456/Sjc_0001976/Sjc_0008960/Sjc_0003038/Sjc_0007377/Sjc_0003306/Sjc_0001396/Sjc_0002935/Sjc_0008962/Sjc_0006908/Sjc_0002491/Sjc_0001979/Sjc_0008280/Sjc_0002621/Sjc_0009705/Sjc_0001877/Sjc_0008961/Sjc_0002622/Sjc_0006237/Sjc_0009704/Sjc_0001878/Sjc_0008804
GO:0070193	synaptonemal complex organization	17	0.729135	1.83538	0.0306152	0.331234	0.308324	1076	tags=29%, list=12%, signal=26%	Sjc_0004478/Sjc_0004313/Sjc_0002314/Sjc_0003197/Sjc_0004423
GO:0045143	homologous chromosome segregation	38	0.581213	1.67129	0.0307007	0.331234	0.308324	860	tags=21%, list=10%, signal=19%	Sjc_0004478/Sjc_0005839/Sjc_0006384/Sjc_0004313/Sjc_0006385/Sjc_0002314/Sjc_0003542/Sjc_0003197
GO:0098659	inorganic cation import across plasma membrane	26	-0.538878	-1.56631	0.030424	0.331234	0.308324	1092	tags=31%, list=12%, signal=27%	Sjc_0000749/Sjc_0001396/Sjc_0000748/Sjc_0005238/Sjc_0006237/Sjc_0000272/Sjc_0000190/Sjc_0000189
GO:0099587	inorganic ion import across plasma membrane	26	-0.538878	-1.56631	0.030424	0.331234	0.308324	1092	tags=31%, list=12%, signal=27%	Sjc_0000749/Sjc_0001396/Sjc_0000748/Sjc_0005238/Sjc_0006237/Sjc_0000272/Sjc_0000190/Sjc_0000189
GO:0035096	larval midgut cell programmed cell death	20	-0.571483	-1.55937	0.0305536	0.331234	0.308324	1572	tags=45%, list=18%, signal=37%	Sjc_0005965/Sjc_0005398/Sjc_0002146/Sjc_0004761/Sjc_0000589/Sjc_0003515/Sjc_0008812/Sjc_0000590/Sjc_0007073
GO:0019079	viral genome replication	52	-0.431762	-1.43039	0.0306368	0.331234	0.308324	2714	tags=44%, list=31%, signal=31%	Sjc_0006566/Sjc_0004791/Sjc_0001472/Sjc_0008990/Sjc_0004990/Sjc_0008955/Sjc_0004202/Sjc_0008920/Sjc_0003769/Sjc_0003001/Sjc_0008449/Sjc_0007778/Sjc_0006194/Sjc_0007144/Sjc_0005428/Sjc_0006499/Sjc_0006710/Sjc_0001137/Sjc_0004665/Sjc_0003515/Sjc_0003432/Sjc_0003431/Sjc_0008906
GO:0030029	actin filament-based process	380	-0.273854	-1.24087	0.0307316	0.331234	0.308324	2610	tags=34%, list=30%, signal=25%	Sjc_0000338/Sjc_0006406/Sjc_0002879/Sjc_0005216/Sjc_0002553/Sjc_0001589/Sjc_0006350/Sjc_0008847/Sjc_0006780/Sjc_0003491/Sjc_0003196/Sjc_0009457/Sjc_0001150/Sjc_0004525/Sjc_0001750/Sjc_0005335/Sjc_0004924/Sjc_0005480/Sjc_0000829/Sjc_0007238/Sjc_0006858/Sjc_0005361/Sjc_0000639/Sjc_0000110/Sjc_0004680/Sjc_0003095/Sjc_0008062/Sjc_0005919/Sjc_0005479/Sjc_0001425/Sjc_0002672/Sjc_0009040/Sjc_0006071/Sjc…
GO:0007422	peripheral nervous system development	74	-0.417043	-1.48704	0.0308112	0.331327	0.308411	1150	tags=26%, list=13%, signal=23%	Sjc_0008960/Sjc_0001274/Sjc_0000451/Sjc_0009770/Sjc_0003306/Sjc_0006931/Sjc_0002935/Sjc_0007619/Sjc_0008962/Sjc_0002791/Sjc_0009705/Sjc_0008961/Sjc_0007982/Sjc_0003645/Sjc_0000760/Sjc_0009704/Sjc_0009219/Sjc_0009285/Sjc_0000306
GO:0032527	protein exit from endoplasmic reticulum	31	-0.510548	-1.53158	0.0309478	0.332031	0.309066	1411	tags=32%, list=16%, signal=27%	Sjc_0009374/Sjc_0008728/Sjc_0005082/Sjc_0001672/Sjc_0003232/Sjc_0005432/Sjc_0004983/Sjc_0008484/Sjc_0003515/Sjc_0006587
GO:0007449	proximal/distal pattern formation, imaginal disc	15	-0.607268	-1.52617	0.031573	0.334889	0.311726	1150	tags=47%, list=13%, signal=41%	Sjc_0008960/Sjc_0003306/Sjc_0002935/Sjc_0008962/Sjc_0009705/Sjc_0008961/Sjc_0009704
GO:0007479	leg disc proximal/distal pattern formation	15	-0.607268	-1.52617	0.031573	0.334889	0.311726	1150	tags=47%, list=13%, signal=41%	Sjc_0008960/Sjc_0003306/Sjc_0002935/Sjc_0008962/Sjc_0009705/Sjc_0008961/Sjc_0009704
GO:1901184	regulation of ERBB signaling pathway	75	-0.404192	-1.44267	0.0314875	0.334889	0.311726	1738	tags=29%, list=20%, signal=24%	Sjc_0000816/Sjc_0008774/Sjc_0009452/Sjc_0002978/Sjc_0002803/Sjc_0008960/Sjc_0003590/Sjc_0003306/Sjc_0005773/Sjc_0002935/Sjc_0004419/Sjc_0000868/Sjc_0008962/Sjc_0005111/Sjc_0000867/Sjc_0001942/Sjc_0002621/Sjc_0009705/Sjc_0008961/Sjc_0002622/Sjc_0005748/Sjc_0009704
GO:0008015	blood circulation	174	-0.346701	-1.41705	0.0314103	0.334889	0.311726	1768	tags=29%, list=20%, signal=24%	Sjc_0002583/Sjc_0007937/Sjc_0007065/Sjc_0001680/Sjc_0007586/Sjc_0006235/Sjc_0001280/Sjc_0001555/Sjc_0006623/Sjc_0002069/Sjc_0007029/Sjc_0005072/Sjc_0002388/Sjc_0007314/Sjc_0001169/Sjc_0005456/Sjc_0005006/Sjc_0006147/Sjc_0008960/Sjc_0003038/Sjc_0000749/Sjc_0007176/Sjc_0003371/Sjc_0003306/Sjc_0001396/Sjc_0000748/Sjc_0002935/Sjc_0004195/Sjc_0003673/Sjc_0005238/Sjc_0008962/Sjc_0001284/Sjc_0004631/Sjc…
GO:0043066	negative regulation of apoptotic process	353	-0.28044	-1.26314	0.0315327	0.334889	0.311726	1768	tags=25%, list=20%, signal=21%	Sjc_0002583/Sjc_0003644/Sjc_0005242/Sjc_0006613/Sjc_0001236/Sjc_0001293/Sjc_0003148/Sjc_0001280/Sjc_0008387/Sjc_0003523/Sjc_0003996/Sjc_0000042/Sjc_0001318/Sjc_0008263/Sjc_0002661/Sjc_0000369/Sjc_0001254/Sjc_0000643/Sjc_0000731/Sjc_0002835/Sjc_0007144/Sjc_0002388/Sjc_0005677/Sjc_0007340/Sjc_0003914/Sjc_0005342/Sjc_0003454/Sjc_0002490/Sjc_0009249/Sjc_0005082/Sjc_0005006/Sjc_0003647/Sjc_0007343/Sjc…
GO:0009065	glutamine family amino acid catabolic process	12	-0.656943	-1.60796	0.0317273	0.335131	0.311951	2624	tags=92%, list=30%, signal=64%	Sjc_0005815/Sjc_0007056/Sjc_0004417/Sjc_0003109/Sjc_0006681/Sjc_0007057/Sjc_0008550/Sjc_0001293/Sjc_0006235/Sjc_0007290/Sjc_0006237
GO:0050999	regulation of nitric-oxide synthase activity	28	-0.529425	-1.57166	0.031883	0.335131	0.311951	1689	tags=46%, list=19%, signal=38%	Sjc_0001293/Sjc_0006235/Sjc_0004137/Sjc_0008960/Sjc_0003306/Sjc_0002935/Sjc_0008962/Sjc_0002621/Sjc_0009705/Sjc_0008961/Sjc_0002622/Sjc_0006237/Sjc_0009704
GO:0032930	positive regulation of superoxide anion generation	14	-0.610314	-1.52135	0.0318558	0.335131	0.311951	1150	tags=57%, list=13%, signal=50%	Sjc_0008960/Sjc_0003306/Sjc_0002935/Sjc_0008962/Sjc_0002015/Sjc_0009705/Sjc_0008961/Sjc_0009704
GO:0033085	negative regulation of T cell differentiation in thymus	14	-0.610097	-1.52081	0.0318558	0.335131	0.311951	1150	tags=50%, list=13%, signal=44%	Sjc_0008960/Sjc_0003306/Sjc_0002935/Sjc_0008962/Sjc_0009705/Sjc_0008961/Sjc_0009704
GO:0006721	terpenoid metabolic process	13	-0.63654	-1.58818	0.0320934	0.336584	0.313304	895	tags=23%, list=10%, signal=21%	Sjc_0007327/Sjc_0006882/Sjc_0006881
GO:0032768	regulation of monooxygenase activity	30	-0.510337	-1.53118	0.0322388	0.336596	0.313316	1689	tags=43%, list=19%, signal=35%	Sjc_0001293/Sjc_0006235/Sjc_0004137/Sjc_0008960/Sjc_0003306/Sjc_0002935/Sjc_0008962/Sjc_0002621/Sjc_0009705/Sjc_0008961/Sjc_0002622/Sjc_0006237/Sjc_0009704
GO:0045453	bone resorption	31	-0.506652	-1.51989	0.032195	0.336596	0.313316	1880	tags=48%, list=21%, signal=38%	Sjc_0001329/Sjc_0000816/Sjc_0001236/Sjc_0007942/Sjc_0000033/Sjc_0008960/Sjc_0003038/Sjc_0003306/Sjc_0002935/Sjc_0008962/Sjc_0002621/Sjc_0009705/Sjc_0008961/Sjc_0002622/Sjc_0009704
GO:0031670	cellular response to nutrient	28	-0.52821	-1.56806	0.032468	0.337981	0.314605	1880	tags=36%, list=21%, signal=28%	Sjc_0001329/Sjc_0001236/Sjc_0006235/Sjc_0005072/Sjc_0005082/Sjc_0001890/Sjc_0007728/Sjc_0001877/Sjc_0006237/Sjc_0001878
GO:1901185	negative regulation of ERBB signaling pathway	61	-0.433329	-1.47991	0.0325163	0.337981	0.314605	1738	tags=33%, list=20%, signal=26%	Sjc_0000816/Sjc_0008774/Sjc_0009452/Sjc_0002978/Sjc_0002803/Sjc_0008960/Sjc_0003306/Sjc_0005773/Sjc_0002935/Sjc_0004419/Sjc_0000868/Sjc_0008962/Sjc_0000867/Sjc_0001942/Sjc_0002621/Sjc_0009705/Sjc_0008961/Sjc_0002622/Sjc_0005748/Sjc_0009704
GO:0086009	membrane repolarization	19	-0.560832	-1.51249	0.0328515	0.339199	0.315738	1471	tags=37%, list=17%, signal=31%	Sjc_0004657/Sjc_0005006/Sjc_0000749/Sjc_0000748/Sjc_0005810/Sjc_0000256/Sjc_0008804
GO:0000381	regulation of alternative mRNA splicing, via spliceosome	74	-0.414686	-1.47863	0.0327883	0.339199	0.315738	1859	tags=36%, list=21%, signal=29%	Sjc_0000310/Sjc_0007645/Sjc_0002087/Sjc_0008986/Sjc_0008939/Sjc_0001592/Sjc_0001577/Sjc_0007144/Sjc_0007820/Sjc_0008814/Sjc_0002421/Sjc_0007272/Sjc_0001828/Sjc_0007527/Sjc_0007715/Sjc_0001720/Sjc_0003799/Sjc_0000825/Sjc_0003348/Sjc_0003223/Sjc_0001805/Sjc_0004509/Sjc_0003170/Sjc_0003356/Sjc_0001346/Sjc_0006712/Sjc_0005509
GO:0007033	vacuole organization	108	-0.369401	-1.40302	0.0327266	0.339199	0.315738	2315	tags=32%, list=26%, signal=24%	Sjc_0005965/Sjc_0004271/Sjc_0009360/Sjc_0008062/Sjc_0005919/Sjc_0004253/Sjc_0006142/Sjc_0006071/Sjc_0005464/Sjc_0006033/Sjc_0004735/Sjc_0008232/Sjc_0001062/Sjc_0005113/Sjc_0000816/Sjc_0001680/Sjc_0008774/Sjc_0006116/Sjc_0001623/Sjc_0001318/Sjc_0002146/Sjc_0001254/Sjc_0003121/Sjc_0005687/Sjc_0000589/Sjc_0005286/Sjc_0005299/Sjc_0002485/Sjc_0001291/Sjc_0005874/Sjc_0003515/Sjc_0008812/Sjc_0000590/Sjc…
GO:0051767	nitric-oxide synthase biosynthetic process	11	0.728965	1.65886	0.0340226	0.347564	0.323525	606	tags=18%, list=7%, signal=17%	Sjc_0004478/Sjc_0004313
GO:0051769	regulation of nitric-oxide synthase biosynthetic process	11	0.728965	1.65886	0.0340226	0.347564	0.323525	606	tags=18%, list=7%, signal=17%	Sjc_0004478/Sjc_0004313
GO:0048143	astrocyte activation	13	-0.634011	-1.58187	0.0344063	0.347564	0.323525	1150	tags=54%, list=13%, signal=47%	Sjc_0008960/Sjc_0003306/Sjc_0002935/Sjc_0008962/Sjc_0009705/Sjc_0008961/Sjc_0009704
GO:1902253	regulation of intrinsic apoptotic signaling pathway by p53 class mediator	13	-0.633579	-1.58079	0.0344063	0.347564	0.323525	1416	tags=46%, list=16%, signal=39%	Sjc_0005677/Sjc_0003914/Sjc_0005497/Sjc_0007923/Sjc_0009285/Sjc_0000306
GO:0009409	response to cold	21	-0.572322	-1.56702	0.0339198	0.347564	0.323525	1679	tags=43%, list=19%, signal=35%	Sjc_0006235/Sjc_0001594/Sjc_0002388/Sjc_0002490/Sjc_0005700/Sjc_0004929/Sjc_0000575/Sjc_0002491/Sjc_0006237
GO:0000387	spliceosomal snRNP assembly	28	-0.5221	-1.54992	0.034223	0.347564	0.323525	1049	tags=50%, list=12%, signal=44%	Sjc_0004318/Sjc_0001350/Sjc_0003131/Sjc_0009114/Sjc_0007133/Sjc_0001479/Sjc_0005922/Sjc_0002847/Sjc_0007619/Sjc_0003799/Sjc_0008229/Sjc_0003578/Sjc_0007970/Sjc_0005509
GO:0050729	positive regulation of inflammatory response	25	-0.539692	-1.54089	0.0341836	0.347564	0.323525	1456	tags=52%, list=17%, signal=44%	Sjc_0002437/Sjc_0001696/Sjc_0007343/Sjc_0000033/Sjc_0008960/Sjc_0003038/Sjc_0005700/Sjc_0003306/Sjc_0002935/Sjc_0008962/Sjc_0009705/Sjc_0008961/Sjc_0009704
GO:0030203	glycosaminoglycan metabolic process	27	-0.507468	-1.49008	0.0343736	0.347564	0.323525	187	tags=33%, list=2%, signal=33%	Sjc_0003871/Sjc_0001362/Sjc_0003016/Sjc_0003028/Sjc_0000447/Sjc_0003286/Sjc_0006882/Sjc_0006881/Sjc_0003316
GO:0032801	receptor catabolic process	24	-0.516917	-1.46058	0.0341279	0.347564	0.323525	2363	tags=50%, list=27%, signal=37%	Sjc_0004334/Sjc_0008409/Sjc_0004253/Sjc_0005398/Sjc_0006101/Sjc_0001685/Sjc_0002803/Sjc_0001274/Sjc_0005286/Sjc_0006099/Sjc_0006100/Sjc_0003375
GO:0042176	regulation of protein catabolic process	233	-0.310804	-1.32078	0.0342125	0.347564	0.323525	1897	tags=29%, list=22%, signal=23%	Sjc_0006033/Sjc_0008232/Sjc_0004985/Sjc_0005254/Sjc_0000997/Sjc_0000816/Sjc_0009315/Sjc_0006101/Sjc_0005536/Sjc_0000227/Sjc_0003996/Sjc_0005887/Sjc_0008263/Sjc_0005935/Sjc_0007687/Sjc_0003931/Sjc_0002835/Sjc_0007144/Sjc_0005677/Sjc_0009374/Sjc_0000271/Sjc_0002978/Sjc_0001372/Sjc_0005006/Sjc_0006453/Sjc_0008960/Sjc_0003038/Sjc_0001313/Sjc_0001299/Sjc_0000150/Sjc_0007176/Sjc_0005286/Sjc_0003232/Sjc…
GO:0016057	regulation of membrane potential in photoreceptor cell	10	-0.669587	-1.55435	0.0345012	0.34777	0.323716	2915	tags=100%, list=33%, signal=67%	Sjc_0005809/Sjc_0006927/Sjc_0001653/Sjc_0003426/Sjc_0001590/Sjc_0005238/Sjc_0005810/Sjc_0000256/Sjc_0000190
GO:0001742	oenocyte differentiation	14	-0.608313	-1.51636	0.0348329	0.350356	0.326124	1680	tags=64%, list=19%, signal=52%	Sjc_0008986/Sjc_0007272/Sjc_0008960/Sjc_0003306/Sjc_0002935/Sjc_0008962/Sjc_0009705/Sjc_0008961/Sjc_0009704
GO:0045898	regulation of RNA polymerase II transcription preinitiation complex assembly	11	-0.648062	-1.55427	0.0354908	0.356205	0.331569	1641	tags=73%, list=19%, signal=59%	Sjc_0000227/Sjc_0006453/Sjc_0001299/Sjc_0004294/Sjc_0003971/Sjc_0005559/Sjc_0000927/Sjc_0006212
GO:0007129	homologous chromosome pairing at meiosis	27	0.628138	1.70023	0.0364569	0.357501	0.332775	860	tags=22%, list=10%, signal=20%	Sjc_0004478/Sjc_0005839/Sjc_0004313/Sjc_0002314/Sjc_0003542/Sjc_0003197
GO:0007421	stomatogastric nervous system development	12	-0.642921	-1.57364	0.0368721	0.357501	0.332775	1150	tags=58%, list=13%, signal=51%	Sjc_0008960/Sjc_0003306/Sjc_0002935/Sjc_0008962/Sjc_0009705/Sjc_0008961/Sjc_0009704
GO:0007473	wing disc proximal/distal pattern formation	12	-0.642921	-1.57364	0.0368721	0.357501	0.332775	1150	tags=58%, list=13%, signal=51%	Sjc_0008960/Sjc_0003306/Sjc_0002935/Sjc_0008962/Sjc_0009705/Sjc_0008961/Sjc_0009704
GO:0008071	maternal determination of dorsal/ventral axis, ovarian follicular epithelium, soma encoded	12	-0.642921	-1.57364	0.0368721	0.357501	0.332775	1150	tags=58%, list=13%, signal=51%	Sjc_0008960/Sjc_0003306/Sjc_0002935/Sjc_0008962/Sjc_0009705/Sjc_0008961/Sjc_0009704
GO:0010750	positive regulation of nitric oxide mediated signal transduction	12	-0.642921	-1.57364	0.0368721	0.357501	0.332775	1150	tags=58%, list=13%, signal=51%	Sjc_0008960/Sjc_0003306/Sjc_0002935/Sjc_0008962/Sjc_0009705/Sjc_0008961/Sjc_0009704
GO:0033087	negative regulation of immature T cell proliferation	12	-0.642921	-1.57364	0.0368721	0.357501	0.332775	1150	tags=58%, list=13%, signal=51%	Sjc_0008960/Sjc_0003306/Sjc_0002935/Sjc_0008962/Sjc_0009705/Sjc_0008961/Sjc_0009704
GO:0033088	negative regulation of immature T cell proliferation in thymus	12	-0.642921	-1.57364	0.0368721	0.357501	0.332775	1150	tags=58%, list=13%, signal=51%	Sjc_0008960/Sjc_0003306/Sjc_0002935/Sjc_0008962/Sjc_0009705/Sjc_0008961/Sjc_0009704
GO:0035202	tracheal pit formation in open tracheal system	12	-0.642921	-1.57364	0.0368721	0.357501	0.332775	1150	tags=58%, list=13%, signal=51%	Sjc_0008960/Sjc_0003306/Sjc_0002935/Sjc_0008962/Sjc_0009705/Sjc_0008961/Sjc_0009704
GO:0061029	eyelid development in camera-type eye	12	-0.642921	-1.57364	0.0368721	0.357501	0.332775	1150	tags=58%, list=13%, signal=51%	Sjc_0008960/Sjc_0003306/Sjc_0002935/Sjc_0008962/Sjc_0009705/Sjc_0008961/Sjc_0009704
GO:1902722	positive regulation of prolactin secretion	12	-0.642921	-1.57364	0.0368721	0.357501	0.332775	1150	tags=58%, list=13%, signal=51%	Sjc_0008960/Sjc_0003306/Sjc_0002935/Sjc_0008962/Sjc_0009705/Sjc_0008961/Sjc_0009704
GO:0043129	surfactant homeostasis	13	-0.629979	-1.57181	0.0367193	0.357501	0.332775	1150	tags=54%, list=13%, signal=47%	Sjc_0008960/Sjc_0003306/Sjc_0002935/Sjc_0008962/Sjc_0009705/Sjc_0008961/Sjc_0009704
GO:0035456	response to interferon-beta	10	-0.668373	-1.55154	0.0361842	0.357501	0.332775	1510	tags=50%, list=17%, signal=41%	Sjc_0006194/Sjc_0009374/Sjc_0004663/Sjc_0000413/Sjc_0000189
GO:0050850	positive regulation of calcium-mediated signaling	26	-0.528786	-1.53698	0.0369221	0.357501	0.332775	1617	tags=46%, list=18%, signal=38%	Sjc_0007942/Sjc_0001548/Sjc_0005072/Sjc_0008960/Sjc_0003306/Sjc_0002935/Sjc_0008962/Sjc_0001979/Sjc_0008280/Sjc_0009705/Sjc_0008961/Sjc_0009704
GO:0060148	positive regulation of post-transcriptional gene silencing	26	-0.528527	-1.53623	0.0369221	0.357501	0.332775	1429	tags=38%, list=16%, signal=32%	Sjc_0007144/Sjc_0001696/Sjc_0008960/Sjc_0003306/Sjc_0002935/Sjc_0008962/Sjc_0005808/Sjc_0009705/Sjc_0008961/Sjc_0009704
GO:1902669	positive regulation of axon guidance	17	-0.587454	-1.53385	0.0359525	0.357501	0.332775	1335	tags=65%, list=15%, signal=55%	Sjc_0007213/Sjc_0009171/Sjc_0008681/Sjc_0006300/Sjc_0006445/Sjc_0002799/Sjc_0009026/Sjc_0002490/Sjc_0002491/Sjc_0008682/Sjc_0008683
GO:0007477	notum development	15	-0.602945	-1.5153	0.0357826	0.357501	0.332775	1150	tags=47%, list=13%, signal=41%	Sjc_0008960/Sjc_0003306/Sjc_0002935/Sjc_0008962/Sjc_0009705/Sjc_0008961/Sjc_0009704
GO:0036503	ERAD pathway	63	-0.414896	-1.41975	0.0357034	0.357501	0.332775	1701	tags=37%, list=19%, signal=30%	Sjc_0007774/Sjc_0000227/Sjc_0006949/Sjc_0008321/Sjc_0007687/Sjc_0005465/Sjc_0009374/Sjc_0008728/Sjc_0004514/Sjc_0005082/Sjc_0006453/Sjc_0001672/Sjc_0001299/Sjc_0003232/Sjc_0004294/Sjc_0007209/Sjc_0000927/Sjc_0005432/Sjc_0007728/Sjc_0004983/Sjc_0008484/Sjc_0003515/Sjc_0006212
GO:1903861	positive regulation of dendrite extension	16	-0.59236	-1.52125	0.0372146	0.359587	0.334716	2760	tags=69%, list=31%, signal=47%	Sjc_0000305/Sjc_0009031/Sjc_0002417/Sjc_0009232/Sjc_0004253/Sjc_0006101/Sjc_0003386/Sjc_0006099/Sjc_0006100/Sjc_0009285/Sjc_0000306
GO:0043457	regulation of cellular respiration	17	-0.584853	-1.52706	0.0377353	0.362367	0.337304	1657	tags=29%, list=19%, signal=24%	Sjc_0000785/Sjc_0005149/Sjc_0002005/Sjc_0003515/Sjc_0007419
GO:1903800	positive regulation of production of miRNAs involved in gene silencing by miRNA	15	-0.60027	-1.50858	0.0375867	0.362367	0.337304	1150	tags=47%, list=13%, signal=41%	Sjc_0008960/Sjc_0003306/Sjc_0002935/Sjc_0008962/Sjc_0009705/Sjc_0008961/Sjc_0009704
GO:0055065	metal ion homeostasis	214	-0.313023	-1.30442	0.0376947	0.362367	0.337304	1860	tags=27%, list=21%, signal=22%	Sjc_0003147/Sjc_0003744/Sjc_0007013/Sjc_0002583/Sjc_0008787/Sjc_0006235/Sjc_0003938/Sjc_0006116/Sjc_0001555/Sjc_0001548/Sjc_0001318/Sjc_0006623/Sjc_0005149/Sjc_0002468/Sjc_0005072/Sjc_0007290/Sjc_0002388/Sjc_0001841/Sjc_0005456/Sjc_0003801/Sjc_0005082/Sjc_0007047/Sjc_0008960/Sjc_0003038/Sjc_0003836/Sjc_0007951/Sjc_0003232/Sjc_0000111/Sjc_0002997/Sjc_0003306/Sjc_0003810/Sjc_0002996/Sjc_0001396/Sjc…
GO:0048643	positive regulation of skeletal muscle tissue development	12	-0.641662	-1.57056	0.0380154	0.364308	0.339111	1335	tags=50%, list=15%, signal=42%	Sjc_0002490/Sjc_0000150/Sjc_0005286/Sjc_0002174/Sjc_0002491/Sjc_0004714
GO:1900019	regulation of protein kinase C activity	13	-0.625679	-1.56108	0.038454	0.367004	0.341621	1150	tags=54%, list=13%, signal=47%	Sjc_0008960/Sjc_0003306/Sjc_0002935/Sjc_0008962/Sjc_0009705/Sjc_0008961/Sjc_0009704
GO:1900020	positive regulation of protein kinase C activity	13	-0.625679	-1.56108	0.038454	0.367004	0.341621	1150	tags=54%, list=13%, signal=47%	Sjc_0008960/Sjc_0003306/Sjc_0002935/Sjc_0008962/Sjc_0009705/Sjc_0008961/Sjc_0009704
GO:0090313	regulation of protein targeting to membrane	28	-0.513972	-1.52579	0.0389029	0.370169	0.344567	1150	tags=36%, list=13%, signal=31%	Sjc_0008960/Sjc_0001274/Sjc_0003306/Sjc_0002935/Sjc_0008962/Sjc_0009235/Sjc_0009705/Sjc_0008961/Sjc_0009704/Sjc_0007295
GO:1901570	fatty acid derivative biosynthetic process	20	-0.557383	-1.5209	0.0390236	0.370169	0.344567	2202	tags=50%, list=25%, signal=38%	Sjc_0001807/Sjc_0004740/Sjc_0007942/Sjc_0002773/Sjc_0006577/Sjc_0002485/Sjc_0009110/Sjc_0006542/Sjc_0001389/Sjc_0001388
GO:0031581	hemidesmosome assembly	20	-0.557306	-1.52069	0.0390236	0.370169	0.344567	665	tags=35%, list=8%, signal=32%	Sjc_0005887/Sjc_0002380/Sjc_0002791/Sjc_0005111/Sjc_0006882/Sjc_0006881/Sjc_0006712
GO:0007445	determination of imaginal disc primordium	15	-0.599556	-1.50678	0.0393908	0.371121	0.345452	1150	tags=53%, list=13%, signal=46%	Sjc_0008960/Sjc_0003306/Sjc_0002935/Sjc_0008962/Sjc_0009705/Sjc_0008961/Sjc_0009704/Sjc_0009316
GO:0035225	determination of genital disc primordium	15	-0.599556	-1.50678	0.0393908	0.371121	0.345452	1150	tags=53%, list=13%, signal=46%	Sjc_0008960/Sjc_0003306/Sjc_0002935/Sjc_0008962/Sjc_0009705/Sjc_0008961/Sjc_0009704/Sjc_0009316
GO:0042058	regulation of epidermal growth factor receptor signaling pathway	74	-0.404484	-1.44226	0.0394081	0.371121	0.345452	1738	tags=30%, list=20%, signal=24%	Sjc_0000816/Sjc_0008774/Sjc_0009452/Sjc_0002978/Sjc_0002803/Sjc_0008960/Sjc_0003590/Sjc_0003306/Sjc_0005773/Sjc_0002935/Sjc_0004419/Sjc_0000868/Sjc_0008962/Sjc_0005111/Sjc_0000867/Sjc_0001942/Sjc_0002621/Sjc_0009705/Sjc_0008961/Sjc_0002622/Sjc_0005748/Sjc_0009704
GO:0014070	response to organic cyclic compound	437	-0.264938	-1.208	0.039442	0.371121	0.345452	1468	tags=20%, list=17%, signal=18%	Sjc_0009409/Sjc_0007991/Sjc_0005072/Sjc_0007290/Sjc_0007144/Sjc_0000668/Sjc_0009167/Sjc_0001169/Sjc_0007280/Sjc_0002490/Sjc_0004910/Sjc_0001696/Sjc_0009249/Sjc_0005082/Sjc_0003647/Sjc_0001029/Sjc_0009488/Sjc_0000225/Sjc_0001890/Sjc_0007047/Sjc_0008261/Sjc_0005428/Sjc_0008960/Sjc_0003038/Sjc_0001274/Sjc_0004017/Sjc_0009284/Sjc_0007176/Sjc_0005700/Sjc_0006480/Sjc_0002997/Sjc_0003306/Sjc_0005157/Sjc…
GO:0021889	olfactory bulb interneuron differentiation	19	-0.553368	-1.49236	0.0399543	0.375075	0.349133	1150	tags=42%, list=13%, signal=37%	Sjc_0008960/Sjc_0003306/Sjc_0002935/Sjc_0008962/Sjc_0006627/Sjc_0009705/Sjc_0008961/Sjc_0009704
GO:0005996	monosaccharide metabolic process	108	-0.365342	-1.38761	0.040023	0.375075	0.349133	1931	tags=32%, list=22%, signal=26%	Sjc_0008550/Sjc_0003286/Sjc_0001329/Sjc_0003543/Sjc_0001680/Sjc_0001236/Sjc_0004633/Sjc_0007119/Sjc_0007290/Sjc_0005165/Sjc_0001169/Sjc_0002490/Sjc_0001890/Sjc_0009284/Sjc_0007176/Sjc_0004929/Sjc_0001934/Sjc_0005974/Sjc_0003810/Sjc_0000560/Sjc_0000303/Sjc_0008801/Sjc_0005478/Sjc_0003673/Sjc_0001512/Sjc_0007792/Sjc_0005424/Sjc_0004045/Sjc_0002491/Sjc_0001904/Sjc_0001724/Sjc_0006464/Sjc_0007073/Sjc…
GO:0071318	cellular response to ATP	10	-0.662425	-1.53773	0.0401111	0.375147	0.3492	1450	tags=40%, list=16%, signal=33%	Sjc_0005072/Sjc_0005082/Sjc_0001877/Sjc_0001878
GO:0061026	cardiac muscle tissue regeneration	14	-0.603945	-1.50548	0.0401917	0.375149	0.349202	1150	tags=50%, list=13%, signal=44%	Sjc_0008960/Sjc_0003306/Sjc_0002935/Sjc_0008962/Sjc_0009705/Sjc_0008961/Sjc_0009704
GO:0006084	acetyl-CoA metabolic process	19	-0.548156	-1.4783	0.0411381	0.382505	0.356049	1880	tags=47%, list=21%, signal=37%	Sjc_0001329/Sjc_0001236/Sjc_0003115/Sjc_0007032/Sjc_0004570/Sjc_0005414/Sjc_0003021/Sjc_0003114/Sjc_0001507
GO:0030003	cellular cation homeostasis	218	-0.321984	-1.35019	0.0411437	0.382505	0.356049	2138	tags=32%, list=24%, signal=25%	Sjc_0005261/Sjc_0003967/Sjc_0007543/Sjc_0008111/Sjc_0006041/Sjc_0005455/Sjc_0008920/Sjc_0003783/Sjc_0007424/Sjc_0003147/Sjc_0003744/Sjc_0007013/Sjc_0002583/Sjc_0000816/Sjc_0008787/Sjc_0006235/Sjc_0003938/Sjc_0006116/Sjc_0001555/Sjc_0001548/Sjc_0001318/Sjc_0006623/Sjc_0005149/Sjc_0002468/Sjc_0005072/Sjc_0007290/Sjc_0004620/Sjc_0001841/Sjc_0005456/Sjc_0003801/Sjc_0005082/Sjc_0001824/Sjc_0007335/Sjc…
GO:0019682	glyceraldehyde-3-phosphate metabolic process	17	-0.580168	-1.51483	0.041895	0.388715	0.36183	2249	tags=53%, list=26%, signal=39%	Sjc_0007797/Sjc_0002746/Sjc_0001605/Sjc_0007119/Sjc_0001169/Sjc_0000560/Sjc_0008801/Sjc_0001904/Sjc_0006464
GO:2000637	positive regulation of miRNA-mediated gene silencing	25	-0.529444	-1.51163	0.0432586	0.400572	0.372866	1429	tags=40%, list=16%, signal=34%	Sjc_0007144/Sjc_0001696/Sjc_0008960/Sjc_0003306/Sjc_0002935/Sjc_0008962/Sjc_0005808/Sjc_0009705/Sjc_0008961/Sjc_0009704
GO:0086012	membrane depolarization during cardiac muscle cell action potential	13	-0.618885	-1.54413	0.0436583	0.401101	0.373359	867	tags=38%, list=10%, signal=35%	Sjc_0001396/Sjc_0005238/Sjc_0008804/Sjc_0000190/Sjc_0000189
GO:0032431	activation of phospholipase A2 activity	13	-0.617122	-1.53973	0.0436583	0.401101	0.373359	1150	tags=54%, list=13%, signal=47%	Sjc_0008960/Sjc_0003306/Sjc_0002935/Sjc_0008962/Sjc_0009705/Sjc_0008961/Sjc_0009704
GO:0035088	establishment or maintenance of apical/basal cell polarity	68	-0.401554	-1.40111	0.0436596	0.401101	0.373359	2641	tags=43%, list=30%, signal=30%	Sjc_0003305/Sjc_0000338/Sjc_0008021/Sjc_0008847/Sjc_0006606/Sjc_0004746/Sjc_0005361/Sjc_0003426/Sjc_0007087/Sjc_0003511/Sjc_0001280/Sjc_0003651/Sjc_0004657/Sjc_0002490/Sjc_0001901/Sjc_0008960/Sjc_0004471/Sjc_0003590/Sjc_0003306/Sjc_0002935/Sjc_0008962/Sjc_0002491/Sjc_0009235/Sjc_0001942/Sjc_0009705/Sjc_0008961/Sjc_0008018/Sjc_0009704/Sjc_0005357
GO:0061245	establishment or maintenance of bipolar cell polarity	68	-0.401554	-1.40111	0.0436596	0.401101	0.373359	2641	tags=43%, list=30%, signal=30%	Sjc_0003305/Sjc_0000338/Sjc_0008021/Sjc_0008847/Sjc_0006606/Sjc_0004746/Sjc_0005361/Sjc_0003426/Sjc_0007087/Sjc_0003511/Sjc_0001280/Sjc_0003651/Sjc_0004657/Sjc_0002490/Sjc_0001901/Sjc_0008960/Sjc_0004471/Sjc_0003590/Sjc_0003306/Sjc_0002935/Sjc_0008962/Sjc_0002491/Sjc_0009235/Sjc_0001942/Sjc_0009705/Sjc_0008961/Sjc_0008018/Sjc_0009704/Sjc_0005357
GO:0006465	signal peptide processing	10	-0.654479	-1.51928	0.044038	0.403782	0.375855	2448	tags=90%, list=28%, signal=65%	Sjc_0006936/Sjc_0008212/Sjc_0003838/Sjc_0009443/Sjc_0006101/Sjc_0003692/Sjc_0006099/Sjc_0006100/Sjc_0004709
GO:0032799	low-density lipoprotein receptor particle metabolic process	15	-0.592071	-1.48797	0.0442018	0.40449	0.376514	1715	tags=47%, list=19%, signal=38%	Sjc_0006101/Sjc_0001685/Sjc_0006099/Sjc_0006100/Sjc_0003375/Sjc_0009285/Sjc_0000306
GO:0050891	multicellular organismal water homeostasis	16	-0.58426	-1.50045	0.0443596	0.40514	0.377118	2547	tags=50%, list=29%, signal=36%	Sjc_0009408/Sjc_0004401/Sjc_0009407/Sjc_0006904/Sjc_0009409/Sjc_0002794/Sjc_0009411/Sjc_0004409
GO:0060021	roof of mouth development	25	-0.527657	-1.50653	0.0444687	0.405342	0.377307	1085	tags=16%, list=12%, signal=14%	Sjc_0009131/Sjc_0005497/Sjc_0006587/Sjc_0007419
GO:0043552	positive regulation of phosphatidylinositol 3-kinase activity	21	-0.553191	-1.51464	0.0449206	0.408663	0.380398	1150	tags=43%, list=13%, signal=37%	Sjc_0008960/Sjc_0003306/Sjc_0002935/Sjc_0008962/Sjc_0002621/Sjc_0009705/Sjc_0008961/Sjc_0002622/Sjc_0009704
GO:0001825	blastocyst formation	30	0.654517	1.81339	0.0451338	0.409804	0.38146	570	tags=30%, list=6%, signal=28%	Sjc_0009528/Sjc_0002215/Sjc_0009527/Sjc_0009524/Sjc_0005604/Sjc_0009683/Sjc_0009515/Sjc_0005602/Sjc_0005857
GO:0090218	positive regulation of lipid kinase activity	22	-0.544569	-1.5103	0.0456631	0.410756	0.382346	1345	tags=59%, list=15%, signal=50%	Sjc_0004253/Sjc_0005398/Sjc_0003744/Sjc_0000271/Sjc_0008960/Sjc_0003306/Sjc_0002935/Sjc_0008962/Sjc_0002621/Sjc_0009705/Sjc_0008961/Sjc_0002622/Sjc_0009704
GO:0030539	male genitalia development	25	-0.527149	-1.50508	0.0456787	0.410756	0.382346	1150	tags=32%, list=13%, signal=28%	Sjc_0008960/Sjc_0003306/Sjc_0002935/Sjc_0008962/Sjc_0001942/Sjc_0009705/Sjc_0008961/Sjc_0009704
GO:0033081	regulation of T cell differentiation in thymus	20	-0.55157	-1.50504	0.0456787	0.410756	0.382346	1150	tags=40%, list=13%, signal=35%	Sjc_0008960/Sjc_0003306/Sjc_0002935/Sjc_0008962/Sjc_0001979/Sjc_0009705/Sjc_0008961/Sjc_0009704
GO:0006376	mRNA splice site selection	22	-0.542505	-1.50458	0.0456631	0.410756	0.382346	1066	tags=45%, list=12%, signal=40%	Sjc_0007165/Sjc_0000310/Sjc_0001592/Sjc_0001879/Sjc_0002428/Sjc_0003799/Sjc_0002401/Sjc_0003348/Sjc_0001346/Sjc_0005509
GO:0021551	central nervous system morphogenesis	17	-0.573597	-1.49767	0.0454604	0.410756	0.382346	1150	tags=47%, list=13%, signal=41%	Sjc_0008960/Sjc_0003306/Sjc_0002935/Sjc_0008962/Sjc_0009705/Sjc_0008961/Sjc_0009704/Sjc_0009316
GO:2000377	regulation of reactive oxygen species metabolic process	75	-0.391143	-1.3961	0.0458741	0.41172	0.383244	1700	tags=36%, list=19%, signal=29%	Sjc_0001236/Sjc_0001293/Sjc_0006235/Sjc_0001280/Sjc_0007942/Sjc_0004696/Sjc_0005072/Sjc_0002388/Sjc_0009167/Sjc_0000271/Sjc_0001169/Sjc_0008960/Sjc_0005700/Sjc_0003306/Sjc_0002935/Sjc_0008962/Sjc_0008280/Sjc_0003223/Sjc_0002015/Sjc_0002621/Sjc_0009705/Sjc_0008961/Sjc_0002622/Sjc_0006237/Sjc_0009704/Sjc_0009349/Sjc_0003139
GO:0032429	regulation of phospholipase A2 activity	17	-0.572381	-1.4945	0.0460547	0.412547	0.384014	1487	tags=53%, list=17%, signal=44%	Sjc_0003386/Sjc_0008960/Sjc_0002485/Sjc_0003306/Sjc_0002935/Sjc_0008962/Sjc_0009705/Sjc_0008961/Sjc_0009704
GO:0032026	response to magnesium ion	10	-0.651037	-1.51129	0.0462819	0.413789	0.385169	447	tags=20%, list=5%, signal=19%	Sjc_0001877/Sjc_0001878
GO:0033083	regulation of immature T cell proliferation	13	-0.615187	-1.5349	0.0465495	0.413803	0.385182	1150	tags=54%, list=13%, signal=47%	Sjc_0008960/Sjc_0003306/Sjc_0002935/Sjc_0008962/Sjc_0009705/Sjc_0008961/Sjc_0009704
GO:0033084	regulation of immature T cell proliferation in thymus	13	-0.615187	-1.5349	0.0465495	0.413803	0.385182	1150	tags=54%, list=13%, signal=47%	Sjc_0008960/Sjc_0003306/Sjc_0002935/Sjc_0008962/Sjc_0009705/Sjc_0008961/Sjc_0009704
GO:0033137	negative regulation of peptidyl-serine phosphorylation	11	-0.638681	-1.53177	0.0464684	0.413803	0.385182	794	tags=36%, list=9%, signal=33%	Sjc_0003673/Sjc_0005445/Sjc_0005447/Sjc_0008906
GO:0042554	superoxide anion generation	16	-0.58102	-1.49213	0.0467413	0.414718	0.386034	1617	tags=62%, list=18%, signal=51%	Sjc_0007942/Sjc_0002388/Sjc_0008960/Sjc_0003306/Sjc_0002935/Sjc_0008962/Sjc_0002015/Sjc_0009705/Sjc_0008961/Sjc_0009704
GO:0045620	negative regulation of lymphocyte differentiation	20	-0.54814	-1.49568	0.0468887	0.415236	0.386517	1185	tags=40%, list=13%, signal=35%	Sjc_0004960/Sjc_0008960/Sjc_0003306/Sjc_0002935/Sjc_0008962/Sjc_0009705/Sjc_0008961/Sjc_0009704
GO:0097734	extracellular exosome biogenesis	13	-0.612006	-1.52697	0.047706	0.419292	0.390292	2525	tags=54%, list=29%, signal=38%	Sjc_0003677/Sjc_0005361/Sjc_0000816/Sjc_0009452/Sjc_0002978/Sjc_0008172/Sjc_0005357
GO:0140112	extracellular vesicle biogenesis	13	-0.612006	-1.52697	0.047706	0.419292	0.390292	2525	tags=54%, list=29%, signal=38%	Sjc_0003677/Sjc_0005361/Sjc_0000816/Sjc_0009452/Sjc_0002978/Sjc_0008172/Sjc_0005357
GO:1990182	exosomal secretion	13	-0.612006	-1.52697	0.047706	0.419292	0.390292	2525	tags=54%, list=29%, signal=38%	Sjc_0003677/Sjc_0005361/Sjc_0000816/Sjc_0009452/Sjc_0002978/Sjc_0008172/Sjc_0005357
GO:0019320	hexose catabolic process	25	-0.523414	-1.49441	0.0474937	0.419292	0.390292	1136	tags=48%, list=13%, signal=42%	Sjc_0009284/Sjc_0001934/Sjc_0005974/Sjc_0000303/Sjc_0008801/Sjc_0005478/Sjc_0001512/Sjc_0007792/Sjc_0005424/Sjc_0004045/Sjc_0001904/Sjc_0005423
GO:0045292	mRNA cis splicing, via spliceosome	16	-0.579582	-1.48844	0.0479322	0.420488	0.391405	1888	tags=44%, list=21%, signal=34%	Sjc_0007547/Sjc_0000310/Sjc_0000559/Sjc_0003446/Sjc_0003799/Sjc_0001346/Sjc_0005509
GO:0035309	wing and notum subfield formation	20	-0.545141	-1.48749	0.0480987	0.421157	0.392028	1150	tags=45%, list=13%, signal=39%	Sjc_0008960/Sjc_0003306/Sjc_0005497/Sjc_0002935/Sjc_0008962/Sjc_0009705/Sjc_0008961/Sjc_0009704/Sjc_0009316
GO:0006312	mitotic recombination	15	0.662898	1.64126	0.0482186	0.421416	0.392269	2789	tags=87%, list=32%, signal=59%	Sjc_0006384/Sjc_0006396/Sjc_0006385/Sjc_0005364/Sjc_0004835/Sjc_0002074/Sjc_0002757/Sjc_0005799/Sjc_0007812/Sjc_0006224/Sjc_0000802/Sjc_0002893/Sjc_0001076
GO:0006107	oxaloacetate metabolic process	11	-0.634184	-1.52098	0.0483271	0.421575	0.392417	1931	tags=73%, list=22%, signal=57%	Sjc_0007686/Sjc_0008550/Sjc_0007290/Sjc_0009284/Sjc_0008953/Sjc_0004570/Sjc_0006393/Sjc_0001724
GO:0002762	negative regulation of myeloid leukocyte differentiation	13	-0.610302	-1.52271	0.0488625	0.42545	0.396024	110	tags=23%, list=1%, signal=23%	Sjc_0006710/Sjc_0008892/Sjc_0007419
GO:0015988	energy coupled proton transmembrane transport, against electrochemical gradient	15	-0.585677	-1.4719	0.0490129	0.425965	0.396503	1377	tags=73%, list=16%, signal=62%	Sjc_0009191/Sjc_0008111/Sjc_0004620/Sjc_0000770/Sjc_0008820/Sjc_0007951/Sjc_0005299/Sjc_0002996/Sjc_0008547/Sjc_0005874/Sjc_0007207
GO:0051702	biological process involved in interaction with symbiont	29	-0.498357	-1.48792	0.0492126	0.426906	0.397379	2804	tags=52%, list=32%, signal=35%	Sjc_0007414/Sjc_0006566/Sjc_0008955/Sjc_0004924/Sjc_0004202/Sjc_0008920/Sjc_0001293/Sjc_0007144/Sjc_0006453/Sjc_0005123/Sjc_0005700/Sjc_0006710/Sjc_0001512/Sjc_0003767/Sjc_0008906
GO:0045945	positive regulation of transcription by RNA polymerase III	18	-0.558834	-1.47644	0.049505	0.428645	0.398998	1197	tags=44%, list=14%, signal=38%	Sjc_0001890/Sjc_0008960/Sjc_0003306/Sjc_0002935/Sjc_0008962/Sjc_0009705/Sjc_0008961/Sjc_0009704
GO:0008298	intracellular mRNA localization	63	0.541175	1.67098	0.0497238	0.429742	0.400019	752	tags=21%, list=9%, signal=19%	Sjc_0004478/Sjc_0009528/Sjc_0002215/Sjc_0009527/Sjc_0009524/Sjc_0005604/Sjc_0009683/Sjc_0009515/Sjc_0005602/Sjc_0006396/Sjc_0005857/Sjc_0004313/Sjc_0003172
GO:0001964	startle response	17	0.671096	1.68929	0.0500143	0.431398	0.401561	2307	tags=71%, list=26%, signal=52%	Sjc_0009644/Sjc_0008133/Sjc_0002560/Sjc_0007486/Sjc_0006514/Sjc_0002356/Sjc_0003470/Sjc_0000580/Sjc_0005066/Sjc_0004342/Sjc_0004220/Sjc_0009336
GO:0006081	cellular aldehyde metabolic process	30	-0.495336	-1.48618	0.0501002	0.431398	0.401561	2249	tags=43%, list=26%, signal=32%	Sjc_0007797/Sjc_0002746/Sjc_0001605/Sjc_0007057/Sjc_0008550/Sjc_0007119/Sjc_0001169/Sjc_0009249/Sjc_0006769/Sjc_0000560/Sjc_0008801/Sjc_0001904/Sjc_0006464
GO:0030001	metal ion transport	318	-0.284575	-1.26669	0.0502695	0.432059	0.402176	1863	tags=28%, list=21%, signal=23%	Sjc_0003873/Sjc_0003147/Sjc_0003744/Sjc_0007013/Sjc_0002955/Sjc_0002583/Sjc_0009315/Sjc_0006613/Sjc_0006235/Sjc_0001280/Sjc_0006116/Sjc_0001555/Sjc_0001548/Sjc_0001318/Sjc_0006623/Sjc_0005149/Sjc_0002468/Sjc_0000931/Sjc_0005072/Sjc_0005151/Sjc_0007144/Sjc_0004620/Sjc_0001169/Sjc_0001590/Sjc_0005456/Sjc_0003801/Sjc_0003094/Sjc_0004304/Sjc_0005006/Sjc_0003647/Sjc_0008671/Sjc_0007047/Sjc_0003038/Sjc…
GO:0022602	ovulation cycle process	21	-0.546894	-1.4974	0.050421	0.432564	0.402646	601	tags=19%, list=7%, signal=18%	Sjc_0006627/Sjc_0001389/Sjc_0004118/Sjc_0001388
GO:0010226	response to lithium ion	21	-0.545729	-1.49421	0.0510321	0.435086	0.404994	864	tags=43%, list=10%, signal=39%	Sjc_0009167/Sjc_0000303/Sjc_0005424/Sjc_0003296/Sjc_0002791/Sjc_0002621/Sjc_0002622/Sjc_0000760/Sjc_0005423
GO:0035722	interleukin-12-mediated signaling pathway	29	-0.49398	-1.47485	0.0511811	0.435086	0.404994	2481	tags=59%, list=28%, signal=42%	Sjc_0009457/Sjc_0004525/Sjc_0005919/Sjc_0006071/Sjc_0003426/Sjc_0005005/Sjc_0006597/Sjc_0002388/Sjc_0007343/Sjc_0005157/Sjc_0000011/Sjc_0000823/Sjc_0008973/Sjc_0002589/Sjc_0003767/Sjc_0008447/Sjc_0006712
GO:0070671	response to interleukin-12	29	-0.49398	-1.47485	0.0511811	0.435086	0.404994	2481	tags=59%, list=28%, signal=42%	Sjc_0009457/Sjc_0004525/Sjc_0005919/Sjc_0006071/Sjc_0003426/Sjc_0005005/Sjc_0006597/Sjc_0002388/Sjc_0007343/Sjc_0005157/Sjc_0000011/Sjc_0000823/Sjc_0008973/Sjc_0002589/Sjc_0003767/Sjc_0008447/Sjc_0006712
GO:0071349	cellular response to interleukin-12	29	-0.49398	-1.47485	0.0511811	0.435086	0.404994	2481	tags=59%, list=28%, signal=42%	Sjc_0009457/Sjc_0004525/Sjc_0005919/Sjc_0006071/Sjc_0003426/Sjc_0005005/Sjc_0006597/Sjc_0002388/Sjc_0007343/Sjc_0005157/Sjc_0000011/Sjc_0000823/Sjc_0008973/Sjc_0002589/Sjc_0003767/Sjc_0008447/Sjc_0006712
GO:0035069	larval midgut histolysis	21	-0.526052	-1.44033	0.050813	0.435086	0.404994	1572	tags=43%, list=18%, signal=35%	Sjc_0005965/Sjc_0005398/Sjc_0002146/Sjc_0004761/Sjc_0000589/Sjc_0003515/Sjc_0008812/Sjc_0000590/Sjc_0007073
GO:0046011	regulation of oskar mRNA translation	10	0.730519	1.62521	0.0512984	0.43529	0.405184	1214	tags=40%, list=14%, signal=35%	Sjc_0004478/Sjc_0004313/Sjc_0006578/Sjc_0002420
GO:0046365	monosaccharide catabolic process	26	-0.510143	-1.48279	0.0516907	0.437823	0.407541	1136	tags=46%, list=13%, signal=40%	Sjc_0009284/Sjc_0001934/Sjc_0005974/Sjc_0000303/Sjc_0008801/Sjc_0005478/Sjc_0001512/Sjc_0007792/Sjc_0005424/Sjc_0004045/Sjc_0001904/Sjc_0005423
GO:0031329	regulation of cellular catabolic process	448	-0.254631	-1.16136	0.0517871	0.437845	0.407562	1901	tags=24%, list=22%, signal=20%	Sjc_0001754/Sjc_0004735/Sjc_0008232/Sjc_0004985/Sjc_0008858/Sjc_0003744/Sjc_0005348/Sjc_0006708/Sjc_0005254/Sjc_0000997/Sjc_0003455/Sjc_0006101/Sjc_0002381/Sjc_0006235/Sjc_0008774/Sjc_0007778/Sjc_0007885/Sjc_0005536/Sjc_0000227/Sjc_0001623/Sjc_0003996/Sjc_0006934/Sjc_0005887/Sjc_0008263/Sjc_0002146/Sjc_0005935/Sjc_0007687/Sjc_0003931/Sjc_0002835/Sjc_0007144/Sjc_0002388/Sjc_0005677/Sjc_0009374/Sjc…
GO:0007009	plasma membrane organization	41	-0.47411	-1.50781	0.0519751	0.438639	0.408301	2169	tags=39%, list=25%, signal=30%	Sjc_0004253/Sjc_0005455/Sjc_0000162/Sjc_0007525/Sjc_0001555/Sjc_0006194/Sjc_0003651/Sjc_0009184/Sjc_0005456/Sjc_0003359/Sjc_0007047/Sjc_0003387/Sjc_0002174/Sjc_0000688/Sjc_0007982/Sjc_0008804
GO:0060571	morphogenesis of an epithelial fold	22	-0.534337	-1.48192	0.0524969	0.442244	0.411656	1150	tags=41%, list=13%, signal=36%	Sjc_0008960/Sjc_0003306/Sjc_0002935/Sjc_0008962/Sjc_0003767/Sjc_0009705/Sjc_0008961/Sjc_0009704/Sjc_0009316
GO:0089718	amino acid import across plasma membrane	11	0.69779	1.58792	0.0534636	0.443928	0.413224	144	tags=18%, list=2%, signal=18%	Sjc_0008066/Sjc_0006682
GO:1902969	mitotic DNA replication	10	0.689972	1.535	0.0536481	0.443928	0.413224	1158	tags=50%, list=13%, signal=43%	Sjc_0006384/Sjc_0007506/Sjc_0006692/Sjc_0006385/Sjc_0005191
GO:0035020	regulation of Rac protein signal transduction	10	0.688996	1.53283	0.0536481	0.443928	0.413224	47	tags=10%, list=1%, signal=10%	Sjc_0009086
GO:0045600	positive regulation of fat cell differentiation	14	-0.591122	-1.47351	0.0534653	0.443928	0.413224	692	tags=64%, list=8%, signal=59%	Sjc_0006445/Sjc_0008821/Sjc_0007418/Sjc_0004530/Sjc_0003491/Sjc_0005370/Sjc_0005343/Sjc_0007728/Sjc_0007419
GO:0042129	regulation of T cell proliferation	29	-0.491677	-1.46797	0.0531496	0.443928	0.413224	1746	tags=45%, list=20%, signal=36%	Sjc_0005242/Sjc_0001293/Sjc_0007942/Sjc_0001318/Sjc_0008960/Sjc_0003306/Sjc_0002794/Sjc_0002935/Sjc_0008962/Sjc_0000809/Sjc_0009705/Sjc_0008961/Sjc_0009704
GO:0006022	aminoglycan metabolic process	29	-0.489872	-1.46259	0.0531496	0.443928	0.413224	187	tags=31%, list=2%, signal=30%	Sjc_0003871/Sjc_0001362/Sjc_0003016/Sjc_0003028/Sjc_0000447/Sjc_0003286/Sjc_0006882/Sjc_0006881/Sjc_0003316
GO:0061900	glial cell activation	16	-0.568986	-1.46123	0.0534653	0.443928	0.413224	1150	tags=44%, list=13%, signal=38%	Sjc_0008960/Sjc_0003306/Sjc_0002935/Sjc_0008962/Sjc_0009705/Sjc_0008961/Sjc_0009704
GO:0150076	neuroinflammatory response	16	-0.568986	-1.46123	0.0534653	0.443928	0.413224	1150	tags=44%, list=13%, signal=38%	Sjc_0008960/Sjc_0003306/Sjc_0002935/Sjc_0008962/Sjc_0009705/Sjc_0008961/Sjc_0009704
GO:0032436	positive regulation of proteasomal ubiquitin-dependent protein catabolic process	55	-0.423798	-1.4216	0.0528541	0.443928	0.413224	2399	tags=42%, list=27%, signal=31%	Sjc_0003895/Sjc_0004944/Sjc_0005251/Sjc_0009360/Sjc_0006661/Sjc_0006358/Sjc_0005254/Sjc_0000997/Sjc_0008263/Sjc_0005935/Sjc_0003931/Sjc_0002835/Sjc_0005677/Sjc_0007176/Sjc_0003232/Sjc_0007728/Sjc_0008490/Sjc_0005239/Sjc_0003515/Sjc_0003432/Sjc_0003431/Sjc_0008906/Sjc_0005934
GO:0051248	negative regulation of protein metabolic process	482	-0.253745	-1.16863	0.0529508	0.443928	0.413224	1715	tags=22%, list=19%, signal=19%	Sjc_0006101/Sjc_0000465/Sjc_0006235/Sjc_0007778/Sjc_0003523/Sjc_0005536/Sjc_0007124/Sjc_0003996/Sjc_0005887/Sjc_0005051/Sjc_0001318/Sjc_0003533/Sjc_0000574/Sjc_0009452/Sjc_0000188/Sjc_0007687/Sjc_0003386/Sjc_0000643/Sjc_0003096/Sjc_0005776/Sjc_0000731/Sjc_0000093/Sjc_0007144/Sjc_0005648/Sjc_0000668/Sjc_0009374/Sjc_0003454/Sjc_0001169/Sjc_0002490/Sjc_0002978/Sjc_0001372/Sjc_0005006/Sjc_0000168/Sjc…
GO:0046718	viral entry into host cell	16	-0.573732	-1.47341	0.0538864	0.444325	0.413593	650	tags=44%, list=7%, signal=41%	Sjc_0000273/Sjc_0008731/Sjc_0008409/Sjc_0008973/Sjc_0006700/Sjc_0003515/Sjc_0000272
GO:0035223	leg disc pattern formation	16	-0.573592	-1.47305	0.0538864	0.444325	0.413593	1569	tags=50%, list=18%, signal=41%	Sjc_0002069/Sjc_0008960/Sjc_0003306/Sjc_0002935/Sjc_0008962/Sjc_0009705/Sjc_0008961/Sjc_0009704
GO:0045746	negative regulation of Notch signaling pathway	45	-0.454281	-1.46748	0.0542797	0.446779	0.415878	1672	tags=31%, list=19%, signal=25%	Sjc_0008774/Sjc_0001254/Sjc_0002859/Sjc_0008960/Sjc_0001672/Sjc_0001047/Sjc_0003590/Sjc_0003306/Sjc_0002935/Sjc_0008962/Sjc_0003970/Sjc_0009705/Sjc_0008961/Sjc_0009704
GO:0032411	positive regulation of transporter activity	38	-0.466066	-1.45591	0.0543933	0.446925	0.416014	2048	tags=37%, list=23%, signal=28%	Sjc_0008268/Sjc_0005455/Sjc_0002583/Sjc_0001555/Sjc_0005456/Sjc_0000033/Sjc_0004471/Sjc_0001284/Sjc_0003767/Sjc_0008280/Sjc_0001877/Sjc_0001878/Sjc_0008804/Sjc_0000189
GO:0045581	negative regulation of T cell differentiation	17	-0.560798	-1.46425	0.055336	0.453872	0.42248	1150	tags=41%, list=13%, signal=36%	Sjc_0008960/Sjc_0003306/Sjc_0002935/Sjc_0008962/Sjc_0009705/Sjc_0008961/Sjc_0009704
GO:0030433	ubiquitin-dependent ERAD pathway	48	-0.447981	-1.45346	0.0554371	0.453903	0.42251	1641	tags=40%, list=19%, signal=32%	Sjc_0000227/Sjc_0006949/Sjc_0008321/Sjc_0005465/Sjc_0009374/Sjc_0008728/Sjc_0004514/Sjc_0005082/Sjc_0006453/Sjc_0001672/Sjc_0001299/Sjc_0003232/Sjc_0004294/Sjc_0000927/Sjc_0007728/Sjc_0004983/Sjc_0008484/Sjc_0003515/Sjc_0006212
GO:0007566	embryo implantation	34	0.585369	1.64304	0.0555556	0.454077	0.422671	570	tags=26%, list=6%, signal=25%	Sjc_0009528/Sjc_0002215/Sjc_0009527/Sjc_0009524/Sjc_0005604/Sjc_0009683/Sjc_0009515/Sjc_0005602/Sjc_0005857
GO:0036065	fucosylation	17	0.6583	1.65708	0.0560766	0.456713	0.425125	1054	tags=35%, list=12%, signal=31%	Sjc_0002471/Sjc_0004542/Sjc_0002469/Sjc_0002470/Sjc_0005903/Sjc_0007787
GO:0050685	positive regulation of mRNA processing	14	0.639767	1.55806	0.056338	0.456713	0.425125	14	tags=7%, list=0%, signal=7%	Sjc_0004478
GO:1903524	positive regulation of blood circulation	33	-0.49223	-1.50762	0.0563674	0.456713	0.425125	1670	tags=42%, list=19%, signal=35%	Sjc_0001280/Sjc_0001555/Sjc_0005456/Sjc_0008960/Sjc_0003306/Sjc_0002935/Sjc_0008962/Sjc_0001979/Sjc_0009705/Sjc_0001877/Sjc_0008961/Sjc_0009704/Sjc_0009386/Sjc_0001878
GO:0033198	response to ATP	20	-0.529583	-1.44504	0.056338	0.456713	0.425125	1450	tags=45%, list=16%, signal=38%	Sjc_0005072/Sjc_0005082/Sjc_0005700/Sjc_0001396/Sjc_0000303/Sjc_0005424/Sjc_0001877/Sjc_0001878/Sjc_0005423
GO:0071407	cellular response to organic cyclic compound	258	-0.302448	-1.30858	0.0560685	0.456713	0.425125	1341	tags=20%, list=15%, signal=17%	Sjc_0007280/Sjc_0001696/Sjc_0005082/Sjc_0003647/Sjc_0001029/Sjc_0001890/Sjc_0007047/Sjc_0005428/Sjc_0008960/Sjc_0004017/Sjc_0009284/Sjc_0007176/Sjc_0006480/Sjc_0002997/Sjc_0003306/Sjc_0002174/Sjc_0003604/Sjc_0006931/Sjc_0001396/Sjc_0000303/Sjc_0002935/Sjc_0003673/Sjc_0002613/Sjc_0005424/Sjc_0005238/Sjc_0008962/Sjc_0006084/Sjc_0002791/Sjc_0005111/Sjc_0008280/Sjc_0001710/Sjc_0002015/Sjc_0009705/Sjc…
GO:0007586	digestion	43	-0.457274	-1.46536	0.056962	0.460731	0.428865	1850	tags=49%, list=21%, signal=39%	Sjc_0005965/Sjc_0004680/Sjc_0003426/Sjc_0006937/Sjc_0002583/Sjc_0003594/Sjc_0002191/Sjc_0006623/Sjc_0006597/Sjc_0007314/Sjc_0002490/Sjc_0009284/Sjc_0002847/Sjc_0003246/Sjc_0006084/Sjc_0002491/Sjc_0001284/Sjc_0006085/Sjc_0008812/Sjc_0007073/Sjc_0009386
GO:0042130	negative regulation of T cell proliferation	19	-0.536012	-1.44555	0.0570866	0.46094	0.429059	1150	tags=42%, list=13%, signal=37%	Sjc_0008960/Sjc_0003306/Sjc_0002794/Sjc_0002935/Sjc_0008962/Sjc_0009705/Sjc_0008961/Sjc_0009704
GO:0035090	maintenance of apical/basal cell polarity	18	-0.54787	-1.44748	0.0574257	0.462877	0.430863	3441	tags=72%, list=39%, signal=44%	Sjc_0001515/Sjc_0005358/Sjc_0004443/Sjc_0007216/Sjc_0003603/Sjc_0000338/Sjc_0008847/Sjc_0005361/Sjc_0003651/Sjc_0004657/Sjc_0001901/Sjc_0001942/Sjc_0005357
GO:0022029	telencephalon cell migration	41	-0.460567	-1.46474	0.0582121	0.4676	0.435259	1150	tags=29%, list=13%, signal=26%	Sjc_0008960/Sjc_0001274/Sjc_0003306/Sjc_0002935/Sjc_0004419/Sjc_0008962/Sjc_0006627/Sjc_0002621/Sjc_0009705/Sjc_0008961/Sjc_0002622/Sjc_0009704
GO:0007595	lactation	30	-0.487867	-1.46377	0.0581162	0.4676	0.435259	1150	tags=33%, list=13%, signal=29%	Sjc_0008960/Sjc_0003306/Sjc_0002935/Sjc_0008962/Sjc_0007728/Sjc_0009705/Sjc_0008961/Sjc_0006237/Sjc_0009704/Sjc_0008892
GO:0050686	negative regulation of mRNA processing	34	-0.477397	-1.46202	0.0583333	0.467769	0.435416	1581	tags=38%, list=18%, signal=31%	Sjc_0006708/Sjc_0008939/Sjc_0003013/Sjc_0007144/Sjc_0008814/Sjc_0002421/Sjc_0001828/Sjc_0003799/Sjc_0003348/Sjc_0003223/Sjc_0009285/Sjc_0000306/Sjc_0006712
GO:0009607	response to biotic stimulus	315	-0.271996	-1.20843	0.0589683	0.47205	0.439401	1831	tags=29%, list=21%, signal=24%	Sjc_0005455/Sjc_0008920/Sjc_0001964/Sjc_0003654/Sjc_0003783/Sjc_0003122/Sjc_0003147/Sjc_0003744/Sjc_0007161/Sjc_0008449/Sjc_0002424/Sjc_0007456/Sjc_0000559/Sjc_0001293/Sjc_0001280/Sjc_0007778/Sjc_0009208/Sjc_0007942/Sjc_0001555/Sjc_0005051/Sjc_0006182/Sjc_0001318/Sjc_0002661/Sjc_0002146/Sjc_0000369/Sjc_0003013/Sjc_0002151/Sjc_0006194/Sjc_0003386/Sjc_0009409/Sjc_0007144/Sjc_0002388/Sjc_0008728/Sjc…
GO:0043470	regulation of carbohydrate catabolic process	24	-0.506484	-1.43111	0.0593047	0.472759	0.440061	1335	tags=25%, list=15%, signal=21%	Sjc_0002490/Sjc_0001934/Sjc_0003810/Sjc_0003673/Sjc_0002491/Sjc_0007073
GO:0019318	hexose metabolic process	97	-0.367052	-1.36232	0.0593607	0.472759	0.440061	1931	tags=33%, list=22%, signal=26%	Sjc_0008550/Sjc_0003286/Sjc_0001329/Sjc_0003543/Sjc_0001680/Sjc_0001236/Sjc_0004633/Sjc_0007290/Sjc_0005165/Sjc_0001169/Sjc_0002490/Sjc_0001890/Sjc_0009284/Sjc_0004929/Sjc_0001934/Sjc_0005974/Sjc_0003810/Sjc_0000303/Sjc_0008801/Sjc_0005478/Sjc_0003673/Sjc_0001512/Sjc_0007792/Sjc_0005424/Sjc_0004045/Sjc_0002491/Sjc_0001904/Sjc_0001724/Sjc_0006464/Sjc_0007073/Sjc_0005423/Sjc_0008906
GO:0032970	regulation of actin filament-based process	184	-0.321399	-1.32293	0.0593177	0.472759	0.440061	2579	tags=37%, list=29%, signal=27%	Sjc_0002553/Sjc_0001589/Sjc_0006350/Sjc_0006780/Sjc_0003491/Sjc_0009457/Sjc_0001150/Sjc_0004525/Sjc_0005335/Sjc_0004924/Sjc_0005480/Sjc_0000829/Sjc_0006858/Sjc_0000110/Sjc_0003095/Sjc_0008062/Sjc_0005479/Sjc_0009040/Sjc_0003426/Sjc_0001682/Sjc_0005455/Sjc_0007416/Sjc_0007453/Sjc_0008898/Sjc_0003769/Sjc_0005005/Sjc_0001754/Sjc_0009205/Sjc_0006349/Sjc_0004743/Sjc_0007586/Sjc_0001280/Sjc_0001555/Sjc…
GO:0006536	glutamate metabolic process	13	-0.595248	-1.48515	0.0596154	0.473172	0.440445	2678	tags=69%, list=30%, signal=48%	Sjc_0006944/Sjc_0003109/Sjc_0006681/Sjc_0008550/Sjc_0003061/Sjc_0007290/Sjc_0009284/Sjc_0007176/Sjc_0006467
GO:0071389	cellular response to mineralocorticoid stimulus	13	-0.595113	-1.48482	0.0596154	0.473172	0.440445	700	tags=31%, list=8%, signal=28%	Sjc_0005238/Sjc_0006237/Sjc_0000190/Sjc_0000189
GO:0005975	carbohydrate metabolic process	228	-0.30086	-1.27128	0.0597429	0.473379	0.440638	1966	tags=28%, list=22%, signal=22%	Sjc_0003060/Sjc_0008550/Sjc_0003286/Sjc_0001329/Sjc_0003543/Sjc_0003570/Sjc_0006716/Sjc_0001680/Sjc_0001236/Sjc_0004633/Sjc_0007119/Sjc_0004729/Sjc_0007778/Sjc_0007573/Sjc_0006182/Sjc_0002818/Sjc_0008446/Sjc_0002651/Sjc_0002662/Sjc_0007290/Sjc_0007314/Sjc_0005165/Sjc_0001169/Sjc_0002490/Sjc_0001642/Sjc_0009249/Sjc_0001890/Sjc_0009284/Sjc_0000589/Sjc_0007176/Sjc_0009770/Sjc_0004929/Sjc_0005286/Sjc…
GO:0030850	prostate gland development	16	0.631654	1.5749	0.0603622	0.475059	0.442202	403	tags=19%, list=5%, signal=18%	Sjc_0007629/Sjc_0003886/Sjc_0004026
GO:0055081	anion homeostasis	20	-0.52448	-1.43112	0.0603622	0.475059	0.442202	1433	tags=35%, list=16%, signal=29%	Sjc_0007290/Sjc_0002490/Sjc_0000812/Sjc_0002491/Sjc_0007728/Sjc_0002621/Sjc_0002622
GO:0007395	dorsal closure, spreading of leading edge cells	20	-0.521685	-1.42349	0.0603622	0.475059	0.442202	1150	tags=35%, list=13%, signal=30%	Sjc_0008960/Sjc_0003306/Sjc_0002935/Sjc_0008962/Sjc_0009705/Sjc_0008961/Sjc_0009704
GO:0045732	positive regulation of protein catabolic process	132	-0.336864	-1.31749	0.0603248	0.475059	0.442202	2399	tags=39%, list=27%, signal=29%	Sjc_0003895/Sjc_0004944/Sjc_0005251/Sjc_0004202/Sjc_0008409/Sjc_0001350/Sjc_0009360/Sjc_0006661/Sjc_0006358/Sjc_0001008/Sjc_0001009/Sjc_0003426/Sjc_0006033/Sjc_0004985/Sjc_0005254/Sjc_0000997/Sjc_0000816/Sjc_0009315/Sjc_0006101/Sjc_0000227/Sjc_0003996/Sjc_0008263/Sjc_0005935/Sjc_0003931/Sjc_0002835/Sjc_0007144/Sjc_0005677/Sjc_0006453/Sjc_0001313/Sjc_0001299/Sjc_0000150/Sjc_0007176/Sjc_0003232/Sjc…
GO:0043090	amino acid import	12	0.647163	1.51405	0.0609244	0.47768	0.444641	144	tags=17%, list=2%, signal=16%	Sjc_0008066/Sjc_0006682
GO:1903573	negative regulation of response to endoplasmic reticulum stress	23	-0.501971	-1.41019	0.0608519	0.47768	0.444641	1498	tags=39%, list=17%, signal=33%	Sjc_0007687/Sjc_0009374/Sjc_0005165/Sjc_0000575/Sjc_0003232/Sjc_0000111/Sjc_0007728/Sjc_0008484/Sjc_0008906
GO:0051262	protein tetramerization	63	-0.402134	-1.37608	0.0610022	0.47768	0.444641	1460	tags=27%, list=17%, signal=23%	Sjc_0001594/Sjc_0002388/Sjc_0003914/Sjc_0003561/Sjc_0000563/Sjc_0005286/Sjc_0000303/Sjc_0008801/Sjc_0005424/Sjc_0008386/Sjc_0000647/Sjc_0008280/Sjc_0005120/Sjc_0001877/Sjc_0001878/Sjc_0005423/Sjc_0000189
GO:0021545	cranial nerve development	22	-0.52645	-1.46005	0.0618158	0.479063	0.445929	1266	tags=45%, list=14%, signal=39%	Sjc_0008986/Sjc_0005568/Sjc_0008960/Sjc_0003306/Sjc_0002935/Sjc_0008962/Sjc_0009705/Sjc_0008961/Sjc_0008418/Sjc_0009704
GO:1903038	negative regulation of leukocyte cell-cell adhesion	27	-0.495718	-1.45558	0.0616302	0.479063	0.445929	1150	tags=33%, list=13%, signal=29%	Sjc_0008960/Sjc_0003306/Sjc_0002794/Sjc_0002935/Sjc_0008962/Sjc_0002015/Sjc_0009705/Sjc_0008961/Sjc_0009704
GO:0051851	modulation by host of symbiont process	27	-0.495606	-1.45525	0.0616302	0.479063	0.445929	2486	tags=44%, list=28%, signal=32%	Sjc_0008955/Sjc_0004924/Sjc_0004202/Sjc_0008920/Sjc_0001293/Sjc_0007144/Sjc_0006453/Sjc_0005123/Sjc_0006710/Sjc_0001512/Sjc_0003767/Sjc_0008906
GO:0032928	regulation of superoxide anion generation	15	-0.576942	-1.44995	0.062	0.479063	0.445929	1150	tags=60%, list=13%, signal=52%	Sjc_0007942/Sjc_0008960/Sjc_0003306/Sjc_0002935/Sjc_0008962/Sjc_0002015/Sjc_0009705/Sjc_0008961/Sjc_0009704
GO:0031349	positive regulation of defense response	106	-0.35502	-1.33707	0.0613208	0.479063	0.445929	1689	tags=29%, list=19%, signal=24%	Sjc_0001293/Sjc_0005370/Sjc_0009208/Sjc_0007942/Sjc_0005935/Sjc_0001417/Sjc_0006194/Sjc_0002437/Sjc_0008728/Sjc_0001696/Sjc_0005082/Sjc_0007343/Sjc_0000033/Sjc_0008960/Sjc_0003038/Sjc_0005700/Sjc_0003371/Sjc_0003306/Sjc_0002174/Sjc_0006710/Sjc_0002935/Sjc_0000779/Sjc_0004419/Sjc_0008962/Sjc_0002529/Sjc_0003767/Sjc_0009705/Sjc_0008961/Sjc_0000781/Sjc_0009704/Sjc_0005934
GO:0072507	divalent inorganic cation homeostasis	169	-0.321017	-1.30619	0.0619283	0.479063	0.445929	1860	tags=28%, list=21%, signal=23%	Sjc_0003147/Sjc_0003744/Sjc_0007013/Sjc_0008787/Sjc_0006235/Sjc_0003938/Sjc_0006116/Sjc_0001555/Sjc_0001548/Sjc_0001318/Sjc_0006623/Sjc_0005149/Sjc_0002468/Sjc_0005072/Sjc_0007290/Sjc_0001841/Sjc_0005456/Sjc_0003801/Sjc_0005082/Sjc_0007047/Sjc_0008960/Sjc_0003038/Sjc_0003836/Sjc_0003232/Sjc_0000111/Sjc_0002997/Sjc_0003306/Sjc_0003810/Sjc_0001396/Sjc_0000468/Sjc_0002935/Sjc_0008962/Sjc_0002791/Sjc…
GO:0043207	response to external biotic stimulus	303	-0.275605	-1.2217	0.061985	0.479063	0.445929	2001	tags=30%, list=23%, signal=24%	Sjc_0005455/Sjc_0008920/Sjc_0001964/Sjc_0003654/Sjc_0003783/Sjc_0003122/Sjc_0003147/Sjc_0003744/Sjc_0007161/Sjc_0008449/Sjc_0002424/Sjc_0007456/Sjc_0000559/Sjc_0001293/Sjc_0001280/Sjc_0007778/Sjc_0009208/Sjc_0007942/Sjc_0001555/Sjc_0005051/Sjc_0006182/Sjc_0001318/Sjc_0002661/Sjc_0002146/Sjc_0000369/Sjc_0003013/Sjc_0002151/Sjc_0006194/Sjc_0003386/Sjc_0009409/Sjc_0007144/Sjc_0002388/Sjc_0008728/Sjc…
GO:0051707	response to other organism	303	-0.275605	-1.2217	0.061985	0.479063	0.445929	2001	tags=30%, list=23%, signal=24%	Sjc_0005455/Sjc_0008920/Sjc_0001964/Sjc_0003654/Sjc_0003783/Sjc_0003122/Sjc_0003147/Sjc_0003744/Sjc_0007161/Sjc_0008449/Sjc_0002424/Sjc_0007456/Sjc_0000559/Sjc_0001293/Sjc_0001280/Sjc_0007778/Sjc_0009208/Sjc_0007942/Sjc_0001555/Sjc_0005051/Sjc_0006182/Sjc_0001318/Sjc_0002661/Sjc_0002146/Sjc_0000369/Sjc_0003013/Sjc_0002151/Sjc_0006194/Sjc_0003386/Sjc_0009409/Sjc_0007144/Sjc_0002388/Sjc_0008728/Sjc…
GO:0007210	serotonin receptor signaling pathway	10	0.685662	1.52541	0.0622318	0.480059	0.446856	137	tags=20%, list=2%, signal=20%	Sjc_0000994/Sjc_0004493
GO:0051341	regulation of oxidoreductase activity	39	-0.462021	-1.45149	0.0623701	0.480332	0.44711	1210	tags=33%, list=14%, signal=29%	Sjc_0004137/Sjc_0008960/Sjc_0003306/Sjc_0003467/Sjc_0002935/Sjc_0008962/Sjc_0002015/Sjc_0002621/Sjc_0009705/Sjc_0008961/Sjc_0002622/Sjc_0006237/Sjc_0009704
GO:1903533	regulation of protein targeting	37	-0.467106	-1.45853	0.0625	0.48054	0.447303	1335	tags=32%, list=15%, signal=28%	Sjc_0002490/Sjc_0008960/Sjc_0001274/Sjc_0003306/Sjc_0002935/Sjc_0008962/Sjc_0002491/Sjc_0009235/Sjc_0009705/Sjc_0008961/Sjc_0009704/Sjc_0007295
GO:0003091	renal water homeostasis	11	-0.621337	-1.49017	0.063197	0.4851	0.451548	2547	tags=55%, list=29%, signal=39%	Sjc_0009408/Sjc_0009407/Sjc_0006904/Sjc_0009409/Sjc_0002794/Sjc_0009411
GO:0034599	cellular response to oxidative stress	145	-0.32771	-1.29615	0.0638821	0.489553	0.455693	2001	tags=32%, list=23%, signal=25%	Sjc_0005455/Sjc_0002941/Sjc_0003654/Sjc_0001329/Sjc_0003744/Sjc_0004425/Sjc_0001236/Sjc_0001293/Sjc_0007942/Sjc_0001555/Sjc_0005051/Sjc_0000042/Sjc_0005149/Sjc_0002388/Sjc_0000668/Sjc_0001169/Sjc_0002490/Sjc_0005456/Sjc_0004663/Sjc_0008261/Sjc_0005428/Sjc_0008960/Sjc_0001219/Sjc_0003306/Sjc_0004169/Sjc_0001396/Sjc_0002935/Sjc_0007792/Sjc_0005249/Sjc_0008962/Sjc_0008973/Sjc_0002491/Sjc_0007728/Sjc…
GO:0035195	miRNA-mediated gene silencing	60	-0.40507	-1.37831	0.0641026	0.489634	0.455769	1819	tags=33%, list=21%, signal=27%	Sjc_0007161/Sjc_0008449/Sjc_0000559/Sjc_0007778/Sjc_0003709/Sjc_0007144/Sjc_0001696/Sjc_0001029/Sjc_0005428/Sjc_0008960/Sjc_0002354/Sjc_0003306/Sjc_0002935/Sjc_0008962/Sjc_0005808/Sjc_0009705/Sjc_0008961/Sjc_0009704/Sjc_0004988/Sjc_0006712
GO:0033135	regulation of peptidyl-serine phosphorylation	60	-0.405065	-1.37829	0.0641026	0.489634	0.455769	1335	tags=25%, list=15%, signal=21%	Sjc_0002490/Sjc_0008960/Sjc_0003306/Sjc_0002935/Sjc_0003673/Sjc_0005445/Sjc_0008962/Sjc_0005111/Sjc_0005447/Sjc_0002491/Sjc_0009705/Sjc_0008961/Sjc_0006237/Sjc_0009704/Sjc_0008906
GO:0007565	female pregnancy	62	0.511923	1.57404	0.0645756	0.492244	0.458199	671	tags=19%, list=8%, signal=18%	Sjc_0009528/Sjc_0002215/Sjc_0009527/Sjc_0009524/Sjc_0005604/Sjc_0009683/Sjc_0009515/Sjc_0005602/Sjc_0006377/Sjc_0003079/Sjc_0005857/Sjc_0003059
GO:0051315	attachment of mitotic spindle microtubules to kinetochore	11	0.656526	1.49402	0.0646552	0.492244	0.458199	717	tags=27%, list=8%, signal=25%	Sjc_0008661/Sjc_0001119/Sjc_0008660
GO:0048875	chemical homeostasis within a tissue	14	-0.580329	-1.44661	0.0653465	0.49589	0.461592	1150	tags=50%, list=13%, signal=44%	Sjc_0008960/Sjc_0003306/Sjc_0002935/Sjc_0008962/Sjc_0009705/Sjc_0008961/Sjc_0009704
GO:0086010	membrane depolarization during action potential	18	-0.543581	-1.43615	0.0653465	0.49589	0.461592	867	tags=28%, list=10%, signal=25%	Sjc_0001396/Sjc_0005238/Sjc_0008804/Sjc_0000190/Sjc_0000189
GO:0050771	negative regulation of axonogenesis	27	-0.494363	-1.4516	0.0656064	0.497053	0.462675	2503	tags=52%, list=28%, signal=37%	Sjc_0007300/Sjc_0009207/Sjc_0005480/Sjc_0005479/Sjc_0007299/Sjc_0001280/Sjc_0006924/Sjc_0001274/Sjc_0000914/Sjc_0004419/Sjc_0002621/Sjc_0002622/Sjc_0003645/Sjc_0007295
GO:0001824	blastocyst development	57	0.510477	1.55699	0.0659134	0.49857	0.464087	1514	tags=33%, list=17%, signal=28%	Sjc_0009528/Sjc_0002215/Sjc_0009527/Sjc_0009524/Sjc_0005604/Sjc_0009683/Sjc_0006384/Sjc_0009515/Sjc_0005602/Sjc_0007506/Sjc_0005857/Sjc_0006385/Sjc_0006150/Sjc_0005603/Sjc_0007532/Sjc_0006313/Sjc_0005505/Sjc_0005108/Sjc_0001856
GO:0061097	regulation of protein tyrosine kinase activity	47	-0.439139	-1.42966	0.067086	0.499879	0.465305	1150	tags=26%, list=13%, signal=22%	Sjc_0008960/Sjc_0003306/Sjc_0002935/Sjc_0005646/Sjc_0008962/Sjc_0001942/Sjc_0002621/Sjc_0009705/Sjc_0008961/Sjc_0002622/Sjc_0009704/Sjc_0008906
GO:0070886	positive regulation of calcineurin-NFAT signaling cascade	19	-0.527736	-1.42323	0.0669291	0.499879	0.465305	1150	tags=42%, list=13%, signal=37%	Sjc_0001548/Sjc_0008960/Sjc_0003306/Sjc_0002935/Sjc_0008962/Sjc_0009705/Sjc_0008961/Sjc_0009704
GO:0106058	positive regulation of calcineurin-mediated signaling	19	-0.527736	-1.42323	0.0669291	0.499879	0.465305	1150	tags=42%, list=13%, signal=37%	Sjc_0001548/Sjc_0008960/Sjc_0003306/Sjc_0002935/Sjc_0008962/Sjc_0009705/Sjc_0008961/Sjc_0009704
GO:0007589	body fluid secretion	44	-0.44106	-1.42027	0.0672269	0.499879	0.465305	1150	tags=27%, list=13%, signal=24%	Sjc_0008960/Sjc_0003306/Sjc_0002935/Sjc_0008962/Sjc_0001284/Sjc_0007728/Sjc_0001979/Sjc_0009705/Sjc_0008961/Sjc_0006237/Sjc_0009704/Sjc_0008892
GO:0035384	thioester biosynthetic process	21	-0.507386	-1.38923	0.0670732	0.499879	0.465305	1880	tags=52%, list=21%, signal=41%	Sjc_0001807/Sjc_0001329/Sjc_0001236/Sjc_0002773/Sjc_0003115/Sjc_0007032/Sjc_0002485/Sjc_0009110/Sjc_0005414/Sjc_0003021/Sjc_0003114
GO:0071616	acyl-CoA biosynthetic process	21	-0.507386	-1.38923	0.0670732	0.499879	0.465305	1880	tags=52%, list=21%, signal=41%	Sjc_0001807/Sjc_0001329/Sjc_0001236/Sjc_0002773/Sjc_0003115/Sjc_0007032/Sjc_0002485/Sjc_0009110/Sjc_0005414/Sjc_0003021/Sjc_0003114
GO:0006929	substrate-dependent cell migration	21	-0.507172	-1.38864	0.0670732	0.499879	0.465305	842	tags=38%, list=10%, signal=35%	Sjc_0008878/Sjc_0006670/Sjc_0008172/Sjc_0001412/Sjc_0006627/Sjc_0008877/Sjc_0002621/Sjc_0002622
GO:2001242	regulation of intrinsic apoptotic signaling pathway	64	-0.396114	-1.36362	0.0668103	0.499879	0.465305	1575	tags=30%, list=18%, signal=25%	Sjc_0002661/Sjc_0006194/Sjc_0002388/Sjc_0005677/Sjc_0003914/Sjc_0004663/Sjc_0005428/Sjc_0007821/Sjc_0003232/Sjc_0000111/Sjc_0005497/Sjc_0001137/Sjc_0008973/Sjc_0007728/Sjc_0001710/Sjc_0007923/Sjc_0009285/Sjc_0000306/Sjc_0008906
GO:0034404	nucleobase-containing small molecule biosynthetic process	98	-0.361283	-1.35171	0.0672646	0.499879	0.465305	1335	tags=24%, list=15%, signal=21%	Sjc_0002490/Sjc_0004457/Sjc_0009284/Sjc_0001219/Sjc_0007880/Sjc_0005974/Sjc_0000303/Sjc_0008801/Sjc_0005478/Sjc_0003673/Sjc_0001512/Sjc_0002843/Sjc_0005424/Sjc_0004045/Sjc_0002491/Sjc_0001904/Sjc_0001979/Sjc_0000854/Sjc_0001759/Sjc_0002731/Sjc_0003515/Sjc_0006464/Sjc_0008892/Sjc_0005423
GO:0034284	response to monosaccharide	99	-0.357885	-1.33924	0.0663717	0.499879	0.465305	1766	tags=34%, list=20%, signal=28%	Sjc_0000412/Sjc_0001236/Sjc_0001293/Sjc_0001280/Sjc_0003523/Sjc_0005151/Sjc_0002388/Sjc_0001841/Sjc_0007314/Sjc_0002490/Sjc_0001890/Sjc_0004012/Sjc_0003038/Sjc_0009284/Sjc_0007176/Sjc_0001396/Sjc_0000303/Sjc_0008801/Sjc_0001790/Sjc_0005424/Sjc_0002484/Sjc_0005432/Sjc_0004045/Sjc_0002491/Sjc_0007728/Sjc_0002015/Sjc_0002621/Sjc_0002622/Sjc_0009386/Sjc_0009285/Sjc_0000306/Sjc_0008892/Sjc_0005423/Sjc…
GO:0034330	cell junction organization	174	-0.320617	-1.31044	0.0667799	0.499879	0.465305	1968	tags=25%, list=22%, signal=20%	Sjc_0002542/Sjc_0003769/Sjc_0005005/Sjc_0003511/Sjc_0009205/Sjc_0007525/Sjc_0002424/Sjc_0006878/Sjc_0001280/Sjc_0000442/Sjc_0001623/Sjc_0005887/Sjc_0001318/Sjc_0003651/Sjc_0002823/Sjc_0004657/Sjc_0000731/Sjc_0008878/Sjc_0006095/Sjc_0002380/Sjc_0004304/Sjc_0005006/Sjc_0003038/Sjc_0002174/Sjc_0006710/Sjc_0001412/Sjc_0009375/Sjc_0002342/Sjc_0000868/Sjc_0005661/Sjc_0002791/Sjc_0005111/Sjc_0006908/Sjc…
